# Supplementary material for: Stress tolerance enhancement via SPT15 base editing in Saccharomyces cerevisiae
Source: PubMed Central journal article supplement (PMC8259078; doi:10.1186/s13068-021-02005-w), 2021-07-06
Supplement: 13068_2021_2005_MOESM1_ESM.pdf [file 13068_2021_2005_MOESM1_ESM.pdf]

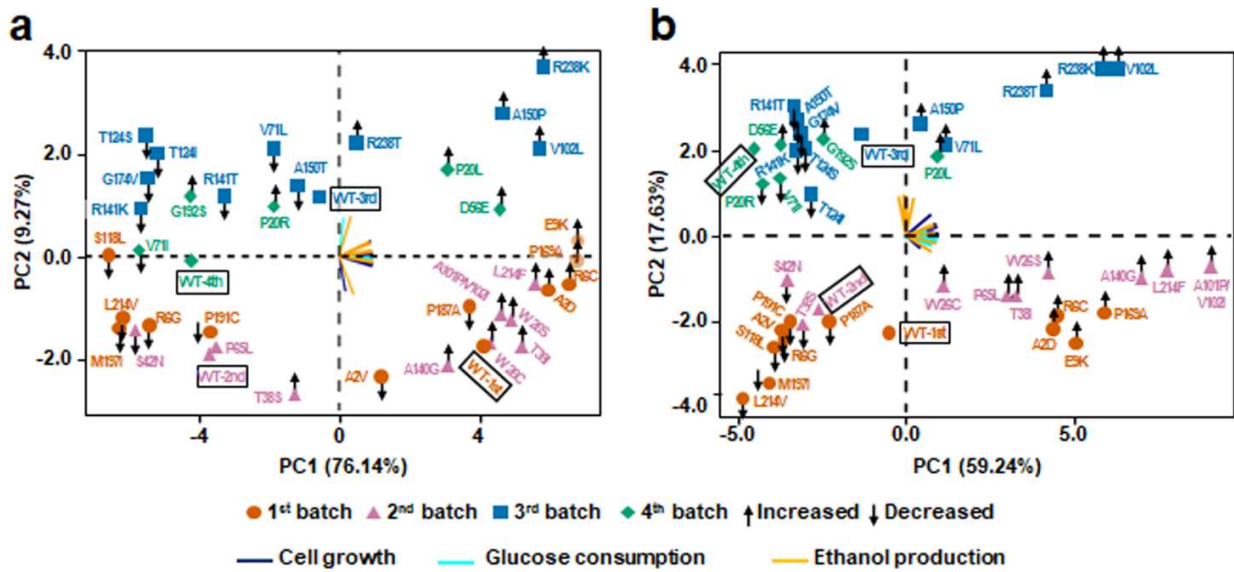

1  
 2 **Fig. S1 Principal component analysis of fermentation data at thermal (a) and**  
 3 **ethanol (b) stress conditions.**

4 Fermentation data, including cell growth (purple lines), glucose consumption (turquoise  
 5 lines) and ethanol production (orange lines) during fermentation (hours 0, 6, 12, 18, 24,  
 6 30, 36, 42 and 48), were from all the 36 Spt15 mutant strains and the wild type strain  
 7 BY4741 at normal and three stress conditions. Means of biological duplicates are used.  
 8 The strains were evaluated in 4 batches, indicated using the circle, triangle, square and  
 9 diamond symbols, respectively. Compared to the wild type strain in each batch, mutant  
 10 Spt15 strains showing increased or decreased fermentation capacities are indicated by  
 11 upward arrow or downward arrow, respectively.

12

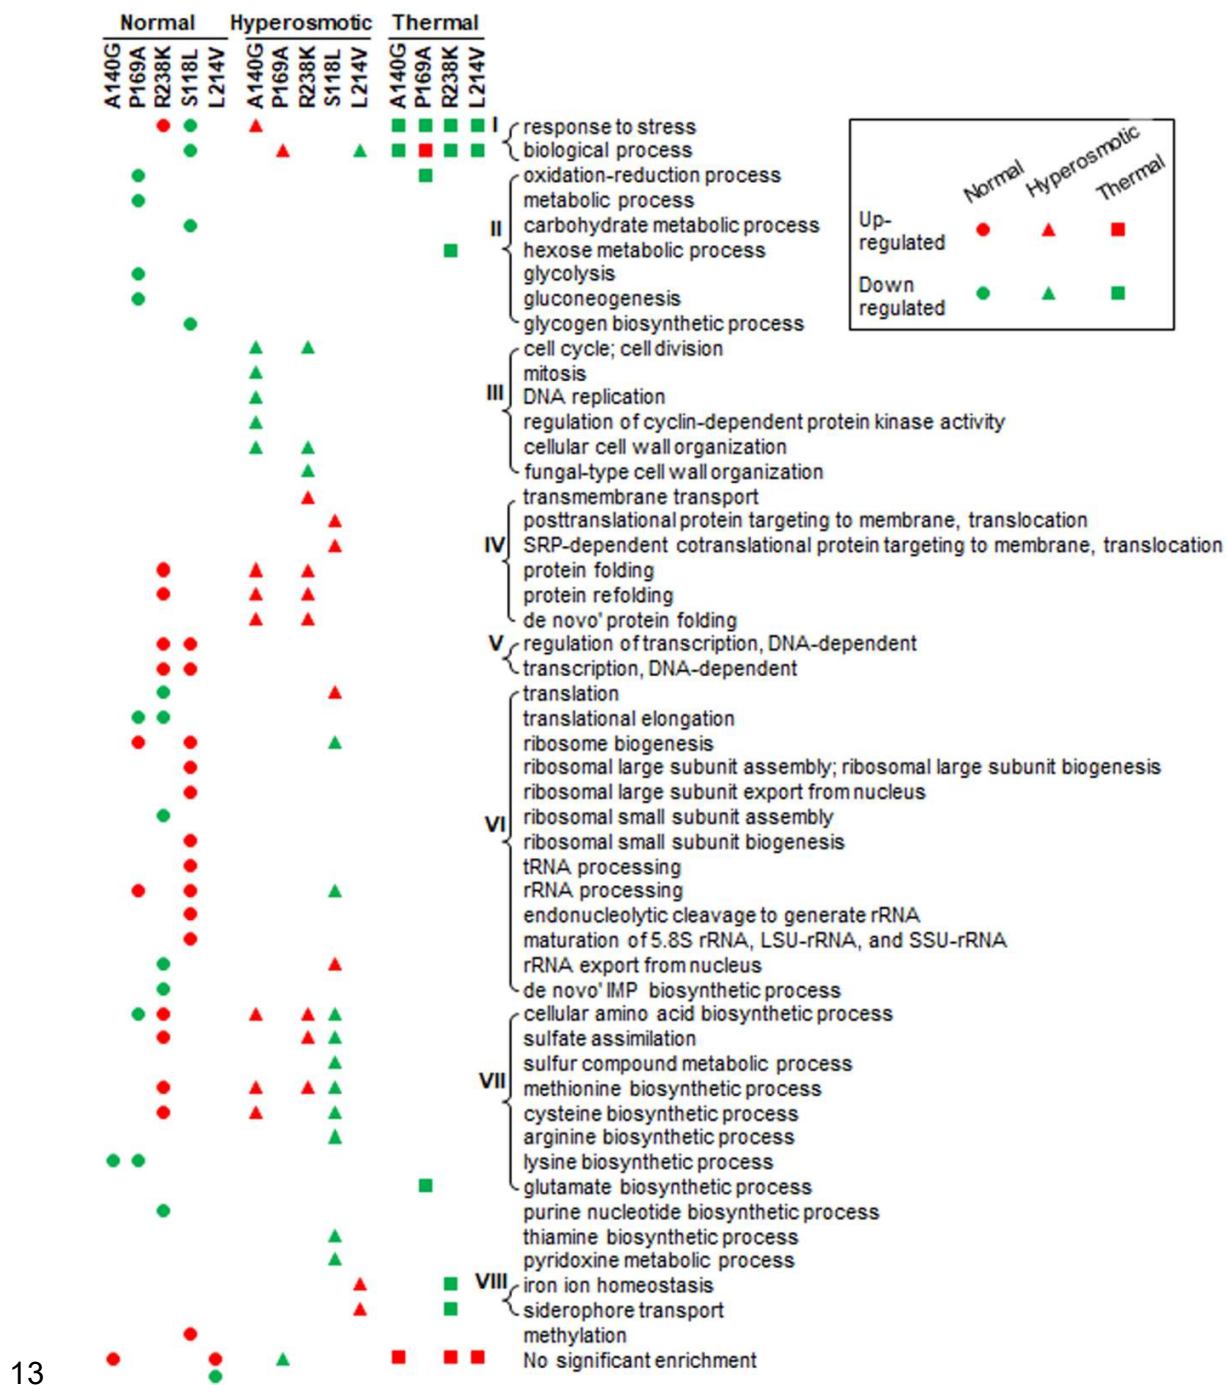

17 including normal (circle symbol), hyperosmotic (triangle symbol) and thermal (square  
18 symbol) stress conditions. Up-regulated and down-regulated SDEGs were separately  
19 subjected to GO enrichment analysis, which are indicated in red and green, respectively.
