# Supplementary material for: Stress tolerance enhancement via SPT15 base editing in Saccharomyces cerevisiae
Source: Biotechnol Biofuels. 2021 Jul 6;14:155. doi: 10.1186/s13068-021-02005-w (PMC8259078; doi:10.1186/s13068-021-02005-w)
Supplement: Supplementary file 5 — Additional file 5: Dataset S1. SDEG lists in the comparisons of Spt15 mutants vs. WT at normal condition. [file 13068_2021_2005_MOESM5_ESM.xlsx]

## Sheet: A140G vs. WT
Gene ID	log2(Fold_change)	p-value	FDR p-value correction	mRNA expression level at Normal condition				YEASTRACT 2019 TF	Gene	Gene Function
				Spt15 mutant strain A140G		Wild type strain BY4741
				Duplicate#1	Duplicate#2	Duplicate#1	Duplicate#2
snR14	10.6078	4.83334e-13	2.56914e-11	22.864	25.29	0	0	No	snR14	- -
YGR027W-A	10.5092	8.30427e-09	1.91917e-07	32.579	12.425	0	0	No	YGR027W-A	Retrotransposon TYA Gag gene co-transcribed with TYB Pol; translated as TYA or TYA-TYB polyprotein; Gag is a nucleocapsid protein that is the structural constituent of virus-like particles (VLPs); similar to retroviral Gag gag protein
YPR158C-C	9.74092	1.75956e-11	7.14454e-10	36.125	35.654	0.074	0	No	YPR158C-C	Retrotransposon TYA Gag gene co-transcribed with TYB Pol; translated as TYA or TYA-TYB polyprotein; Gag is a nucleocapsid protein that is the structural constituent of virus-like particles (VLPs); similar to retroviral Gag gag protein
YAR010C	9.70077	5.83236e-11	2.00599e-09	12.765	12.942	0	0	No	YAR010C	Retrotransposon TYA Gag gene co-transcribed with TYB Pol; Gag processing produces capsid proteins; in YARCTy1-1 TYB is mutant and probably non-functional gag protein
YPR137C-A	9.70077	5.83236e-11	2.00599e-09	12.765	12.942	0	0	No	YPR137C-A	Retrotransposon TYA Gag gene co-transcribed with TYB Pol; translated as TYA or TYA-TYB polyprotein; Gag is a nucleocapsid protein that is the structural constituent of virus-like particles (VLPs); similar to retroviral Gag gag protein
YDR039C	8.07985	3.81329e-07	6.21068e-06	5.85	2.522	0	0	No	ENA2	P-type ATPase sodium pump; involved in Na+ efflux to allow salt tolerance; likely not involved in Li+ efflux Na(+)-exporting P-type ATPase ENA2
YJR026W	7.87107	5.6028e-07	8.80633e-06	4.289	2.919	0	0	No	YJR026W	Retrotransposon TYA Gag gene co-transcribed with TYB Pol; translated as TYA or TYA-TYB polyprotein; Gag is a nucleocapsid protein that is the structural constituent of virus-like particles (VLPs); similar to retroviral Gag gag protein
YLR227W-A	7.87107	5.6028e-07	8.80633e-06	4.289	2.919	0	0	No	YLR227W-A	Retrotransposon TYA Gag gene co-transcribed with TYB Pol; translated as TYA or TYA-TYB polyprotein; Gag is a nucleocapsid protein that is the structural constituent of virus-like particles (VLPs); similar to retroviral Gag gag protein
YML040W	7.87107	5.6028e-07	8.80633e-06	4.289	2.919	0	0	No	YML040W	Retrotransposon TYA Gag gene co-transcribed with TYB Pol; translated as TYA or TYA-TYB polyprotein; Gag is a nucleocapsid protein that is the structural constituent of virus-like particles (VLPs); similar to retroviral Gag gag protein
YNL339C	7.21905	1.58155e-06	2.21759e-05	6.791	5.761	0	0.122	No	YRF1-6	Helicase encoded by the Y' element of subtelomeric regions; highly expressed in the mutants lacking the telomerase component TLC1; potentially phosphorylated by Cdc28p Y' element ATP-dependent helicase protein 1 copy 6
YHR125W	2.87462	4.55703e-05	0.000463757	4.641	2.732	0.539	0.511	No	YHR125W	hypothetical protein; conserved across S. cerevisiae strains hypothetical protein
YMR011W	2.71053	3.12511e-37	3.04542e-34	514.305	525.245	65.011	98.74	No	HXT2	High-affinity glucose transporter of the major facilitator superfamily; expression is induced by low levels of glucose and repressed by high levels of glucose hexose transporter HXT2
YFL066C	2.51303	0.000962329	0.00664314	2.171	3.624	0.711	0.322	No	YFL066C	Helicase-like protein encoded within the telomeric Y' element; induced by treatment with 8-methoxypsoralen and UVA irradiation; SWAT-GFP and mCherry fusion proteins localize to the nucleus Y' element ATP-dependent helicase
YMR322C	2.39062	7.49746e-10	2.07479e-08	12.476	9.924	1.936	2.401	No	SNO4	Possible chaperone and cysteine protease; required for transcriptional reprogramming during the diauxic shift and for survival in stationary phase; similar to bacterial Hsp31 and yeast Hsp31p, Hsp32p, and Hsp33p; DJ-1/ThiJ/PfpI superfamily member; predicted involvement in pyridoxine metabolism; induced by mild heat stress and copper deprivation glutathione-independent methylglyoxalase family prot…
YMR040W	2.31412	1.46052e-51	4.26984e-48	159.89	163.347	33.43	33.695	No	YET2	hypothetical protein that may interact with ribosomes; based on co-purification experiments; homolog of human BAP31 protein; YET2 has a paralog, YET1, that arose from the whole genome duplication Yet2p
YKR034W	2.29328	1.00497e-06	1.47269e-05	6.625	6.554	1.495	1.223	Yes	DAL80	Negative regulator of genes in multiple nitrogen degradation pathways; expression is regulated by nitrogen levels and by Gln3p; member of the GATA-binding family, forms homodimers and heterodimers with Gzf3p; DAL80 has a paralog, GZF3, that arose from the whole genome duplication Dal80p
YMR251W-A	2.26608	8.70668e-40	1.01816e-36	2148.77	2561.3	453.775	556.333	No	HOR7	hypothetical protein; overexpression suppresses Ca2+ sensitivity of mutants lacking inositol phosphorylceramide mannosyltransferases Csg1p and Csh1p; transcription is induced under hyperosmotic stress and repressed by alpha factor; HOR7 has a paralog, DDR2, that arose from the whole genome duplication Hor7p
YMR184W	2.26524	5.19221e-48	1.01196e-44	268.946	273.45	53.834	62.577	No	ADD37	hypothetical protein; involved in ER-associated protein degradation; green fluorescent protein (GFP)-fusion protein localizes to the cytoplasm and is induced in response to the DNA-damaging agent MMS; YMR184W is not an essential gene; protein abundance increases in response to DNA replication stress Add37p
YFL067W	2.25198	2.50182e-08	5.28092e-07	9.147	13.361	2.819	2.068	No	YFL067W	hypothetical protein; down-regulated at low calcium levels; mCherry fusion protein localizes to the vacuole hypothetical protein
YMR244W	2.0628	5.15203e-11	1.82569e-09	19.918	15.487	4.657	4.113	No	YMR244W	hypothetical protein; SWAT-GFP fusion protein localizes to the endoplasmic reticulum and vacuole, while mCherry fusion localizes to just the vacuole hypothetical protein
YML054C	2.01268	1.3709e-28	5.34377e-26	149.719	169.857	45.256	36.486	No	CYB2	Cytochrome b2 (L-lactate cytochrome-c oxidoreductase); component of the mitochondrial intermembrane space, required for lactate utilization; expression is repressed by glucose and anaerobic conditions Cyb2p
YER137C	1.93755	3.34679e-10	9.98403e-09	16.672	18.218	3.946	5.458	No	YER137C	hypothetical protein
YFL062W	1.89333	0.0103308	0.0497154	3.545	2.555	0.355	1.334	No	COS4	Endosomal protein involved in turnover of plasma membrane proteins; member of the DUP380 subfamily of conserved, often subtelomeric COS genes; required for the multivesicular vesicle body sorting pathway that internalizes plasma membrane proteins for degradation; Cos proteins provide ubiquitin in trans for nonubiquitinated cargo proteins Cos4p
YMR041C	1.8756	2.63422e-33	1.92529e-30	136.334	134.203	39.227	36.797	No	ARA2	NAD-dependent arabinose dehydrogenase; involved in biosynthesis of dehydro-D-arabinono-1,4-lactone; similar to plant L-galactose dehydrogenase D-arabinose 1-dehydrogenase (NAD(P)(+)) ARA2
YMR052W	1.87311	7.93868e-14	4.91432e-12	40.208	38.1	8.946	13.051	No	FAR3	hypothetical protein; involved in recovery from cell cycle arrest in response to pheromone, in a Far1p-independent pathway; interacts with Far7p, Far8p, Far9p, Far10p, and Far11p; localizes to the endoplasmic reticulum; protein abundance increases in response to DNA replication stress Far3p
YMR112C	1.86712	5.60419e-19	7.12342e-17	142.235	144.149	33.198	47.803	No	MED11	Subunit of the RNA polymerase II mediator complex; associates with core polymerase subunits to form the RNA polymerase II holoenzyme; essential protein Med11p
YLR307C-A	1.85838	0.000791522	0.0056716	6.512	5.21	0.858	2.435	No	YLR307C-A	hypothetical protein
YFL058W	1.83959	0.000820834	0.00583161	3.959	4.13	1.066	1.234	No	THI5	Protein involved in synthesis of the thiamine precursor HMP; member of a subtelomeric gene family including THI5, THI11, THI12, and THI13; hydroxymethylpyrimidine is also known as HMP 4-amino-5-hydroxymethyl-2-methylpyrimidine phosphate synthase
YLR423C	1.81568	6.81737e-15	5.38665e-13	64.094	65.438	15.269	22.656	No	ATG17	Scaffold protein responsible for phagophore assembly site organization; regulatory subunit of an autophagy-specific complex that includes Atg1p and Atg13p; stimulates Atg1p kinase activity; human ortholog RB1CC1/FIP200 interacts with p53, which inhibits autophagy in human cells protein kinase regulatory subunit ATG17
YML130C	1.80619	1.68493e-41	2.46294e-38	388.494	399.513	115.316	117.272	No	ERO1	Thiol oxidase required for oxidative protein folding in the ER; essential for maintaining ER redox balance; feedback regulated via reduction and oxidation of regulatory bonds; reduced Pdi1p activates Ero1p by direct reduction of Ero1p regulatory bonds; depletion of thiol substrates and accumulation of oxidized Pdi1p results in inactivation of Ero1p by both Pdi1p-mediated oxidation and autonomous …
YML045W-A	1.77886	5.73424e-10	1.62758e-08	91.65	83.921	34.791	18.154	No	YML045W-A	Retrotransposon TYA Gag gene co-transcribed with TYB Pol; translated as TYA or TYA-TYB polyprotein; Gag is a nucleocapsid protein that is the structural constituent of virus-like particles (VLPs); similar to retroviral Gag gag protein
YMR323W	1.74883	6.27872e-07	9.80414e-06	10.098	12.491	3.603	3.313	No	ERR3	Enolase, a phosphopyruvate hydratase; catalyzes the conversion of 2-phosphoglycerate to phosphoenolpyruvate; complements the growth defect of an ENO1 ENO2 double mutant in glucose phosphopyruvate hydratase ERR3
YMR191W	1.74498	1.80057e-29	8.77328e-27	304.296	320.406	88.65	103.554	No	SPG5	Protein required for proteasome assembly during quiescence; binds to base of the proteasome regulartory particle; required for survival at high temperature during stationary phase; not required for growth on nonfermentable carbon sources Spg5p
YMR214W	1.73672	1.17922e-27	3.83051e-25	226.278	219.886	63.454	74.694	No	SCJ1	One of several homologs of bacterial chaperone DnaJ; located in the ER lumen where it cooperates with Kar2p to mediate maturation of proteins Scj1p
YMR252C	1.72271	2.87492e-29	1.29305e-26	276.998	307.915	86.468	96.372	No	YMR252C	hypothetical protein; green fluorescent protein (GFP)-fusion protein localizes to mitochondria; YMR252C is not an essential gene hypothetical protein
YMR101C	1.69247	0.00118135	0.00793945	3.938	5.067	1.434	1.412	No	SRT1	Forms the dehydrodolichyl diphosphate syntase (DDS) complex with NUS1; involved in synthesis of long-chain dolichols (19-22 isoprene units; as opposed to Rer2p which synthesizes shorter-chain dolichols); localizes to lipid bodies; transcription is induced during stationary phase ditrans,polycis-polyprenyl diphosphate synthase
YMR219W	1.69177	2.22046e-14	1.52237e-12	42.45	42.715	11.985	15.186	No	ESC1	Protein involved in telomeric silencing; required for quiescent cell telomere hypercluster localization at nuclear membrane vicinity; interacts with PAD4-domain of Sir4p Esc1p
YMR269W	1.67877	1.04043e-10	3.43694e-09	41.148	33.485	9.951	14.018	No	TMA23	Nucleolar protein implicated in ribosome biogenesis; deletion extends chronological lifespan Tma23p
YML066C	1.66268	3.76157e-20	5.78787e-18	63.412	66.077	20.686	21.511	No	SMA2	Meiosis-specific prospore membrane protein; required to produce bending force necessary for proper assembly of the prospore membrane during sporulation Sma2p
YMR211W	1.63003	9.61462e-17	1.00387e-14	69.417	64.37	20.171	24.468	No	DML1	Essential protein involved in mtDNA inheritance; may also function in the partitioning of the mitochondrial organelle or in the segregation of chromosomes, exhibits regions similar to members of a GTPase family Dml1p
YLR256W-A	1.61707	2.13722e-18	2.45026e-16	74.337	74.779	27.279	22.923	No	YLR256W-A	Retrotransposon TYA Gag gene co-transcribed with TYB Pol; translated as TYA or TYA-TYB polyprotein; Gag is a nucleocapsid protein that is the structural constituent of virus-like particles (VLPs); similar to retroviral Gag gag protein
YMR014W	1.60905	6.23518e-07	9.77401e-06	17.871	13.967	4.595	6.192	No	BUD22	Protein required for rRNA maturation and ribosomal subunit biogenesis; required for 18S rRNA maturation; also required for small ribosomal subunit biogenesis; cosediments with pre-ribosomal particles; mutation decreases efficiency of +1 Ty1 frameshifting and transposition, and affects budding pattern Bud22p
YMR187C	1.60656	1.86769e-15	1.58266e-13	42.078	44.18	14.362	14.83	No	YMR187C	hypothetical protein; YMR187C is not an essential gene hypothetical protein
YML015C	1.58653	3.48237e-15	2.8678e-13	47.619	49.445	15.429	17.898	No	TAF11	TFIID subunit (40 kDa); involved in RNA polymerase II transcription initiation, similar to histone H3 with atypical histone fold motif of Spt3-like transcription factors Taf11p
YNL332W	1.5832	0.000281786	0.00230434	6.284	6.344	2.439	1.957	No	THI12	Protein involved in synthesis of the thiamine precursor HMP; member of a subtelomeric gene family including THI5, THI11, THI12, and THI13; hydroxymethylpyrimidine is also known as HMP 4-amino-5-hydroxymethyl-2-methylpyrimidine phosphate synthase
YMR044W	1.57325	2.62915e-18	2.95628e-16	96.229	100.96	30.918	37.442	No	IOC4	Member of a complex (Isw1b) with Isw1p and Ioc2p; interacts directly with H3K36me3 nucleosomes through its PWWP domain to recruit the Isw1b complex to open reading frames in a Set2p-dependent manner; Isw1b exhibits nucleosome-stimulated ATPase activity and acts within coding regions to coordinate transcription elongation with termination and processing Ioc4p
YMR251W	1.56724	5.53005e-17	5.87894e-15	59.329	57.838	19.448	21.378	No	GTO3	Omega class glutathione transferase; putative cytosolic localization omega-class glutathione transferase
YMR169C	1.56317	6.01798e-13	3.08659e-11	385.062	468.068	177.863	120.174	No	ALD3	Cytoplasmic aldehyde dehydrogenase; involved in beta-alanine synthesis; uses NAD+ as the preferred coenzyme; very similar to Ald2p; expression is induced by stress and repressed by glucose aldehyde dehydrogenase (NAD(+)) ALD3
YML003W	1.55946	6.18914e-09	1.48921e-07	24.745	30.18	8.211	11.039	No	YML003W	hypothetical protein
YMR185W	1.55587	1.38093e-07	2.47678e-06	17.313	16.302	5.122	6.681	No	RTP1	Protein required for the nuclear import and biogenesis of RNA pol II; conflicting evidence on whether null mutant is viable with elongated buds, or inviable; interacts with Rpb2, Rpb3, Nup116p, Nup100p and components of the R2TP complex (Rvb1p, Rvb2p, Pih1p); similar to human TMCO7 gene Rtp1p
YNL142W	1.55506	5.6365e-11	1.97345e-09	118.431	79.339	31.997	37.531	No	MEP2	Ammonium permease involved in regulation of pseudohyphal growth; belongs to a ubiquitous family of cytoplasmic membrane proteins that transport only ammonium (NH4+); expression is under the nitrogen catabolite repression regulation ammonium permease MEP2
YKR039W	1.54601	0.0036372	0.0207278	238.31	154.426	47.928	90.858	No	GAP1	General amino acid permease; Gap1p senses the presence of amino acid substrates to regulate localization to the plasma membrane when needed; essential for invasive growth amino acid permease GAP1
YML053C	1.54578	1.14125e-19	1.66822e-17	82.482	90.507	30.833	30.282	No	YML053C	hypothetical protein; green fluorescent protein (GFP)-fusion protein localizes to the cytoplasm and the nucleus; overexpression causes a cell cycle delay or arrest; YML053C is not an essential gene hypothetical protein
YMR039C	1.54081	1.35264e-21	2.47153e-19	149.543	149.282	49.153	56.807	No	SUB1	Transcriptional regulator; facilitates elongation through factors that modify RNAP II; role in peroxide resistance involving Rad2p; role in nonhomologous end-joining (NHEJ) of ds breaks in plasmid DNA, but not chromosomal DNA; role in the hyperosmotic stress response through polymerase recruitment at RNAP II and RNAP III genes; negatively regulates sporulation; protein abundance increases in resp…
YML093W	1.53046	3.47225e-07	5.72722e-06	24.311	18.824	6.336	8.982	No	UTP14	Subunit of U3-containing Small Subunit (SSU) processome complex; involved in production of 18S rRNA and assembly of small ribosomal subunit Utp14p
YML055W	1.52945	4.12895e-24	1.09736e-21	255.054	266.698	87.289	99.218	No	SPC2	Subunit of signal peptidase complex; complex catalyzes cleavage of N-terminal signal sequences of proteins targeted to the secretory pathway; homologous to mammalian SPC25; other members of the complex are Spc1p, Spc1p, and Sec11p signal peptidase complex subunit SPC2
YML097C	1.52055	1.46762e-11	6.04308e-10	50.595	50.535	15.294	21.066	No	VPS9	Guanine nucleotide exchange factor (GEF) and ubiquitin receptor; involved in vesicle-mediated vacuolar transport, including Golgi-endosome trafficking and sorting through the multivesicular body (MVB); stimulates the intrinsic guanine nucleotide exchange activity of Rab family members (Vps21p/Ypt52p/Ypt53p); partially redundant with GEF MUK1; required for localization of the CORVET complex to end…
YMR030W	1.49552	4.22118e-15	3.38099e-13	55.825	62.751	20.833	22.512	No	RSF1	Protein required for respiratory growth; localized to both the nucleus and mitochondrion; may interact with transcription factors to mediate the transition to respiratory growth and activate transcription of nuclear and mitochondrial genes Rsf1p
YMR321C	1.48984	3.36498e-06	4.41144e-05	33.365	19.661	8.774	10.694	No	YMR321C	hypothetical protein; proposed to be a palmitoylated membrane protein; YMR321C has a paralog, SAM4, that arose from a single-locus duplication hypothetical protein
YMR271C	1.48843	3.4381e-27	1.05803e-24	642.473	710.49	243.584	253.954	No	URA10	Minor orotate phosphoribosyltransferase (OPRTase) isozyme; catalyzes the fifth enzymatic step in the de novo biosynthesis of pyrimidines, converting orotate into orotidine-5'-phosphate; URA10 has a paralog, URA5, that arose from the whole genome duplication orotate phosphoribosyltransferase URA10
YHR214C-C	1.47577	1.50254e-08	3.3532e-07	50.451	36.613	13.835	18.487	No	YHR214C-C	Retrotransposon TYA Gag gene co-transcribed with TYB Pol; translated as TYA or TYA-TYB polyprotein; Gag is a nucleocapsid protein that is the structural constituent of virus-like particles (VLPs); similar to retroviral Gag gag protein
YMR031C	1.47223	6.24011e-16	5.79142e-14	154.349	176.158	54.753	68.18	No	EIS1	Component of the eisosome required for proper eisosome assembly; similar to Uso1p; authentic, non-tagged protein is detected in a phosphorylated state in highly purified mitochondria in high-throughput studies; protein increases in abundance and relocalizes from plasma membrane to cytoplasm upon DNA replication stress; EIS1 has a paralog, YKL050C, that arose from the whole genome duplication Eis1p
YMR181C	1.46914	1.05304e-18	1.28273e-16	529.272	671.278	223.009	224.428	No	YMR181C	hypothetical protein; mRNA transcribed as part of a bicistronic transcript with a predicted transcriptional repressor RGM1/YMR182C; mRNA is destroyed by nonsense-mediated decay (NMD); not an essential gene; YMR181C has a paralog, YPL229W, that arose from the whole genome duplication hypothetical protein
YMR233W	1.46443	8.33672e-13	4.20214e-11	49.665	56.373	18.149	21.489	No	TRI1	Non-essential sumoylated hypothetical protein; similar to components of human SWI/SNF complex including SMRD3; green fluorescent protein (GFP)-fusion protein localizes to the cytoplasm, nucleus and nucleolus; TRI1 has a paralog, UAF30, that arose from the whole genome duplication Tri1p
YMR028W	1.46282	3.25154e-13	1.79356e-11	69.014	66.242	22.218	28.415	No	TAP42	Essential protein involved in the TOR signaling pathway; physically associates with the protein phosphatase 2A and the SIT4 protein phosphatase catalytic subunits Tap42p
YML062C	1.4612	1.55153e-10	4.85831e-09	55.205	55.999	17.132	24.457	No	MFT1	Subunit of the THO complex; THO is a nuclear complex comprised of Hpr1p, Mft1p, Rlr1p, and Thp2p, that is involved in transcription elongation and mitotic recombination; involved in telomere maintenance Mft1p
YMR137C	1.45828	2.67012e-08	5.55593e-07	20.528	19.782	7.095	8.015	No	PSO2	Nuclease required for DNA single- and double-strand break repair; acts at a post-incision step in repair of breaks that result from interstrand cross-links produced by a variety of mono- and bi-functional psoralen derivatives; induced by UV-irradiation; forms nuclear foci upon DNA replication stress Pso2p
snR86	1.45592	1.38176e-08	3.09546e-07	305.515	288.177	80.341	142.796	No	snR86	- -
YML074C	1.45249	5.50138e-28	1.89215e-25	546.409	518.339	203.72	197.869	No	FPR3	Nucleolar peptidyl-prolyl cis-trans isomerase (PPIase); FK506 binding protein; affects expression of multiple genes via its role in nucleosome assembly; phosphorylated by casein kinase II (Cka1p-Cka2p-Ckb1p-Ckb2p) and dephosphorylated by Ptp1p; PPIase domain acts as a transcriptional repressor when tethered to DNA by lexA, and repressor activity is dependent on PPIase activity; FPR3 has a paralog…
YMR029C	1.4498	2.30457e-19	3.20829e-17	151.724	172.324	58.638	63.744	No	FAR8	Protein involved in recovery from arrest in response to pheromone; acts in a cell cycle arrest recovery pathway independent from Far1p; interacts with Far3p, Far7p, Far9p, Far10p, and Far11p Far8p
YML094W	1.44708	1.33357e-12	6.60795e-11	221.968	207.12	66.934	95.338	No	GIM5	Subunit of the heterohexameric cochaperone prefoldin complex; prefoldin binds specifically to cytosolic chaperonin and transfers target proteins to it; prefoldin complex also localizes to chromatin of actively transcribed genes in the nucleus and facilitates transcriptional elongation Gim5p
YML058W	1.43056	3.77423e-16	3.67799e-14	2544.78	2538.32	835.995	1109.44	No	SML1	Ribonucleotide reductase inhibitor; involved in regulating dNTP production; regulated by Mec1p and Rad53p during DNA damage and S phase; SML1 has a paralog, DIF1, that arose from the whole genome duplication ribonucleotide reductase inhibiting protein SML1
YMR128W	1.43049	2.08959e-06	2.88156e-05	19.618	15.773	5.858	7.704	No	ECM16	Essential DEAH-box ATP-dependent RNA helicase specific to U3 snoRNP; predominantly nucleolar in distribution; required for 18S rRNA synthesis ATP-dependent RNA helicase ECM16
YMR311C	1.4194	2.49149e-22	5.42495e-20	395.708	405.824	144.506	164.697	No	GLC8	Regulatory subunit of protein phosphatase 1 (Glc7p); involved in glycogen metabolism and chromosome segregation; proposed to regulate Glc7p activity via conformational alteration; ortholog of the mammalian protein phosphatase inhibitor 2; protein abundance increases in response to DNA replication stress Glc8p
YDR210W-B	1.41595	1.02668e-05	0.00012006	31.205	27.382	7.818	14.785	No	YDR210W-B	Retrotransposon TYA Gag and TYB Pol genes; transcribed/translated as one unit; polyprotein is processed to make a nucleocapsid-like protein (Gag), reverse transcriptase (RT), protease (PR), and integrase (IN); similar to retroviral genes gag-pol fusion protein
YML034W	1.41384	9.64297e-14	5.6952e-12	68.487	72.146	24.644	29.793	No	SRC1	Inner nuclear membrane protein; highly enriched at telomeres and subtelomeric regions; functions in regulation of subtelomeric genes and is linked to TREX (transcription export) factors; SRC1 produces 2 splice variant proteins with different functions; alternative splicing of SRC1 pre-mRNA is promoted by Hub1p; mutant has aneuploidy tolerance; SEC1 has a paralog, HEH2, that arose from the whole g…
YMR218C	1.4138	2.8474e-09	7.23858e-08	42.554	39.972	13.321	18.61	No	TRS130	Component of transport protein particle (TRAPP) complex II; TRAPPII is a multimeric guanine nucleotide-exchange factor for the GTPase Ypt1p, regulating intra-Golgi and endosome-Golgi traffic transport protein particle complex II subunit TRS130
YBR302C	1.41205	6.81851e-22	1.32893e-19	281.473	315.284	112.828	118.484	No	COS2	Endosomal protein involved in turnover of plasma membrane proteins; member of the DUP380 subfamily of conserved, often subtelomeric COS genes; required for the multivesicular vesicle body sorting pathway that internalizes plasma membrane proteins for degradation; Cos proteins provide ubiquitin in trans for nonubiquitinated cargo proteins Cos2p
YML132W	1.41205	6.81851e-22	1.32893e-19	281.473	315.284	112.828	118.484	No	COS3	Endosomal protein involved in turnover of plasma membrane proteins; member of the DUP380 subfamily of conserved, often subtelomeric COS genes; required for the multivesicular vesicle body sorting pathway that internalizes plasma membrane proteins for degradation; Cos proteins provide ubiquitin in trans for nonubiquitinated cargo proteins Cos3p
YML129C	1.40824	3.87663e-24	1.07936e-21	602.824	672.027	243.327	252.242	No	COX14	Mitochondrial cytochrome c oxidase (complex IV) assembly factor; also involved in translational regulation of Cox1p and prevention of Cox1p aggregation before assembly; associates with complex IV assembly intermediates and complex III/complex IV supercomplexes; located in the mitochondrial membrane Cox14p
YMR255W	1.40555	2.60851e-20	4.23666e-18	189.771	186.181	69.03	77.407	No	GFD1	Coiled-coiled hypothetical protein; identified as a high-copy suppressor of a dbp5 mutation; protein abundance increases in response to DNA replication stress Gfd1p
YMR291W	1.40171	7.17888e-14	4.56249e-12	160.138	169.35	73.454	55.284	No	TDA1	Protein kinase of unknown cellular role; green fluorescent protein (GFP)-fusion protein localizes to the cytoplasm and nucleus; null mutant is sensitive to expression of the top1-T722A allele; not an essential gene; relocalizes from nucleus to cytoplasm upon DNA replication stress protein kinase TDA1
YMR081C	1.40158	7.94204e-21	1.32677e-18	391.129	449.332	170.645	157.626	No	ISF1	Serine-rich, hydrophilic protein; overexpression suppresses growth defects of hap2, hap3, and hap4 mutants; expression is under glucose control; cotranscribed with NAM7 in a cyp1 mutant; ISF1 has a paralog, MBR1, that arose from the whole genome duplication Isf1p
YMR256C	1.39573	7.6332e-29	3.18795e-26	1342.87	1372.13	541.946	522.938	No	COX7	Subunit VII of cytochrome c oxidase (Complex IV); Complex IV is the terminal member of the mitochondrial inner membrane electron transport chain cytochrome c oxidase subunit VII
YML071C	1.38778	9.06412e-12	3.86846e-10	51.96	47.859	17.977	21.411	No	COG8	Component of the conserved oligomeric Golgi complex; a cytosolic tethering complex (Cog1p through Cog8p) that functions in protein trafficking to mediate fusion of transport vesicles to Golgi compartments Golgi transport complex subunit COG8
YMR138W	1.381	1.54412e-12	7.34023e-11	84.591	86.487	29.497	38.264	No	CIN4	GTP-binding protein involved in beta-tubulin (Tub2p) folding; isolated as mutant with increased chromosome loss and sensitivity to benomyl; regulated by the GTPase-activating protein, Cin2p, the human retinitis pigmentosa 2 (RP2) homolog Arf family GTPase CIN4
YDR034C-D	1.37828	8.14362e-06	9.79748e-05	40.507	35.038	10.38	19.499	No	YDR034C-D	Retrotransposon TYA Gag and TYB Pol genes; transcribed/translated as one unit; polyprotein is processed to make a nucleocapsid-like protein (Gag), reverse transcriptase (RT), protease (PR), and integrase (IN); similar to retroviral genes gag-pol fusion protein
YML004C	1.37791	3.26319e-20	5.15671e-18	1034.46	1226.98	461.875	436.093	No	GLO1	Monomeric glyoxalase I; catalyzes the detoxification of methylglyoxal (a by-product of glycolysis) via condensation with glutathione to produce S-D-lactoylglutathione; expression regulated by methylglyoxal levels and osmotic stress lactoylglutathione lyase GLO1
YMR164C	1.37787	2.10791e-06	2.89999e-05	14.946	15.828	6.666	5.581	Yes	MSS11	Transcription factor; involved in regulation of invasive growth and starch degradation; controls the activation of FLO11 and STA2 in response to nutritional signals; forms a heterodimer with Flo8p that interacts with the Swi/Snf complex during transcriptional activation of FLO1, FLO11, and STA1 Mss11p
YER187W	1.37624	1.62351e-09	4.29532e-08	36.218	30.158	13.48	12.918	No	YER187W	hypothetical protein; induced in respiratory-deficient cells hypothetical protein
YMR115W	1.36831	1.50918e-13	8.65138e-12	56.332	61.164	22.671	24.313	No	MGR3	Subunit of the mitochondrial (mt) i-AAA protease supercomplex; i-AAA degrades misfolded mitochondrial proteins; forms a subcomplex with Mgr1p that binds to substrates to facilitate proteolysis; required for growth of cells lacking mtDNA Mgr3p
YMR173W	1.36226	3.83758e-21	6.5995e-19	2117.06	2417.78	954.104	866.261	No	DDR48	DNA damage-responsive protein; expression is increased in response to heat-shock stress or treatments that produce DNA lesions; contains multiple repeats of the amino acid sequence NNNDSYGS; protein abundance increases in response to DNA replication stress DNA damage-responsive protein 48
YML037C	1.36193	0.000272384	0.00223998	12.135	8.933	3.529	4.925	No	YML037C	hypothetical protein; has some characteristics of a transcriptional activator; may be a target of Dbf2p-Mob1p kinase; GFP-fusion protein co-localizes with clathrin-coated vesicles; YML037C is not an essential gene hypothetical protein
YML105C	1.35903	7.92479e-10	2.17541e-08	178.319	166.828	55.146	83.621	No	SEC65	Subunit of the signal recognition particle (SRP); involved in protein targeting to the ER; interacts with Srp54p; homolog of mammalian SRP19 RNA-binding signal recognition particle subunit SEC65
YML128C	1.34486	1.50922e-13	8.65138e-12	676.985	804.875	339.525	262.636	No	MSC1	hypothetical protein; mutant is defective in directing meiotic recombination events to homologous chromatids; the authentic, non-tagged protein is detected in highly purified mitochondria and is phosphorylated Msc1p
YMR253C	1.34219	1.24555e-15	1.10345e-13	89.687	85.066	34.227	36.886	No	YMR253C	hypothetical protein; green fluorescent protein (GFP)-fusion protein localizes to the cytoplasm in a punctate pattern; YMR253C is not an essential gene hypothetical protein
YMR227C	1.34195	5.26458e-08	1.03993e-06	48.631	41.47	15.024	21.6	No	TAF7	TFIID subunit (67 kDa); involved in RNA polymerase II transcription initiation Taf7p
YML131W	1.34156	8.77518e-20	1.3156e-17	157.864	166.663	67.143	65.045	No	YML131W	hypothetical protein; similar to medium chain dehydrogenase/reductases; expression induced by stresses including osmotic shock, DNA damaging agents, and other chemicals; GFP-fusion protein localizes to the cytoplasm; protein abundance increases in response to DNA replication stress hypothetical protein
YPL187W	1.33988	3.92178e-05	0.000407294	13.427	12.546	4.424	6.148	No	MF(ALPHA)1	Mating pheromone alpha-factor, made by alpha cells; interacts with mating type a cells to induce cell cycle arrest and other responses leading to mating; also encoded by MF(ALPHA)2, although MF(ALPHA)1 produces most alpha-factor; binds copper(II) ions Mf(alpha)1p
YMR059W	1.33396	1.03867e-14	7.59135e-13	125.884	127.341	46.825	56.807	No	SEN15	Subunit of the tRNA splicing endonuclease; tRNA splicing endonuclease (Sen complex) is composed of Sen2p, Sen15p, Sen34p, and Sen54p; Sen complex also cleaves the CBP1 mRNA at the mitochondrial surface Sen15p
YML100W	1.33107	1.0313e-10	3.42614e-09	591.826	736.738	317.945	227.129	No	TSL1	Large subunit of trehalose 6-phosphate synthase/phosphatase complex; Tps1p-Tps2p complex converts uridine-5'-diphosphoglucose and glucose 6-phosphate to trehalose; contributes to survival to acute lethal heat stress; mutant has aneuploidy tolerance; protein abundance increases in response to DNA replication stress; TSL1 has a paralog, TPS3, that arose from the whole genome duplication trehalose 6…
YOL084W	1.32468	5.76874e-09	1.3938e-07	50.916	50.888	24.595	17.353	No	PHM7	hypothetical protein; expression is regulated by phosphate levels; green fluorescent protein (GFP)-fusion protein localizes to the cell periphery and vacuole; protein abundance increases in response to DNA replication stress Phm7p
YMR022W	1.3181	9.82695e-22	1.85349e-19	523.804	578.732	232.285	224.016	No	UBC7	Ubiquitin conjugating enzyme; involved in the ER-associated protein degradation (ERAD) pathway and in the inner nuclear membrane-associated degradation (INMAD) pathway; requires Cue1p for recruitment to the ER membrane; proposed to be involved in chromatin assembly E2 ubiquitin-conjugating protein UBC7
YMR147W	1.31794	1.02112e-07	1.85997e-06	23.05	21.941	9.914	8.738	No	YMR147W	hypothetical protein; SWAT-GFP and mCherry fusion proteins localize to the cell periphery hypothetical protein
YMR244C-A	1.31433	7.2416e-09	1.70943e-07	310.766	329.658	102.742	162.873	No	COA6	Protein involved in cytochrome c oxidase (Complex IV) assembly; involved in delivery of copper to Complex IV; also required for efficient formation of respiratory supercomplexes comprised of Complexes III and IV; localizes to the mitochondrial intermembrane space; ortholog implicated in cardiac defects in zebrafish and human; transcription is induced in response to the DNA-damaging agent MMS; pro…
YML028W	1.30863	1.66562e-25	4.86944e-23	5410.9	5765.21	2323.95	2331.91	No	TSA1	Thioredoxin peroxidase; acts as both ribosome-associated and free cytoplasmic antioxidant; self-associates to form high-molecular weight chaperone complex under oxidative stress; chaperone activity essential for growth in zinc deficiency; required for telomere length maintenance; binds and modulates Cdc19p activity; protein abundance increases, forms cytoplasmic foci during DNA replication stress…
YML118W	1.30543	2.86107e-11	1.10057e-09	48.053	44.731	18.578	20.088	No	NGL3	3'-5' exonuclease specific for poly-A RNAs; has a domain similar to a magnesium-dependent endonuclease motif in mRNA deadenylase Ccr4p; similar to Ngl1p; NGL3 has a paralog, NGL2, that arose from the whole genome duplication 3'-5' poly(A) RNA exonuclease
YML095C	1.29844	2.5243e-07	4.35386e-06	46.616	49.059	15.698	24.39	No	RAD10	Single-stranded DNA endonuclease (with Rad1p); cleaves single-stranded DNA during nucleotide excision repair and double-strand break repair; subunit of Nucleotide Excision Repair Factor 1 (NEF1); homolog of human ERCC1 protein Rad10p
YMR301C	1.29367	3.30149e-11	1.24541e-09	50.771	47.638	21.972	19.488	No	ATM1	Mitochondrial inner membrane ATP-binding cassette (ABC) transporter; exports mitochondrially synthesized precursors of iron-sulfur (Fe/S) clusters to the cytosol; human homolog ABCB7 can complement yeast null mutant ATP-binding cassette Fe/S cluster precursor transporter ATM1
YMR262W	1.28704	3.74362e-19	4.86421e-17	245.958	260.695	103.036	111.191	No	YMR262W	hypothetical protein; interacts weakly with Knr4p; YMR262W is not an essential gene putative endodeoxyribonuclease
YMR197C	1.27999	8.59466e-14	5.23468e-12	166.226	179.77	66.138	80.853	No	VTI1	Protein involved in cis-Golgi membrane traffic; v-SNARE that interacts with two t-SNARES, Sed5p and Pep12p; required for multiple vacuolar sorting pathways; human homolog VTI1A can complement yeast null mutant v-SNARE protein VTI1
YMR097C	1.27838	1.44253e-10	4.609e-09	83.02	84.912	30.771	40.654	No	MTG1	Putative GTPase peripheral to the mitochondrial inner membrane; essential for respiratory competence, likely functions in assembly of the large ribosomal subunit, has homologs in plants and animals putative GTPase MTG1
YML014W	1.27728	9.03354e-14	5.44527e-12	80.374	73.743	32.756	32.817	No	TRM9	tRNA methyltransferase; catalyzes modification of wobble bases in tRNA anticodons to 2, 5-methoxycarbonylmethyluridine and 5-methoxycarbonylmethyl-2-thiouridine; may act as part of a complex with Trm112p; deletion mutation increases translational infidelity, including amino acid misincorporation and -1 frameshifting, and also confers resistance to zymocin; null mutant displays activation of stres…
YML108W	1.2675	1.70007e-11	6.95128e-10	69.262	66.44	26.384	31.761	No	YML108W	hypothetical protein; structure defines a new subfamily of the split beta-alpha-beta sandwiches; green fluorescent protein (GFP)-fusion protein localizes to the cytoplasm and nucleus; YML108W is not an essential gene; relative distribution to the nucleus increases upon DNA replication stress hypothetical protein
YML012W	1.25838	7.66193e-23	1.86664e-20	1029.6	1091.71	461.299	453.825	No	ERV25	Member of the p24 family involved in ER to Golgi transport; role in misfolded protein quality control; forms a heterotrimeric complex with Erp1, Erp2p, and Emp24 Erv25p
YMR049C	1.25805	1.13208e-07	2.05568e-06	34.378	28.44	12.5	14.619	No	ERB1	Constituent of 66S pre-ribosomal particles; forms a complex with Nop7p and Ytm1p that is required for maturation of the large ribosomal subunit; required for maturation of the 25S and 5.8S ribosomal RNAs; homologous to mammalian Bop1 Erb1p
YMR228W	1.2563	4.32689e-10	1.25492e-08	42.078	41.107	16.948	18.932	No	MTF1	Mitochondrial RNA polymerase specificity factor; has structural similarity to S-adenosylmethionine-dependent methyltransferases and functional similarity to bacterial sigma-factors; Mtf1p interacts with and stabilizes the Rpo41p-promoter complex, enhancing DNA bending and melting to facilitate pre-initiation open complex formation RNA polymerase specificity factor
YMR061W	1.25041	5.87203e-13	3.03839e-11	66.441	66.958	28.136	29.715	No	RNA14	Component of the cleavage and polyadenylation factor I (CF I); CF 1, composed of the CF 1A complex (Rna14p, Rna15p, Clp1p, Pcf11p) and Hrp1, is involved in cleavage and polyadenylation of mRNA 3' ends; bridges interaction between Rna15p and Hrp1p in the CF I complex; mutant displays reduced transcription elongation in the G-less-based run-on (GLRO) assay; required for gene looping and maintenance…
YMR268C	1.24892	3.00695e-05	0.000319085	15.608	14.385	5.662	7.326	No	PRP24	Splicing factor that reanneals snRNPs during spliceosome recycling; reanneals U4 and U6 snRNPs U6 snRNP complex subunit PRP24
YMR072W	1.24158	5.40847e-22	1.12941e-19	500.372	503.051	219.406	218.569	No	ABF2	Mitochondrial DNA-binding protein; involved in mitochondrial DNA replication and recombination, member of HMG1 DNA-binding protein family; activity may be regulated by protein kinase A phosphorylation; ABF2 has a paralog, IXR1, that arose from the whole genome duplication; human homolog TFAM can complement yeast abf2 mutant, rescuing the loss-of-mitochondrial DNA phenotype in a yeast abf2 strain …
YMR139W	1.23399	1.52936e-16	1.54176e-14	179.156	199.332	83.111	82.965	No	RIM11	Protein kinase; required for signal transduction during entry into meiosis; promotes the formation of the Ime1p-Ume6p complex by phosphorylating Ime1p and Ume6p; shares similarity with mammalian glycogen synthase kinase 3-beta; protein abundance increases in response to DNA replication stress; RIM11 has a paralog, MRK1, that arose from the whole genome duplication serine/threonine protein kinase …
YMR027W	1.23292	8.54417e-19	1.06293e-16	264.088	281.37	122.092	117.417	No	YMR027W	A metal-dependent phosphatase, part of the DUF89 protein family; dephosphorylates fructose-1-phosphate; human ortholog, C6orf211 is involved in response to DNA damage; green fluorescent protein (GFP)-fusion protein localizes to the nucleus and cytoplasm; YMR027W is not an essential gene putative methyltransferase
YML120C	1.23288	3.15545e-16	3.1271e-14	209.699	238.049	96.689	99.863	No	NDI1	NADH:ubiquinone oxidoreductase; transfers electrons from NADH to ubiquinone in respiratory chain but does not pump protons, in contrast to higher eukaryotic multisubunit respiratory complex I; upon apoptotic stress, is activated in mitochondria by N-terminal cleavage, then translocates to cytoplasm to induce apoptosis; homolog of human AIFM2; yeast NDI1 complements several phenotypes of human cel…
YML009C	1.23241	2.0441e-18	2.39037e-16	641.129	691.6	278.093	307.159	No	MRPL39	Mitochondrial ribosomal protein of the large subunit mitochondrial 54S ribosomal protein YmL39
YML072C	1.22801	1.10742e-14	7.99393e-13	95.599	100.784	43.467	43.011	No	TCB3	Cortical ER protein involved in ER-plasma membrane tethering; one of 6 proteins (Ist2p, Scs2p, Scs22p, Tcb1p, Tcb2p, Tcb3p) that connect ER to the plasma membrane (PM) and regulate PM phosphatidylinositol-4-phosphate (PI4P) levels by controlling access of Sac1p phosphatase to its substrate PI4P in the PM; localized to the bud via specific mRNA transport; non-tagged protein detected in a phosphory…
YMR294W	1.22717	6.4498e-09	1.53927e-07	34.957	33.54	14.436	15.675	No	JNM1	Component of the yeast dynactin complex; consisting of Nip100p, Jnm1p, and Arp1p; required for proper nuclear migration and spindle partitioning during mitotic anaphase B Jnm1p
YML091C	1.22566	1.5413e-08	3.42661e-07	44.797	48.63	17.99	23.223	No	RPM2	Protein subunit of mitochondrial RNase P; has roles in nuclear transcription, cytoplasmic and mitochondrial RNA processing, and mitochondrial translation; distributed to mitochondria, cytoplasmic processing bodies, and the nucleus ribonuclease P
YML050W	1.22455	3.97792e-08	7.96876e-07	43.525	38.265	20.183	15.964	No	AIM32	hypothetical protein; null mutant is viable and displays elevated frequency of mitochondrial genome loss Aim32p
YMR299C	1.22162	4.38832e-07	7.06846e-06	103.392	93.272	33.59	53.328	No	DYN3	Dynein light intermediate chain (LIC); localizes with dynein, null mutant is defective in nuclear migration dynein light intermediate chain
YER150W	1.21868	3.84876e-10	1.13084e-08	4433.42	5116.15	2473.78	1761.95	No	SPI1	GPI-anchored cell wall protein involved in weak acid resistance; basal expression requires Msn2p/Msn4p; expression is induced under conditions of stress and during the diauxic shift; SPI1 has a paralog, SED1, that arose from the whole genome duplication Spi1p
YMR114C	1.21826	7.98462e-14	4.91432e-12	102.111	109.431	44.778	48.992	No	YMR114C	hypothetical protein; may interact with ribosomes, based on co-purification experiments; green fluorescent protein (GFP)-fusion protein localizes to the nucleus and cytoplasm; YMR114C is not an essential gene putative peptide hydrolase
YNL015W	1.21637	2.70694e-14	1.79858e-12	797.753	977.001	378.531	409.424	No	PBI2	Cytosolic inhibitor of vacuolar proteinase B (PRB1); required for efficient vacuole inheritance; with thioredoxin forms protein complex LMA1, which assists in priming SNARE molecules and promotes vacuole fusion; protein abundance increases in response to DNA replication stress Pbi2p
YMR090W	1.20716	9.7954e-15	7.24984e-13	430.799	465.149	218.119	182.361	No	YMR090W	hypothetical protein; similar to DTDP-glucose 4,6-dehydratases; GFP-fusion protein localizes to the cytoplasm; up-regulated in response to the fungicide mancozeb; not essential for viability hypothetical protein
YMR239C	1.20177	0.000175823	0.00153439	14.564	14.033	5.098	7.671	No	RNT1	Nuclear dsRNA-specific ribonuclease (RNase III); involved in rDNA transcription, rRNA processing and U2 snRNA 3' end formation by cleavage of a stem-loop structure at the 3' end of U2 snRNA; involved in polyadenylation-independent transcription termination; involved in the cell wall stress response, regulating the degradation of cell wall integrity and morphogenesis checkpoint genes ribonuclease …
YMR316C-A	1.2009	4.72921e-13	2.53685e-11	107.527	100.707	49.557	43.901	No	YMR316C-A	hypothetical protein; SWAT-GFP and mCherry fusion proteins localize to the endoplasmic reticulum; mRNA identified as translated by ribosome profiling data; overlaps the verified gene DIA1/YMR316W hypothetical protein
YMR215W	1.2006	5.54386e-11	1.95271e-09	145.491	179.682	78.993	67.057	No	GAS3	Putative 1,3-beta-glucanosyltransferase; has similarity go other GAS family members; low abundance, possibly inactive member of the GAS family of GPI-containing proteins; localizes to the cell wall; mRNA induced during sporulation putative 1,3-beta-glucanosyltransferase
YMR213W	1.19719	6.29342e-08	1.21444e-06	46.482	44.29	17.549	23.29	No	CEF1	Essential splicing factor; associated with Prp19p and the spliceosome, contains an N-terminal c-Myb DNA binding motif necessary for cell viability but not for Prp19p association, evolutionarily conserved and homologous to S. pombe Cdc5p Cef1p
YML110C	1.19137	8.42333e-18	9.29269e-16	449.229	497.499	211.306	216.423	No	COQ5	2-hexaprenyl-6-methoxy-1,4-benzoquinone methyltransferase; involved in ubiquinone (Coenzyme Q) biosynthesis; localizes to the matrix face of the mitochondrial inner membrane in a large complex with other ubiquinone biosynthetic enzymes; respiratory defect of the null mutant is partially complemented by human COQ5 2-hexaprenyl-6-methoxy-1,4-benzoquinone methyltransferase
YMR036C	1.19126	2.8089e-07	4.80224e-06	25.778	24.397	11.434	11.273	No	MIH1	Protein tyrosine phosphatase involved in cell cycle control; regulates the phosphorylation state of Cdc28p; homolog of S. pombe cdc25 putative tyrosine protein phosphatase MIH1
YMR004W	1.19079	5.65629e-13	2.95288e-11	81.097	84.978	36.617	38.431	No	MVP1	Protein required for sorting proteins to the vacuole; Mvp1p and Vps1p act in concert to promote membrane traffic to the vacuole; participates in transcription initiation and/or early elongation of specific genes; interacts with 'foot domain' of RNA polymerase II; deletion results in abnormal CTD-Ser5 phosphorylation of RNA polymerase II at specific promoter regions; protein abundance increases in…
YML088W	1.18925	8.89201e-09	2.04251e-07	36.807	35.236	15.71	16.875	No	UFO1	F-box receptor protein; subunit of the Skp1-Cdc53-F-box receptor (SCF) E3 ubiquitin ligase complex; binds to phosphorylated Ho endonuclease, allowing its ubiquitination by SCF and subsequent degradation SCF ubiquitin ligase complex subunit UFO1
YML065W	1.18277	2.71657e-07	4.67169e-06	30.791	27.206	12.377	13.985	No	ORC1	Largest subunit of the origin recognition complex; involved in directing DNA replication by binding to replication origins; also involved in transcriptional silencing; exhibits ATPase activity; ORC1 has a paralog, SIR3, that arose from the whole genome duplication origin recognition complex subunit 1
YLR410W-B	1.17715	5.23921e-05	0.000521005	19.432	18.439	7.022	10.261	No	YLR410W-B	Retrotransposon TYA Gag and TYB Pol genes; transcribed/translated as one unit; polyprotein is processed to make a nucleocapsid-like protein (Gag), reverse transcriptase (RT), protease (PR), and integrase (IN); similar to retroviral genes gag-pol fusion protein
YMR193W	1.1723	1.99712e-07	3.52783e-06	76.301	72.157	27.561	40.321	No	MRPL24	Mitochondrial ribosomal protein of the large subunit; two mitochondrial ribosomal proteins, YmL14 and YmL24, have been assigned to the same gene mitochondrial 54S ribosomal protein YmL24/YmL14
YMR207C	1.16939	0.000136975	0.00123977	13.344	11.907	5.49	6.125	No	HFA1	Mitochondrial acetyl-coenzyme A carboxylase; catalyzes production of malonyl-CoA in mitochondrial fatty acid biosynthesis; relocalizes from mitochondrion to cytoplasm upon DNA replication stress; genetic and comparative analysis suggests that translation begins at a non-canonical (Ile) start codon at -372 relative to the annotated start codon acetyl-CoA carboxylase HFA1
YMR264W	1.16901	3.60453e-15	2.92718e-13	336.792	339.164	144.077	165.986	No	CUE1	Ubiquitin-binding protein; ER membrane protein that recruits and integrates the ubiquitin-conjugating enzyme Ubc7p into ER membrane-bound ubiquitin ligase complexes that function in the ER-associated degradation (ERAD) pathway for misfolded proteins; contains a CUE domain that binds ubiquitin to facilitate intramolecular monoubiquitination and to promote diubiquitin elongation, facilitating polyu…
YML030W	1.16792	4.23937e-11	1.52071e-09	176.892	176.642	71.469	90.825	No	RCF1	Cytochrome c oxidase subunit; required for assembly of the Complex III-Complex IV supercomplex, and for assembly of Cox13p and Rcf2p into cytochrome c oxidase; similar to Rcf2p, and either Rcf1p or Rcf2p is required for late-stage assembly of the Cox12p and Cox13p subunits and for cytochrome c oxidase activity; required for growth under hypoxic conditions; member of the hypoxia induced gene famil…
YMR125W	1.16648	9.65594e-08	1.77542e-06	67.877	63.973	25.208	35.296	No	STO1	Large subunit of the nuclear mRNA cap-binding protein complex; interacts with Npl3p to carry nuclear poly(A)+ mRNA to cytoplasm; also involved in nuclear mRNA degradation and telomere maintenance; orthologous to mammalian CBP80 Sto1p
YMR066W	1.16207	6.90934e-06	8.39961e-05	19.866	19.804	8.345	9.972	No	SOV1	Mitochondrial hypothetical protein Sov1p
YMR229C	1.15916	1.30907e-05	0.000149203	24.476	19.551	9.35	10.983	No	RRP5	RNA binding protein involved in synthesis of 18S and 5.8S rRNAs; component of ribosomal small subunit (SSU) processome and 90S preribosome; required for pre-rRNA packaging and compaction of processome into dense terminal balls; part of Mak21p-Noc2p-Rrp5p module that associates with nascent pre-rRNA during transcription with role in biogenesis of large ribosomal subunit; binds single stranded trac…
YMR226C	1.15801	2.11192e-19	3.01181e-17	859.47	835.572	383.715	400.119	No	YMR226C	NADP(+)-dependent serine dehydrogenase and carbonyl reductase; acts on serine, L-allo-threonine, and other 3-hydroxy acids; green fluorescent protein fusion protein localizes to the cytoplasm and nucleus; may interact with ribosomes, based on co-purification experiments oxidoreductase
YMR084W	1.15779	1.18064e-06	1.7003e-05	39.226	38.97	21.286	14.986	No	YMR084W	hypothetical protein; YMR084W and adjacent ORF YMR085W are merged in related strains, and together are paralogous to glutamine-fructose-6-phosphate amidotransferase GFA1 putative glutamine--fructose-6-phosphate transaminase
YML041C	1.15734	2.01957e-08	4.34132e-07	59.36	53.608	23.124	29.171	No	VPS71	Nucleosome-binding component of the SWR1 complex; SWR1 exchanges histone variant H2AZ (Htz1p) for chromatin-bound histone H2A; required for vacuolar protein sorting Vps71p
YML069W	1.15563	4.93594e-12	2.20309e-10	149.76	154.348	63.883	76.873	No	POB3	Subunit of the heterodimeric FACT complex (Spt16p-Pob3p); FACT associates with chromatin via interaction with Nhp6Ap and Nhp6Bp, and reorganizes nucleosomes to facilitate access to DNA by RNA and DNA polymerases; protein abundance increases in response to DNA replication stress FACT complex subunit POB3
YMR062C	1.15488	2.04157e-11	8.17605e-10	405.28	444.1	173.5	219.959	No	ARG7	Mitochondrial ornithine acetyltransferase; catalyzes the fifth step in arginine biosynthesis; also possesses acetylglutamate synthase activity, regenerates acetylglutamate while forming ornithine glutamate N-acetyltransferase
YMR316W	1.15266	3.92662e-12	1.76607e-10	227.064	196.766	105.647	91.181	No	DIA1	hypothetical protein; involved in invasive and pseudohyphal growth; green fluorescent protein (GFP)-fusion protein localizes to the cytoplasm in a punctate pattern Dia1p
YMR005W	1.15201	2.63747e-10	8.03192e-09	71.288	71.65	30.404	36.008	No	TAF4	TFIID subunit (48 kDa); involved in RNA polymerase II transcription initiation; potential Cdc28p substrate Taf4p
YML036W	1.15121	3.39366e-11	1.27197e-09	83.423	89.274	37.376	42.867	No	CGI121	Component of the EKC/KEOPS complex; EKC/KEOPS complex is required for t6A tRNA modification and telomeric TG1-3 recombination; may have role in transcription; Cgi121p is dispensable for tRNA modification; other complex members are Bud32p, Kae1p, Pcc1p, and Gon7p Cgi121p
YMR134W	1.15117	7.0005e-10	1.95847e-08	57.2	55.051	24.411	27.703	No	ERG29	hypothetical protein involved in ergosterol biosynthesis; conditional mutants produce less ergosterol, display impaired oxygen consumption, respiratory growth, mitochondrial iron utilization, and are more sensitive to oxidative stress; mutant bm-8 has a growth defect on iron-limited medium that is complemented by overexpression of Yfh1p; protein localizes to the cytoplasm, ER and nuclear envelope…
YMR295C	1.15098	2.61315e-19	3.55328e-17	668.696	654.106	312.455	302.357	No	YMR295C	hypothetical protein that associates with ribosomes; green fluorescent protein (GFP)-fusion protein localizes to the cell periphery and bud; not an essential gene; protein abundance increases in response to DNA replication stress; YMR295C has a paralog, YGR273C, that arose from the whole genome duplication hypothetical protein
YMR098C	1.15083	2.90411e-10	8.7981e-09	54.916	56.23	24.742	26.925	No	ATP25	Mitochondrial protein required for the stability of Oli1p (Atp9p) mRNA; also required for the Oli1p ring formation; YMR098C is not an essential gene Atp25p
YML068W	1.14605	8.9314e-12	3.83984e-10	81.511	81.101	36.139	39.687	No	ITT1	Protein that modulates the efficiency of translation termination; interacts with translation release factors eRF1 (Sup45p) and eRF3 (Sup35p) in vitro, contains a zinc finger domain characteristic of the TRIAD class of proteins Itt1p
YML029W	1.14286	3.67414e-11	1.35111e-09	85.015	81.817	41.764	36.23	No	USA1	Scaffold subunit of the Hrd1p ubiquitin ligase; also promotes ligase oligomerization; involved in ER-associated protein degradation (ERAD); interacts with the U1 snRNP-specific protein, Snp1p Usa1p
YML010W	1.14244	3.16097e-11	1.20014e-09	74.989	69.855	32.989	34.729	No	SPT5	Spt4p/5p (DSIF) transcription elongation factor complex subunit; the Spt4/5 complex binds to ssRNA in a sequence-specific manner, and in concert with RNAP I and II has multiple roles regulating transcriptional elongation, RNA processing, quality control, and transcription-coupled repair; interacts with DNA upstream of RNAPII and the non-template strand of the transcription bubble; Spt5p is the on…
YMR201C	1.14209	7.21578e-09	1.70943e-07	40.786	41.151	18.382	19.855	No	RAD14	Protein that recognizes and binds damaged DNA during NER; subunit of Nucleotide Excision Repair Factor 1 (NEF1); contains zinc finger motif; homolog of human XPA protein; NER stands for nucleotide excision repair Rad14p
YMR183C	1.14205	9.75259e-12	4.1024e-10	96.798	111.094	49.827	47.369	No	SSO2	Plasma membrane t-SNARE; involved in fusion of secretory vesicles at the plasma membrane; syntaxin homolog that is functionally redundant with Sso1p; SSO2 has a paralog, SSO1, that arose from the whole genome duplication syntaxin
YDR077W	1.14149	5.39342e-12	2.37108e-10	3507.02	4051.56	1953.21	1583.18	No	SED1	Major stress-induced structural GPI-cell wall glycoprotein; associates with translating ribosomes, possible role in mitochondrial genome maintenance; ORF contains two distinct variable minisatellites; SED1 has a paralog, SPI1, that arose from the whole genome duplication Sed1p
YJR078W	1.13676	1.02298e-06	1.49534e-05	28.145	25.058	11.936	13.029	No	BNA2	Tryptophan 2,3-dioxygenase or indoleamine 2,3-dioxygenase; required for de novo biosynthesis of NAD from tryptophan via kynurenine; interacts genetically with telomere capping gene CDC13; regulated by Hst1p and Aftp dioxygenase BNA2
YMR186W	1.13614	1.04333e-09	2.82423e-08	1174.3	1363.66	683.278	508.642	No	HSC82	Cytoplasmic chaperone of the Hsp90 family; plays a role in determining prion variants; redundant in function and nearly identical with Hsp82p, and together they are essential; expressed constitutively at 10-fold higher basal levels than HSP82 and induced 2-3 fold by heat shock; contains two acid-rich unstructured regions that promote the solubility of chaperone-substrate complexes; HSC82 has a pa…
YMR281W	1.13584	1.29197e-12	6.45654e-11	135.806	157.113	68.564	68.947	No	GPI12	ER membrane protein involved in the second step of GPI anchor assembly; the second step is the de-N-acetylation of the N-acetylglucosaminylphosphatidylinositol intermediate; functional homolog of human PIG-Lp; GPI stands for glycosylphosphatidylinositol N-acetylglucosaminylphosphatidylinositol deacetylase
YMR178W	1.13496	1.22151e-13	7.14218e-12	188.81	214.147	92.167	97.162	No	YMR178W	hypothetical protein; green fluorescent protein (GFP)-fusion protein localizes to both the cytoplasm and nucleus; YMR178W is not an essential gene; protein abundance increases in response to DNA replication stress hypothetical protein
YML099C	1.13492	2.035e-09	5.28828e-08	51.515	47.66	24.092	22.512	Yes	ARG81	Zinc finger transcription factor involved in arginine-responsive genes; Zn(2)-Cys(6) binuclear cluster domain type; involved in the regulation of arginine-responsive genes; acts with Arg80p and Arg82p Arg81p
YMR289W	1.13437	9.0113e-11	3.04561e-09	67.102	73.248	34.19	31.716	No	ABZ2	Aminodeoxychorismate lyase (4-amino-4-deoxychorismate lyase); catalyzes the third step in para-aminobenzoic acid biosynthesis; involved in folic acid biosynthesis aminodeoxychorismate lyase ABZ2
YMR091C	1.13364	1.53914e-12	7.34023e-11	95.309	90.53	43.357	44.012	No	NPL6	Component of the RSC chromatin remodeling complex; interacts with Rsc3p, Rsc30p, Ldb7p, and Htl1p to form a module important for a broad range of RSC functions Npl6p
snR11	1.13187	3.14041e-11	1.20013e-09	562.306	617.174	245.079	310.094	No	snR11	- -
YMR287C	1.1294	4.97451e-06	6.33682e-05	22.481	21.126	9.571	10.917	No	DSS1	3'-5' exoribonuclease; component of the mitochondrial degradosome along with the ATP-dependent RNA helicase Suv3p; the degradosome associates with the ribosome and mediates turnover of aberrant or unprocessed RNAs Dss1p
YMR140W	1.12723	2.87101e-12	1.3013e-10	83.557	84.493	39.815	39.554	No	SIP5	hypothetical protein; interacts with both the Reg1p/Glc7p phosphatase and the Snf1p kinase; forms cytoplasmic foci upon DNA replication stress Sip5p
YMR234W	1.12682	1.68435e-12	7.87874e-11	96.932	93.217	43.994	45.868	No	RNH1	Ribonuclease H1; able to bind double-stranded RNAs and RNA-DNA hybrids; associates with RNAse polymerase I. RNA-DNA hybrid ribonuclease
YML114C	1.12417	2.06315e-11	8.20628e-10	71.299	73.358	34.864	33.684	No	TAF8	TFIID subunit (65 kDa); involved in RNA polymerase II transcription initiation Taf8p
YMR204C	1.12349	1.44988e-06	2.04276e-05	25.282	25.422	11.225	12.784	No	INP1	Peripheral membrane protein of peroxisomes; involved in peroxisomal inheritance; recruitment to peroxisomes is mediated by interaction with Pex3p at the peroxisomal membrane Inp1p
YMR042W	1.12155	2.34022e-11	9.1834e-10	134.835	136.031	58.43	70.014	Yes	ARG80	Transcription factor involved in regulating arginine-responsive genes; acts with Arg81p and Arg82p Arg80p
YMR286W	1.12001	4.29257e-16	4.04817e-14	425.28	467.264	209.038	214.634	No	MRPL33	Mitochondrial ribosomal protein of the large subunit mitochondrial 54S ribosomal protein YmL33
YBL100W-B	1.11973	0.000993601	0.0068348	17.003	14.264	5.441	9.338	No	YBL101W-B	Retrotransposon TYA Gag and TYB Pol genes; transcribed/translated as one unit; polyprotein is processed to make a nucleocapsid-like protein (Gag), reverse transcriptase (RT), protease (PR), and integrase (IN); similar to retroviral genes gag-pol fusion protein
YMR196W	1.11839	2.62869e-10	8.03192e-09	135.279	163.667	75.978	66.112	No	YMR196W	hypothetical protein; green fluorescent protein (GFP)-fusion protein localizes to the cytoplasm; YMR196W is not an essential gene hypothetical protein
YMR033W	1.11705	4.6083e-11	1.64297e-09	89.19	85.033	38.994	43.812	No	ARP9	Component of both the SWI/SNF and RSC chromatin remodeling complexes; actin-related protein involved in transcriptional regulation Arp9p
YJL034W	1.11131	1.37894e-17	1.49309e-15	1077.45	1120.02	544.176	505.64	No	KAR2	ATPase involved in protein import into the ER; also acts as a chaperone to mediate protein folding in the ER and may play a role in ER export of soluble proteins; regulates the unfolded protein response via interaction with Ire1p Hsp70 family ATPase KAR2
YMR153W	1.10866	2.8075e-11	1.08712e-09	77.273	76.596	38.087	35.574	No	NUP53	FG-nucleoporin component of central core of nuclear pore complex (NPC); also part of the NPC nuclear basket; contributes directly to nucleocytoplasmic transport; involved in regulation of transcription and mitosis; induces membrane tubulation, which may contribute to nuclear pore assembly; NUP53 has a paralog, ASM4, that arose from the whole genome duplication FG-nucleoporin NUP53
YMR111C	1.10829	1.17982e-06	1.7003e-05	28.61	25.499	13.051	12.862	No	YMR111C	hypothetical protein; green fluorescent protein (GFP)-fusion protein localizes to the nucleus; YMR111C is not an essential gene; forms nuclear foci upon DNA replication stress hypothetical protein
YML080W	1.10517	0.000474709	0.00367146	16.228	13.636	5.833	8.404	No	DUS1	Dihydrouridine synthase; member of a widespread family of conserved proteins including Smm1p, Dus3p, and Dus4p; modifies pre-tRNA(Phe) at U17 tRNA dihydrouridine synthase
YPR145C-A	1.10462	5.48583e-08	1.07636e-06	90.741	84.13	48.357	35.641	No	YPR145C-A	hypothetical protein
YML127W	1.10386	1.97022e-12	9.07075e-11	95.609	98.295	46.91	46.18	No	RSC9	Component of the RSC chromatin remodeling complex; DNA-binding protein involved in the synthesis of rRNA and in transcriptional repression and activation of genes regulated by the Target of Rapamycin (TOR) pathway Rsc9p
YMR092C	1.10231	1.6215e-12	7.6459e-11	119.341	125.523	61.579	56.174	No	AIP1	Actin cortical patch component; interacts with the actin depolymerizing factor cofilin; inhibits elongation of aged ADP-actin filaments decorated with cofilin to maintain a high level of assembly-competent actin species; required to restrict cofilin localization to cortical patches; putative regulator of cytokinesis; contains WD repeats; protein increases in abundance and relocalizes from cytopla…
YMR099C	1.1015	2.34905e-15	1.96213e-13	315.727	330.209	161.724	149.022	No	YMR099C	Glucose-6-phosphate 1-epimerase (hexose-6-phosphate mutarotase); likely involved in carbohydrate metabolism; GFP-fusion protein localizes to both the nucleus and cytoplasm and is induced in response to the DNA-damaging agent MMS glucose-6-phosphate 1-epimerase
YMR159C	1.10096	4.3665e-07	7.05274e-06	36.662	37.604	15.882	19.833	No	ATG16	Conserved protein involved in autophagy; interacts with Atg12p-Atg5p conjugates to form Atg12p-Atg5p-Atg16p multimers, which binds to membranes and localizes to the pre-autophagosomal structure and are required for autophagy; relocalizes from nucleus to cytoplasmic foci upon DNA replication stress Atg16p
YMR067C	1.10047	5.45601e-10	1.55616e-08	59.815	60.801	30.293	27.792	No	UBX4	UBX domain-containing protein that interacts with Cdc48p; involved in degradation of polyubiquitinated proteins via the ERAD (ER-associated degradation) pathway; modulates the Cdc48p-Nplp-Ufd1p AAA ATPase complex during its role in delivery of misfolded proteins to the proteasome; protein abundance increases in response to DNA replication stress Ubx4p
YMR026C	1.10038	2.65124e-08	5.55213e-07	67.619	57.717	27.744	32.528	No	PEX12	C3HC4-type RING-finger peroxin and E3 ubiquitin ligase; required for peroxisome biogenesis and peroxisomal matrix protein import; forms translocation subcomplex with Pex2p and Pex10p; mutations in human homolog cause peroxisomal disorder ubiquitin-protein ligase peroxin 12
YMR093W	1.09503	0.000289549	0.00236122	27.897	18.174	9.987	12.262	No	UTP15	Nucleolar protein; component of the small subunit (SSU) processome containing the U3 snoRNA that is involved in processing of pre-18S rRNA snoRNA-binding rRNA-processing protein UTP15
YMR025W	1.09376	0.000115131	0.00105844	21.344	22.966	8.529	12.884	No	CSI1	Subunit of the Cop9 signalosome; which is required for deneddylation, or removal of the ubiquitin-like protein Rub1p from Cdc53p (cullin); involved in adaptation to pheromone signaling; functional equivalent of canonical Csn6 subunit of the COP9 signalosome Csi1p
YMR263W	1.09072	3.20704e-08	6.53364e-07	147.042	133.663	57.842	78.085	No	SAP30	Component of Rpd3L histone deacetylase complex; involved in silencing at telomeres, rDNA, and silent mating-type loci; involved in telomere maintenance Sap30p
YMR077C	1.09012	7.47993e-08	1.41538e-06	74.627	71.342	30.502	40.243	No	VPS20	Myristoylated subunit of the ESCRT-III complex; the endosomal sorting complex required for transport of transmembrane proteins into the multivesicular body pathway to the lysosomal/vacuolar lumen; cytoplasmic protein recruited to endosomal membranes ESCRT-III subunit protein VPS20
YJL035C	1.08917	3.3022e-06	4.34864e-05	43.174	44.422	17.524	24.868	No	TAD2	Subunit of tRNA-specific adenosine-34 deaminase; forms a heterodimer with Tad3p that converts adenosine to inosine at the wobble position of several tRNAs tRNA(adenine34) deaminase
YOR192C-B	1.08802	1.31876e-05	0.000150015	57.128	53.851	20.894	32.895	No	YOR192C-B	Retrotransposon TYA Gag and TYB Pol genes; transcribed/translated as one unit; polyprotein is processed to make a nucleocapsid-like protein (Gag), reverse transcriptase (RT), protease (PR), and integrase (IN); similar to retroviral genes gag-pol fusion protein
YDR119W-A	1.08795	1.41052e-14	1.00577e-12	619.051	706.657	324.158	319.332	No	COX26	Stabilizes or regulates formation of respiratory chain supercomplexes composed of Complex III (ubiquinol-cytochrome c reductase) and Complex IV (cytochrome c oxidase) Cox26p
YMR156C	1.08766	1.31132e-06	1.86553e-05	49.365	58.818	30.232	22.367	No	TPP1	DNA 3'-phosphatase; functions in repair of endogenous damage of double-stranded DNA, activity is specific for removal of 3' phosphates at strand breaks; similar to the l-2-haloacid dehalogenase superfamily; homolog of human polynucleotide kinase/3'-phosphatase polynucleotide 3'-phosphatase
YIR032C	1.08086	0.000844238	0.00596888	51.205	32.361	15.024	25.724	No	DAL3	Ureidoglycolate lyase; converts ureidoglycolate to glyoxylate and urea in the third step of allantoin degradation; expression is sensitive to nitrogen catabolite repression; this enzyme is sometimes referred to 'ureidoglycolate hydrolase' but should not be confused with the Arabidopsis thaliana ureidoglycolate hydrolase enzyme which converts ureidoglycolate to glyoxylate, ammonia and carbon dioxi…
YFR041C	1.08073	2.70962e-08	5.59829e-07	100.374	101.39	42.303	56.062	No	ERJ5	Type I membrane protein with a J domain; required to preserve the folding capacity of the endoplasmic reticulum; loss of the non-essential ERJ5 gene leads to a constitutively induced unfolded protein response Erj5p
snR9	1.07994	2.59508e-06	3.51237e-05	153.429	181.841	99.323	64.445	No	snR9	- -
YMR166C	1.0786	8.10736e-08	1.51935e-06	39.99	38.739	18.247	20.233	No	MME1	Transporter of the mitochondrial inner membrane that exports magnesium; involved in mitochondrial Mg2+ homeostasis; has similarity to human mitochondrial ATP-Mg/Pi carriers Mme1p
YML020W	1.07752	1.16479e-06	1.68578e-05	28.104	28.131	13.161	14.352	No	YML020W	hypothetical protein
YML032C	1.07539	1.14412e-08	2.58288e-07	46.389	44.808	22.524	22.134	No	RAD52	Protein that stimulates strand exchange; stimulates strand exchange by facilitating Rad51p binding to single-stranded DNA; anneals complementary single-stranded DNA; involved in the repair of double-strand breaks in DNA during vegetative growth and meiosis and UV induced sister chromatid recombination recombinase RAD52
YMR131C	1.07145	2.81327e-08	5.79198e-07	95.289	81.024	47.719	38.954	No	RRB1	Specific chaperone for ribosomal protein Rpl3p; binds to nascent Rpl3p during translation; essential gene ribosome biosynthesis protein RRB1
YMR121C	1.07046	1.49844e-12	7.30115e-11	188.924	179.176	85.757	95.116	No	RPL15B	Ribosomal 60S subunit protein L15B; binds to 5.8 S rRNA; homologous to mammalian ribosomal protein L15, no bacterial homolog; RPL15B has a paralog, RPL15A, that arose from the whole genome duplication; relocalizes from nucleus to nucleolus upon DNA replication stress ribosomal 60S subunit protein L15B
YMR297W	1.06991	7.51616e-15	5.7825e-13	1335.83	1501.73	716.059	678.819	No	PRC1	Vacuolar carboxypeptidase Y (proteinase C, CPY); broad-specificity C-terminal exopeptidase involved in non-specific protein degradation in the vacuole; member of the serine carboxypeptidase family carboxypeptidase C PRC1
YGR008C	1.06957	9.95869e-10	2.72096e-08	4501.9	5086.33	2055.82	2656.88	No	STF2	Protein involved in resistance to desiccation stress; Stf2p exhibits antioxidant properties, and its overexpression prevents ROS accumulation and apoptosis; binds to F0 sector of mitochondrial F1F0 ATPase in vitro and may modulate the inhibitory action of Inh1p and Stf1p; protein abundance increases in response to DNA replication stress; STF2 has a paralog, TMA10, that arose from the whole genome…
YMR161W	1.069	7.38513e-13	3.75486e-11	145.378	143.565	68.724	73.416	No	HLJ1	Co-chaperone for Hsp40p; anchored in the ER membrane; with its homolog Ydj1p promotes ER-associated protein degradation (ERAD) of integral membrane substrates; similar to E. coli DnaJ type I HSP40 co-chaperone HLJ1
YMR283C	1.069	8.08333e-08	1.51935e-06	47.432	49.478	21.629	25.958	No	RIT1	Initiator methionine 2'-O-ribosyl phosphate transferase; modifies the initiator methionine tRNA at position 64 to distinguish it from elongator methionine tRNA tRNA A64-2'-O-ribosylphosphate transferase
YMR261C	1.06495	6.84471e-08	1.29938e-06	164.913	187.139	100.402	73.438	No	TPS3	Regulatory subunit of trehalose-6-phosphate synthase/phosphatase; involved in synthesis of storage carbohydrate trehalose; expression is induced by stress conditions and repressed by the Ras-cAMP pathway; TPS3 has a paralog, TSL1, that arose from the whole genome duplication trehalose 6-phosphate synthase/phosphatase complex subunit
YMR160W	1.06474	2.96107e-09	7.49498e-08	53.489	56.527	27.132	27.136	No	YMR160W	hypothetical protein; green fluorescent protein (GFP)-fusion protein localizes to the membrane of the vacuole; mutant has enhanced sensitivity to overexpression of mutant huntingtin; YMR160W is not an essential gene; relative distribution within the vacuolar membrane changes upon DNA replication stress hypothetical protein
YMR152W	1.06421	3.1484e-14	2.02293e-12	200.748	209.466	102.301	100.096	No	YIM1	hypothetical protein; null mutant displays sensitivity to DNA damaging agents; may have a role in lipid metabolism, based on localization to lipid droplets; the authentic, non-tagged protein is detected in highly purified mitochondria in high-throughput studies; protein abundance increases in response to DNA replication stress Yim1p
YMR106C	1.05966	6.61258e-06	8.12264e-05	22.657	24.243	11.286	11.873	No	YKU80	Subunit of telomeric Ku complex (Yku70p-Yku80p); involved in telomere length maintenance, structure and telomere position effect; required for localization of telomerase ribonucleoprotein via interaction with TLC1 guide RNA; relocates to sites of double-strand cleavage to promote nonhomologous end joining during DSB repair; colocalizes with quiescent cell telomere hyperclusters ATP-dependent DNA …
YML115C	1.05746	1.50515e-10	4.78295e-09	86.575	85.551	40.673	44.634	No	VAN1	Component of the mannan polymerase I; complex contains Van1p and Mnn9p and is involved in the first steps of mannan synthesis; mutants are vanadate-resistant Van1p
YMR113W	1.05525	8.41663e-08	1.56229e-06	47.381	45.986	21.396	24.98	No	FOL3	Dihydrofolate synthetase, involved in folic acid biosynthesis; catalyzes conversion of dihydropteroate to dihydrofolate in folate coenzyme biosynthesis; FOL3 has a paralog, RMA1, that arose from the whole genome duplication dihydrofolate synthase
YMR086W	1.05421	3.99297e-10	1.16735e-08	70.668	71.265	36.421	34.118	No	SEG1	Component of eisosome required for proper eisosome assembly; precedes Pil1p/Lsp1p during eisosome formation, controls eisosome length and shape; diffusely distributed, forms heterogeneous patches at plasma membrane in small buds, also found in medium and large buds; expression repressed by cAMP; similar to A. gossypii SEG gene and to S. pombe Sle1p, important for generating eisosomes; SEG1 has a …
YML025C	1.05324	6.23301e-11	2.13125e-09	91.185	97.711	48.259	45.679	No	YML6	Mitochondrial ribosomal protein of the large subunit; has similarity to E. coli L4 ribosomal protein and human mitoribosomal MRP-L4 protein; essential for viability, unlike most other mitoribosomal proteins mitochondrial 54S ribosomal protein YmL6
YMR195W	1.04914	9.94802e-16	8.94863e-14	643.021	607.249	310.041	313.485	No	ICY1	hypothetical protein; required for viability in rich media of cells lacking mitochondrial DNA; mutants have an invasive growth defect with elongated morphology; induced by amino acid starvation; ICY1 has a paralog, ICY2, that arose from the whole genome duplication Icy1p
YNL194C	1.04792	3.49486e-08	7.04636e-07	193.131	224.886	118.637	90.102	No	YNL194C	Integral membrane protein; required for sporulation and plasma membrane sphingolipid content; similar to SUR7; GFP-fusion protein is induced in response to the DNA-damaging agent MMS; GFP-fusion protein is more abundant at MCCs (membrane compartment occupied by Can1) in the presence of glycerol and oleate; YNL194C has a paralog, FMP45, that arose from the whole genome duplication hypothetical pro…
YMR002W	1.04765	5.1414e-12	2.27741e-10	597.842	546.294	264.785	306.315	No	MIX17	Mitochondrial intermembrane space protein; required for normal oxygen consumption; contains twin cysteine-x9-cysteine motifs; protein abundance increases in response to DNA replication stress Mix17p
YML070W	1.04689	1.37597e-12	6.76077e-11	301.991	331.563	166.92	149.6	No	DAK1	Dihydroxyacetone kinase; required for detoxification of dihydroxyacetone (DHA); involved in stress adaptation dihydroxyacetone kinase
YMR274C	1.04365	1.87984e-08	4.10127e-07	50.347	54.721	25.416	27.125	No	RCE1	Type II CAAX prenyl protease; involved in the proteolysis and maturation of Ras and the a-factor mating pheromone CAAX prenyl protease
YMR203W	1.0399	3.34604e-13	1.82844e-11	313.009	351.313	167.888	165.464	No	TOM40	Component of the TOM (translocase of outer membrane) complex; responsible for recognition and initial import steps for all mitochondrially directed proteins; constitutes the core element of the protein conducting pore; pre-Tom40p is phosphorylated by PKA, which impairs its import into mitochondria under non-respiratory conditions Tom40p
snR83	1.03948	0.000151349	0.00134489	302.693	306.692	104.728	200.915	No	snR83	- -
YMR309C	1.0367	1.49395e-07	2.6713e-06	45.241	40.501	21.213	21.978	No	NIP1	eIF3c subunit of the eukaryotic translation initiation factor 3 (eIF3); involved in the assembly of preinitiation complex and start codon selection; eIF3 is also involved in programmed stop codon readthrough translation initiation factor eIF3 core subunit c
YMR158W	1.03504	7.75541e-09	1.81384e-07	103.186	107.922	47.523	58.742	No	MRPS8	Mitochondrial ribosomal protein of the small subunit mitochondrial 37S ribosomal protein MRPS8
YMR200W	1.0345	1.77531e-13	1.00779e-11	184.841	183.449	93.343	92.17	No	ROT1	Molecular chaperone involved in protein folding in ER; mutation causes defects in cell wall synthesis and lysis of autophagic bodies, suppresses tor2 mutations, and is synthetically lethal with kar2-1 and with rot2 mutations; involved in N-linked glycosylation and O-mannosylation; transmembrane helix Ser250 is essential for Rot1p to interact with other membrane components and exert its functional…
YML013W	1.03306	9.11304e-11	3.0623e-09	113.212	116.425	61.359	54.439	No	UBX2	Bridging factor involved in ER-associated protein degradation (ERAD); bridges the cytosolic Cdc48p-Npl1p-Ufd1p ATPase complex and the membrane associated Ssm4p and Hrd1p ubiquitin ligase complexes; contains a UBX (ubiquitin regulatory X) domain and a ubiquitin-associated (UBA) domain; redistributes from the ER to lipid droplets during the diauxic shift and stationary phase; required for the maint…
YOL031C	1.03121	0.000119565	0.00109404	134.008	133.233	47.781	87.012	No	SIL1	Nucleotide exchange factor for the ER lumenal Hsp70 chaperone Kar2p; required for protein translocation into the endoplasmic reticulum (ER); homolog of Yarrowia lipolytica SLS1; GrpE-like protein Sil1p
YMR037C	1.02664	2.41998e-09	6.20598e-08	61.924	61.924	31.31	31.461	Yes	MSN2	Stress-responsive transcriptional activator; activated in stochastic pulses of nuclear localization in response to various stress conditions; binds DNA at stress response elements of responsive genes; relative distribution to nucleus increases upon DNA replication stress stress-responsive transcriptional activator MSN2
YMR013C	1.02468	1.68199e-09	4.43e-08	75.567	81.509	41.727	37.986	No	SEC59	Dolichol kinase; catalyzes the terminal step in dolichyl monophosphate (Dol-P) biosynthesis; required for viability and for normal rates of lipid intermediate synthesis and protein N-glycosylation dolichol kinase
YMR221C	1.02203	5.97163e-08	1.16e-06	76.715	82.456	44.974	35.896	No	FMP42	hypothetical protein; the authentic, non-tagged protein is detected in highly purified mitochondria in high-throughput studies; physical interaction with Atg27p suggests a possible role in autophagy Fmp42p
YDL160C	1.01971	5.34011e-07	8.5078e-06	57.924	63.268	27.009	34.596	No	DHH1	Cytoplasmic DEAD-box helicase, stimulates mRNA decapping; coordinates distinct steps in mRNA function and decay, interacting with both decapping and deadenylase complexes; role in translational repression, mRNA decay, and possibly mRNA export; interacts and cooperates with Ngr1p to promote specific mRNA decay; ATP- and RNA-bound form promotes processing body (PB) assembly, while ATPase stimulatio…
YNL336W	1.01956	7.52276e-10	2.07479e-08	180.179	214.841	95.769	105.232	No	COS1	Endosomal protein involved in turnover of plasma membrane proteins; member of the DUP380 subfamily of conserved, often subtelomeric COS genes; required for the multivesicular vesicle body sorting pathway that internalizes plasma membrane proteins for degradation; Cos proteins provide ubiquitin in trans for nonubiquitinated cargo proteins Cos1p
YMR104C	1.01788	1.05436e-06	1.53354e-05	95.93	120.908	62.56	48.058	No	YPK2	Protein kinase similar to S/T protein kinase Ypk1p; functionally redundant with YPK1 at the genetic level; participates in a signaling pathway required for optimal cell wall integrity; involved in the TORC-dependent phosphorylation of ribosomal proteins Rps6a/b (S6); human homolog SGK2 can complement a ypk1 ypk2 double mutant putative protein kinase YPK2
YMR188C	1.01749	7.61394e-05	0.000728621	86.555	82.522	31.96	54.15	No	MRPS17	Mitochondrial ribosomal protein of the small subunit mitochondrial 37S ribosomal protein MRPS17
YMR060C	1.01647	4.04046e-09	9.96816e-08	60.415	61.429	30.931	31.25	No	SAM37	Component of the Sorting and Assembly Machinery (SAM) complex; the SAM (or TOB) complex is located in the mitochondrial outer membrane; binds precursors of beta-barrel proteins and facilitates their outer membrane insertion; contributes to SAM complex stability SAM complex subunit SAM37
YMR313C	1.01465	9.20466e-09	2.10233e-07	62.699	58.19	31.2	30.571	No	TGL3	Bifunctional triacylglycerol lipase and LPE acyltransferase; major lipid particle-localized triacylglycerol (TAG) lipase; catalyzes acylation of lysophosphatidylethanolamine (LPE), a function which is essential for sporulation; protein level and stability of Tgl3p are markedly reduced in the absence of lipid droplets; required with Tgl4p for timely bud formation bifunctional triglyceride lipase/l…
YMR314W	1.01391	9.26875e-15	6.948e-13	643.01	681.929	332.908	344.134	No	PRE5	Alpha 6 subunit of the 20S proteasome; protein abundance increases in response to DNA replication stress proteasome core particle subunit alpha 6
YMR172W	1.01338	4.06672e-06	5.27231e-05	27.98	26.887	14.081	13.929	Yes	HOT1	Transcription factor for glycerol biosynthetic genes; required for the transient induction of glycerol biosynthetic genes GPD1 and GPP2 in response to high osmolarity; targets Hog1p to osmostress responsive promoters; has similarity to Msn1p and Gcr1p Hot1p
YMR270C	1.01321	5.31062e-08	1.04549e-06	68.818	71.981	32.56	39.443	No	RRN9	Protein involved in promoting high level transcription of rDNA; subunit of UAF (upstream activation factor) for RNA polymerase I Rrn9p
YMR021C	1.01139	9.11178e-08	1.68065e-06	49.717	45.678	25.085	23.768	Yes	MAC1	Copper-sensing transcription factor; involved in regulation of genes required for high affinity copper transport; required for regulation of yeast copper genes in response to DNA-damaging agents; undergoes changes in redox state in response to changing levels of copper or MMS Mac1p
YMR148W	1.01045	1.84107e-09	4.82724e-08	180.262	195.951	106.014	86.756	No	OSW5	hypothetical protein with possible role in spore wall assembly; predicted to contain an N-terminal transmembrane domain; osw5 null mutant spores exhibit increased spore wall permeability and sensitivity to beta-glucanase digestion Osw5p
YMR024W	1.00909	6.929e-10	1.94778e-08	91.247	96.18	45.82	50.259	No	MRPL3	Mitochondrial ribosomal protein of the large subunit; located in close proximity to the polypeptide exit channel of the ribosome; mutations in human homolog MRPL44 cause childhood cardiomyopathy; human MRPL44 deficiency results in inefficient assembly of the mitochondrial ribosome, and in tissue-specific respiratory chain deficiency, manifesting as either Complex I+Complex IV or Complex IV defici…
YMR298W	1.00891	2.9501e-14	1.91658e-12	593.397	612.437	298.595	319.688	No	LIP1	Ceramide synthase subunit; single-span ER membrane protein associated with Lag1p and Lac1p and required for ceramide synthase activity, null mutant grows extremely slowly and is defective in ceramide synthesis sphingosine N-acyltransferase subunit LIP1
YMR304W	1.00819	1.27936e-07	2.30877e-06	59.794	66.429	35.342	29.471	No	UBP15	Ubiquitin-specific protease involved in protein deubiquitination; forms a complex with AAA peroxins Pex1p and Pex6p; deubiquitinates mono- and polyubiquitinated forms of Pex5p; deubiquitinates Clb5p, counteracting APC activity, and facilitating both Clb5p accumulation and S phase entry; physically interacts with anaphase-promoting complex/cyclosome (APC/C) activator, Cdh1p; catalytic activity reg…
YMR224C	1.00473	8.44118e-05	0.000794775	20.207	18.108	9.424	10.305	No	MRE11	Nuclease subunit of the MRX complex with Rad50p and Xrs2p; complex functions in repair of DNA double-strand breaks and in telomere stability; Mre11p associates with Ser/Thr-rich ORFs in premeiotic phase; nuclease activity required for MRX function; widely conserved; forms nuclear foci upon DNA replication stress MRX complex nuclease subunit
YOR348C	1.00295	0.00479839	0.0262699	11.545	8.404	4.681	5.592	No	PUT4	Proline permease; required for high-affinity transport of proline; also transports the toxic proline analog azetidine-2-carboxylate (AzC); PUT4 transcription is repressed in ammonia-grown cells proline permease PUT4
YDR365W-B	-1.00014	5.6241e-13	2.95288e-11	117.687	117.042	236.329	248.018	No	YDR365W-B	Retrotransposon TYA Gag and TYB Pol genes; transcribed/translated as one unit; polyprotein is processed to make a nucleocapsid-like protein (Gag), reverse transcriptase (RT), protease (PR), and integrase (IN); similar to retroviral genes gag-pol fusion protein
YNL065W	-1.00196	0.000274636	0.00225533	10.615	8.118	18.088	20.6	No	AQR1	Plasma membrane transporter of the major facilitator superfamily; member of the 12-spanner drug:H(+) antiporter DHA1 family; confers resistance to short-chain monocarboxylic acids and quinidine; involved in the excretion of excess amino acids; AQR1 has a paralog, QDR1, that arose from the whole genome duplication; relocalizes from plasma membrane to cytoplasm upon DNA replication stress Aqr1p
YOR107W	-1.00476	3.89776e-06	5.06449e-05	13.83	14.22	28.541	29.482	No	RGS2	Negative regulator of glucose-induced cAMP signaling; directly activates the GTPase activity of the heterotrimeric G protein alpha subunit Gpa2p GTPase-activating protein RGS2
YJR030C	-1.00607	1.82925e-05	0.000204506	14.192	14.683	33.308	26.58	No	RBH2	hypothetical protein; expression repressed in carbon limited vs carbon replete chemostat cultures; non-essential gene; contains a PH-like domain; RBH2 has a paralog, RBH1, that arose from the whole genome duplication hypothetical protein
YOR306C	-1.01018	9.61985e-07	1.42398e-05	49.83	49.654	120.315	86.678	No	MCH5	Plasma membrane riboflavin transporter; facilitates the uptake of vitamin B2; required for FAD-dependent processes; sequence similarity to mammalian monocarboxylate permeases, however mutants are not deficient in monocarboxylate transport Mch5p
YFR035C	-1.01469	3.28522e-09	8.24407e-08	42.874	38.871	81.615	88.835	No	YFR035C	hypothetical protein; deletion mutant exhibits synthetic phenotype with alpha-synuclein hypothetical protein
YLR112W	-1.02379	0.000324416	0.00261276	12.238	9.462	26.396	19.166	No	YLR112W	hypothetical protein; conserved across S. cerevisiae strains hypothetical protein
YOR072W	-1.02429	0.00745797	0.037975	3.814	6.565	9.522	12.273	No	YOR29-23	hypothetical protein; conserved across S. cerevisiae strains; partially overlaps the dubious gene YOR072W-A; diploid deletion strains are methotrexate, paraquat and wortmannin sensitive hypothetical protein
YHR214C-B	-1.02692	1.53105e-10	4.83895e-09	46.151	49.401	97.767	103.22	No	YHR214C-B	Retrotransposon TYA Gag and TYB Pol genes; transcribed/translated as one unit; polyprotein is processed to make a nucleocapsid-like protein (Gag), reverse transcriptase (RT), protease (PR), and integrase (IN); similar to retroviral genes; YHR214C-B has a paralog, YAR070C, that arose from a segmental duplication gag-pol fusion protein
YHR041C	-1.03412	0.000112638	0.00103715	112.943	113.991	312.185	167.887	No	SRB2	Subunit of the RNA polymerase II mediator complex; associates with core polymerase subunits to form the RNA polymerase II holoenzyme; general transcription factor involved in telomere maintenance Srb2p
YGL186C	-1.03727	1.77639e-12	8.24329e-11	67.288	66.606	140.107	143.486	No	TPN1	Plasma membrane pyridoxine (vitamin B6) transporter; member of the purine-cytosine permease subfamily within the major facilitator superfamily; proton symporter with similarity to Fcy21p, Fcy2p, and Fcy22p Tpn1p
YOL131W	-1.03856	0.000424915	0.0033304	8.651	9.153	22.267	15.408	No	YOL131W	hypothetical protein; YOL131W has a paralog, STB1, that arose from the whole genome duplication hypothetical protein
YJL077C	-1.04412	9.21042e-11	3.07733e-09	40.962	41.36	89.605	85.667	No	ICS3	Protein with a role in copper homeostasis; possible role in vacuolar sorting and processing of secretory proteins; null mutants are hypersensitive to sortin2 Ics3p
YGL147C	-1.04543	2.0492e-08	4.38889e-07	649.946	726.67	1693.77	1239.24	No	RPL9A	Ribosomal 60S subunit protein L9A; homologous to mammalian ribosomal protein L9 and bacterial L6; RPL9A has a paralog, RPL9B, that arose from a single-locus duplication ribosomal 60S subunit protein L9A
YOR136W	-1.0486	2.79149e-14	1.83392e-12	203.012	220.459	465.98	438.005	No	IDH2	Subunit of mitochondrial NAD(+)-dependent isocitrate dehydrogenase; complex catalyzes the oxidation of isocitrate to alpha-ketoglutarate in the TCA cycle; phosphorylated isocitrate dehydrogenase (NAD(+)) IDH2
YDR089W	-1.05971	1.68115e-08	3.69536e-07	23.949	22.569	51.763	48.336	No	VTC5	Novel subunit of the vacuolar transporter chaperone complex; vacuolar transmembrane protein that regulates biosynthesis of polyphosphate; deletion reduces and overexpression increases polyP accumulation; SPX domain (Syg1, Pho81, Xpr1)-containing protein involved in phosphate homeostasis; relocalizes from vacuole to cytoplasm upon DNA replication stress hypothetical protein
YJL218W	-1.06908	0.000505834	0.00388138	5.457	5.717	11.691	12.495	No	YJL218W	Putative acetyltransferase; similar to bacterial galactoside O-acetyltransferases; induced by oleate in an OAF1/PIP2-dependent manner; promoter contains an oleate response element consensus sequence; non-essential gene acetyltransferase
YLL012W	-1.07082	0.000294495	0.00239821	7.018	5.937	14.522	13.474	No	YEH1	Steryl ester hydrolase; one of three gene products (Yeh1p, Yeh2p, Tgl1p) responsible for steryl ester hydrolase activity and involved in sterol homeostasis; localized to lipid particle membranes; YEH1 has a paralog, YEH2, that arose from the whole genome duplication sterol esterase
YJR124C	-1.07821	2.65696e-05	0.000284529	15.783	11.51	32.462	27.225	No	YJR124C	hypothetical protein; expression induced under calcium shortage hypothetical protein
YIL123W	-1.07919	0.000107967	0.000997289	90.855	93.14	264.466	137.16	No	SIM1	Protein of the SUN family (Sim1p, Uth1p, Nca3p, Sun4p); may participate in DNA replication; promoter contains SCB regulation box at -300 bp indicating that expression may be cell cycle-regulated; SIM1 has a paralog, SUN4, that arose from the whole genome duplication putative glucosidase SIM1
YIR034C	-1.08257	8.66902e-15	6.58283e-13	199.239	219.555	446.079	468.955	No	LYS1	Saccharopine dehydrogenase (NAD+, L-lysine-forming); catalyzes the conversion of saccharopine to L-lysine, which is the final step in the lysine biosynthesis pathway; also has mRNA binding activity saccharopine dehydrogenase (NAD+, L-lysine-forming)
YGR234W	-1.08548	7.27776e-15	5.67374e-13	107.806	105.014	228.474	237.546	No	YHB1	Nitric oxide oxidoreductase; flavohemoglobin that plays role in oxidative and nitrosative stress responses; protects against nitration of cellular targets and against cell growth inhibition under aerobic or anaerobic conditions; yeast flavohemoglobin Yhb1p and human homolog neuroglobin NGB protect cells against alpha-synuclein cytotoxicity and aggregate formation; protein increases in abundance, …
YDL243C	-1.09484	2.91091e-07	4.93335e-06	29.975	33.727	80.39	59.998	No	AAD4	Putative aryl-alcohol dehydrogenase; involved in oxidative stress response; similar to P. chrysosporium aryl-alcohol dehydrogenase; expression induced in cells treated with the mycotoxin patulin; members of the AAD gene family comprise three pairs (AAD3 + AAD15, AAD6/AAD16 + AAD4, AAD10 + AAD14) whose two genes are more related to one another than to other members of the family putative aryl-alco…
YBR072W	-1.09809	6.49903e-07	1.00263e-05	1275.75	1625.02	3837.34	2572.67	No	HSP26	Small heat shock protein (sHSP) with chaperone activity; forms hollow, sphere-shaped oligomers that suppress unfolded proteins aggregation; long-lived protein that is preferentially retained in mother cells and forms cytoplasmic foci; oligomer activation requires heat-induced conformational change; also has mRNA binding activity chaperone protein HSP26
YHR153C	-1.1171	0.000670738	0.00489003	5.923	4.472	11.654	11.628	No	SPO16	Meiosis-specific protein involved in synaptonemal complex assembly; implicated in regulation of crossover formation; required for sporulation Spo16p
YFR018C	-1.11719	1.53199e-12	7.34023e-11	62.802	60.779	146.736	130.023	No	YFR018C	hypothetical protein; SWAT-GFP and seamless GFP fusion proteins localize to the endoplasmic reticulum and mCherry fusion protein localizes to the vacuole hypothetical protein
YJR146W	-1.11962	3.35992e-06	4.41144e-05	19.649	18.108	49.472	35.274	No	YJR146W	hypothetical protein; expressed at both mRNA and protein levels; partially overlaps HMS2 hypothetical protein
YDR451C	-1.12317	1.32187e-06	1.87596e-05	17.654	14.936	40.783	32.684	Yes	YHP1	Homeobox transcriptional repressor; binds Mcm1p and early cell cycle box (ECB) elements of cell cycle regulated genes, thereby restricting ECB-mediated transcription to the M/G1 interval; YHP1 has a paralog, YOX1, that arose from the whole genome duplication Yhp1p
YGL234W	-1.13759	1.21105e-06	1.7398e-05	98.782	61.33	179.762	183.929	No	ADE5,7	Enzyme of the 'de novo' purine nucleotide biosynthetic pathway; contains aminoimidazole ribotide synthetase and glycinamide ribotide synthetase activities bifunctional aminoimidazole ribotide synthase/glycinamide ribotide synthase
YGR109C	-1.14226	0.00890278	0.0440394	2.202	2.842	5.674	5.77	No	CLB6	B-type cyclin involved in DNA replication during S phase; activates Cdc28p to promote initiation of DNA synthesis; functions in formation of mitotic spindles along with Clb3p and Clb4p; most abundant during late G1; CLB6 has a paralog, CLB5, that arose from the whole genome duplication B-type cyclin CLB6
YGR138C	-1.14702	0.000242988	0.00202386	38.626	35.368	114.347	54.973	No	TPO2	Polyamine transporter of the major facilitator superfamily; member of the 12-spanner drug:H(+) antiporter DHA1 family; specific for spermine; localizes to the plasma membrane; transcription of TPO2 is regulated by Haa1p; TPO2 has a paralog, TPO3, that arose from the whole genome duplication spermine transporter
YKR080W	-1.15131	8.17606e-06	9.81631e-05	34.399	21.214	59.459	68.013	No	MTD1	NAD-dependent 5,10-methylenetetrahydrafolate dehydrogenase; plays a catalytic role in oxidation of cytoplasmic one-carbon units; expression is regulated by Bas1p and Bas2p, repressed by adenine, and may be induced by inositol and choline methylenetetrahydrofolate dehydrogenase (NAD(+))
YJL190C	-1.15634	2.66179e-11	1.03757e-09	1962.01	1986.11	5185.4	3899.11	No	RPS22A	Protein component of the small (40S) ribosomal subunit; homologous to mammalian ribosomal protein S15A and bacterial S8; RPS22A has a paralog, RPS22B, that arose from the whole genome duplication ribosomal 40S subunit protein S22A
YHR214C-E	-1.15702	0.00550928	0.0295801	4.362	5.21	7.463	14.608	No	YHR214C-E	hypothetical protein; identified by gene-trapping, microarray-based expression analysis, and genome-wide homology searching hypothetical protein
YPL223C	-1.16246	1.57343e-07	2.80483e-06	369.971	407.014	1098.28	697.495	No	GRE1	Hydrophilin essential in desiccation-rehydration process; stress induced (osmotic, ionic, oxidative, heat shock and heavy metals); regulated by the HOG pathway; GRE1 has a paralog, SIP18, that arose from the whole genome duplication Gre1p
YKL220C	-1.16437	2.09901e-05	0.000231564	7.566	7.688	19.154	16.242	No	FRE2	Ferric reductase and cupric reductase; reduces siderophore-bound iron and oxidized copper prior to uptake by transporters; expression induced by low iron levels but not by low copper levels ferric/cupric-chelate reductase
YJR047C	-1.18084	3.20934e-07	5.37679e-06	15.814	17.238	43.749	33.64	No	ANB1	Translation elongation factor eIF-5A; previously thought to function in translation initiation; undergoes an essential hypusination modification; expressed under anaerobic conditions; ANB1 has a paralog, HYP2, that arose from the whole genome duplication; human EIF5A complements the inviability of the yeast hyp2 anb1 double null mutant translation elongation factor eIF-5A
YLL053C	-1.18125	1.92463e-05	0.000214349	25.003	15.575	41.653	53.317	No	YLL053C	Putative protein; in the Sigma 1278B strain background YLL053C is contiguous with AQY2 which encodes an aquaporin hypothetical protein
YOL104C	-1.18325	1.96432e-06	2.72166e-05	13.272	17.767	32.524	40.132	No	NDJ1	Protein that regulates meiotic SPB cohesion and telomere clustering; localizes to both spindle pole bodies (SPBs) and telomeres; required for bouquet formation, effective homolog pairing, ordered cross-over distribution, sister chromatid cohesion at meiotic telomeres, chromosomal segregation and telomere-led rapid prophase movement Ndj1p
YNL014W	-1.19689	2.31863e-05	0.000252458	8.589	8.757	23.811	17.32	No	HEF3	Translational elongation factor EF-3; member of the ABC superfamily; stimulates EF-1 alpha-dependent binding of aminoacyl-tRNA by the ribosome; normally expressed in zinc deficient cells; HEF3 has a paralog, YEF3, that arose from the whole genome duplication translation elongation factor EF-3
YGR096W	-1.19797	8.25428e-07	1.2471e-05	26.295	28.242	77.866	51.316	No	TPC1	Mitochondrial membrane transporter; mediates uptake of the essential cofactor thiamine pyrophosphate (ThPP) into mitochondria; expression appears to be regulated by carbon source; member of the mitochondrial carrier family thiamine transporter TPC1
YIL057C	-1.2055	5.7732e-06	7.21279e-05	9.664	7.611	20.784	20.444	No	RGI2	hypothetical protein; involved in energy metabolism under respiratory conditions; expression induced under carbon limitation and repressed under high glucose; RGI2 has a paralog, RGI1, that arose from the whole genome duplication Rgi2p
YIL114C	-1.20792	3.69098e-07	6.04514e-06	29.241	33.121	89.066	59.642	No	POR2	Putative mitochondrial porin (voltage-dependent anion channel); not required for mitochondrial membrane permeability or mitochondrial osmotic stability; POR2 has a paralog, POR1, that arose from the whole genome duplication putative porin POR2
YKL043W	-1.21765	9.13873e-07	1.36133e-05	36.683	40.699	114.519	71.404	Yes	PHD1	Transcriptional activator that enhances pseudohyphal growth; physically interacts with the Tup1-Cyc8 complex and recruits Tup1p to its targets; regulates expression of FLO11, an adhesin required for pseudohyphal filament formation; similar to StuA, an A. nidulans developmental regulator; potential Cdc28p substrate; PHD1 has a paralog, SOK2, that arose from the whole genome duplication Phd1p
YNL037C	-1.22101	1.19772e-18	1.4292e-16	93.955	96.235	228.707	228.808	No	IDH1	Subunit of mitochondrial NAD(+)-dependent isocitrate dehydrogenase; complex catalyzes the oxidation of isocitrate to alpha-ketoglutarate in the TCA cycle isocitrate dehydrogenase (NAD(+)) IDH1
YOR343C	-1.22714	0.0011422	0.00772073	5.189	3.205	10.453	9.838	No	YOR343C	hypothetical protein; conserved across S. cerevisiae strains hypothetical protein
YBR115C	-1.23535	1.46494e-14	1.03199e-12	61.851	59.733	158.072	137.416	No	LYS2	Alpha aminoadipate reductase; catalyzes the reduction of alpha-aminoadipate to alpha-aminoadipate 6-semialdehyde, which is the fifth step in biosynthesis of lysine; activation requires posttranslational phosphopantetheinylation by Lys5p L-aminoadipate-semialdehyde dehydrogenase
YKR104W	-1.25832	9.15002e-07	1.36133e-05	9.458	10.277	27.009	21.633	No	NFT1	Putative transporter of the MRP subfamily; contains a stop codon in S288C; adjacent ORFs YKR103W and YKR104W are merged in different strain backgrounds; MRP stands for multidrug resistance-associated protein hypothetical protein
YIL134W	-1.25971	9.44745e-07	1.40201e-05	11.122	11.158	31.556	23.579	No	FLX1	Mitochondrial flavin adenine dinucleotide transporter; FAD is a synthesis product of riboflavin; human homolog SLC25A32 is implicated in multiple acyl-CoA dehydrogenase deficiency (MADD) or glutaric aciduria type II (GAII), and can complement yeast null mutant flavin adenine dinucleotide transporter FLX1
YHR139C-A	-1.26476	0.00154375	0.00994088	3.907	5.177	14.399	8.238	No	YHR139C-A	hypothetical protein; conserved across S. cerevisiae strains hypothetical protein
YNL095C	-1.27142	2.53472e-08	5.33111e-07	18.843	16.555	49.888	38.42	No	YNL095C	hypothetical protein; predicted to contain a transmembrane domain; not an essential gene; YNL095C has a paralog, ECM3, that arose from the whole genome duplication hypothetical protein
YLL055W	-1.27223	3.46366e-07	5.72722e-06	20.104	22.558	63.846	42.578	No	YCT1	High-affinity cysteine-specific transporter; has similarity to the Dal5p family of transporters; green fluorescent protein (GFP)-fusion protein localizes to the endoplasmic reticulum; YCT1 is not an essential gene Yct1p
YHR213W-A	-1.27746	8.33326e-06	9.98455e-05	6.47	6.939	15.196	18.176	No	YHR213W-A	hypothetical protein; identified by gene-trapping, microarray-based expression analysis, and genome-wide homology searching hypothetical protein
YHL028W	-1.28541	2.92265e-10	8.80862e-09	31.618	36.448	96.517	74.628	No	WSC4	Endoplasmic reticulum (ER) membrane protein; involved in the translocation of soluble secretory proteins and insertion of membrane proteins into the ER membrane; may also have a role in the stress response but has only partial functional overlap with WSC1-3 Wsc4p
YHR130C	-1.29522	0.00792641	0.0399532	2.832	1.707	6.789	4.791	No	YHR130C	hypothetical protein; conserved among S. cerevisiae strains; YHR130C is not an essential gene hypothetical protein
YLR089C	-1.31177	9.86291e-16	8.94863e-14	77.81	76.981	216.489	180.327	No	ALT1	Alanine transaminase (glutamic pyruvic transaminase); involved in alanine biosynthesis and catabolism; TOR1-independent role in determining chronological lifespan; expression is induced in the presence of alanine; repression is mediated by Nrg1p; ALT1 has a paralog, ALT2, that arose from the whole genome duplication; Alt2p is catalytically inactive alanine transaminase ALT1
YLR413W	-1.31761	5.68167e-08	1.10736e-06	10.553	9.076	25.661	24.891	No	INA1	hypothetical protein; not an essential gene; YLR413W has a paralog, FAT3, that arose from the whole genome duplication Ina1p
YNR050C	-1.32272	2.78939e-21	4.9423e-19	621.253	664.647	1761.61	1558.02	No	LYS9	Saccharopine dehydrogenase (NADP+, L-glutamate-forming); catalyzes the formation of saccharopine from alpha-aminoadipate 6-semialdehyde, the seventh step in lysine biosynthesis pathway; exhibits genetic and physical interactions with TRM112 saccharopine dehydrogenase (NADP+, L-glutamate-forming)
YOR383C	-1.3266	4.3151e-09	1.05567e-07	964.929	963.684	3093.04	1901.84	No	FIT3	Mannoprotein that is incorporated into the cell wall; incorporated via a glycosylphosphatidylinositol (GPI) anchor; involved in the retention of siderophore-iron in the cell wall Fit3p
YNR073C	-1.35922	0.00263755	0.0157204	2.377	1.917	5.478	5.792	No	MAN2	Mannitol dehydrogenase; MAN2 has a paralog, DSF1, that arose from a segmental duplication putative mannitol dehydrogenase
YEL040W	-1.3779	7.27294e-10	2.02499e-08	44.683	46.669	146.896	98.384	No	UTR2	Chitin transglycosylase; functions in the transfer of chitin to beta(1-6) and beta(1-3) glucans in the cell wall; similar to and functionally redundant with Crh1; glycosylphosphatidylinositol (GPI)-anchored protein localized to bud neck Utr2p
YOR382W	-1.39351	2.50511e-22	5.42495e-20	460.805	460.854	1344.98	1154.34	No	FIT2	Mannoprotein that is incorporated into the cell wall; incorporated via a glycosylphosphatidylinositol (GPI) anchor; involved in the retention of siderophore-iron in the cell wall Fit2p
YEL039C	-1.40467	6.5366e-10	1.84635e-08	26.336	35.192	95.132	72.727	No	CYC7	Cytochrome c isoform 2, expressed under hypoxic conditions; also known as iso-2-cytochrome c; electron carrier of the mitochondrial intermembrane space that transfers electrons from ubiquinone-cytochrome c oxidoreductase to cytochrome c oxidase during cellular respiration; protein abundance increases in response to DNA replication stress; CYC7 has a paralog, CYC1, that arose from the whole genome…
YDL242W	-1.41195	0.000815082	0.00579779	3.928	9.429	21.74	14.819	No	YDL242W	hypothetical protein; conserved across S. cerevisiae strains hypothetical protein
YBR092C	-1.42085	1.91361e-08	4.12874e-07	24.083	21.346	76.37	49.437	No	PHO3	Constitutively expressed acid phosphatase similar to Pho5p; brought to the cell surface by transport vesicles; hydrolyzes thiamin phosphates in the periplasmic space, increasing cellular thiamin uptake; expression is repressed by thiamin acid phosphatase PHO3
YDR344C	-1.44456	0.00650196	0.0339134	2.698	1.179	6.115	4.869	No	YDR344C	hypothetical protein; conserved among S. cerevisiae strains hypothetical protein
YIL094C	-1.4482	9.77399e-23	2.28594e-20	365.713	410.66	1162.3	1023.99	No	LYS12	Homo-isocitrate dehydrogenase; an NAD-linked mitochondrial enzyme required for the fourth step in the biosynthesis of lysine, in which homo-isocitrate is oxidatively decarboxylated to alpha-ketoadipate homoisocitrate dehydrogenase
YLR343W	-1.45218	1.40712e-10	4.52057e-09	21.861	20.675	69.729	50.46	No	GAS2	1,3-beta-glucanosyltransferase; involved with Gas4p in spore wall assembly; has similarity to Gas1p 1,3-beta-glucanosyltransferase
YKL096W	-1.49761	1.35666e-16	1.39164e-14	60.218	56.726	190.963	150.078	No	CWP1	Cell wall mannoprotein that localizes to birth scars of daughter cells; linked to a beta-1,3- and beta-1,6-glucan heteropolymer through a phosphodiester bond; required for propionic acid resistance Cwp1p
YDL154W	-1.51935	0.000150468	0.00133909	3.566	2.313	8.382	9.127	No	MSH5	Protein of the MutS family; forms a dimer with Msh4p that facilitates crossovers between homologs during meiosis; msh5-Y823H mutation confers tolerance to DNA alkylating agents; homologs present in C. elegans and humans MutS family protein MSH5
YGL039W	-1.53213	7.22915e-12	3.15439e-10	16.166	13.724	48.908	40.388	No	YGL039W	Aldehyde reductase; reduces aliphatic aldehyde substrates using NADH as cofactor; shown to reduce carbonyl compounds to chiral alcohols carbonyl reductase (NADPH-dependent)
YJL189W	-1.59364	0.0075905	0.0384923	315.758	739.172	1820.5	1463.79	No	RPL39	Ribosomal 60S subunit protein L39; required for ribosome biogenesis; loss of both Rpl31p and Rpl39p confers lethality; also exhibits genetic interactions with SIS1 and PAB1; homologous to mammalian ribosomal protein L39, no bacterial homolog ribosomal 60S subunit protein L39
YDR019C	-1.60837	8.25273e-08	1.54165e-06	44.962	26.215	87.424	136.36	No	GCV1	T subunit of the mitochondrial glycine decarboxylase complex; glycine decarboxylase is required for the catabolism of glycine to 5,10-methylene-THF; expression is regulated by levels of levels of 5,10-methylene-THF in the cytoplasm glycine decarboxylase subunit T
YAR009C	-1.63714	1.53328e-14	1.06727e-12	17.944	20.047	53.92	67.702	No	YAR009C	Retrotransposon TYA Gag and TYB Pol genes; Gag processing produces capsid proteins, Pol is cleaved to produce protease, reverse transcriptase and integrase activities; in YARCTy1-1 TYB is mutant and probably non-functional; protein product forms cytoplasmic foci upon DNA replication stress truncated gag-pol fusion protein
YJL157C	-1.67767	7.39248e-14	4.64772e-12	11.752	10.001	36.433	35.385	No	FAR1	CDK inhibitor and nuclear anchor; during the cell cycle Far1p sequesters the GEF Cdc24p in the nucleus; phosphorylation by Cdc28p-Cln results in SCFCdc4 complex-mediated ubiquitin-dependent degradation, releasing Cdc24p for export and activation of GTPase Cdc42p; in response to pheromone, phosphorylation of Far1p by MAPK Fus3p results in association with, and inhibition of Cdc28p-Cln, as well as …
YGR294W	-1.70108	0.000259311	0.00215368	1.685	3.558	7.353	10.328	No	PAU12	hypothetical protein; member of the seripauperin multigene family encoded mainly in subtelomeric regions; SWAT-GFP fusion protein localizes to both the endoplasmic reticulum and vacuole seripauperin PAU12
YJL196C	-1.70421	1.27191e-30	6.7608e-28	91.206	99.022	336.609	303.146	No	ELO1	Elongase I, medium-chain acyl elongase; catalyzes carboxy-terminal elongation of unsaturated C12-C16 fatty acyl-CoAs to C16-C18 fatty acids; ELO1 has a paralog, ELO2, that arose from the whole genome duplication fatty acid elongase ELO1
YBR291C	-1.70739	1.08369e-32	7.04038e-30	96.457	90.519	327.099	303.257	No	CTP1	Mitochondrial inner membrane citrate transporter; member of the mitochondrial carrier family Ctp1p
YHL024W	-1.74777	4.14156e-16	3.96979e-14	11.638	11.29	41.568	37.953	No	RIM4	Putative RNA-binding protein; required for the expression of early and middle sporulation genes Rim4p
YER078W-A	-1.77001	4.92905e-08	9.76954e-07	29.84	16.445	101.554	61.754	No	YER078W-A	hypothetical protein; identified by fungal homology and RT-PCR hypothetical protein
YDL241W	-1.8094	1.90543e-08	4.12632e-07	4.476	5.739	21.458	15.452	No	YDL241W	hypothetical protein; SWAT-GFP and mCherry fusion proteins localize to the endoplasmic reticulum; YDL241W is not an essential gene hypothetical protein
YER011W	-1.8166	1.13331e-05	0.000130699	1.933	2.324	7.573	7.949	No	TIR1	Cell wall mannoprotein; expression is downregulated at acidic pH and induced by cold shock and anaerobiosis; abundance is increased in cells cultured without shaking; member of the Srp1p/Tip1p family of serine-alanine-rich proteins GPI-anchored mannoprotein
YHR007C-A	-1.82957	6.6914e-06	8.20223e-05	5.633	12.138	42.401	22.701	No	YHR007C-A	hypothetical protein; identified by expression profiling and mass spectrometry; SWAT-GFP fusion protein localizes to the nucleus hypothetical protein
YCL021W-A	-1.84087	1.64069e-15	1.41713e-13	22.564	16.61	80.635	64.289	No	YCL021W-A	hypothetical protein; SWAT-GFP and mCherry fusion proteins localize to the vacuole hypothetical protein
YOR153W	-1.95489	1.82755e-23	4.64596e-21	40.28	33.452	164.334	130.979	No	PDR5	Plasma membrane ATP-binding cassette (ABC) transporter; multidrug transporter actively regulated by Pdr1p; also involved in steroid transport, cation resistance, and cellular detoxification during exponential growth; PDR5 has a paralog, PDR15, that arose from the whole genome duplication ATP-binding cassette multidrug transporter PDR5
YBR085W	-2.27307	3.62266e-11	1.34061e-09	4.145	4.802	27.757	16.898	No	AAC3	Mitochondrial inner membrane ADP/ATP translocator; exchanges cytosolic ADP for mitochondrially synthesized ATP; expressed under anaerobic conditions; similar to Aac1p; has roles in maintenance of viability and in respiration; AAC3 has a paralog, PET9, that arose from the whole genome duplication ADP/ATP carrier protein AAC3
YOL158C	-2.27807	5.04733e-31	2.95118e-28	18.791	18.119	102.264	82.732	No	ENB1	Endosomal ferric enterobactin transporter; expressed under conditions of iron deprivation; member of the major facilitator superfamily; expression is regulated by Rcs1p and affected by chloroquine treatment Enb1p
YGL258W	-2.35446	5.28277e-52	3.08883e-48	44.311	50.205	242.187	256.411	No	VEL1	hypothetical protein; highly induced in zinc-depleted conditions and has increased expression in NAP1 deletion mutants; VEL1 has a paralog, YOR387C, that arose from a single-locus duplication Vel1p
YGR087C	-2.37629	2.85197e-19	3.78988e-17	15.122	16.874	106.37	65.1	No	PDC6	Minor isoform of pyruvate decarboxylase; decarboxylates pyruvate to acetaldehyde, involved in amino acid catabolism; transcription is glucose- and ethanol-dependent, and is strongly induced during sulfur limitation indolepyruvate decarboxylase 6
YHR216W	-2.39663	1.43746e-34	1.20069e-31	22.957	28.759	152.876	127.989	No	IMD2	Inosine monophosphate dehydrogenase; catalyzes the rate-limiting step in GTP biosynthesis, expression is induced by mycophenolic acid resulting in resistance to the drug, expression is repressed by nutrient limitation; IMD2 has a paralog, YAR073W/YAR075W, that arose from a segmental duplication IMP dehydrogenase IMD2
YAL064W	-2.58429	0.000605114	0.00447861	0.631	0.672	2.01	6.303	No	YAL064W	hypothetical protein; may interact with ribosomes, based on co-purification experiments hypothetical protein
YHL005C	-2.67277	0.00399419	0.0224774	0.289	0.297	2.39	1.401	No	YHL005C	hypothetical protein; conserved among S. cerevisiae strains; YHL005C is not an essential gene hypothetical protein
YOR387C	-2.73758	1.85581e-28	6.78183e-26	31.318	49.522	238.793	317.165	No	YOR387C	hypothetical protein; regulated by the metal-responsive Aft1p transcription factor; highly inducible in zinc-depleted conditions; localizes to the soluble fraction; SWAT-GFP and mCherry fusion proteins localize to the endoplasmic reticulum and vacuole respectively; YOR387C has a paralog, VEL1, that arose from a single-locus duplication hypothetical protein
YBL044W	-3.56067	8.14125e-09	1.88896e-07	0.32	0.683	6.483	5.781	No	YBL044W	hypothetical protein; YBL044W is not an essential protein hypothetical protein
YOR032W-A	-7.53918	2.18487e-06	2.99881e-05	0	0	3.027	2.824	No	YOR032W-A	hypothetical protein; SWAT-GFP and seamless-GFP fusion proteins localize to the endoplasmic reticulum; identified by gene-trapping, microarray-based expression analysis, and genome-wide homology searching hypothetical protein
YAR020C	-10.649	1.09288e-08	2.47676e-07	0	0	13.554	37.208	No	PAU7	Member of the seripauperin multigene family; active during alcoholic fermentation, regulated by anaerobiosis, inhibited by oxygen, repressed by heme seripauperin PAU7
YGR146C-A	-11.6646	1.6481e-15	1.41713e-13	0	0	43.455	59.297	No	YGR146C-A	hypothetical protein

## Sheet: P169A  vs. WT
Gene ID	log2(Fold_change)	p-value	FDR p-value correction	mRNA expression level at Normal condition				YEASTRACT 2019 TF	Gene	Gene Function
				Spt15 mutant strain P169A		Wild type strain BY4741
				Duplicate#1	Duplicate#2	Duplicate#1	Duplicate#2
YMR046C	10.7783	2.13237e-13	7.34788e-12	30.34	25.49	0	0	No	YMR046C	Retrotransposon TYA Gag gene co-transcribed with TYB Pol; translated as TYA or TYA-TYB polyprotein; Gag is a nucleocapsid protein that is the structural constituent of virus-like particles (VLPs); similar to retroviral Gag gag protein
YBL005W-A	10.5088	8.72963e-13	2.76016e-11	23.051	23.291	0	0	No	YBL005W-A	Retrotransposon TYA Gag gene co-transcribed with TYB Pol; translated as TYA or TYA-TYB polyprotein; Gag is a nucleocapsid protein that is the structural constituent of virus-like particles (VLPs); similar to retroviral Gag gag protein
RNA170	10.1252	1.36136e-11	3.70924e-10	22.894	12.572	0	0	No	RNA170	- -
YPR158C-C	9.2549	4.35798e-10	9.11751e-09	35.569	17.15	0.074	0	No	YPR158C-C	Retrotransposon TYA Gag gene co-transcribed with TYB Pol; translated as TYA or TYA-TYB polyprotein; Gag is a nucleocapsid protein that is the structural constituent of virus-like particles (VLPs); similar to retroviral Gag gag protein
YMR230W-A	8.11636	1.96836e-07	2.36769e-06	4.21	4.615	0	0	No	YMR230W-A	hypothetical protein
YNL339C	7.96959	2.79373e-07	3.21525e-06	4.859	16.733	0	0.122	No	YRF1-6	Helicase encoded by the Y' element of subtelomeric regions; highly expressed in the mutants lacking the telomerase component TLC1; potentially phosphorylated by Cdc28p Y' element ATP-dependent helicase protein 1 copy 6
YDR039C	7.96172	4.69767e-07	5.12457e-06	3.227	4.642	0	0	No	ENA2	P-type ATPase sodium pump; involved in Na+ efflux to allow salt tolerance; likely not involved in Li+ efflux Na(+)-exporting P-type ATPase ENA2
YPL038W-A	7.9448	4.47466e-07	4.92718e-06	3.765	4.124	0	0	No	YPL038W-A	hypothetical protein; identified by fungal homology and RT-PCR hypothetical protein
YLR157W-D	5.9087	5.84403e-13	1.92328e-11	11.053	9.683	0.147	0.167	No	YLR157W-A	hypothetical protein; identified by gene-trapping, microarray-based expression analysis, and genome-wide homology searching; YLR157W-D has a paralog, YLR161W, that arose from a segmental duplication hypothetical protein
YMR325W	3.87445	2.23631e-09	4.0185e-08	8.327	5.632	0.662	0.311	No	PAU19	hypothetical protein; member of the seripauperin multigene family encoded mainly in subtelomeric regions seripauperin PAU19
YFL066C	3.41114	1.87751e-05	0.00013852	2.522	8.602	0.711	0.322	No	YFL066C	Helicase-like protein encoded within the telomeric Y' element; induced by treatment with 8-methoxypsoralen and UVA irradiation; SWAT-GFP and mCherry fusion proteins localize to the nucleus Y' element ATP-dependent helicase
YOR394W	3.39986	1.431e-25	2.04459e-23	43.97	29.132	3.983	3.013	No	PAU21	hypothetical protein; member of the seripauperin multigene family encoded mainly in subtelomeric regions; SWAT-GFP, seamless-GFP and mCherry fusion proteins localize to the cytosol; identical to Pau22p; encodes two proteins that are translated from 2 different start codons seripauperin PAU21
YPL282C	3.39986	1.431e-25	2.04459e-23	43.97	29.132	3.983	3.013	No	PAU22	hypothetical protein; member of the seripauperin multigene family encoded mainly in subtelomeric regions; SWAT-GFP fusion protein localizes to the endoplasmic reticulum and vacuole, while mCherry fusion localizes to just the vacuole; identical to Pau21p; encodes two proteins that are translated from two different start codons seripauperin PAU22
YFL031W	3.19764	1.03519e-09	1.99478e-08	12925.2	10063	1688.09	826.018	Yes	HAC1	Basic leucine zipper (bZIP) transcription factor (ATF/CREB1 homolog); regulates the unfolded protein response, via UPRE binding, and membrane biogenesis; ER stress-induced splicing pathway facilitates efficient Hac1p synthesis; two functional forms of Hac1p are produced; translation initiation is repressed under non-stress conditions; protein abundance increases in response to DNA replication str…
YFL067W	2.98172	2.59813e-09	4.6261e-08	10.061	28.315	2.819	2.068	No	YFL067W	hypothetical protein; down-regulated at low calcium levels; mCherry fusion protein localizes to the vacuole hypothetical protein
YNR051C	2.74159	2.11055e-79	6.1818e-76	338.196	314.849	46.825	51.049	No	BRE5	Ubiquitin protease cofactor; forms deubiquitination complex with Ubp3p that coregulates anterograde and retrograde transport between the endoplasmic reticulum and Golgi compartments; null is sensitive to brefeldin A Bre5p
YDR449C	2.6582	6.96874e-25	9.27792e-23	54.624	49.489	6.483	10.016	No	UTP6	Nucleolar protein; component of the small subunit (SSU) processome containing the U3 snoRNA that is involved in processing of pre-18S rRNA snoRNA-binding rRNA-processing protein UTP6
YER137C	2.64722	7.47951e-18	4.33812e-16	33.659	25.144	3.946	5.458	No	YER137C	hypothetical protein
YBR301W	2.57275	0.00061773	0.00302817	7.288	3.207	1.422	0.334	No	PAU24	Cell wall mannoprotein; has similarity to Tir1p, Tir2p, Tir3p, and Tir4p; member of the seripauperin multigene family encoded mainly in subtelomeric regions; expressed under anaerobic conditions, completely repressed during aerobic growth seripauperin PAU24
YNL162W-A	2.53954	1.50129e-11	3.99753e-10	66.549	38.216	5.649	12.351	No	YNL162W-A	hypothetical protein; identified by homology hypothetical protein
YMR269W	2.51483	2.74737e-29	4.877e-27	69.349	67.784	9.951	14.018	No	TMA23	Nucleolar protein implicated in ribosome biogenesis; deletion extends chronological lifespan Tma23p
YLR307C-A	2.46005	6.2594e-06	5.28351e-05	11.303	7.004	0.858	2.435	No	YLR307C-A	hypothetical protein
YHR033W	2.39379	1.83939e-35	6.73447e-33	91.622	80.684	17.61	15.263	No	YHR033W	hypothetical protein; epitope-tagged protein localizes to the cytoplasm; YHR033W has a paralog, PRO1, that arose from the whole genome duplication putative glutamate 5-kinase
YEL048C	2.39255	7.17635e-24	9.03091e-22	84.853	92.275	13.076	20.622	No	TCA17	Component of transport protein particle (TRAPP) complex II; TRAPPII is a multimeric guanine nucleotide-exchange factor for the GTPase Ypt1p, regulating intra-Golgi and endosome-Golgi traffic; promotes association of TRAPPII-specific subunits with the TRAPP core complex; sedlin related; human Sedlin mutations cause SEDT, a skeletal disorder Tca17p
YCL037C	2.39	2.7657e-06	2.50796e-05	5.795	9.556	1.385	1.59	No	SRO9	Cytoplasmic RNA-binding protein; shuttles between nucleus and cytoplasm and is exported from the nucleus in an mRNA export-dependent manner; associates with translating ribosomes; involved in heme regulation of Hap1p as a component of the HMC complex, also involved in the organization of actin filaments; contains a La motif; SRO9 has a paralog, SLF1, that arose from the whole genome duplication S…
YPL024W	2.38872	9.27833e-52	6.79406e-49	190.81	170.433	34.043	35.107	No	RMI1	Subunit of the RecQ (Sgs1p) - Topo III (Top3p) complex; stimulates superhelical relaxing, DNA catenation/decatenation and ssDNA binding activities of Top3p; involved in response to DNA damage; functions in S phase-mediated cohesion establishment via a pathway involving the Ctf18-RFC complex and Mrc1p; stimulates Top3p DNA catenation/decatenation activity; null mutants display increased rates of r…
YKR093W	2.3864	4.71467e-37	1.97275e-34	103.592	89.922	19.656	17.465	No	PTR2	Integral membrane peptide transporter; mediates transport of di- and tri-peptides; conserved protein that contains 12 transmembrane domains; PTR2 expression is regulated by the N-end rule pathway via repression by Cup9p Ptr2p
YGL029W	2.35188	2.18796e-15	9.7099e-14	59.641	71.954	8.848	16.987	No	CGR1	Protein involved in nucleolar integrity and processing of pre-rRNA; has a role in processing rRNA for the 60S ribosome subunit; transcript is induced in response to cytotoxic stress but not genotoxic stress; relocalizes from nucleus to nucleolus upon DNA replication stress Cgr1p
YMR323W	2.33476	4.29142e-13	1.43652e-11	16.616	18.231	3.603	3.313	No	ERR3	Enolase, a phosphopyruvate hydratase; catalyzes the conversion of 2-phosphoglycerate to phosphoenolpyruvate; complements the growth defect of an ENO1 ENO2 double mutant in glucose phosphopyruvate hydratase ERR3
YPR078C	2.26771	3.07139e-16	1.48696e-14	25.342	23.691	4.89	5.336	No	YPR078C	hypothetical protein; possible role in DNA metabolism and/or in genome stability; expression is heat-inducible hypothetical protein
YKL161C	2.2444	1.1886e-34	3.86823e-32	75.2	76.986	15.784	16.397	No	KDX1	Protein kinase; implicated in Slt2p mitogen-activated (MAP) kinase signaling pathway; interacts with numerous components in the mating pheromone and CWI MAPK pathways; associates with Rlm1p; KDX1 has a paralog, SLT2, that arose from the whole genome duplication putative protein kinase KDX1
YOR308C	2.22049	6.11816e-12	1.73141e-10	20.233	21.82	3.48	5.547	No	SNU66	Component of the U4/U6.U5 snRNP complex; involved in pre-mRNA splicing via spliceosome; also required for pre-5S rRNA processing and may act in concert with Rnh70p; has homology to human SART-1 U4/U6-U5 snRNP complex subunit SNU66
YDR077W	2.19393	1.01323e-49	6.59499e-47	7829.78	8310.32	1953.21	1583.18	No	SED1	Major stress-induced structural GPI-cell wall glycoprotein; associates with translating ribosomes, possible role in mitochondrial genome maintenance; ORF contains two distinct variable minisatellites; SED1 has a paralog, SPI1, that arose from the whole genome duplication Sed1p
YLR223C	2.19379	9.32147e-20	7.28069e-18	36.357	34.301	7.23	8.293	Yes	IFH1	Coactivator, regulates transcription of ribosomal protein (RP) genes; recruited to RP gene promoters during optimal growth conditions via Fhl1p; subunit of CURI, a complex that coordinates RP production and pre-rRNA processing; regulated by acetylation and phosphorylation at different growth states via TORC1 signaling; IFH1 has a paralog, CRF1, that arose from the whole genome duplication Ifh1p
YLR307W	2.18379	2.94913e-05	0.000207926	5.406	6.023	1.213	1.29	No	CDA1	Chitin deacetylase; together with Cda2p involved in the biosynthesis ascospore wall component, chitosan; required for proper rigidity of the ascospore wall chitin deacetylase CDA1
YIL054W	2.1812	1.46552e-06	1.41201e-05	8.243	8.893	1.471	2.301	No	YIL054W	hypothetical protein; expressed at both mRNA and protein levels hypothetical protein
YCR020W-B	2.17004	0.000238874	0.0013455	166.052	171.405	22.218	52.85	No	HTL1	Component of the RSC chromatin remodeling complex; RSC functions in transcriptional regulation and elongation, chromosome stability, and establishing sister chromatid cohesion; involved in telomere maintenance Htl1p
YKL102C	2.15791	5.02604e-09	8.4605e-08	11.702	16.469	3.26	3.068	No	YKL102C	hypothetical protein; conserved across S. cerevisiae strains; deletion confers sensitivity to citric acid; predicted protein would include a thiol-disulfide oxidoreductase active site hypothetical protein
YIR013C	2.15399	2.46111e-08	3.52499e-07	17.887	11.891	2.782	3.924	Yes	GAT4	Protein containing GATA family zinc finger motifs; involved in spore wall assembly; sequence similarity to GAT3, and the double mutant gat3 gat4 exhibits reduced dityrosine fluorescence relative to the single mutants Gat4p
YDR274C	2.09705	2.19443e-30	4.14676e-28	85.344	76.877	19.448	18.61	No	YDR274C	hypothetical protein; conserved among S. cerevisiae strains; YDR274C is not an essential gene hypothetical protein
YNL227C	2.07872	1.17871e-22	1.23302e-20	52.983	49.408	11.188	13.062	No	JJJ1	Co-chaperone that stimulates the ATPase activity of Ssa1p; required for a late step of ribosome biogenesis; associated with the cytosolic large ribosomal subunit; contains a J-domain; mutation causes defects in fluid-phase endocytosis Jjj1p
YMR182C	1.98895	3.82852e-18	2.28849e-16	380.182	272.3	97.975	67.013	Yes	RGM1	Putative zinc finger DNA binding transcription factor; contains two N-terminal C2H2 zinc fingers and C-terminal proline rich domain; overproduction impairs cell growth and induces expression of genes involved in monosaccharide catabolism and aldehyde metabolism; regulates expression of of Y' telomeric elements and subtelomeric COS genes; relocalizes to the cytosol in response to hypoxia; RGM1 has…
YOL165C	1.96638	3.99887e-12	1.16544e-10	21.883	21.057	5.968	5.125	No	AAD15	Putative aryl-alcohol dehydrogenase; similar to P. chrysosporium aryl-alcohol dehydrogenase; mutational analysis has not yet revealed a physiological role; AAD15 has a paralog, AAD3, that arose from a segmental duplication; members of the AAD gene family comprise three pairs (AAD3 + AAD15, AAD6/AAD16 + AAD4, AAD10 + AAD14) whose two genes are more related to one another than to other members of t…
YNL308C	1.95346	7.47915e-27	1.21702e-24	75.738	79.257	18.958	21.144	No	KRI1	Essential nucleolar protein required for 40S ribosome biogenesis; associate with snR30; physically and functionally interacts with Krr1p Kri1p
YKL163W	1.94885	2.03861e-17	1.11609e-15	133.811	124.713	41.335	25.869	No	PIR3	O-glycosylated covalently-bound cell wall protein; required for cell wall stability; expression is cell cycle regulated, peaking in M/G1 and also subject to regulation by the cell integrity pathway; coding sequence contains length polymorphisms in different strains; PIR3 has a paralog, HSP150, that arose from the whole genome duplication beta-1,3-glucan linked protein
YCL058W-A	1.93	1.65081e-13	5.79069e-12	31.119	34.828	7.255	9.994	No	ADF1	Transcriptional repressor encoded by the FYV5 antisense strand; negatively regulates transcription of FYV5 by binding to the promoter on the sense strand Adf1p
YDR405W	1.91574	5.79898e-33	1.47697e-30	221.196	213.645	52.376	63.044	No	MRP20	Mitochondrial ribosomal protein of the large subunit mitochondrial 54S ribosomal protein YmL41
YDR309C	1.89965	2.75541e-28	4.74741e-26	101.951	115.203	30.587	27.792	No	GIC2	Redundant rho-like GTPase Cdc42p effector; involved in initiation of budding and cellular polarization; interacts with Cdc42p via the Cdc42/Rac-interactive binding (CRIB) domain and with PI(4,5)P2 via a polybasic region; GIC2 has a paralog, GIC1, that arose from the whole genome duplication Gic2p
RUF23	1.8726	0.00171123	0.00727989	6.491	4.033	1.985	0.934	No	RUF23	- -
YDR111C	1.8684	2.5308e-31	5.11221e-29	183.651	164.401	50.771	44.823	No	ALT2	Catalytically inactive alanine transaminase; expression is repressed in the presence of alanine and repression is mediated by Nrg1p; ALT2 has a paralog, ALT1, that arose from the whole genome duplication alanine transaminase ALT2
YGR077C	1.85039	2.13528e-25	2.90895e-23	197.541	158.379	52.168	46.802	No	PEX8	Intraperoxisomal organizer of the peroxisomal import machinery; organizes the formation of the importomer complex, bridging the docking complex with the RING finger complex; tightly associated with the lumenal face of the peroxisomal membrane; essential for peroxisome biogenesis; binds PTS1-signal receptor Pex5p, and PTS2-signal receptor Pex7p Pex8p
YHR146W	1.84501	7.62726e-36	2.9787e-33	193.461	181.352	53.932	50.704	No	CRP1	Protein that binds to cruciform DNA structures; CRP1 has a paralog, MDG1, that arose from the whole genome duplication Crp1p
YKR092C	1.79202	1.1557e-16	5.73736e-15	39.065	39.906	11.47	11.328	No	SRP40	Nucleolar serine-rich protein; role in preribosome assembly or transport; may function as a chaperone of small nucleolar ribonucleoprotein particles (snoRNPs); immunologically and structurally to rat Nopp140 Srp40p
YPL013C	1.78206	3.24093e-15	1.40632e-13	614.748	546.472	128.22	209.942	No	MRPS16	Mitochondrial ribosomal protein of the small subunit mitochondrial 37S ribosomal protein MRPS16
YDR528W	1.75823	8.42471e-12	2.36134e-10	30.293	30.667	10.453	7.704	No	HLR1	Protein involved in regulation of cell wall composition and integrity; also involved in cell wall response to osmotic stress; overproduction suppresses a lysis sensitive PKC mutation; HLR1 has a paralog, LRE1, that arose from the whole genome duplication Hlr1p
YPR143W	1.74765	1.73951e-19	1.27376e-17	54.643	53.595	16.397	15.964	No	RRP15	Nucleolar protein; constituent of pre-60S ribosomal particles; required for proper processing of the 27S pre-rRNA at the A3 and B1 sites to yield mature 5.8S and 25S rRNAs Rrp15p
YJR097W	1.74618	9.12653e-06	7.35395e-05	9.217	12.736	2.868	3.713	No	JJJ3	hypothetical protein; contains a CSL Zn finger and a DnaJ-domain; involved in diphthamide biosynthesis; ortholog human Dph4 Jjj3p
YDR381W	1.74336	5.66219e-41	2.76409e-38	1302.56	1173.23	364.463	376.707	No	YRA1	Nuclear polyadenylated RNA-binding protein; required for export of poly(A)+ mRNA from the nucleus; proposed to couple mRNA export with 3' end processing via its interactions with Mex67p and Pcf11p; interacts with DBP2; inhibits the helicase activity of Dbp2; functionally redundant with Yra2p, another REF family member RNA-binding protein YRA1
YAR066W	1.73937	6.979e-06	5.82378e-05	10.645	11.419	2.561	3.991	No	YAR066W	Putative GPI protein; SWAT-GFP and mCherry fusion proteins localize to the endoplasmic reticulum and vacuole respectively; YAR066W has a paralog, YHR214W, that arose from a segmental duplication hypothetical protein
YKR105C	1.73903	8.29599e-14	2.98147e-12	32.287	33.093	9.35	10.283	No	VBA5	Plasma membrane protein of the Major Facilitator Superfamily (MFS); involved in amino acid uptake and drug sensitivity; VBA5 has a paralog, VBA3, that arose from a segmental duplication basic amino acid transporter
YIL009W	1.71085	1.58048e-14	6.29825e-13	41.643	39.706	13.615	11.295	No	FAA3	Long chain fatty acyl-CoA synthetase; activates imported fatty acids with a preference for C16:0-C18:0 chain lengths; green fluorescent protein (GFP)-fusion protein localizes to the cell periphery long-chain fatty acid-CoA ligase FAA3
YAR071W	1.7019	5.2805e-11	1.28353e-09	25.036	24.536	8.198	7.137	No	PHO11	One of three repressible acid phosphatases; glycoprotein that is transported to the cell surface by the secretory pathway; induced by phosphate starvation and coordinately regulated by PHO4 and PHO2; PHO11 has a paralog, PHO12, that arose from a segmental duplication acid phosphatase PHO11
YOR237W	1.68051	0.00380634	0.0142295	5.072	3.525	1.189	1.545	No	HES1	Protein implicated in the regulation of ergosterol biosynthesis; one of a seven member gene family with a common essential function and non-essential unique functions; similar to human oxysterol binding protein (OSBP); SWAT-GFP and mCherry fusion proteins localize to the bud neck and vacuolar membrane; HES1 has a paralog, KES1, that arose from the whole genome duplication oxysterol-binding protei…
YLR145W	1.67836	2.31028e-17	1.24162e-15	75.181	69.492	20.122	25.102	No	RMP1	Subunit of RNase MRP; RNase MRP processes pre-rRNA and has a role in cell cycle-regulated degradation of daughter cell-specific mRNAs; unlike most subunits, not shared between RNase MRP and nuclear RNase P Rmp1p
YBL112C	1.67088	0.000671551	0.00324583	23.005	8.239	5.943	3.935	No	YBL112C	hypothetical protein; YBL112C is contained within TEL02L hypothetical protein
YLR063W	1.66889	2.00239e-07	2.39387e-06	17.627	16.814	4.436	6.47	No	BMT6	Methyltransferase required for m3U2843 methylation of the 25S rRNA; S-adenosylmethionine-dependent; green fluorescent protein (GFP)-fusion protein localizes to the cytoplasm; YLR063W is not an essential gene 25S rRNA (uracil2843-N3)-methyltransferase
YMR014W	1.6659	1.10921e-07	1.40644e-06	16.357	17.795	4.595	6.192	No	BUD22	Protein required for rRNA maturation and ribosomal subunit biogenesis; required for 18S rRNA maturation; also required for small ribosomal subunit biogenesis; cosediments with pre-ribosomal particles; mutation decreases efficiency of +1 Ty1 frameshifting and transposition, and affects budding pattern Bud22p
YER180C-A	1.66325	1.38494e-19	1.05363e-17	78.844	87.451	24.325	28.192	No	SLO1	Protein interacting with Arl3p; Arl3p is a GTPase of the Ras superfamily involved in vesicle-tethering at the Golgi; putative ortholog of human SCOCO Slo1p
YPL088W	1.62046	1.28174e-23	1.56426e-21	102.721	108.862	35.624	33.406	No	YPL088W	Putative aryl alcohol dehydrogenase; transcription is activated by paralogous transcription factors Yrm1p and Yrr1p along with genes involved in multidrug resistance aldo-keto reductase superfamily protein
YNL289W	1.60589	8.67953e-23	9.40554e-21	147.618	151.32	53.761	44.757	No	PCL1	Cyclin, interacts with cyclin-dependent kinase Pho85p; member of the Pcl1,2-like subfamily, involved in the regulation of polarized growth and morphogenesis and progression through the cell cycle; is ubiquitinated by Dma1p; phosphorylation by Pho85p targets it for degradation; localizes to sites of polarized cell growth Pcl1p
YBL028C	1.59709	6.53848e-20	5.176e-18	100.523	92.475	34.325	29.638	No	YBL028C	hypothetical protein that may interact with ribosomes; green fluorescent protein (GFP)-fusion protein localizes to the nucleolus; predicted to be involved in ribosome biogenesis hypothetical protein
YOR305W	1.597	1.08586e-18	7.31144e-17	108.766	108.462	31.911	39.965	No	RRG7	hypothetical protein; green fluorescent protein (GFP)-fusion protein localizes to the mitochondrion; deletion confers sensitivity to 4-(N-(S-glutathionylacetyl)amino) phenylarsenoxide (GSAO); YOR305W is not an essential gene Rrg7p
YDL213C	1.58868	4.03138e-23	4.63055e-21	100.245	99.233	32.953	33.506	No	NOP6	rRNA-binding protein required for 40S ribosomal subunit biogenesis; contains an RNA recognition motif (RRM); hydrophilin essential to overcome the stress of the desiccation-rehydration process; NOP6 may be a fungal-specific gene as no homologs have been yet identified in higher eukaryotes Nop6p
YHR143W-A	1.58433	1.61238e-14	6.38197e-13	64.564	55.094	21.727	18.31	No	RPC10	RNA polymerase subunit ABC10-alpha, found in RNA pol I, II, and III; relocalizes from nucleolus to cytoplasm upon DNA replication stress DNA-directed RNA polymerase core subunit RPC10
YJL148W	1.5677	4.51709e-18	2.64611e-16	72.641	70.773	22.843	25.602	No	RPA34	RNA polymerase I subunit A34.5; essential for nucleolar assembly and for high polymerase loading rate; nucleolar localization depends on Rpa49p DNA-directed RNA polymerase I subunit RPA34
YEL057C	1.56321	2.36772e-14	9.12506e-13	53.901	65.677	19.325	21.222	No	SDD1	hypothetical protein; overproduction suppresses lethality due to expression of the dominant PET9 allele AAC2-A128P; may have a role in telomere maintenance; target of UME6 regulation Sdd1p
YJL107C	1.54789	4.82338e-07	5.23247e-06	20.038	18.241	7.782	5.369	No	YJL107C	hypothetical protein; expression is induced by activation of the HOG1 mitogen-activated signaling pathway and this induction is Hog1p/Pbs2p dependent; YJL107C and adjacent ORF, YJL108C are merged in related fungi hypothetical protein
YKL082C	1.5452	4.17787e-11	1.03266e-09	29.533	33.429	10.747	10.85	No	RRP14	Essential protein, constituent of 66S pre-ribosomal particles; interacts with proteins involved in ribosomal biogenesis and cell polarity; member of the SURF-6 family ribosome biosynthesis protein RRP14
YPR193C	1.54511	4.50096e-05	0.000300646	16.802	10.165	4.657	4.58	No	HPA2	Tetrameric histone acetyltransferase; has similarity to Gcn5p, Hat1p, Elp3p, and Hpa3p; acetylates histones H3 and H4 in vitro and exhibits autoacetylation activity; also acetylates polyamines histone acetyltransferase
YDR098C-A	1.54229	1.35863e-07	1.70061e-06	145.365	114.676	59.839	29.782	No	YDR098C-A	Retrotransposon TYA Gag gene co-transcribed with TYB Pol; translated as TYA or TYA-TYB polyprotein; Gag is a nucleocapsid protein that is the structural constituent of virus-like particles (VLPs); similar to retroviral Gag gag protein
YBR056W-A	1.54051	3.07058e-19	2.19359e-17	361.173	284.918	118.146	104.554	No	YBR056W-A	hypothetical protein; mRNA identified as translated by ribosome profiling data; partially overlaps dubious ORF YBR056C-B; YBR056W-A has a paralog, YDR034W-B, that arose from the whole genome duplication hypothetical protein
YDR365C	1.53922	1.72151e-19	1.27376e-17	110.843	118.046	36.225	42.667	No	ESF1	Nucleolar protein involved in pre-rRNA processing; depletion causes severely decreased 18S rRNA levels Esf1p
YPR174C	1.52086	1.11111e-15	5.16577e-14	62.664	68.002	21.188	24.368	No	YPR174C	hypothetical protein; green fluorescent protein (GFP)-fusion protein localizes to the nuclear periphery; potential Cdc28p substrate; binds phosphatidylinositols and phosphatidylethanolamine in a large-scale study; relative distribution to foci at the nuclear periphery increases upon DNA replication stress; YPR174C has a paralog, NBP1, that arose from the whole genome duplication hypothetical prot…
YOL159C-A	1.52082	1.37331e-06	1.32972e-05	95.776	88.132	19.975	44.156	No	YOL159C-A	hypothetical protein; overexpression affects endocytic protein trafficking; identified by sequence comparison with hemiascomycetous yeast species hypothetical protein
YKR091W	1.50454	1.49425e-25	2.08413e-23	167.313	175.947	61.555	59.742	No	SRL3	GTB motif (G1/S transcription factor binding) containing protein; binds SBF-regulated promoters in hydroxyurea-treated cells; when overexpressed, suppresses the lethality of a rad53 null mutation; potential Cdc28p substrate; SRL3 has a paralog, WHI5, that arose from the whole genome duplication DNA-binding protein SRL3
YDR398W	1.49456	5.35324e-14	1.97228e-12	45.945	47.981	16.458	16.964	No	UTP5	Subunit of U3-containing Small Subunit (SSU) processome complex; involved in production of 18S rRNA and assembly of small ribosomal subunit Utp5p
YIL117C	1.49282	1.31266e-19	1.01179e-17	95.127	98.879	36.249	32.873	No	PRM5	Pheromone-regulated protein, predicted to have 1 transmembrane segment; induced during cell integrity signaling; PRM5 has a paralog, YNL058C, that arose from the whole genome duplication pheromone-regulated protein PRM5
YIL079C	1.49141	6.40459e-11	1.51895e-09	31.415	34.201	12.181	11.172	No	AIR1	Zinc knuckle protein; involved in nuclear RNA processing and degradation as a component of the TRAMP complex; stimulates the poly(A) polymerase activity of Pap2p in vitro; AIR1 has a paralog, AIR2, that arose from the whole genome duplication; although Air1p and Air2p are homologous TRAMP subunits, they have nonredundant roles in regulation of substrate specificity of the exosome TRAMP complex RN…
YPR168W	1.48748	1.02378e-12	3.15648e-11	39.482	40.841	14.228	14.552	No	NUT2	Subunit of the RNA polymerase II mediator complex; conserved from yeast to human; associates with core polymerase subunits to form the RNA polymerase II holoenzyme; required for transcriptional activation and has a role in basal transcription; protein abundance increases in response to DNA replication stress mediator complex subunit NUT2
YLL066C	1.48146	1.33902e-11	3.6654e-10	35.041	34.701	12.757	12.273	No	YLL066C	Putative Y' element ATP-dependent helicase; YLL066C is not an essential gene Y' element ATP-dependent helicase
YPR007C	1.46633	0.000249881	0.0013941	9.133	9.302	4.007	2.657	No	REC8	Meiosis-specific component of the sister chromatid cohesion complex; alpha-kleisin family member that maintains cohesion between sister chromatids during meiosis I; maintains cohesion between centromeres of sister chromatids until meiosis II; independent of its role in sister chromatid cohesion, Rec8p promotes allelic collisions and prevents nonspecific chromosome interactions; homolog of S. pomb…
YDL173W	1.45551	2.99624e-10	6.5249e-09	93.94	86.07	40.06	25.78	No	PAR32	hypothetical protein; hyperphosphorylated upon rapamycin treatment in a Tap42p-dependent manner; green fluorescent protein (GFP)-fusion protein localizes to the cytoplasm; PAR32 is not an essential gene Par32p
YLR175W	1.45274	7.24569e-24	9.03091e-22	298.695	265.069	105.757	100.73	No	CBF5	Pseudouridine synthase catalytic subunit of box H/ACA snoRNPs; acts on large and small rRNAs, on snRNA U2, and on some mRNAs; mutations in human ortholog dyskerin cause the disorder dyskeratosis congenita; small nucleolar ribonucleoprotein particles are also known as snoRNPs pseudouridine synthase CBF5
YHR209W	1.45126	1.46106e-18	9.61675e-17	115.313	126.085	47.266	41.255	No	CRG1	S-AdoMet-dependent methyltransferase involved in lipid homeostasis; mediates resistance to a drug cantharidin S-adenosylmethionine-dependent methyltransferase
YIR014W	1.44616	6.0928e-09	9.88688e-08	27.623	25.017	9.166	10.216	No	YIR014W	hypothetical protein; green fluorescent protein (GFP)-fusion protein localizes to the vacuole; expression directly regulated by the metabolic and meiotic transcriptional regulator Ume6p; YIR014W is a non-essential gene hypothetical protein
YCR063W	1.42397	2.46852e-06	2.25662e-05	16.616	21.783	6.495	7.871	No	BUD31	Component of the SF3b subcomplex of the U2 snRNP; increases efficiency of first and second step pre-mRNA splicing; diploid mutants display a random budding pattern instead of the wild-type bipolar pattern; facilitates passage through G1/S Start, but is not required for G2/M transition or exit from mitosis U2 snRNP complex subunit BUD31
YGL056C	1.42286	1.22509e-17	6.90058e-16	81.895	81.456	30.747	30.327	No	SDS23	Protein involved in cell separation during budding; one of two S. cerevisiae homologs (Sds23p and Sds24p) of the S. pombe Sds23 protein, which is implicated in APC/cyclosome regulation; SDS23 has a paralog, SDS24, that arose from the whole genome duplication Sds23p
YMR052W	1.41736	1.02589e-07	1.30645e-06	29.514	29.241	8.946	13.051	No	FAR3	hypothetical protein; involved in recovery from cell cycle arrest in response to pheromone, in a Far1p-independent pathway; interacts with Far7p, Far8p, Far9p, Far10p, and Far11p; localizes to the endoplasmic reticulum; protein abundance increases in response to DNA replication stress Far3p
YCL054W	1.41129	2.65172e-05	0.000189527	11.498	12.836	4.387	4.758	No	SPB1	AdoMet-dependent methyltransferase; involved in rRNA processing and 60S ribosomal subunit maturation; methylates G2922 in the tRNA docking site of the large subunit rRNA and in the absence of snR52, U2921; suppressor of PAB1 mutants 27S pre-rRNA (guanosine2922-2'-O)-methyltransferase
YDR403W	1.40824	1.51561e-05	0.000115155	13.102	14.071	4.595	5.658	No	DIT1	Sporulation-specific enzyme required for spore wall maturation; involved in the production of a soluble LL-dityrosine-containing precursor of the spore wall; transcripts accumulate at the time of prospore enclosure Dit1p
YPL093W	1.40795	2.64535e-11	6.88733e-10	44.564	42.804	15.134	17.854	No	NOG1	Putative GTPase; associates with free 60S ribosomal subunits in the nucleolus and is required for 60S ribosomal subunit biogenesis; constituent of 66S pre-ribosomal particles; member of the ODN family of nucleolar G-proteins putative GTPase NOG1
YCR020C	1.39875	3.11359e-13	1.0543e-11	58.556	52.723	20.771	21.533	No	PET18	hypothetical protein; has weak similarity to proteins involved in thiamin metabolism; expression is induced in the absence of thiamin Pet18p
YBL054W	1.39773	4.29522e-05	0.000287559	11.081	11.673	4.326	4.324	Yes	TOD6	PAC motif binding protein involved in rRNA and ribosome biogenesis; subunit of the RPD3L histone deacetylase complex; Myb-like HTH transcription factor; hypophosphorylated by rapamycin treatment in a Sch9p-dependent manner; activated in stochastic pulses of nuclear localization Tod6p
YPL187W	1.39597	0.000193106	0.0011134	10.951	16.914	4.424	6.148	No	MF(ALPHA)1	Mating pheromone alpha-factor, made by alpha cells; interacts with mating type a cells to induce cell cycle arrest and other responses leading to mating; also encoded by MF(ALPHA)2, although MF(ALPHA)1 produces most alpha-factor; binds copper(II) ions Mf(alpha)1p
YDR184C	1.39354	2.09468e-08	3.09864e-07	25.778	24.981	10.306	9.049	No	ATC1	Nuclear protein; possibly involved in regulation of cation stress responses and/or in the establishment of bipolar budding pattern; relative distribution to the nucleus decreases upon DNA replication stress Atc1p
YAL025C	1.39312	5.16662e-10	1.07326e-08	48.449	52.95	16.421	22.223	No	MAK16	Essential nuclear protein; constituent of 66S pre-ribosomal particles; required for maturation of 25S and 5.8S rRNAs; required for maintenance of M1 satellite double-stranded RNA of the L-A virus ribosome biosynthesis protein MAK16
YOR371C	1.3921	5.22477e-08	6.95607e-07	43.321	30.531	14.081	14.096	No	GPB1	Multistep regulator of cAMP-PKA signaling; inhibits PKA downstream of Gpa2p and Cyr1p, thereby increasing cAMP dependency; promotes ubiquitin-dependent proteolysis of Ira2p; regulated by G-alpha protein Gpa2p; GPB1 has a paralog, GPB2, that arose from the whole genome duplication Gpb1p
YER180C	1.38142	5.29447e-17	2.74469e-15	131.095	113.177	46.604	47.358	No	ISC10	Protein required for sporulation; transcript is induced 7.5 hours after induction of meiosis, expected to play significant role in the formation of reproductive cells Isc10p
YNL190W	1.37322	3.15667e-09	5.53645e-08	844.957	885.575	424.266	245.805	No	YNL190W	Hydrophilin essential in desiccation-rehydration process; cell wall protein; contains a putative GPI-attachment site hypothetical protein
YIR042C	1.35875	1.15204e-10	2.65336e-09	40.771	38.143	16.078	14.774	No	YIR042C	hypothetical protein; YIR042C is a non-essential gene hypothetical protein
YHR148W	1.35842	6.71576e-05	0.000430426	19.556	19.794	5.368	9.916	No	IMP3	Component of the SSU processome; SSU processome is required for pre-18S rRNA processing, essential protein that interacts with Mpp10p and mediates interactions of Imp4p and Mpp10p with U3 snoRNA snoRNA-binding rRNA-processing protein IMP3
YKL221W	1.35666	0.000591272	0.00292047	9.254	7.948	3.064	3.657	No	MCH2	Protein with similarity to mammalian monocarboxylate permeases; monocarboxylate permeases are involved in transport of monocarboxylic acids across the plasma membrane but mutant is not deficient in monocarboxylate transport Mch2p
YLR197W	1.35457	2.44115e-14	9.34659e-13	206.768	160.858	74.361	69.758	No	NOP56	Essential evolutionarily-conserved nucleolar protein; component of the box C/D snoRNP complexes that direct 2'-O-methylation of pre-rRNA during its maturation; overexpression causes spindle orientation defects snoRNP complex protein NOP56
YCL058C	1.34199	0.00617913	0.0211308	14.335	17.75	2.917	9.761	Yes	FYV5	Protein involved in regulation of the mating pathway; binds with Matalpha2p to promoters of haploid-specific genes; required for survival upon exposure to K1 killer toxin; involved in ion homeostasis Fyv5p
YKL122C	1.33997	7.83507e-07	8.10794e-06	130.158	130.918	35.612	67.635	No	SRP21	Subunit of the signal recognition particle (SRP); SRP functions in protein targeting to the endoplasmic reticulum membrane; not found in mammalian SRP; forms a pre-SRP structure in the nucleolus that is translocated to the cytoplasm signal recognition particle subunit SRP21
YOL068C	1.33408	3.13036e-18	1.89048e-16	192.145	175.638	77.522	68.736	No	HST1	NAD(+)-dependent histone deacetylase; essential subunit of the Sum1p/Rfm1p/Hst1p complex required for ORC-dependent silencing and meiotic repression; non-essential subunit of the Set3C deacetylase complex; involved in telomere maintenance; HST1 has a paralog, SIR2, that arose from the whole genome duplication histone deacetylase HST1
YOL109W	1.32892	3.64293e-19	2.57112e-17	882.752	848.504	380.137	310.817	No	ZEO1	Peripheral membrane protein of the plasma membrane; interacts with Mid2p; regulates the cell integrity pathway mediated by Pkc1p and Slt2p; the authentic protein is detected in a phosphorylated state in highly purified mitochondria Zeo1p
YNR054C	1.32777	4.25559e-07	4.71252e-06	25.119	22.692	8.492	10.528	No	ESF2	Essential nucleolar protein involved in pre-18S rRNA processing; binds to RNA and stimulates ATPase activity of Dbp8; involved in assembly of the small subunit (SSU) processome RNA-binding ATPase activator ESF2
YNL113W	1.32721	2.01613e-12	6.08788e-11	62.858	55.839	23.345	24.068	No	RPC19	RNA polymerase subunit AC19; common to RNA polymerases I and III DNA-directed RNA polymerase core subunit RPC19
YLL011W	1.32662	6.25719e-06	5.28351e-05	19.064	19.776	6.446	9.016	No	SOF1	Protein required for biogenesis of 40S (small) ribosomal subunit; has similarity to the beta subunit of trimeric G-proteins and the splicing factor Prp4p; essential gene rRNA-processing protein SOF1
YKR041W	1.3246	0.0035877	0.0135855	9.504	6.159	2.475	3.769	No	YKR041W	hypothetical protein; localizes to the mitotic spindle; overexpression of YKR041W affects endocytic protein trafficking hypothetical protein
YLR318W	1.32346	1.72835e-06	1.62679e-05	18.183	19.158	7.095	7.86	No	EST2	Reverse transcriptase subunit of the telomerase holoenzyme; essential for telomerase core catalytic activity, involved in other aspects of telomerase assembly and function; mutations in human homolog are associated with aplastic anemia Est2p
YKL096W	1.3162	6.38894e-15	2.73185e-13	451.061	395.651	190.963	150.078	No	CWP1	Cell wall mannoprotein that localizes to birth scars of daughter cells; linked to a beta-1,3- and beta-1,6-glucan heteropolymer through a phosphodiester bond; required for propionic acid resistance Cwp1p
YCR065W	1.31561	2.62841e-10	5.81027e-09	51.054	49.653	22.683	17.987	Yes	HCM1	Forkhead transcription factor; drives S-phase activation of genes involved in chromosome segregation, spindle dynamics, budding; also activates genes involved in respiration, use of alternative energy sources (like proline), NAD synthesis, oxidative stress resistance; key factor in early adaptation to nutrient deficiency and diauxic shift; suppressor of calmodulin mutants with specific SPB assemb…
YJL011C	1.31501	4.78313e-08	6.42651e-07	30.507	32.875	11.225	14.319	No	RPC17	RNA polymerase III subunit C17; physically interacts with C31, C11, and TFIIIB70; may be involved in the recruitment of pol III by the preinitiation complex; protein abundance increases in response to DNA replication stress; relocalizes to the cytosol in response to hypoxia DNA-directed RNA polymerase III subunit RPC17
YGL162W	1.31392	1.38541e-07	1.71943e-06	25.073	23.954	10.49	9.238	Yes	SUT1	Zn(II)2Cys6 family transcription factor; positively regulates sterol uptake genes under anaerobic conditions; involved in hypoxic gene expression; represses filamentation-inducing genes during vegetative growth; positively regulates mating with SUT2 by repressing expression of genes that act as mating inhibitors; repressed by STE12; relocalizes from the nucleus to the cytoplasm upon DNA replicati…
YGR189C	1.31244	7.74812e-13	2.46676e-11	287.661	279.876	133.023	96.194	No	CRH1	Chitin transglycosylase; functions in the transfer of chitin to beta(1-6) and beta(1-3) glucans in the cell wall; similar and functionally redundant to Utr2; localizes to sites of polarized growth; expression induced by cell wall stress transglycosylase
YMR303C	1.31243	5.6855e-11	1.35941e-09	67.949	55.485	24.117	25.736	No	ADH2	Glucose-repressible alcohol dehydrogenase II; catalyzes the conversion of ethanol to acetaldehyde; involved in the production of certain carboxylate esters; regulated by ADR1 alcohol dehydrogenase ADH2
YLL008W	1.30838	1.55255e-06	1.47643e-05	20.353	20.575	7.414	9.071	No	DRS1	Nucleolar DEAD-box protein required for ribosome assembly and function; including synthesis of 60S ribosomal subunits; constituent of 66S pre-ribosomal particles putative ATP-dependent RNA helicase
YPL193W	1.30727	4.84374e-08	6.47823e-07	26.065	25.88	10.404	10.594	No	RSA1	Protein involved in the assembly of 60S ribosomal subunits; functionally interacts with Dbp6p; functions in a late nucleoplasmic step of the assembly Rsa1p
YBL039C	1.29427	3.79349e-10	7.99387e-09	47.985	45.892	21.017	17.353	No	URA7	Major CTP synthase isozyme (see also URA8); catalyzes the ATP-dependent transfer of the amide nitrogen from glutamine to UTP, forming CTP, the final step in de novo biosynthesis of pyrimidines; involved in phospholipid biosynthesis; capable of forming cytoplasmic filaments termed cytoophidium, especially during conditions of glucose depletion; URA7 has a paralog, URA8, that arose from the whole g…
YCR072C	1.29238	7.46732e-06	6.18721e-05	18.814	16.833	6.654	7.904	No	RSA4	WD-repeat protein involved in ribosome biogenesis; may interact with ribosomes; required for maturation and efficient intra-nuclear transport or pre-60S ribosomal subunits, localizes to the nucleolus Rsa4p
YDR275W	1.29038	2.19927e-12	6.60682e-11	109.861	106.173	49.974	38.676	No	BSC2	hypothetical protein; ORF exhibits genomic organization compatible with a translational readthrough-dependent mode of expression; null mutant displays increased translation rate and increased readthrough of premature stop codons; BSC2 has a paralog, IRC23, that arose from the whole genome duplication Bsc2p
YPL009C	1.2882	1.57108e-14	6.29825e-13	108.275	94.809	41.175	42.2	No	RQC2	Component of RQC, which mediates nascent chain degradation; RQC (ribosome quality control complex) is a ribosome-bound complex required for degradation of polypeptides arising from stalled translation; recruits alanine- and threonine-charged tRNA to the A site and directs the elongation of nascent chains independently of mRNA or 40S subunits; monitors translation stress and signals this to Hsf1p …
YHR066W	1.28231	0.000100655	0.000622638	18.703	18.613	5.625	9.727	No	SSF1	Constituent of 66S pre-ribosomal particles; required for ribosomal large subunit maturation; functionally redundant with Ssf2p; member of the Brix family; SSF1 has a paralog, SSF2, that arose from the whole genome duplication rRNA-binding ribosome biosynthesis protein
YKR013W	1.27986	2.85693e-19	2.06616e-17	476.829	478.469	213.389	181.016	No	PRY2	Sterol binding protein involved in the export of acetylated sterols; secreted glycoprotein and member of the CAP protein superfamily (cysteine-rich secretory proteins (CRISP), antigen 5, and pathogenesis related 1 proteins); sterol export function is redundant with that of PRY1; may be involved in detoxification of hydrophobic compounds; PRY2 has a paralog, PRY1, that arose from the whole genome …
YNR038W	1.27591	1.08979e-05	8.62699e-05	16.403	16.551	7.291	6.337	No	DBP6	Essential protein involved in ribosome biogenesis; putative ATP-dependent RNA helicase of the DEAD-box protein family; human homolog DDX51 complements yeast dbp6 mutant putative ATP-dependent RNA helicase DBP6
YOR294W	1.27537	1.46995e-09	2.77774e-08	42.793	38.452	16.09	17.576	No	RRS1	Essential protein that binds ribosomal protein L11; required for nuclear export of the 60S pre-ribosomal subunit during ribosome biogenesis; localizes to the nucleolus and in foci along nuclear periphery; cooperates with Ebp2p and Mps3p to mediate telomere clustering by binding Sir4p, but is not involved in telomere tethering; mouse homolog shows altered expression in Huntington's disease model m…
YGR169C-A	1.27447	7.9103e-11	1.84616e-09	129.481	134.333	45.808	63.388	No	LSO2	Protein with a potential role in response to iron deprivation; localizes to nucleus and cytoplasm, and nuclear localization is enhanced under iron-replete conditions; null mutant exhibits slow growth during iron deprivation; LSO2 has a paralog, LSO1, that arose from the whole genome duplication Lso2p
YNR053C	1.27363	7.91157e-10	1.59814e-08	37.85	40.424	16.446	16.008	No	NOG2	Putative GTPase; associates with pre-60S ribosomal subunits in the nucleolus and is required for their nuclear export and maturation; recruited by ribosomal proteins L17, L35, and L37 to assembling ribosomes after 27SB pre-rRNA is generated, immediately preceding removal of ITS2 putative GTPase NOG2
YIL140W	1.26948	3.18371e-10	6.90747e-09	41.763	43.439	18.431	17.042	No	AXL2	Integral plasma membrane protein; required for axial budding in haploid cells; localizes to the incipient bud site and bud neck; glycosylated by Pmt4p; potential Cdc28p substrate Axl2p
YIR009W	1.26041	5.19379e-10	1.0751e-08	46.928	56.529	21.654	21.589	No	MSL1	U2B component of U2 snRNP; involved in splicing, binds the U2 snRNA stem-loop IV in vitro but requires association of Lea1p for in vivo binding; does not contain the conserved C-terminal RNA binding domain found in other family members U2 snRNP complex subunit MSL1
YPL267W	1.25991	2.64728e-10	5.82998e-09	43.831	42.249	17.928	18.076	No	ACM1	Pseudosubstrate inhibitor of the APC/C; suppresses APC/C [Cdh1]-mediated proteolysis of mitotic cyclins; associates with Cdh1p, Bmh1p and Bmh2p; cell cycle regulated protein; the anaphase-promoting complex/cyclosome is also known as APC/C Acm1p
YOL010W	1.25944	2.82941e-06	2.55388e-05	35.486	33.156	11.262	17.465	No	RCL1	Endonuclease that cleaves pre-rRNA at site A2 for 18S rRNA biogenesis; subunit of U3-containing 90S preribosome processome complex involved in small ribosomal subunit assembly; stimulates Bms1p GTPase and U3 binding activity; similar to RNA cyclase-like proteins but no cyclase activity detected rRNA-processing endoribonuclease
YJR154W	1.25863	4.21922e-05	0.000283118	15.615	20.857	8.529	6.726	No	YJR154W	hypothetical protein; green fluorescent protein (GFP)-fusion protein localizes to the cytoplasm hypothetical protein
YOR337W	1.25575	3.74986e-09	6.41035e-08	41.717	36.708	16.862	16.042	No	TEA1	Ty1 enhancer activator involved in Ty enhancer-mediated transcription; required for full levels of Ty enhancer-mediated transcription; C6 zinc cluster DNA-binding protein Tea1p
YML133C	1.2544	8.66005e-08	1.12485e-06	37.044	38.025	18.161	13.407	No	YML133C	Putative Y' element ATP-dependent helicase; the authentic, non-tagged protein is detected in highly purified mitochondria in high-throughput studies; YML133C contains an intron Y' element ATP-dependent helicase
YHR215W	1.2522	7.66451e-08	1.00896e-06	27.78	28.969	11.434	12.429	No	PHO12	One of three repressible acid phosphatases; glycoprotein that is transported to the cell surface by the secretory pathway; pregulated by phosphate starvation; PHO12 has a paralog, PHO11, that arose from a segmental duplication acid phosphatase PHO12
YOR310C	1.2521	2.92569e-14	1.10572e-12	120.051	105.346	48.859	46.046	No	NOP58	Protein involved in producing mature rRNAs and snoRNAs; involved in pre-rRNA processing, 18S rRNA synthesis, and snoRNA synthesis; component of the small subunit processome complex, which is required for processing of pre-18S rRNA RNA-processing protein NOP58
YFR037C	1.25153	2.54679e-14	9.68773e-13	175.834	173.858	66.126	80.964	No	RSC8	Component of the RSC chromatin remodeling complex; essential for viability and mitotic growth; homolog of SWI/SNF subunit Swi3p, but unlike Swi3p, does not activate transcription of reporters Rsc8p
YKL166C	1.24726	2.51993e-07	2.94059e-06	25.898	27.097	10.38	11.928	No	TPK3	cAMP-dependent protein kinase catalytic subunit; promotes vegetative growth in response to nutrients via the Ras-cAMP signaling pathway; partially redundant with Tpk1p and Tpk2p; localizes to P-bodies during stationary phase; TPK3 has a paralog, TPK1, that arose from the whole genome duplication cAMP-dependent protein kinase catalytic subunit TPK3
YBL071W-A	1.24627	4.87509e-13	1.61346e-11	222.104	174.993	82.326	85.556	No	KTI11	Zn-ribbon protein that co-purifies with Dph1 and Dph2; in a complex required for synthesis of diphthamide on translation factor eEF2 and with Elongator subunits Iki3p, Elp2p, and Elp3p; involved in modification of wobble nucleosides in tRNAs; forms a stable heterodimer with Ats1p Kti11p
YCL048W	1.23697	0.00157563	0.00675696	7.854	8.857	3.247	3.846	No	SPS22	hypothetical protein; SPS22 has a paralog, SPS2, that arose from the whole genome duplication; redundant with Sps2p for the organization of the beta-glucan layer of the spore wall Sps22p
YNL282W	1.22761	5.41342e-09	9.03059e-08	35.579	37.044	15.759	15.352	No	POP3	Subunit of both RNase MRP and nuclear RNase P; RNase MRP cleaves pre-rRNA, while nuclear RNase P cleaves tRNA precursors to generate mature 5' ends and facilitates turnover of nuclear RNAs; relocalizes to the cytosol in response to hypoxia Pop3p
YAL015C	1.22306	3.31046e-13	1.11452e-11	74.866	74.488	31.678	32.361	No	NTG1	DNA N-glycosylase and apurinic/apyrimidinic (AP) lyase; involved in base excision repair; acts in both nucleus and mitochondrion; creates a double-strand break at mtDNA origins that stimulates replication in response to oxidative stress; required for maintaining mitochondrial genome integrity; NTG1 has a paralog, NTG2, that arose from the whole genome duplication bifunctional N-glycosylase/AP lya…
YHR044C	1.22271	3.22603e-14	1.21142e-12	129.222	133.479	52.07	60.631	No	DOG1	2-deoxyglucose-6-phosphate phosphatase; member of a family of low molecular weight phosphatases; confers 2-deoxyglucose resistance when overexpressed; DOG1 has a paralog, DOG2, that arose from a single-locus duplication; the last half of DOG1 and DOG2 are subject to gene conversions among S. cerevisiae, S. paradoxus, and S. mikatae 2-deoxyglucose-6-phosphatase
YJL037W	1.22245	0.00305464	0.0118898	7.724	8.503	2.77	4.169	No	IRC18	Protein involved in outer spore wall assembly; possible role in assembly of the dityrosine layer; similar to adjacent ORF, LOH1; irc18 loh1 double mutant exhibits reduced dityrosine fluorescence relative to single mutants; SWAT-GFP fusion protein localizes to the ER and vacuole, while mCherry fusion localizes to the vacuole; expression induced in respiratory-deficient cells and carbon-limited che…
YMR041C	1.22076	1.10895e-11	3.04986e-10	96.165	80.684	39.227	36.797	No	ARA2	NAD-dependent arabinose dehydrogenase; involved in biosynthesis of dehydro-D-arabinono-1,4-lactone; similar to plant L-galactose dehydrogenase D-arabinose 1-dehydrogenase (NAD(P)(+)) ARA2
YNL299W	1.22068	0.000352544	0.00186896	10.654	11.482	5.086	4.436	No	TRF5	Non-canonical poly(A) polymerase; involved in nuclear RNA degradation as a component of the TRAMP complex; catalyzes polyadenylation of hypomodified tRNAs, and snoRNA and rRNA precursors; overlapping but non-redundant functions with Pap2p non-canonical poly(A) polymerase TRF5
YOL067C	1.21974	1.72199e-10	3.89476e-09	52.445	58.71	25.024	22.856	Yes	RTG1	Transcription factor (bHLH) involved in interorganelle communication; contributes to communication between mitochondria, peroxisomes, and nucleus; target of Hog1p; activated in stochastic pulses of nuclear localization Rtg1p
YHR199C-A	1.2182	3.35002e-11	8.38651e-10	114.719	142.999	59.839	51.182	No	NBL1	Subunit of the conserved chromosomal passenger complex (CPC); complex regulates mitotic chromosome segregation; not required for the kinase activity of the complex; mediates the interaction of Sli15p and Bir1p; other complex members are Ipl1p, Sli15p, and Bir1p Nbl1p
YLR042C	1.2178	1.64513e-11	4.36071e-10	63.248	62.543	25.661	28.437	No	YLR042C	Cell wall hypothetical protein; localizes to the cytoplasm; deletion improves xylose fermentation in industrially engineered strains; YLR042C is not an essential gene hypothetical protein
YPR186C	1.21737	1.1583e-05	9.13234e-05	17.71	17.305	7.561	7.482	No	PZF1	Transcription factor IIIA (TFIIIA); essential DNA binding protein required for transcription of 5S rRNA by RNA polymerase III; not involved in transcription of other RNAP III genes; nine conserved zinc fingers; may also bind 5S rRNA Pzf1p
YOR205C	1.21425	1.44619e-07	1.7873e-06	28.661	29.332	11.85	13.174	No	GEP3	Protein required for mitochondrial ribosome small subunit biogenesis; null mutant is defective in respiration and in maturation of 15S rRNA; protein is localized to the mitochondrial inner membrane; null mutant interacts synthetically with prohibitin (Phb1p) Gep3p
YFR036W	1.21094	3.37103e-10	7.26012e-09	80.467	64.923	31.96	30.994	No	CDC26	Subunit of the Anaphase-Promoting Complex/Cyclosome (APC/C); which is a ubiquitin-protein ligase required for degradation of anaphase inhibitors, including mitotic cyclins, during the metaphase/anaphase transition; relocalizes to the cytosol in response to hypoxia anaphase promoting complex subunit CDC26
YDR082W	1.20862	5.79573e-09	9.48362e-08	38.129	38.434	16.004	17.209	No	STN1	Telomere end-binding and capping protein; plays a key role with Pol12p in linking telomerase action with completion of lagging strand synthesis, and in a regulatory step required for telomere capping; similar to human Stn1 Stn1p
YDR218C	1.20427	0.0138396	0.041448	5.276	4.642	2.328	1.99	No	SPR28	Sporulation-specific homolog of the CDC3/10/11/12 family of genes; meiotic septin expressed at high levels during meiotic divisions and ascospore formation; the yeast CDC3/10/11/12 family is a family of bud neck microfilament genes septin SPR28
YKR106W	1.19766	1.48018e-06	1.42146e-05	24.999	22.555	10.343	10.405	No	GEX2	Proton:glutathione antiporter; localized to the vacuolar and plasma membranes; expressed at a very low level; potential role in resistance to oxidative stress and modulation of the PKA pathway; GEX2 has a paralog, GEX1, that arose from a segmental duplication glutathione exchanger
YJL108C	1.19727	3.06197e-08	4.31179e-07	49.2	41.75	21.629	18.098	No	PRM10	Pheromone-regulated protein; proposed to be involved in mating; predicted to have 5 transmembrane segments; induced by treatment with 8-methoxypsoralen and UVA irradiation pheromone-regulated protein PRM10
YMR184W	1.19434	8.29241e-14	2.98147e-12	133.014	132.844	53.834	62.577	No	ADD37	hypothetical protein; involved in ER-associated protein degradation; green fluorescent protein (GFP)-fusion protein localizes to the cytoplasm and is induced in response to the DNA-damaging agent MMS; YMR184W is not an essential gene; protein abundance increases in response to DNA replication stress Add37p
YMR011W	1.19433	6.53104e-07	6.88109e-06	216.745	157.343	65.011	98.74	No	HXT2	High-affinity glucose transporter of the major facilitator superfamily; expression is induced by low levels of glucose and repressed by high levels of glucose hexose transporter HXT2
YIR031C	1.19153	1.414e-11	3.81714e-10	71	67.694	29.007	31.839	No	DAL7	Malate synthase; can accept butyryl-CoA as acyl-CoA donor in addition to traditional substrate acetyl-CoA; recycles glyoxylate generated during allantoin degradation; SWAT-GFP and mCherry fusion proteins localize to the cytosol; expression sensitive to nitrogen catabolite repression and induced by allophanate, an intermediate in allantoin degradation malate synthase DAL7
YKR061W	1.19045	2.89625e-13	9.86407e-12	83.898	84.79	38.026	36.097	No	KTR2	Mannosyltransferase involved in N-linked protein glycosylation; member of the KRE2/MNT1 mannosyltransferase family; KTR2 has a paralog, YUR1, that arose from the whole genome duplication mannosyltransferase KTR2
YML053C	1.18927	3.64363e-12	1.06722e-10	68.264	70.809	30.833	30.282	No	YML053C	hypothetical protein; green fluorescent protein (GFP)-fusion protein localizes to the cytoplasm and the nucleus; overexpression causes a cell cycle delay or arrest; YML053C is not an essential gene hypothetical protein
YDL167C	1.18643	3.67306e-05	0.000252248	17.664	18.168	6.899	8.882	No	NRP1	Putative RNA binding hypothetical protein; localizes to stress granules induced by glucose deprivation; predicted to be involved in ribosome biogenesis Nrp1p
YEL049W	1.18487	1.17784e-05	9.27024e-05	19.213	22.083	9.914	8.327	No	PAU2	Member of the seripauperin multigene family; encoded mainly in subtelomeric region; active during alcoholic fermentation; regulated by anaerobiosis; negatively regulated by oxygen; repressed by heme seripauperin PAU2
YMR100W	1.1836	2.03271e-06	1.8871e-05	53.947	52.151	28.786	18.087	No	MUB1	MYND domain-containing protein; component of the Mub1p-Ubr2p-Rad6p ubiquitin ligase complex, required for ubiquitination and degradation of Rpn4p; interacts with Ubr2p (E3) and indirectly with Rad6p (E2); short-lived protein degraded in a Ubr2p/Rad6p dependent manner; proposed to function as both a partner and substrate of the Ubr2p/Rad6p ubiquitin ligase; similar to the A. nidulans samB gene Mub…
YOR174W	1.18076	2.69576e-11	6.98751e-10	82.757	80.92	33.136	39.165	No	MED4	Subunit of the RNA polymerase II mediator complex; associates with core polymerase subunits to form the RNA polymerase II holoenzyme; essential for transcriptional regulation Med4p
YLR438C-A	1.1752	3.86754e-18	2.28849e-16	213.703	220.204	95.684	96.906	No	LSM3	Lsm (Like Sm) protein; part of heteroheptameric complexes (Lsm2p-7p and either Lsm1p or 8p): cytoplasmic Lsm1p complex involved in mRNA decay; nuclear Lsm8p complex part of U6 snRNP and possibly involved in processing tRNA, snoRNA, and rRNA; protein increases in abundance and relocalizes from nucleus to cytoplasmic foci upon DNA replication stress U4/U6-U5 snRNP complex subunit LSM3
YOR304C-A	1.17317	3.50283e-09	6.07088e-08	211.441	261.518	89.177	120.885	No	BIL1	Protein that binds Bud6p and has a role in actin cable assembly; involved in the Bnr1p-dependent pathway of cable assembly; localizes to bud tip and bud neck Bil1p
YDR312W	1.16727	6.3115e-05	0.000407638	14.929	16.333	7.144	6.792	No	SSF2	Protein required for ribosomal large subunit maturation; functionally redundant with Ssf1p; member of the Brix family; SSF2 has a paralog, SSF1, that arose from the whole genome duplication rRNA-binding ribosome biosynthesis protein
YKL028W	1.16615	1.8122e-09	3.31746e-08	64.963	69.51	26.752	33.228	No	TFA1	TFIIE large subunit; involved in recruitment of RNA polymerase II to the promoter, activation of TFIIH, and promoter opening transcription factor TFIIE subunit TFA1
YJL126W	1.1644	3.67316e-07	4.10637e-06	28.188	31.994	13.443	13.429	No	NIT2	Nit protein; one of two proteins in S. cerevisiae with similarity to the Nit domain of NitFhit from fly and worm and to the mouse and human Nit protein which interacts with the Fhit tumor suppressor; nitrilase superfamily member putative hydrolase
YGL127C	1.16243	3.15204e-11	7.99336e-10	167.304	170.242	85.5	65.701	No	SOH1	Subunit of the RNA polymerase II mediator complex; associates with core polymerase subunits to form the RNA polymerase II holoenzyme; involved in telomere maintenance; conserved with other metazoan MED31 subunits Soh1p
YAL036C	1.15951	4.62423e-07	5.05387e-06	37.34	31.694	16.691	14.307	No	RBG1	Member of the DRG family of GTP-binding proteins; associates with translating ribosomes; interacts with Tma46p, Ygr250cp, Gir2p and Yap1p via two-hybrid GTP-binding protein RBG1
YJL159W	1.15648	8.79588e-21	7.69048e-19	1940.21	1873.45	894.069	820.926	No	HSP150	O-mannosylated heat shock protein; secreted and covalently attached to the cell wall via beta-1,3-glucan and disulfide bridges; required for cell wall stability; induced by heat shock, oxidative stress, and nitrogen limitation; HSP150 has a paralog, PIR3, that arose from the whole genome duplication heat shock protein HSP150
YBR030W	1.15181	1.94278e-08	2.88852e-07	62.024	63.987	24.534	32.261	No	RKM3	Ribosomal lysine methyltransferase; specific for monomethylation of Rpl42ap and Rpl42bp (lysine 40); nuclear SET domain containing protein; relocalizes to the cytosol in response to hypoxia protein-lysine N-methyltransferase
YGR158C	1.14995	2.37109e-08	3.43809e-07	37.646	40.66	18.149	17.22	No	MTR3	Exosome non-catalytic core component; involved in 3'-5' RNA processing and degradation in both the nucleus and the cytoplasm; has similarity to E. coli RNase PH and to human hMtr3p (EXOSC6) exosome non-catalytic core subunit MTR3
YGR280C	1.14953	5.39821e-11	1.30135e-09	65.214	71.082	31.445	30.116	No	PXR1	Essential protein involved in rRNA and snoRNA maturation; competes with TLC1 RNA for binding to Est2p, suggesting a role in negative regulation of telomerase; human homolog inhibits telomerase; contains a G-patch RNA interacting domain telomerase inhibitor
YGR251W	1.14323	4.14911e-06	3.64947e-05	26.306	29.605	11.25	14.141	No	NOP19	Ribosome biogenesis factor; nucleolar protein associated with pre-rRNA components of the 90S preribosome, required for cleavage of pre-rRNA at A0, A1 and A2 sites; interacts with RNA helicase Dhr2p and RNA helicase-like protein Utp25p; required for incorporation of Utp25p into preribosomes Nop19p
YML027W	1.14284	7.0269e-09	1.13087e-07	66.178	68.211	34.435	26.669	Yes	YOX1	Homeobox transcriptional repressor; binds to Mcm1p and to early cell cycle boxes (ECBs) in the promoters of cell cycle-regulated genes expressed in M/G1 phase; expression is cell cycle-regulated; phosphorylated by Cdc28p; relocalizes from nucleus to cytoplasm upon DNA replication stress; YOX1 has a paralog, YHP1, that arose from the whole genome duplication Yox1p
YPR173C	1.14244	1.30239e-13	4.62388e-12	145.829	151.802	63.221	71.86	No	VPS4	AAA-ATPase involved in multivesicular body (MVB) protein sorting; ATP-bound Vps4p localizes to endosomes and catalyzes ESCRT-III disassembly and membrane release; ATPase activity is activated by Vta1p; regulates cellular sterol metabolism AAA family ATPase VPS4
YBL051C	1.14122	9.07791e-06	7.33726e-05	39.473	45.011	23.406	15.108	No	PIN4	Protein involved in G2/M phase progression and response to DNA damage; interacts with Rad53p; contains an RNA recognition motif, a nuclear localization signal, and several SQ/TQ cluster domains; hyperphosphorylated in response to DNA damage Pin4p
YOR065W	1.13864	7.26134e-13	2.33719e-11	184.922	173.939	88.98	74.472	No	CYT1	Cytochrome c1; component of the mitochondrial respiratory chain; expression is regulated by the heme-activated, glucose-repressed Hap2p/3p/4p/5p CCAAT-binding complex ubiquinol--cytochrome-c reductase catalytic subunit CYT1
YHL018W	1.13372	3.19597e-05	0.000222881	21.206	22.437	8.492	11.328	No	YHL018W	Putative 4a-hydroxytetrahydrobiopterin dehydratase; green fluorescent protein (GFP)-fusion protein localizes to mitochondria and is induced in response to the DNA-damaging agent MMS 4a-hydroxytetrahydrobiopterin dehydratase
YDL245C	1.13292	8.30371e-07	8.53389e-06	36.812	38.289	19.632	14.763	No	HXT15	Putative transmembrane polyol transporter; supports growth on and uptake of mannitol, sorbitol and xylitol with moderate affinity when overexpressed in a strain deleted for hexose family members; minor hexose transport activity when overexpressed in a similar strain; similarity to hexose transporters; expression is induced by low levels of glucose and repressed by high levels of glucose hexose tr…
YPR014C	1.13249	1.3952e-08	2.1284e-07	52.009	53.777	26.641	21.745	No	YPR014C	hypothetical protein; conserved across S. cerevisiae strains; YPR014C is not an essential gene hypothetical protein
YCR083W	1.13112	6.85121e-17	3.52056e-15	203.633	205.806	94.262	93.104	No	TRX3	Mitochondrial thioredoxin; highly conserved oxidoreductase required to maintain the redox homeostasis of the cell, forms the mitochondrial thioredoxin system with Trr2p, redox state is maintained by both Trr2p and Glr1p Trx3p
YOL162W	1.13099	3.26739e-05	0.000227051	23.636	19.567	10.833	8.971	No	YOL162W	hypothetical protein; member of the Dal5p subfamily of the major facilitator family hypothetical protein
YNR062C	1.12609	5.86183e-05	0.000383328	19.389	18.05	7.622	9.527	No	YNR062C	Putative membrane hypothetical protein hypothetical protein
YKL172W	1.11645	2.16086e-07	2.55447e-06	50.257	55.921	21.188	27.781	No	EBP2	Required for 25S rRNA maturation and 60S ribosomal subunit assembly; localizes to the nucleolus and in foci along nuclear periphery; constituent of 66S pre-ribosomal particles; cooperates with Rrs1p and Mps3p to mediate telomere clustering by binding Sir4p, but is not involved in telomere tethering Ebp2p
YGR079W	1.1143	5.01623e-06	4.33408e-05	25.564	23.164	11.029	11.506	No	YGR079W	hypothetical protein; YGR079W is not an essential gene hypothetical protein
YGR283C	1.10792	8.90423e-07	9.05572e-06	42.385	35.618	16.531	19.71	No	YGR283C	Putative methyltransferase; may interact with ribosomes, based on co-purification experiments; predicted to be involved in ribosome biogenesis; null mutant is resistant to fluconazole; GFP-fusion protein localizes to the nucleolus; YGR283C has a paralog, YMR310C, that arose from the whole genome duplication putative methyltransferase
YDR299W	1.10775	0.000289803	0.00158958	15.531	16.506	6.262	8.571	No	BFR2	Component of the SSU and 90S preribosomes; involved in pre-18S rRNA processing; binds to U3 snoRNA and Mpp10p; multicopy suppressor of sensitivity to Brefeldin A; expression is induced during lag phase and also by cold shock rRNA-processing protein BFR2
YER103W	1.10407	9.64139e-07	9.72105e-06	383.27	495.856	249.393	160.672	No	SSA4	Heat shock protein that is highly induced upon stress; plays a role in SRP-dependent cotranslational protein-membrane targeting and translocation; member of the HSP70 family; cytoplasmic protein that concentrates in nuclei upon starvation; SSA4 has a paralog, SSA3, that arose from the whole genome duplication Hsp70 family chaperone SSA4
YOL124C	1.09852	0.000367466	0.00193258	14.447	14.353	5.931	7.493	No	TRM11	Catalytic subunit of adoMet-dependent tRNA methyltransferase complex; required for the methylation of the guanosine nucleotide at position 10 (m2G10) in tRNAs; contains a THUMP domain and a methyltransferase domain; another complex member is Trm112p tRNA (guanine-N2-)-methyltransferase
YOR298C-A	1.09601	1.79055e-17	9.89534e-16	2932.8	2905.44	1455.79	1282.09	No	MBF1	Transcriptional coactivator; bridges the DNA-binding region of Gcn4p and TATA-binding protein Spt15p; suppressor of frameshift mutations; protein abundance increases in response to DNA replication stress Mbf1p
YKL045W	1.09287	2.20837e-09	3.9805e-08	54.587	55.121	26.666	24.924	No	PRI2	Subunit of DNA primase; DNA primase is required for DNA synthesis and double-strand break repair DNA primase subunit PRI2
YLR010C	1.09143	1.91973e-06	1.78789e-05	104.789	88.35	36.261	54.439	No	TEN1	Protein that regulates telomeric length; protects telomeric ends in a complex with Cdc13p and Stn1p; similar to human Ten1 which is critical for the telomeric function of the CST (Cdc13p-Stn1p-Ten1p) complex Ten1p
YGL028C	1.08968	2.89146e-11	7.42901e-10	190.661	173.004	93.809	77.596	No	SCW11	Cell wall protein with similarity to glucanases; may play a role in conjugation during mating based on its regulation by Ste12p putative glucan endo-1,3-beta-D-glucosidase
YDR060W	1.08951	5.63632e-05	0.000370984	18.526	20.775	8.578	9.961	No	MAK21	Constituent of 66S pre-ribosomal particles; required for large (60S) ribosomal subunit biogenesis; acts as part of a Mak21p-Noc2p-Rrp5p module that associates with nascent pre-rRNA during transcription and has a role in bigenesis of the large ribosomal subunit; involved in nuclear export of pre-ribosomes; required for maintenance of dsRNA virus; homolog of human CAATT-binding protein RNA-binding …
YNL260C	1.08777	4.74194e-07	5.16325e-06	43.488	50.261	19.718	24.468	No	LTO1	Essential protein that forms a complex with Rli1p and Yae1p; ortholog of human ORAOV1, which is overexpressed in solid tumors; inviability of null mutant under standard conditions is complemented by overexpression of ORAOV1; essential for growth under standard (aerobic) conditions but not under anaerobic conditions; may have a role in protection of ribosomal assembly and function from damage due …
YMR254C	1.0871	0.00385159	0.0143494	8.911	8.548	3.701	4.48	No	YMR254C	hypothetical protein; conserved across S. cerevisiae strains hypothetical protein
YOL041C	1.0832	5.37954e-07	5.80357e-06	33.511	33.929	15.122	16.798	No	NOP12	Nucleolar protein involved in pre-25S rRNA processing; also involved in biogenesis of large 60S ribosomal subunit; contains an RNA recognition motif (RRM); binds to Ebp2; similar to Nop13p and Nsr1p Nop12p
YOR359W	1.08301	0.000179948	0.00104473	17.488	16.406	8.983	7.104	No	VTS1	Flap-structured DNA-binding and RNA-binding protein; stimulates deadenylation-dependent mRNA degradation mediated by the CCR4-NOT deadenylase complex; member of the Smaug (Smg) family of post-transcriptional regulators which bind RNA through a conserved sterile alpha motif (SAM) domain that interacts with Smg recognition element (SREs) containing transcripts; stimulates Dna2p endonuclease activit…
YJL194W	1.08009	0.00259868	0.0103629	9.847	9.92	5.331	4.091	No	CDC6	Essential ATP-binding protein required for DNA replication; component of the pre-replicative complex (pre-RC) which requires ORC to associate with chromatin and is in turn required for Mcm2-7p DNA association; homologous to S. pombe Cdc18p; relocalizes from nucleus to cytoplasm upon DNA replication stress; degraded in response to plasma membrane stress AAA family ATPase CDC6
YKR024C	1.07598	0.0109069	0.0340942	6.324	6.586	3.223	2.913	No	DBP7	Putative ATP-dependent RNA helicase of the DEAD-box family; involved in ribosomal biogenesis; required at post-transcriptional step for efficient retrotransposition; essential for growth under anaerobic conditions putative ATP-dependent RNA helicase
YJL034W	1.07541	2.8921e-18	1.76478e-16	1082.81	1124.26	544.176	505.64	No	KAR2	ATPase involved in protein import into the ER; also acts as a chaperone to mediate protein folding in the ER and may play a role in ER export of soluble proteins; regulates the unfolded protein response via interaction with Ire1p Hsp70 family ATPase KAR2
YMR093W	1.06994	2.65299e-05	0.000189527	23.311	23.337	9.987	12.262	No	UTP15	Nucleolar protein; component of the small subunit (SSU) processome containing the U3 snoRNA that is involved in processing of pre-18S rRNA snoRNA-binding rRNA-processing protein UTP15
YGL055W	1.0692	3.79361e-10	7.99387e-09	209.28	180.943	84.311	102.053	No	OLE1	Delta(9) fatty acid desaturase; required for monounsaturated fatty acid synthesis and for normal distribution of mitochondria stearoyl-CoA 9-desaturase
YHR040W	1.06836	3.97157e-08	5.45802e-07	43.766	44.057	20.453	21.433	No	BCD1	Essential protein required for the accumulation of box C/D snoRNA Bcd1p
YFR026C	1.06801	2.20643e-11	5.7702e-10	88.979	88.269	43.418	41.31	No	ULI1	hypothetical protein; involved in and induced by the endoplasmic reticulum unfolded protein response (UPR); SWAT-GFP and mCherry fusion proteins localize to the endoplasmic reticulum Uli1p
YOR319W	1.06765	2.05057e-09	3.71895e-08	64.787	73.934	32.94	33.351	No	HSH49	U2-snRNP associated splicing factor; similar to the mammalian splicing factor SAP49; proposed to function as a U2-snRNP assembly factor along with Hsh155p and binding partner Cus1p; contains two RNA recognition motifs (RRM) U2 snRNP complex subunit HSH49
YJR078W	1.0675	5.53845e-06	4.75025e-05	26.39	25.898	11.936	13.029	No	BNA2	Tryptophan 2,3-dioxygenase or indoleamine 2,3-dioxygenase; required for de novo biosynthesis of NAD from tryptophan via kynurenine; interacts genetically with telomere capping gene CDC13; regulated by Hst1p and Aftp dioxygenase BNA2
YLR154C	1.06601	1.19197e-08	1.84724e-07	52.056	56.938	25.171	26.981	No	RNH203	Ribonuclease H2 subunit; required for RNase H2 activity; role in ribonucleotide excision repair; related to human AGS3 that causes Aicardi-Goutieres syndrome Rnh203p
YLR281C	1.06413	4.08712e-09	6.95999e-08	70.768	67.049	30.612	35.407	No	YLR281C	hypothetical protein; green fluorescent protein (GFP)-fusion protein localizes to mitochondria; YLR281C is not an essential gene hypothetical protein
YDR536W	1.064	7.13892e-06	5.94031e-05	30.469	26.107	14.179	12.973	No	STL1	Glycerol proton symporter of the plasma membrane; subject to glucose-induced inactivation, strongly but transiently induced when cells are subjected to osmotic shock glucose-inactivated glycerol proton symporter STL1
YER126C	1.06395	2.30082e-08	3.36115e-07	48.282	50.743	22.757	24.735	No	NSA2	Protein constituent of 66S pre-ribosomal particles; contributes to processing of the 27S pre-rRNA; recruited by ribosomal proteins L17, L35, and L37 to assembling ribosomes after 27SB pre-rRNA is generated, immediately preceding removal of ITS2 rRNA-processing protein NSA2
YNL091W	1.06279	3.53469e-11	8.81116e-10	118.707	105.419	52.915	54.628	No	NST1	hypothetical protein; mediates sensitivity to salt stress; interacts physically with the splicing factor Msl1p and also displays genetic interaction with MSL1 Nst1p
YHR206W	1.06045	3.34395e-07	3.75986e-06	43.534	40.605	21.911	18.532	Yes	SKN7	Nuclear response regulator and transcription factor; physically interacts with the Tup1-Cyc8 complex and recruits Tup1p to its targets; part of a branched two-component signaling system; required for optimal induction of heat-shock genes in response to oxidative stress; involved in osmoregulation; relocalizes to the cytosol in response to hypoxia; SKN7 has a paralog, HMS2, that arose from the who…
YJR156C	1.05998	5.42782e-05	0.000358469	20.641	18.895	9.828	9.171	No	THI11	Protein involved in synthesis of the thiamine precursor HMP; member of a subtelomeric gene family including THI5, THI11, THI12, and THI13; hydroxymethylpyrimidine is also known as HMP 4-amino-5-hydroxymethyl-2-methylpyrimidine phosphate synthase
YML032C	1.05936	2.43906e-08	3.50196e-07	46.251	46.61	22.524	22.134	No	RAD52	Protein that stimulates strand exchange; stimulates strand exchange by facilitating Rad51p binding to single-stranded DNA; anneals complementary single-stranded DNA; involved in the repair of double-strand breaks in DNA during vegetative growth and meiosis and UV induced sister chromatid recombination recombinase RAD52
YHR120W	1.05754	0.000546812	0.00272383	12.917	14.389	6.262	6.881	No	MSH1	DNA-binding protein of the mitochondria; involved in repair of mitochondrial DNA; has ATPase activity and binds to DNA mismatches; has homology to E. coli MutS; transcription is induced during meiosis mismatch repair ATPase MSH1
YGR212W	1.05313	5.60695e-05	0.000369466	20.103	21.047	9.179	10.683	No	SLI1	N-acetyltransferase; confers resistance to the sphingolipid biosynthesis inhibitor myriocin (ISP-1) by converting it into N-acetyl-myriocin, co-operates with Ypk1p in mediating resistance to myriocin N-acetyltransferase
YOR208W	1.05312	5.87603e-06	5.01045e-05	30.822	31.948	16.924	13.474	No	PTP2	Nuclear phosphotyrosine-specific phosphatase involved in osmosensing; involved in the inactivation of mitogen-activated protein kinase (MAPK) during osmolarity sensing; dephosporylates Hog1p MAPK and regulates its localization; with Msg5p co-regulates the calcium signaling pathway tyrosine protein phosphatase PTP2
YPR018W	1.04658	0.00026782	0.00148008	14.892	16.524	7.818	7.459	No	RLF2	Largest subunit (p90) of the Chromatin Assembly Complex (CAF-1); chromatin assembly by CAF-1 is important for multiple processes including silencing at telomeres, mating type loci, and rDNA; maintenance of kinetochore structure; deactivation of the DNA damage checkpoint after DNA repair; chromatin dynamics during transcription; and repression of divergent noncoding transcription Rlf2p
YER173W	1.0462	3.24015e-05	0.000225425	22.189	22.328	10.049	11.517	No	RAD24	Checkpoint protein; involved in the activation of the DNA damage and meiotic pachytene checkpoints; subunit of a clamp loader that loads Rad17p-Mec3p-Ddc1p onto DNA; homolog of human and S. pombe Rad17 protein Rad24p
YDR257C	1.04496	3.77798e-07	4.21551e-06	39.037	45.465	20.477	20.566	No	RKM4	Ribosomal lysine methyltransferase; specific for monomethylation of Rpl42ap and Rpl42bp (lysine 55); nuclear SET-domain containing protein ribosomal lysine N-methyltransferase
YPL148C	1.04431	1.23758e-08	1.91287e-07	67.532	66.976	29.877	35.407	No	PPT2	Phosphopantetheine:protein transferase (PPTase); activates mitochondrial acyl carrier protein (Acp1p) by phosphopantetheinylation holo-[acyl-carrier-protein] synthase
YML093W	1.04117	0.00089747	0.00413981	14.706	16.914	6.336	8.982	No	UTP14	Subunit of U3-containing Small Subunit (SSU) processome complex; involved in production of 18S rRNA and assembly of small ribosomal subunit Utp14p
YGR127W	1.04073	1.28443e-08	1.97026e-07	204.598	155.027	90.978	84.255	No	YGR127W	hypothetical protein; expression is regulated by Msn2p/Msn4p, indicating a possible role in stress response hypothetical protein
YML113W	1.03731	1.32723e-05	0.000102302	30.683	26.262	14.804	13.007	No	DAT1	DNA binding protein that recognizes oligo(dA).oligo(dT) tracts; Arg side chain in its N-terminal pentad Gly-Arg-Lys-Pro-Gly repeat is required for DNA-binding; relocalizes to the cytosol in response to hypoxia; not essential for viability Dat1p
YOR078W	1.03638	2.67489e-07	3.09674e-06	40.901	44.257	19.754	21.8	No	BUD21	Component of small ribosomal subunit (SSU) processosome; this complex contains U3 snoRNA; required at post-transcriptional step for efficient retrotransposition; absence results in decreased Ty1 Gag:GFP protein levels; originally isolated as bud-site selection mutant that displays a random budding pattern Bud21p
YKL201C	1.0357	1.01804e-06	1.02293e-05	48.282	39.433	21.115	21.834	No	MNN4	Putative positive regulator of mannosylphosphate transferase Mnn6p; involved in mannosylphosphorylation of N-linked oligosaccharides; expression increases in late-logarithmic and stationary growth phases; coding sequence contains length polymorphisms in different strains; MNN4 has a paralog, YJR061W, that arose from the whole genome duplication Mnn4p
YER127W	1.03473	0.00013181	0.000794387	22.235	22.519	9.24	12.573	No	LCP5	Essential protein involved in maturation of 18S rRNA; depletion leads to inhibited pre-rRNA processing and reduced polysome levels; localizes primarily to the nucleolus Lcp5p
YKL095W	1.03351	0.000119425	0.000728743	18.156	19.403	8.59	9.738	No	YJU2	Essential protein required for pre-mRNA splicing; associates transiently with the spliceosomal NTC ('nineteen complex') and acts after Prp2p to promote the first catalytic reaction of splicing mRNA splicing protein YJU2
YMR201C	1.03199	4.07826e-07	4.53512e-06	38.082	40.06	18.382	19.855	No	RAD14	Protein that recognizes and binds damaged DNA during NER; subunit of Nucleotide Excision Repair Factor 1 (NEF1); contains zinc finger motif; homolog of human XPA protein; NER stands for nucleotide excision repair Rad14p
YHR219W	1.03159	8.63986e-07	8.83286e-06	84.092	83.699	34.068	48.103	No	YHR219W	hypothetical protein with similarity to helicases; located in the telomere region on the right arm of chromosome VIII hypothetical protein
snR84	1.03128	1.32693e-06	1.28908e-05	95.303	71.491	36.948	44.823	No	snR84	- -
YJL122W	1.02863	9.88737e-08	1.27297e-06	53.901	63.642	27.573	30.16	No	ALB1	Shuttling pre-60S factor; involved in the biogenesis of ribosomal large subunit; interacts directly with Arx1p; responsible for Tif6p recycling defects in absence of Rei1p Alb1p
YNR072W	1.0284	0.00474007	0.0169831	8.392	9.947	4.363	4.625	No	HXT17	Putative transmembrane polyol transporter; supports growth on and uptake of mannitol and sorbitol with moderate affinity when overexpressed in a strain deleted for hexose family members; minor hexose transport activity when overexpressed in a similar strain; induced by raffinose and galactose at pH 7.7 versus pH 4.7, repressed by high levels of glucose; HXT17 has a paralog, HXT13, that arose from…
YDL209C	1.02819	0.00156427	0.00671809	11.044	12.699	5.551	6.114	No	CWC2	Member of the NineTeen Complex (NTC); this complex contains Prp19p and stabilizes U6 snRNA in catalytic forms of the spliceosome containing U2, U5, and U6 snRNAs; binds directly to U6 snRNA; similar to S. pombe Cwf2 Cwc2p
YDL031W	1.02658	0.00316469	0.0122773	9.514	10.701	4.657	5.247	No	DBP10	Putative ATP-dependent RNA helicase of the DEAD-box protein family; constituent of 66S pre-ribosomal particles; essential protein involved in ribosome biogenesis putative ATP-dependent RNA helicase DBP10
YBR155W	1.02282	0.000130409	0.00078675	20.826	17.941	9.73	9.46	No	CNS1	TPR-containing co-chaperone; binds both Hsp82p (Hsp90) and Ssa1p (Hsp70); stimulates ATPase activity of Ssa1p; ts mutants reduce Hsp82p function, overexpression suppresses phenotypes of HSP82 ts allele and cpr7 deletion; human homolog TTC4 complements yeast cns1 mutant HSP70/90 family co-chaperone CNS1
YDL205C	1.01953	9.64529e-06	7.72943e-05	48.783	54.876	30.195	21.111	No	HEM3	Porphobilinogen deaminase; catalyzes the conversion of 4-porphobilinogen to hydroxymethylbilane, the third step in heme biosynthesis; localizes to the cytoplasm and nucleus; expression is regulated by Hap2p-Hap3p, but not by levels of heme; human homolog HMBS can complement yeast mutant and allow growth of haploid null after sporulation of a heterozygous diploid hydroxymethylbilane synthase
YGR057C	1.0163	3.12559e-07	3.53469e-06	53.233	50.043	23.284	27.926	No	LST7	Subunit of the Lst4p-Lst7p GTPase activating protein complex for Gtr2p; stimulates the GTPase activity of Rag family GTPase Gtr2p, within the context of the Gtr1p-Gtr2p heterodimer, after amino acid stimulation; required for activation of TORC1 in response to amino acid stimulation; recruited to the vacuolar membrane during amino acid starvation and released from the membrane by TORC1; required f…
YKL055C	1.0161	0.00279578	0.0109972	12.574	10.774	6.532	5.036	No	OAR1	Mitochondrial 3-oxoacyl-[acyl-carrier-protein] reductase; may comprise a type II mitochondrial fatty acid synthase along with Mct1p; human homolog CBR4 complements yeast null mutant 3-oxoacyl-[acyl-carrier-protein] reductase (NADPH)
YPL146C	1.01333	0.000112371	0.000688565	29.153	29.105	11.728	17.109	No	NOP53	Nucleolar protein; involved in biogenesis of the 60S subunit of the ribosome; interacts with rRNA processing factors Cbf5p and Nop2p and with the nucleolar proteins Nop17p and Nip7p; null mutant is viable but growth is severely impaired Nop53p
YML060W	1.01152	0.00433333	0.0157473	9.662	10.928	5.809	4.413	No	OGG1	Nuclear and mitochondrial glycosylase/lyase; specifically excises 7,8-dihydro-8-oxoguanine residues located opposite cytosine or thymine residues in DNA, repairs oxidative damage to mitochondrial DNA, contributes to UVA resistance 8-oxoguanine glycosylase OGG1
YNL063W	1.01076	4.59764e-11	1.1269e-09	130.881	120.626	64.716	60.498	No	MTQ1	S-adenosylmethionine-dependent methyltransferase; methylates translational release factor Mrf1p; similar to E.coli PrmC; is not an essential gene S-adenosylmethionine-dependent methyltransferase
YOR196C	1.00957	3.87516e-08	5.35393e-07	54.318	54.395	25.894	28.259	No	LIP5	Protein involved in biosynthesis of the coenzyme lipoic acid; has similarity to E. coli lipoic acid synthase putative lipoate synthase
YLR196W	1.00689	2.76048e-05	0.000196011	24.183	27.924	13.578	12.451	No	PWP1	Protein with WD-40 repeats involved in rRNA processing; associates with trans-acting ribosome biogenesis factors; similar to beta-transducin superfamily rRNA-processing protein PWP1
YAR008W	1.0063	2.05847e-05	0.000150543	25.518	24.654	13.063	12.006	No	SEN34	Subunit of the tRNA splicing endonuclease; tRNA splicing endonuclease (Sen complex) is composed of Sen2p, Sen15p, Sen34p, and Sen54p; Sen complex also cleaves the CBP1 mRNA at the mitochondrial surface; Sen34p contains the active site for tRNA 3' splice site cleavage and has similarity to Sen2p and to Archaeal tRNA splicing endonuclease tRNA splicing endonuclease subunit SEN34
YLR388W	-1.00319	2.41584e-08	3.47715e-07	835.406	740.768	1833.48	1334.64	No	RPS29A	Protein component of the small (40S) ribosomal subunit; homologous to mammalian ribosomal protein S29 and bacterial S14; RPS29A has a paralog, RPS29B, that arose from the whole genome duplication ribosomal 40S subunit protein S29A
YDL130W	-1.00538	9.94179e-10	1.92208e-08	1958.71	1679.42	4090.34	3232.89	No	RPP1B	Ribosomal protein P1 beta; component of the ribosomal stalk, which is involved in interaction of translational elongation factors with ribosome; free (non-ribosomal) P1 stimulates the phosphorylation of the eIF2 alpha subunit (Sui2p) by Gcn2p; accumulation is regulated by phosphorylation and interaction with the P2 stalk component ribosomal protein P1B
YJR001W	-1.00547	3.52307e-09	6.08795e-08	58.751	53.059	121.737	103.331	No	AVT1	Vacuolar transporter; imports large neutral amino acids into the vacuole; member of a family of seven S. cerevisiae genes (AVT1-7) related to vesicular GABA-glycine transporters Avt1p
YBR221C	-1.00596	8.75362e-10	1.73826e-08	290.934	261.663	622.495	490.243	No	PDB1	E1 beta subunit of the pyruvate dehydrogenase (PDH) complex; PDH is an evolutionarily conserved multi-protein complex found in mitochondria pyruvate dehydrogenase (acetyl-transferring) subunit E1 beta
YDR032C	-1.00709	7.14174e-14	2.61477e-12	317.834	280.766	605.315	600.634	No	PST2	Protein with similarity to a family of flavodoxin-like proteins; induced by oxidative stress in a Yap1p dependent manner; the authentic, non-tagged protein is detected in highly purified mitochondria in high-throughput studies; protein abundance increases in response to DNA replication stress; PST2 has a paralog, RFS1, that arose from the whole genome duplication flavodoxin-like fold family prote…
YAR009C	-1.0085	2.22938e-05	0.00016143	24.841	35.564	53.92	67.702	No	YAR009C	Retrotransposon TYA Gag and TYB Pol genes; Gag processing produces capsid proteins, Pol is cleaved to produce protease, reverse transcriptase and integrase activities; in YARCTy1-1 TYB is mutant and probably non-functional; protein product forms cytoplasmic foci upon DNA replication stress truncated gag-pol fusion protein
YKL065W-A	-1.01284	5.46558e-07	5.86595e-06	29.496	26.816	51.04	62.744	No	YKL065W-A	hypothetical protein; SWAT-GFP fusion protein localizes to the endoplasmic reticulum (ER) while mCherry fusion localizes to both the ER and vacuole hypothetical protein
YMR266W	-1.01345	9.40021e-10	1.83979e-08	41.977	38.779	83.748	79.675	No	RSN1	Membrane hypothetical protein; overexpression suppresses NaCl sensitivity of sro7 mutant cells by restoring sodium pump (Ena1p) localization to the plasma membrane Rsn1p
YGL186C	-1.01602	1.43524e-11	3.85671e-10	73.438	66.395	140.107	143.486	No	TPN1	Plasma membrane pyridoxine (vitamin B6) transporter; member of the purine-cytosine permease subfamily within the major facilitator superfamily; proton symporter with similarity to Fcy21p, Fcy2p, and Fcy22p Tpn1p
YNR028W	-1.0167	5.6538e-09	9.32957e-08	31.499	31.003	65.55	61.265	No	CPR8	Peptidyl-prolyl cis-trans isomerase (cyclophilin); catalyzes the cis-trans isomerization of peptide bonds N-terminal to proline residues; potential role in the secretory pathway; CPR8 has a paralog, CPR4, that arose from the whole genome duplication peptidylprolyl isomerase family protein CPR8
YLR043C	-1.01701	1.1934e-15	5.46166e-14	675.455	624.63	1364.53	1272.79	No	TRX1	Cytoplasmic thioredoxin isoenzyme; part of thioredoxin system which protects cells against oxidative and reductive stress; forms LMA1 complex with Pbi2p; acts as a cofactor for Tsa1p; required for ER-Golgi transport and vacuole inheritance; with Trx2p, facilitates mitochondrial import of small Tims Tim9p, Tim10p, Tim13p by maintaining them in reduced form; abundance increases iunder DNA replicati…
YOR230W	-1.01766	1.88422e-13	6.57011e-12	183.095	168.226	341.817	371.037	Yes	WTM1	Transcriptional modulator; involved in regulation of meiosis, silencing, and expression of RNR genes; required for nuclear localization of the ribonucleotide reductase small subunit Rnr2p and Rnr4p; contains WD repeats transcriptional modulator
YML101C	-1.02048	5.74687e-09	9.43002e-08	58.25	56.62	129.678	104.065	No	CUE4	hypothetical protein; has a CUE domain that binds ubiquitin, which may facilitate intramolecular monoubiquitination; CUE4 has a paralog, CUE1, that arose from the whole genome duplication Cue4p
YGL009C	-1.02204	3.50817e-12	1.03271e-10	231.034	243.74	525.978	440.629	No	LEU1	Isopropylmalate isomerase; catalyzes the second step in the leucine biosynthesis pathway 3-isopropylmalate dehydratase LEU1
YFR015C	-1.02368	5.68421e-09	9.3534e-08	312.4	286.408	700.974	519.759	No	GSY1	Glycogen synthase; expression induced by glucose limitation, nitrogen starvation, environmental stress, and entry into stationary phase; GSY1 has a paralog, GSY2, that arose from the whole genome duplication; relocalizes from nucleus to cytoplasmic foci upon DNA replication stress glycogen (starch) synthase GSY1
YBL003C	-1.02645	7.20173e-17	3.6685e-15	355.248	374.358	758.84	730.613	No	HTA2	Histone H2A; core histone protein required for chromatin assembly and chromosome function; one of two nearly identical (see also HTA1) subtypes; DNA damage-dependent phosphorylation by Mec1p facilitates DNA repair; acetylated by Nat4p histone H2A
YHR025W	-1.02817	2.30303e-12	6.88325e-11	172.524	158.424	362.551	314.196	No	THR1	Homoserine kinase; conserved protein required for threonine biosynthesis; long-lived protein that is preferentially retained in mother cells and forms cytoplasmic filaments; expression is regulated by the GCN4-mediated general amino acid control pathway homoserine kinase
YPR043W	-1.02943	1.06992e-09	2.05494e-08	6058.19	5840.06	13993.4	10358.6	No	RPL43A	Ribosomal 60S subunit protein L43A; null mutation confers a dominant lethal phenotype; homologous to mammalian ribosomal protein L37A, no bacterial homolog; RPL43A has a paralog, RPL43B, that arose from the whole genome duplication ribosomal 60S subunit protein L43A
YOR270C	-1.02965	5.58949e-11	1.34193e-09	107.051	103.593	235.864	195.357	No	VPH1	Subunit a of vacuolar-ATPase V0 domain; one of two isoforms (Vph1p and Stv1p); Vph1p is located in V-ATPase complexes of the vacuole while Stv1p is located in V-ATPase complexes of the Golgi and endosomes; relative distribution to the vacuolar membrane decreases upon DNA replication stress; human homolog ATP6V0A4 implicated in renal tubular acidosis, can complement yeast null mutant H(+)-transpor…
YER119C	-1.02997	4.70548e-08	6.33671e-07	53.475	50.906	121.112	92.504	No	AVT6	Vacuolar aspartate and glutamate exporter; member of a family of seven genes (AVT1-7) related to vesicular GABA-glycine transporters; involved in compartmentalizing acidic amino acids in response to nitrogen starvation; AVT6 has a paralog, AVT5, that arose from the whole genome duplication aspartate/glutamate transporter
YGR027W-B	-1.02999	5.83501e-11	1.38949e-09	120.904	140.837	249.907	285.537	No	YGR027W-B	Retrotransposon TYA Gag and TYB Pol genes; transcribed/translated as one unit; polyprotein is processed to make a nucleocapsid-like protein (Gag), reverse transcriptase (RT), protease (PR), and integrase (IN); similar to retroviral genes gag-pol fusion protein
YLR167W	-1.03216	3.46776e-17	1.8301e-15	4408.89	4402.44	9469.77	8593.27	No	RPS31	Fusion protein cleaved to yield ribosomal protein S31 and ubiquitin; ubiquitin may facilitate assembly of the ribosomal protein into ribosomes; interacts genetically with translation factor eIF2B; homologous to mammalian ribosomal protein S27A, no bacterial homolog ubiquitin-ribosomal 40S subunit protein S31 fusion protein
YMR173W	-1.0351	2.85335e-16	1.39291e-14	444.524	441.616	954.104	866.261	No	DDR48	DNA damage-responsive protein; expression is increased in response to heat-shock stress or treatments that produce DNA lesions; contains multiple repeats of the amino acid sequence NNNDSYGS; protein abundance increases in response to DNA replication stress DNA damage-responsive protein 48
YGL234W	-1.04066	4.34168e-14	1.61997e-12	88.339	88.114	179.762	183.929	No	ADE5,7	Enzyme of the 'de novo' purine nucleotide biosynthetic pathway; contains aminoimidazole ribotide synthetase and glycinamide ribotide synthetase activities bifunctional aminoimidazole ribotide synthase/glycinamide ribotide synthase
YPL234C	-1.04213	1.2086e-14	4.98589e-13	262.217	236.182	531.505	497.358	No	VMA11	Vacuolar ATPase V0 domain subunit c'; involved in proton transport activity; hydrophobic integral membrane protein (proteolipid) containing four transmembrane segments; N and C termini are in the vacuolar lumen H(+)-transporting V0 sector ATPase subunit c'
YDL146W	-1.04436	4.83347e-09	8.15979e-08	33.798	36.581	77.706	67.724	No	LDB17	Protein involved in the regulation of endocytosis; transiently recruited to actin cortical patches in a SLA1-dependent manner after late coat component assembly; GFP-fusion protein localizes to the periphery, cytoplasm, bud, and bud neck Ldb17p
YBR196C	-1.04439	7.95407e-10	1.59901e-08	527.207	521.991	1244.95	924.769	No	PGI1	Glycolytic enzyme phosphoglucose isomerase; catalyzes the interconversion of glucose-6-phosphate and fructose-6-phosphate; required for cell cycle progression and completion of the gluconeogenic events of sporulation glucose-6-phosphate isomerase
YDR158W	-1.04593	1.10924e-17	6.30865e-16	324.398	317.584	654.799	673.55	No	HOM2	Aspartic beta semi-aldehyde dehydrogenase; catalyzes the second step in the common pathway for methionine and threonine biosynthesis; expression regulated by Gcn4p and the general control of amino acid synthesis aspartate-semialdehyde dehydrogenase
YBL098W	-1.04609	3.87651e-06	3.43549e-05	14.613	15.606	29.019	33.428	No	BNA4	Kynurenine 3-monooxygenase; required for the de novo biosynthesis of NAD from tryptophan via kynurenine; expression regulated by Hst1p; putative therapeutic target for Huntington disease kynurenine 3-monooxygenase
YFL039C	-1.04636	2.81299e-18	1.73458e-16	1136.97	1081.4	2347.14	2245.24	No	ACT1	Actin; structural protein involved in cell polarization, endocytosis, and other cytoskeletal functions actin
YKL008C	-1.05043	1.22958e-07	1.54901e-06	66.252	56.284	145.817	108.69	No	LAC1	Ceramide synthase component; involved in synthesis of ceramide from C26(acyl)-coenzyme A and dihydrosphingosine or phytosphingosine, functionally equivalent to Lag1p; LAC1 has a paralog, LAG1, that arose from the whole genome duplication sphingosine N-acyltransferase LAC1
YAR015W	-1.05309	1.64387e-07	2.00923e-06	164.235	167.254	278.117	410.891	No	ADE1	N-succinyl-5-aminoimidazole-4-carboxamide ribotide synthetase; required for 'de novo' purine nucleotide biosynthesis; red pigment accumulates in mutant cells deprived of adenine; protein abundance increases in response to DNA replication stress phosphoribosylaminoimidazolesuccinocarboxamide synthase
YMR319C	-1.05334	1.99866e-14	7.80545e-13	91.325	90.939	193.843	185.341	No	FET4	Low-affinity Fe(II) transporter of the plasma membrane Fet4p
YJL190C	-1.05702	2.66833e-10	5.85434e-09	2258.6	2095.91	5185.4	3899.11	No	RPS22A	Protein component of the small (40S) ribosomal subunit; homologous to mammalian ribosomal protein S15A and bacterial S8; RPS22A has a paralog, RPS22B, that arose from the whole genome duplication ribosomal 40S subunit protein S22A
YKL084W	-1.06137	7.97049e-10	1.59901e-08	82.331	71.245	146.025	175.235	No	HOT13	Zinc-binding mitochondrial intermembrane space (IMS) protein; involved in a disulfide relay system for IMS import of cysteine-containing proteins; binds Mia40p and stimulates its Erv1p-dependent oxidation, probably by sequestering zinc Hot13p
YMR272C	-1.06467	3.88458e-08	5.35433e-07	167.74	169.234	418.347	288.55	No	SCS7	Sphingolipid alpha-hydroxylase; functions in the alpha-hydroxylation of sphingolipid-associated very long chain fatty acids, has both cytochrome b5-like and hydroxylase/desaturase domains, not essential for growth fatty acid alpha-hydroxylase
YEL039C	-1.06669	1.04675e-07	1.33013e-06	37.322	42.631	95.132	72.727	No	CYC7	Cytochrome c isoform 2, expressed under hypoxic conditions; also known as iso-2-cytochrome c; electron carrier of the mitochondrial intermembrane space that transfers electrons from ubiquinone-cytochrome c oxidoreductase to cytochrome c oxidase during cellular respiration; protein abundance increases in response to DNA replication stress; CYC7 has a paralog, CYC1, that arose from the whole genome…
YMR206W	-1.06719	3.40932e-06	3.02603e-05	30.284	28.088	72.731	50.093	No	YMR206W	hypothetical protein; not an essential gene; YMR206W has a paralog, YNR014W, that arose from the whole genome duplication hypothetical protein
YOR167C	-1.06875	2.55132e-16	1.25594e-14	3970.43	3580.1	8283.82	7593.23	No	RPS28A	Protein component of the small (40S) ribosomal subunit; has an extraribosomal function in regulation of RPS28B, in which Rps28Ap binds to a decapping complex via Edc3p, which then binds to RPS28B mRNA leading to its decapping and degradation; homologous to mammalian ribosomal protein S28, no bacterial homolog; RPS28A has a paralog, RPS28B, that arose from the whole genome duplication ribosomal 40…
YPR069C	-1.06937	1.90748e-11	5.01078e-10	129.843	124.886	296.107	239.858	No	SPE3	Spermidine synthase; involved in biosynthesis of spermidine and also in biosynthesis of pantothenic acid; spermidine is required for growth of wild-type cells spermidine synthase
YOR133W	-1.07331	4.30415e-08	5.82303e-07	433.777	403.091	1054.09	711.936	No	EFT1	Elongation factor 2 (EF-2), also encoded by EFT2; catalyzes ribosomal translocation during protein synthesis; contains diphthamide, the unique posttranslationally modified histidine residue specifically ADP-ribosylated by diphtheria toxin; EFT1 has a paralog, EFT2, that arose from the whole genome duplication elongation factor 2
YLR420W	-1.07389	2.82639e-13	9.68245e-12	70.443	65.65	142.178	145.086	No	URA4	Dihydroorotase; catalyzes the third enzymatic step in the de novo biosynthesis of pyrimidines, converting carbamoyl-L-aspartate into dihydroorotate dihydroorotase
YBR243C	-1.07841	1.37878e-09	2.61388e-08	39.696	38.307	89.789	75.361	No	ALG7	UDP-N-acetyl-glucosamine-1-P transferase; transfers Glc-Nac-P from UDP-GlcNac to Dol-P in the ER in the first step of the dolichol pathway of protein asparagine-linked glycosylation; inhibited by tunicamycin; human homolog DPAGT1 can complement yeast ALG7 mutant UDP-N-acetylglucosamine--dolichyl-phosphate N-acetylglucosaminephosphotransferase
YJR105W	-1.07965	2.6033e-08	3.69253e-07	304.314	294.338	755.078	513.789	No	ADO1	Adenosine kinase; required for the utilization of S-adenosylmethionine (AdoMet); may be involved in recycling adenosine produced through the methyl cycle adenosine kinase
YMR087W	-1.0839	7.03983e-11	1.6562e-09	35.059	36.091	77.143	73.994	No	YMR087W	Putative ADP-ribose-1''-monophosphatase; converts ADP-ribose-1''-monophosphate to ADP-ribose; may have a role in tRNA splicing; contains an A1pp domain putative ADP-ribose 1''-phosphate phosphatase
YER178W	-1.0901	1.4227e-14	5.807e-13	285.111	262.971	626.221	543.471	No	PDA1	E1 alpha subunit of the pyruvate dehydrogenase (PDH) complex; catalyzes the direct oxidative decarboxylation of pyruvate to acetyl-CoA; phosphorylated; regulated by glucose; PDH complex is concentrated in spots within the mitochondrial matrix, often near the ERMES complex and near peroxisomes pyruvate dehydrogenase (acetyl-transferring) subunit E1 alpha
YER018C	-1.09123	4.95513e-10	1.03299e-08	43.488	36.745	84.275	87.034	No	SPC25	Component of the kinetochore-associated Ndc80 complex; involved in chromosome segregation, spindle checkpoint activity, and kinetochore clustering; evolutionarily conserved; other members include Ndc80p, Nuf2p, Spc24p, and Spc25p kinetochore-associated Ndc80 complex subunit SPC25
YMR056C	-1.09165	2.47219e-07	2.89064e-06	36.014	31.34	82.51	61.521	No	AAC1	Mitochondrial inner membrane ADP/ATP translocator; exchanges cytosolic ADP for mitochondrially synthesized ATP; phosphorylated; Aac1p is a minor isoform while Pet9p is the major ADP/ATP translocator; relocalizes from mitochondrion to cytoplasm upon DNA replication stress ADP/ATP carrier protein AAC1
YNL239W	-1.09184	8.16871e-16	3.82818e-14	118.178	115.357	241.93	256.945	Yes	LAP3	Cysteine aminopeptidase with homocysteine-thiolactonase activity; protects cells against homocysteine toxicity; has bleomycin hydrolase activity in vitro; transcription is regulated by galactose via Gal4p; orthologous to human BLMH bleomycin hydrolase
YBR187W	-1.0959	4.16902e-08	5.66729e-07	131.586	113.658	309.024	216.601	No	GDT1	Calcium transporter localized to the cis- and medial-Golgi apparatus; required for protein glycosylation; GFP-fusion protein localizes to the vacuole; TMEM165, a human gene which causes Congenital Disorders of Glycosylation is orthologous and functionally complements the null allele; expression pattern and physical interactions suggest a possible role in ribosome biogenesis; expression reduced in…
YKL107W	-1.09669	8.36617e-05	0.000527546	7.622	9.002	18.713	17.042	No	YKL107W	Putative short-chain dehydrogenase/reductase; proposed to be a palmitoylated membrane protein putative short-chain dehydrogenase/reductase
YBR085W	-1.09899	0.000497161	0.0025085	10.979	9.783	27.757	16.898	No	AAC3	Mitochondrial inner membrane ADP/ATP translocator; exchanges cytosolic ADP for mitochondrially synthesized ATP; expressed under anaerobic conditions; similar to Aac1p; has roles in maintenance of viability and in respiration; AAC3 has a paralog, PET9, that arose from the whole genome duplication ADP/ATP carrier protein AAC3
YGL196W	-1.10481	4.28602e-11	1.05494e-09	55.561	47.391	114.899	107.1	No	DSD1	D-serine dehydratase (aka D-serine ammonia-lyase); converts D-serine to pyruvate and ammonia by a reaction dependent on pyridoxal 5'-phosphate and zinc; may play a role in D-serine detoxification; L-serine is not a substrate D-serine ammonia-lyase DSD1
YBR285W	-1.10777	7.6773e-05	0.000487783	16.681	15.679	26.899	42.978	No	YBR285W	hypothetical protein; YBR285W is not an essential gene hypothetical protein
YBR096W	-1.12114	8.7639e-13	2.76016e-11	82.924	70.691	171.172	163.796	No	YBR096W	hypothetical protein; green fluorescent protein (GFP)-fusion protein localizes to the ER hypothetical protein
YGR018C	-1.12497	1.1801e-12	3.60054e-11	74.56	80.82	183.181	156.515	No	YGR018C	hypothetical protein; mRNA identified as translated by ribosome profiling data; partially overlaps the uncharacterized ORF YGR017W hypothetical protein
YIL043C	-1.12744	1.47844e-14	5.9729e-13	343.583	311.652	776.327	658.964	No	CBR1	Cytochrome b reductase; not essential for viability; also detected in mitochondria; mutation in conserved NADH binding domain of the human ortholog results in type I methemoglobinemia Cbr1p
YIL113W	-1.13394	3.78564e-10	7.99387e-09	35.532	32.048	79.422	69.203	No	SDP1	Stress-inducible dual-specificity MAP kinase phosphatase; negatively regulates Slt2p MAP kinase by direct dephosphorylation, diffuse localization under normal conditions shifts to punctate localization after heat shock; SDP1 has a paralog, MSG5, that arose from the whole genome duplication mitogen-activated protein kinase tyrosine protein phosphatase SDP1
YLR112W	-1.13725	6.27766e-05	0.000407248	11.238	9.438	26.396	19.166	No	YLR112W	hypothetical protein; conserved across S. cerevisiae strains hypothetical protein
YGL229C	-1.14113	1.73054e-05	0.000129305	12.74	11.809	31.556	22.767	No	SAP4	Protein required for function of the Sit4p protein phosphatase; member of a family of similar proteins that form complexes with Sit4p, including Sap155p, Sap185p, and Sap190p; SAP4 has a paralog, SAP155, that arose from the whole genome duplication Sap4p
YJL170C	-1.14257	1.67054e-09	3.07737e-08	22.532	23.309	48.749	52.616	No	ASG7	Protein that regulates signaling from G protein beta subunit Ste4p; contributes to relocalization of Ste4p within the cell; specific to a-cells and induced by alpha-factor Asg7p
YHL028W	-1.14425	1.71883e-08	2.57516e-07	35.152	42.068	96.517	74.628	No	WSC4	Endoplasmic reticulum (ER) membrane protein; involved in the translocation of soluble secretory proteins and insertion of membrane proteins into the ER membrane; may also have a role in the stress response but has only partial functional overlap with WSC1-3 Wsc4p
YOR152C	-1.14609	6.39146e-07	6.78282e-06	15.253	12.827	32.242	30.071	No	ATG40	Autophagy receptor with a role in endoplasmic reticulum degradation; involved specifically in autophagy of cortical and cytoplasmic ER in response to nitrogen starvation or rapamycin treatment; localizes to the cortical and cytoplasmic ER; similar to human FAM134B, which is also involved in ER autophagy and is associated with sensory neuropathy Atg40p
YOL114C	-1.14911	0.00088983	0.00412391	6.379	7.939	12.291	19.41	No	PTH4	Protein similar to the human peptidyl-tRNA hydrolase gene ICT1; associates with mitochondrial large subunit; may function in translation termination; YOL114C is not an essential gene Pth4p
YJL059W	-1.14976	4.79248e-09	8.11398e-08	25.805	22.392	56.42	50.771	No	YHC3	Protein required for the ATP-dependent transport of arginine; vacuolar membrane protein; involved in the ATP-dependent transport of arginine into the vacuole and possibly in balancing ion homeostasis; human homolog CLN3 involved in Batten disease (juvenile onset neuronal ceroid lipofuscinosis) can complement yeast null mutant amino acid transporter YHC3
YDR093W	-1.15059	2.46953e-08	3.52842e-07	22.894	21.384	54.079	44.39	No	DNF2	Aminophospholipid translocase (flippase); type 4 P-type ATPase; involved in phospholipid translocation, contributing to endocytosis, protein transport, and cellular polarization; localizes primarily to the plasma membrane; localizes to the shmoo tip where it has a redundant role in the cellular response to mating pheromone; DNF2 has a paralog, DNF1, that arose from the whole genome duplication am…
YJR103W	-1.15098	1.42746e-14	5.807e-13	112.652	112.804	271.304	230.575	No	URA8	Minor CTP synthase isozyme (see also URA7); catalyzes the ATP-dependent transfer of the amide nitrogen from glutamine to UTP, forming CTP, the final step in de novo biosynthesis of pyrimidines; involved in phospholipid biosynthesis; capable of forming cytoplasmic filaments termed cytoophidium, especially during conditions of glucose depletion; URA8 has a paralog, URA7, that arose from the whole g…
YJR115W	-1.15435	1.0172e-11	2.81074e-10	50.183	43.394	109.384	99.463	No	YJR115W	hypothetical protein; YJR115W has a paralog, ECM13, that arose from the whole genome duplication hypothetical protein
YGR045C	-1.15656	0.00657961	0.0223959	2.986	3.207	7.782	5.992	No	YGR045C	hypothetical protein; conserved across S. cerevisiae strains hypothetical protein
YCL009C	-1.15788	5.1785e-21	4.73995e-19	343.268	345.635	795.015	745.743	No	ILV6	Regulatory subunit of acetolactate synthase; acetolactate synthase catalyzes the first step of branched-chain amino acid biosynthesis; enhances activity of the Ilv2p catalytic subunit, localizes to mitochondria acetolactate synthase regulatory subunit
YGL030W	-1.15862	2.39387e-18	1.49184e-16	2399.07	2125	5256.17	4868.44	No	RPL30	Ribosomal 60S subunit protein L30; involved in pre-rRNA processing in the nucleolus; autoregulates splicing of its transcript; homologous to mammalian ribosomal protein L30, no bacterial homolog ribosomal 60S subunit protein L30
YLR231C	-1.1598	4.18154e-12	1.20667e-10	50.776	43.249	105.598	104.888	No	BNA5	Kynureninase; required for the de novo biosynthesis of NAD from tryptophan via kynurenine; expression regulated by Hst1p kynureninase
YNL284C-A	-1.16175	3.35358e-06	2.9856e-05	17.488	13.181	37.952	31.005	No	YNL284C-A	Retrotransposon TYA Gag gene co-transcribed with TYB Pol; translated as TYA or TYA-TYB polyprotein; Gag is a nucleocapsid protein that is the structural constituent of virus-like particles (VLPs); similar to retroviral Gag gag protein
YIL051C	-1.16425	2.357e-18	1.48466e-16	1242.48	1085.07	2574	2654.39	No	MMF1	Mitochondrial protein required for transamination of isoleucine; but not of valine or leucine; may regulate specificity of branched-chain transaminases Bat1p and Bat2p; induction of expression in response to stress is mediated by a Hog1p-regulated antisense RNA and gene looping; interacts genetically with mitochondrial ribosomal protein genes; MMF1 has a paralog, HMF1, that arose from the whole g…
YGL202W	-1.16535	1.89267e-15	8.52868e-14	185.682	175.511	439.326	372.816	No	ARO8	Aromatic aminotransferase I; expression is regulated by general control of amino acid biosynthesis bifunctional 2-aminoadipate transaminase/aromatic-amino-acid:2-oxoglutarate transaminase
YJL038C	-1.16734	4.08265e-05	0.000275616	7.863	7.667	19.105	15.953	No	LOH1	Protein involved in outer spore wall assembly; likely involved directly in dityrosine layer assembly; induced during sporulation; repressed during vegetative growth by Sum1p and Hst1p; sequence similar to adjacent ORF, IRC18/YJL037W, and the irc18 loh1 double mutant exhibits reduced dityrosine fluorescence relative to the single mutants; SWAT-GFP and mCherry fusion proteins localize to the cytoso…
YBR011C	-1.17032	8.02669e-21	7.1243e-19	585.206	580.555	1377.37	1252.63	No	IPP1	Cytoplasmic inorganic pyrophosphatase (PPase); homodimer that catalyzes the rapid exchange of oxygens from Pi with water, highly expressed and essential for viability, active-site residues show identity to those from E. coli PPase inorganic diphosphatase IPP1
YPR127W	-1.17268	7.52365e-15	3.17076e-13	81.459	78.93	193.438	169.01	No	YPR127W	Putative pyridoxine 4-dehydrogenase; differentially expressed during alcoholic fermentation; expression activated by transcription factor YRM1/YOR172W; green fluorescent protein (GFP)-fusion protein localizes to both the cytoplasm and the nucleus pyridoxine 4-dehydrogenase
YDL131W	-1.17629	3.96328e-17	2.07294e-15	128.257	123.987	301.72	269.851	No	LYS21	Homocitrate synthase isozyme; catalyzes the condensation of acetyl-CoA and alpha-ketoglutarate to form homocitrate, which is the first step in the lysine biosynthesis pathway; LYS21 has a paralog, LYS20, that arose from the whole genome duplication homocitrate synthase LYS21
YMR045C	-1.17659	8.85165e-09	1.40523e-07	17.284	19.558	42.56	40.777	No	YMR045C	Retrotransposon TYA Gag and TYB Pol genes; transcribed/translated as one unit; polyprotein is processed to make a nucleocapsid-like protein (Gag), reverse transcriptase (RT), protease (PR), and integrase (IN); similar to retroviral genes gag-pol fusion protein
YJL196C	-1.1772	5.31284e-15	2.28843e-13	151.401	130.727	336.609	303.146	No	ELO1	Elongase I, medium-chain acyl elongase; catalyzes carboxy-terminal elongation of unsaturated C12-C16 fatty acyl-CoAs to C16-C18 fatty acids; ELO1 has a paralog, ELO2, that arose from the whole genome duplication fatty acid elongase ELO1
YHR183W	-1.18425	3.15546e-15	1.37945e-13	284.211	269.829	693.18	568.995	No	GND1	6-phosphogluconate dehydrogenase (decarboxylating); catalyzes an NADPH regenerating reaction in the pentose phosphate pathway; required for growth on D-glucono-delta-lactone and adaptation to oxidative stress; GND1 has a paralog, GND2, that arose from the whole genome duplication phosphogluconate dehydrogenase (decarboxylating) GND1
YOR084W	-1.19518	5.57007e-09	9.24161e-08	35.959	31.549	87.902	67.046	No	LPX1	Peroxisomal matrix-localized lipase; required for normal peroxisome morphology; contains a peroxisomal targeting signal type 1 (PTS1) and a lipase motif; peroxisomal import requires the PTS1 receptor, Pex5p and self-interaction; transcriptionally activated by Yrm1p along with genes involved in multidrug resistance; oleic acid inducible triglyceride lipase
YIL121W	-1.1991	9.5094e-12	2.6401e-10	221.613	213.545	576.884	425.154	No	QDR2	Plasma membrane transporter of the major facilitator superfamily; member of the 12-spanner drug:H(+) antiporter DHA1 family; exports copper; has broad substrate specificity and can transport many mono- and divalent cations; transports a variety of drugs and is required for resistance to quinidine, barban, cisplatin, and bleomycin; contributes to potassium homeostasis; expression is regulated by c…
YDR454C	-1.2002	2.27847e-22	2.26225e-20	325.771	315.249	757.149	719.14	No	GUK1	Guanylate kinase; converts GMP to GDP; required for growth and mannose outer chain elongation of cell wall N-linked glycoproteins guanylate kinase
YFR018C	-1.2005	1.14951e-13	4.106e-12	63.563	56.557	146.736	130.023	No	YFR018C	hypothetical protein; SWAT-GFP and seamless GFP fusion proteins localize to the endoplasmic reticulum and mCherry fusion protein localizes to the vacuole hypothetical protein
YHR216W	-1.20129	2.10981e-13	7.31318e-12	61.542	60.208	152.876	127.989	No	IMD2	Inosine monophosphate dehydrogenase; catalyzes the rate-limiting step in GTP biosynthesis, expression is induced by mycophenolic acid resulting in resistance to the drug, expression is repressed by nutrient limitation; IMD2 has a paralog, YAR073W/YAR075W, that arose from a segmental duplication IMP dehydrogenase IMD2
YDR225W	-1.20316	1.85977e-09	3.39393e-08	432.627	380.163	759.134	1115.65	No	HTA1	Histone H2A; core histone protein required for chromatin assembly and chromosome function; one of two nearly identical subtypes (see also HTA2); DNA damage-dependent phosphorylation by Mec1p facilitates DNA repair; acetylated by Nat4p; N-terminally propionylated in vivo histone H2A
YFL052W	-1.21027	4.21676e-06	3.69787e-05	8.781	8.957	21.727	19.388	Yes	ZNF1	Zinc cluster transcription factor that regulates respiratory growth; binds to promoters of genes involved in respiration, gluconeogenesis, and the glyoxylate shunt; required for normal carbon source utilization and stress response DNA-binding domain containing protein
YDR089W	-1.21224	2.55656e-10	5.67285e-09	22.198	20.82	51.763	48.336	No	VTC5	Novel subunit of the vacuolar transporter chaperone complex; vacuolar transmembrane protein that regulates biosynthesis of polyphosphate; deletion reduces and overexpression increases polyP accumulation; SPX domain (Syg1, Pho81, Xpr1)-containing protein involved in phosphate homeostasis; relocalizes from vacuole to cytoplasm upon DNA replication stress hypothetical protein
YLR340W	-1.21322	5.25275e-14	1.94751e-12	1297.85	1213.62	3296	2542.45	No	RPP0	Conserved ribosomal protein P0 of the ribosomal stalk; involved in interaction between translational elongation factors and the ribosome; phosphorylated on serine 302; homologous to mammalian ribosomal protein LP0 and bacterial L10 ribosomal protein P0
YIR030C	-1.21382	0.00203855	0.00840974	3.375	4.778	8.309	10.505	No	DCG1	hypothetical protein; expression is sensitive to nitrogen catabolite repression and regulated by Dal80p; contains transmembrane domain Dcg1p
YJR139C	-1.21762	6.46088e-15	2.7426e-13	209.781	186.584	505.33	418.94	No	HOM6	Homoserine dehydrogenase (L-homoserine:NADP oxidoreductase); dimeric enzyme that catalyzes the third step in the common pathway for methionine and threonine biosynthesis; enzyme has nucleotide-binding, dimerization and catalytic regions homoserine dehydrogenase
YPL218W	-1.22334	4.84314e-20	3.94043e-18	521.68	468.332	1206.27	1110.99	No	SAR1	ARF family GTPase; component of the COPII vesicle coat; required for transport vesicle formation during ER to Golgi protein transport; lowers membrane rigidity aiding vesicle formation; localizes to ER-mitochondrial contact sites where it enhances membrane curvature, thereby reducing contact size via its N-terminal amphipathic helix; regulates mitochondrial fission and fusion dynamics Arf family …
YGL026C	-1.22633	2.3355e-12	6.94485e-11	105.41	102.258	276.782	210.565	No	TRP5	Tryptophan synthase; catalyzes the last step of tryptophan biosynthesis; regulated by the general control system of amino acid biosynthesis tryptophan synthase TRP5
YGR050C	-1.22963	1.11383e-10	2.57897e-09	25.119	22.574	53.663	58.464	No	YGR050C	hypothetical protein; mRNA identified as translated by ribosome profiling data hypothetical protein
YOL039W	-1.22963	1.12806e-14	4.72014e-13	2948.8	2568.98	7202.44	5771.6	No	RPP2A	Ribosomal protein P2 alpha; a component of the ribosomal stalk, which is involved in the interaction between translational elongation factors and the ribosome; free (non-ribosomal) P2 stimulates the phosphorylation of the eIF2 alpha subunit (Sui2p) by Gcn2p; regulates the accumulation of P1 (Rpp1Ap and Rpp1Bp) in the cytoplasm ribosomal protein P2A
YHR174W	-1.23355	4.31125e-20	3.55709e-18	5539.93	5172.72	13516	11737.3	No	ENO2	Enolase II, a phosphopyruvate hydratase; catalyzes conversion of 2-phosphoglycerate to phosphoenolpyruvate during glycolysis and the reverse reaction during gluconeogenesis; expression induced in response to glucose; ENO2 has a paralog, ENO1, that arose from the whole genome duplication phosphopyruvate hydratase ENO2
YMR105C	-1.23503	1.78807e-10	4.02865e-09	330.518	281.166	846.975	597.11	No	PGM2	Phosphoglucomutase; catalyzes the conversion from glucose-1-phosphate to glucose-6-phosphate, which is a key step in hexose metabolism; functions as the acceptor for a Glc-phosphotransferase; protein abundance increases in response to DNA replication stress; PGM2 has a paralog, PGM1, that arose from the whole genome duplication phosphoglucomutase PGM2
YMR195W	-1.24162	1.94618e-18	1.23921e-16	140.052	123.042	310.041	313.485	No	ICY1	hypothetical protein; required for viability in rich media of cells lacking mitochondrial DNA; mutants have an invasive growth defect with elongated morphology; induced by amino acid starvation; ICY1 has a paralog, ICY2, that arose from the whole genome duplication Icy1p
YLL052C	-1.24174	0.000248547	0.00138798	10.302	6.895	16.078	24.613	No	AQY2	Water channel that mediates water transport across cell membranes; only expressed in proliferating cells; controlled by osmotic signals; may be involved in freeze tolerance; disrupted by a stop codon in many S. cerevisiae strains Aqy2p
YJR029W	-1.24478	1.93502e-18	1.23921e-16	86.262	95.036	211.931	218.536	No	YJR029W	Retrotransposon TYA Gag and TYB Pol genes; transcribed/translated as one unit; polyprotein is processed to make a nucleocapsid-like protein (Gag), reverse transcriptase (RT), protease (PR), and integrase (IN); similar to retroviral genes gag-pol fusion protein
YEL017W	-1.24516	4.58726e-16	2.18473e-14	49.191	50.607	122.693	114.482	No	GTT3	hypothetical protein may be involved in glutathione metabolism; function suggested by computational analysis of large-scale protein-protein interaction data; N- and C-terminal fusion proteins localize to the cell periphery Gtt3p
YOR388C	-1.24596	1.25312e-07	1.57528e-06	22.569	22.837	63.957	44.056	No	FDH1	NAD(+)-dependent formate dehydrogenase; may protect cells from exogenous formate formate dehydrogenase (NAD+)
YKL060C	-1.25773	2.09801e-20	1.75574e-18	5942.04	5958.43	13153.3	15361.3	No	FBA1	Fructose 1,6-bisphosphate aldolase; required for glycolysis and gluconeogenesis; catalyzes conversion of fructose 1,6 bisphosphate to glyceraldehyde-3-P and dihydroxyacetone-P; locates to mitochondrial outer surface upon oxidative stress; N-terminally propionylated in vivo fructose-bisphosphate aldolase FBA1
YPL087W	-1.26549	6.73923e-16	3.18374e-14	93.68	82.455	226.183	198.347	No	YDC1	Alkaline dihydroceramidase, involved in sphingolipid metabolism; preferentially hydrolyzes dihydroceramide to a free fatty acid and dihydrosphingosine; has a minor reverse activity; YDC1 has a paralog, YPC1, that arose from the whole genome duplication alkaline dihydroceramidase
YPL048W	-1.26802	2.16859e-17	1.17626e-15	238.989	230.369	621.368	511.855	No	CAM1	One of two isoforms of the gamma subunit of eEF1B; stimulates the release of GDP from eEF1A (Tef1p/Tef2p) post association with the ribosomal complex with eEF1Balpha subunit; nuclear protein required for transcription of MXR1; binds the MXR1 promoter in the presence of other nuclear factors; binds calcium and phospholipids translation elongation factor EF1B gamma
YER053C	-1.27519	1.63232e-15	7.41249e-14	256.691	259.01	702.493	548.963	No	PIC2	Mitochondrial copper and phosphate carrier; imports copper and inorganic phosphate into mitochondria; functionally redundant with Mir1p but less abundant than Mir1p under normal conditions; expression is induced at high temperature Cu/Pi carrier
YEL027W	-1.27851	4.46124e-19	3.03883e-17	512.398	476.18	1303.47	1100.86	No	VMA3	Proteolipid subunit c of the V0 domain of vacuolar H(+)-ATPase; dicyclohexylcarbodiimide binding subunit; required for vacuolar acidification and important for copper and iron metal ion homeostasis H(+)-transporting V0 sector ATPase subunit c
YKL152C	-1.27989	4.33176e-23	4.87989e-21	9013.47	8212.81	21941.7	19989.9	No	GPM1	Tetrameric phosphoglycerate mutase; mediates the conversion of 3-phosphoglycerate to 2-phosphoglycerate during glycolysis and the reverse reaction during gluconeogenesis phosphoglycerate mutase GPM1
YJL052W	-1.28079	1.20744e-14	4.98589e-13	4791.53	4153.14	12260.2	9531.69	No	TDH1	Glyceraldehyde-3-phosphate dehydrogenase (GAPDH), isozyme 1; involved in glycolysis and gluconeogenesis; tetramer that catalyzes the reaction of glyceraldehyde-3-phosphate to 1,3 bis-phosphoglycerate; detected in the cytoplasm and cell wall; protein abundance increases in response to DNA replication stress; GAPDH-derived antimicrobial peptides secreted by S. cerevisiae are active against a wide v…
YNL037C	-1.28083	6.38928e-20	5.12718e-18	89.452	98.452	228.707	228.808	No	IDH1	Subunit of mitochondrial NAD(+)-dependent isocitrate dehydrogenase; complex catalyzes the oxidation of isocitrate to alpha-ketoglutarate in the TCA cycle isocitrate dehydrogenase (NAD(+)) IDH1
YOL086C	-1.28362	3.75143e-23	4.39518e-21	2252.27	2038.16	5449.33	5021.33	No	ADH1	Alcohol dehydrogenase; fermentative isozyme active as homo- or heterotetramers; required for the reduction of acetaldehyde to ethanol, the last step in the glycolytic pathway; ADH1 has a paralog, ADH5, that arose from the whole genome duplication alcohol dehydrogenase ADH1
YDL198C	-1.28656	1.10911e-18	7.38316e-17	153.914	139.657	382.232	335.841	No	GGC1	Mitochondrial GTP/GDP transporter; essential for mitochondrial genome maintenance; has a role in mitochondrial iron transport; member of the mitochondrial carrier family Ggc1p
YER044C	-1.28759	4.1754e-21	3.88246e-19	134.219	121.761	314.305	312.273	No	ERG28	Endoplasmic reticulum membrane protein; may facilitate protein-protein interactions between the Erg26p dehydrogenase and the Erg27p 3-ketoreductase and/or tether these enzymes to the ER, also interacts with Erg6p Erg28p
YDR366C	-1.29116	5.61773e-12	1.60689e-10	37.878	30.785	88.527	79.997	No	YDR366C	hypothetical protein
YGR192C	-1.3093	8.83074e-23	9.40554e-21	15552.7	14020.7	38751.2	34720.3	No	TDH3	Glyceraldehyde-3-phosphate dehydrogenase (GAPDH), isozyme 3; involved in glycolysis and gluconeogenesis; tetramer that catalyzes the reaction of glyceraldehyde-3-phosphate to 1,3 bis-phosphoglycerate; detected in the cytoplasm and cell wall; GAPDH-derived antimicrobial peptides secreted by S. cerevisiae are active against a wide variety of wine-related yeasts and bacteria; binds AU-rich RNA glyce…
YDR284C	-1.32472	9.65508e-17	4.87581e-15	94.032	78.758	226.55	207.341	No	DPP1	Diacylglycerol pyrophosphate (DGPP) phosphatase; zinc-regulated vacuolar membrane-associated lipid phosphatase, dephosphorylates DGPP to phosphatidate (PA) and Pi, then PA to diacylglycerol; involved in lipid signaling and cell metabolism bifunctional diacylglycerol diphosphate phosphatase/phosphatidate phosphatase
YCR031C	-1.33209	1.02671e-17	5.89654e-16	3032.75	2671.22	7953.74	6444.85	No	RPS14A	Protein component of the small (40S) ribosomal subunit; required for ribosome assembly and 20S pre-rRNA processing; mutations confer cryptopleurine resistance; homologous to mammalian ribosomal protein S14 and bacterial S11; RPS14A has a paralog, RPS14B, that arose from the whole genome duplication ribosomal 40S subunit protein S14A
YKR039W	-1.34166	6.70297e-06	5.60943e-05	29.904	24.781	47.928	90.858	No	GAP1	General amino acid permease; Gap1p senses the presence of amino acid substrates to regulate localization to the plasma membrane when needed; essential for invasive growth amino acid permease GAP1
YJR127C	-1.34717	6.76925e-13	2.19084e-11	24.507	25.916	69.005	59.742	Yes	RSF2	Zinc-finger protein; involved in transcriptional control of both nuclear and mitochondrial genes, many of which specify products required for glycerol-based growth, respiration, and other functions; RSF2 has a paralog, TDA9, that arose from the whole genome duplication; relocalizes from nucleus to cytoplasm upon DNA replication stress Rsf2p
YJR073C	-1.35834	3.72272e-23	4.39518e-21	3207.31	2814.29	8131.08	7346.31	No	OPI3	Methylene-fatty-acyl-phospholipid synthase; catalyzes the last two steps in phosphatidylcholine biosynthesis; also known as phospholipid methyltransferase bifunctional phosphatidyl-N-methylethanolamine N-methyltransferase/phosphatidyl-N-dimethylethanolamine N-methyltransferase
YLL053C	-1.36164	4.25537e-09	7.22549e-08	20.279	16.633	41.653	53.317	No	YLL053C	Putative protein; in the Sigma 1278B strain background YLL053C is contiguous with AQY2 which encodes an aquaporin hypothetical protein
YMR007W	-1.36292	0.000653314	0.00316814	11.915	4.796	21.972	20.966	No	YMR007W	hypothetical protein; conserved among S. cerevisiae strains; YMR007W is not an essential gene hypothetical protein
YGR035C	-1.37032	0.000218367	0.0012476	4.655	4.624	9.559	14.396	No	YGR035C	hypothetical protein, potential Cdc28p substrate; transcription is activated by paralogous transcription factors Yrm1p and Yrr1p along with genes involved in multidrug resistance; YGR035C has a paralog, YLR346C, that arose from the whole genome duplication hypothetical protein
YPL014W	-1.37759	7.15841e-07	7.48821e-06	58.686	68.547	218.72	112.925	No	CIP1	Cyclin-dependent kinase inhibitor; interacts with and inhibits the Cdc28p/Cln2p, G1/S phase cyclin-dependent kinase complex but not S-phase, or M-phase complexes; overexpression blocks cells in G1 phase and stabilizes the Cdc28p inhibitor Sic1p, while disruption accelerates the G1/S phase transition; phosphorylated during S phase in a Cdc28p-dependent manner; green fluorescent protein (GFP)-fusio…
YCL025C	-1.38322	3.67554e-16	1.76486e-14	113.959	97.262	249.589	302.557	No	AGP1	Low-affinity amino acid permease with broad substrate range; involved in uptake of asparagine, glutamine, and other amino acids; expression regulated by SPS plasma membrane amino acid sensor system (Ssy1p-Ptr3p-Ssy5p); AGP1 has a paralog, GNP1, that arose from the whole genome duplication amino acid transporter AGP1
YDR410C	-1.38979	2.49166e-15	1.09746e-13	48.032	42.068	128.22	108.601	No	STE14	Farnesyl cysteine-carboxyl methyltransferase; mediates the carboxyl methylation step during C-terminal CAAX motif processing of a-factor and RAS proteins in the endoplasmic reticulum, localizes to the ER membrane protein-S-isoprenylcysteine carboxyl O-methyltransferase
YJR009C	-1.39954	1.04169e-33	2.90582e-31	2634.81	2570.16	6974.81	6788.64	No	TDH2	Glyceraldehyde-3-phosphate dehydrogenase (GAPDH), isozyme 2; involved in glycolysis and gluconeogenesis; tetramer that catalyzes reaction of glyceraldehyde-3-phosphate to 1,3 bis-phosphoglycerate; detected in cytoplasm and cell wall; protein abundance increases in response to DNA replication stress; GAPDH-derived antimicrobial peptides are active against a wide variety of wine-related yeasts and …
YOR192C-C	-1.40912	3.03027e-07	3.44686e-06	26.862	23.918	86.272	49.159	No	YOR192C-C	hypothetical protein; identified by expression profiling and mass spectrometry hypothetical protein
YDR050C	-1.42157	6.76589e-26	1.04302e-23	4308.67	4093.45	12138.3	10425.4	No	TPI1	Triose phosphate isomerase, abundant glycolytic enzyme; mRNA half-life is regulated by iron availability; transcription is controlled by activators Reb1p, Gcr1p, and Rap1p through binding sites in the 5' non-coding region; inhibition of Tpi1p activity by PEP (phosphoenolpyruvate) stimulates redox metabolism in respiring cells; E104D mutation in human homolog TPI1 causes a rare autosomal disease; …
YMR215W	-1.42328	2.14032e-14	8.30329e-13	28.049	26.307	78.993	67.057	No	GAS3	Putative 1,3-beta-glucanosyltransferase; has similarity go other GAS family members; low abundance, possibly inactive member of the GAS family of GPI-containing proteins; localizes to the cell wall; mRNA induced during sporulation putative 1,3-beta-glucanosyltransferase
YBR145W	-1.4431	1.03734e-29	1.89898e-27	197.884	187.883	537.694	513.644	No	ADH5	Alcohol dehydrogenase isoenzyme V; involved in ethanol production; ADH5 has a paralog, ADH1, that arose from the whole genome duplication alcohol dehydrogenase ADH5
YDL182W	-1.45118	2.14361e-31	4.48474e-29	191.904	189.618	532.069	513.578	No	LYS20	Homocitrate synthase isozyme and functions in DNA repair; catalyzes the condensation of acetyl-CoA and alpha-ketoglutarate to form homocitrate, which is the first step in the lysine biosynthesis pathway; LYS20 has a paralog, LYS21, that arose from the whole genome duplication homocitrate synthase LYS20
YMR120C	-1.45625	8.4659e-23	9.35722e-21	145.235	156.08	382.232	446.165	No	ADE17	Enzyme of 'de novo' purine biosynthesis; contains both 5-aminoimidazole-4-carboxamide ribonucleotide transformylase and inosine monophosphate cyclohydrolase activities; ADE17 has a paralog, ADE16, that arose from the whole genome duplication; ade16 ade17 mutants require adenine and histidine bifunctional phosphoribosylaminoimidazolecarboxamide formyltransferase/IMP cyclohydrolase ADE17
YOR153W	-1.46109	1.04151e-16	5.21469e-15	55.199	51.697	164.334	130.979	No	PDR5	Plasma membrane ATP-binding cassette (ABC) transporter; multidrug transporter actively regulated by Pdr1p; also involved in steroid transport, cation resistance, and cellular detoxification during exponential growth; PDR5 has a paralog, PDR15, that arose from the whole genome duplication ATP-binding cassette multidrug transporter PDR5
YPL257W-B	-1.48153	7.61376e-13	2.43724e-11	39.278	50.598	109.813	141.407	No	YPL257W-B	Retrotransposon TYA Gag and TYB Pol genes; transcribed/translated as one unit; polyprotein is processed to make a nucleocapsid-like protein (Gag), reverse transcriptase (RT), protease (PR), and integrase (IN); similar to retroviral genes gag-pol fusion protein
YLR089C	-1.49303	2.06142e-20	1.75012e-18	72.483	68.075	216.489	180.327	No	ALT1	Alanine transaminase (glutamic pyruvic transaminase); involved in alanine biosynthesis and catabolism; TOR1-independent role in determining chronological lifespan; expression is induced in the presence of alanine; repression is mediated by Nrg1p; ALT1 has a paralog, ALT2, that arose from the whole genome duplication; Alt2p is catalytically inactive alanine transaminase ALT1
YBR031W	-1.49791	6.31352e-12	1.77811e-10	1599.06	1456.05	5365.42	3288.94	No	RPL4A	Ribosomal 60S subunit protein L4A; N-terminally acetylated; homologous to mammalian ribosomal protein L4 and bacterial L4; RPL4A has a paralog, RPL4B, that arose from the whole genome duplication ribosomal 60S subunit protein L4A
YOR136W	-1.50048	1.07565e-31	2.52046e-29	160.08	158.706	465.98	438.005	No	IDH2	Subunit of mitochondrial NAD(+)-dependent isocitrate dehydrogenase; complex catalyzes the oxidation of isocitrate to alpha-ketoglutarate in the TCA cycle; phosphorylated isocitrate dehydrogenase (NAD(+)) IDH2
YDR382W	-1.50337	2.91201e-17	1.55078e-15	3234.62	2795.65	9865.04	7278.49	No	RPP2B	Ribosomal protein P2 beta; a component of the ribosomal stalk, which is involved in the interaction between translational elongation factors and the ribosome; free (non-ribosomal) P2 stimulates the phosphorylation of the eIF2 alpha subunit (Sui2p) by Gcn2p; regulates the accumulation of P1 (Rpp1Ap and Rpp1Bp) in the cytoplasm ribosomal protein P2B
YJR118C	-1.5115	3.32624e-24	4.33003e-22	62.441	64.042	171.674	189.81	No	ILM1	hypothetical protein; may be involved in mitochondrial DNA maintenance; required for slowed DNA synthesis-induced filamentous growth Ilm1p
YBR115C	-1.52994	6.21078e-22	5.96439e-20	49.858	52.251	158.072	137.416	No	LYS2	Alpha aminoadipate reductase; catalyzes the reduction of alpha-aminoadipate to alpha-aminoadipate 6-semialdehyde, which is the fifth step in biosynthesis of lysine; activation requires posttranslational phosphopantetheinylation by Lys5p L-aminoadipate-semialdehyde dehydrogenase
YMR274C	-1.54558	3.46022e-10	7.42489e-09	8.855	9.084	25.416	27.125	No	RCE1	Type II CAAX prenyl protease; involved in the proteolysis and maturation of Ras and the a-factor mating pheromone CAAX prenyl protease
YMR189W	-1.55743	5.34235e-09	8.94156e-08	35.245	30.349	70.819	122.664	No	GCV2	P subunit of the mitochondrial glycine decarboxylase complex; glycine decarboxylase is required for the catabolism of glycine to 5,10-methylene-THF; expression is regulated by levels of 5,10-methylene-THF in the cytoplasm glycine decarboxylase subunit P
YCL021W-A	-1.56478	1.33717e-13	4.71875e-12	21.818	27.025	80.635	64.289	No	YCL021W-A	hypothetical protein; SWAT-GFP and mCherry fusion proteins localize to the vacuole hypothetical protein
YJL218W	-1.5654	4.35699e-06	3.80376e-05	3.95	4.233	11.691	12.495	No	YJL218W	Putative acetyltransferase; similar to bacterial galactoside O-acetyltransferases; induced by oleate in an OAF1/PIP2-dependent manner; promoter contains an oleate response element consensus sequence; non-essential gene acetyltransferase
YDR246W-A	-1.58009	5.9518e-06	5.06768e-05	14.001	9.193	24.24	45.212	No	YDR246W-A	hypothetical protein; identified by fungal homology and RT-PCR hypothetical protein
YBL044W	-1.59428	0.000619189	0.00303148	1.919	2.062	6.483	5.781	No	YBL044W	hypothetical protein; YBL044W is not an essential protein hypothetical protein
YAL062W	-1.59593	3.93533e-19	2.74442e-17	23.506	23.618	74.606	68.269	No	GDH3	NADP(+)-dependent glutamate dehydrogenase; synthesizes glutamate from ammonia and alpha-ketoglutarate; rate of alpha-ketoglutarate utilization differs from Gdh1p; expression regulated by nitrogen and carbon sources; GDH3 has a paralog, GDH1, that arose from the whole genome duplication glutamate dehydrogenase (NADP(+)) GDH3
YGL256W	-1.61466	2.72547e-32	6.65243e-30	336.991	362.604	1145.24	1002.21	No	ADH4	Alcohol dehydrogenase isoenzyme type IV; dimeric enzyme demonstrated to be zinc-dependent despite sequence similarity to iron-activated alcohol dehydrogenases; transcription is induced in response to zinc deficiency alcohol dehydrogenase ADH4
YBR291C	-1.62909	1.47726e-31	3.32837e-29	105.725	97.525	327.099	303.257	No	CTP1	Mitochondrial inner membrane citrate transporter; member of the mitochondrial carrier family Ctp1p
YDL081C	-1.63666	1.91555e-15	8.56587e-14	2104.37	1772.38	7282.06	4808.02	No	RPP1A	Ribosomal stalk protein P1 alpha; involved in the interaction between translational elongation factors and the ribosome; free (non-ribosomal) P1 stimulates the phosphorylation of the eIF2 alpha subunit (Sui2p) by Gcn2p; accumulation of P1 in the cytoplasm is regulated by phosphorylation and interaction with the P2 stalk component ribosomal protein P1A
YOR034C-A	-1.63812	0.00547329	0.0191418	1.103	4.787	10.6	7.76	No	YOR034C-A	hypothetical protein; identified by expression profiling and mass spectrometry hypothetical protein
YHR162W	-1.64703	3.78071e-26	5.98579e-24	591.576	491.796	1829.04	1572.83	No	MPC2	Highly conserved subunit of the mitochondrial pyruvate carrier (MPC); expressed during growth on fermentable carbon sources, and heterodimerizes with Mpc1p to form the fermentative isoform of MPC; MPC localizes to the mitochondrial inner membrane and mediates pyruvate uptake; MPC2 paralog, MPC3, heterodimerizes with Mpc1p to form the respiratory MPC isoform mitochondrial pyruvate carrier
YBR072W	-1.64782	1.78545e-17	9.89534e-16	1020.12	1019.8	3837.34	2572.67	No	HSP26	Small heat shock protein (sHSP) with chaperone activity; forms hollow, sphere-shaped oligomers that suppress unfolded proteins aggregation; long-lived protein that is preferentially retained in mother cells and forms cytoplasmic foci; oligomer activation requires heat-induced conformational change; also has mRNA binding activity chaperone protein HSP26
YOL131W	-1.65284	2.74107e-07	3.16087e-06	5.536	6.422	22.267	15.408	No	YOL131W	hypothetical protein; YOL131W has a paralog, STB1, that arose from the whole genome duplication hypothetical protein
YOL154W	-1.71275	8.00209e-35	2.75743e-32	774.18	825.948	2428.28	2826.98	No	ZPS1	Putative GPI-anchored protein; transcription is induced under low-zinc conditions, as mediated by the Zap1p transcription factor, and at alkaline pH Zps1p
YCL030C	-1.71888	8.25652e-26	1.24017e-23	118.261	121.225	442.77	347.625	No	HIS4	Multifunctional enzyme containing phosphoribosyl-ATP pyrophosphatase; phosphoribosyl-AMP cyclohydrolase, and histidinol dehydrogenase activities; catalyzes the second, third, ninth and tenth steps in histidine biosynthesis trifunctional histidinol dehydrogenase/phosphoribosyl-AMP cyclohydrolase/phosphoribosyl-ATP diphosphatase
YPR151C	-1.78887	9.19104e-13	2.86564e-11	9.356	7.985	32.156	28.026	No	SUE1	Protein required for degradation of unstable forms of cytochrome c; located in the mitochondria Sue1p
YAL061W	-1.80572	1.68712e-20	1.4534e-18	47.123	41.759	178.488	133.18	No	BDH2	Putative medium-chain alcohol dehydrogenase with similarity to BDH1; transcription induced by constitutively active PDR1 and PDR3 putative dehydrogenase BDH2
YOL058W	-1.80946	1.85633e-31	4.02755e-29	120.515	104.12	368.434	420.507	No	ARG1	Arginosuccinate synthetase; catalyzes the formation of L-argininosuccinate from citrulline and L-aspartate in the arginine biosynthesis pathway; potential Cdc28p substrate argininosuccinate synthase
YIL094C	-1.82518	2.62798e-41	1.39952e-38	296.321	319.21	1162.3	1023.99	No	LYS12	Homo-isocitrate dehydrogenase; an NAD-linked mitochondrial enzyme required for the fourth step in the biosynthesis of lysine, in which homo-isocitrate is oxidatively decarboxylated to alpha-ketoadipate homoisocitrate dehydrogenase
YHR214C-D	-1.87463	2.792e-06	2.5279e-05	3.422	6.168	13.394	21.8	No	YHR214C-D	hypothetical protein; identified by gene-trapping, microarray-based expression analysis, and genome-wide homology searching; SWAT-GFP and mCherry fusion proteins localize to the nucleus and endoplasmic reticulum respectively; YHR214C-D has a paralog, YAR069C, that arose from a segmental duplication hypothetical protein
YMR105W-A	-1.87689	1.67603e-06	1.58357e-05	6.787	3.715	14.73	23.979	No	YMR105W-A	hypothetical protein
YHR029C	-1.93084	1.36829e-22	1.40622e-20	31.508	26.807	98.686	124.087	No	YHI9	hypothetical protein; null mutant is defective in unfolded protein response; possibly involved in a membrane regulation metabolic pathway; member of the PhzF superfamily, though most likely not involved in phenazine production Yhi9p
YNL195C	-1.95068	7.93682e-21	7.1243e-19	45.38	39.897	194.137	136.337	No	YNL195C	hypothetical protein; shares a promoter with YNL194C; the authentic, non-tagged protein is detected in highly purified mitochondria in high-throughput studies; YNL195C has a paralog, HBT1, that arose from the whole genome duplication hypothetical protein
YDR345C	-1.95144	1.1646e-52	9.74601e-50	234.993	220.84	858.224	908.694	No	HXT3	Low affinity glucose transporter of the major facilitator superfamily; expression is induced in low or high glucose conditions; HXT3 has a paralog, HXT5, that arose from the whole genome duplication hexose transporter HXT3
YDR281C	-2.0065	0.000562577	0.0027905	0.937	2.534	5.012	8.971	No	PHM6	hypothetical protein; expression is regulated by phosphate levels Phm6p
YBR047W	-2.01098	4.09891e-21	3.87281e-19	13.028	12.727	47.817	56.396	No	FMP23	hypothetical protein; proposed to be involved in iron or copper homeostasis; the authentic, non-tagged protein is detected in highly purified mitochondria in high-throughput studies Fmp23p
YOR383C	-2.03674	1.66055e-19	1.24712e-17	666.313	547.271	3093.04	1901.84	No	FIT3	Mannoprotein that is incorporated into the cell wall; incorporated via a glycosylphosphatidylinositol (GPI) anchor; involved in the retention of siderophore-iron in the cell wall Fit3p
YNR050C	-2.05288	3.04304e-56	2.97102e-53	398.226	399.83	1761.61	1558.02	No	LYS9	Saccharopine dehydrogenase (NADP+, L-glutamate-forming); catalyzes the formation of saccharopine from alpha-aminoadipate 6-semialdehyde, the seventh step in lysine biosynthesis pathway; exhibits genetic and physical interactions with TRM112 saccharopine dehydrogenase (NADP+, L-glutamate-forming)
YHR140W	-2.06016	1.77638e-08	2.65461e-07	7.149	3.824	18.97	27.07	No	YHR140W	Putative integral membrane hypothetical protein hypothetical protein
YGL204C	-2.06188	2.823e-22	2.75619e-20	11.702	10.982	45.587	49.592	No	YGL204C	hypothetical protein; mRNA identified as translated by ribosome profiling data; SWAT-GFP and mCherry fusion proteins localize to the endoplasmic reticulum hypothetical protein
YBR147W	-2.08073	1.67486e-33	4.45971e-31	50.183	44.529	221.109	180.749	No	RTC2	Putative vacuolar membrane transporter for cationic amino acids; likely contributes to amino acid homeostasis by exporting cationic amino acids from the vacuole; positive regulation by Lys14p suggests that lysine may be the primary substrate; member of the PQ-loop family, with seven transmembrane domains; similar to mammalian PQLC2 vacuolar transporter; RTC2 has a paralog, YPQ1, that arose from t…
YKL043W	-2.20068	1.71086e-18	1.11358e-16	19.157	21.211	114.519	71.404	Yes	PHD1	Transcriptional activator that enhances pseudohyphal growth; physically interacts with the Tup1-Cyc8 complex and recruits Tup1p to its targets; regulates expression of FLO11, an adhesin required for pseudohyphal filament formation; similar to StuA, an A. nidulans developmental regulator; potential Cdc28p substrate; PHD1 has a paralog, SOK2, that arose from the whole genome duplication Phd1p
YHR092C	-2.30893	2.41091e-39	1.08639e-36	74.699	65.904	393.237	305.392	No	HXT4	High-affinity glucose transporter; member of the major facilitator superfamily, expression is induced by low levels of glucose and repressed by high levels of glucose; HXT4 has a paralog, HXT7, that arose from the whole genome duplication hexose transporter HXT4
YER188W	-2.33957	2.50386e-09	4.48551e-08	4.191	2.08	14.804	16.887	No	YER188W	hypothetical protein; conserved across S. cerevisiae strains; large-scale analyses show mRNA expression increases under anaerobic conditions and two-hybrid interactions with Sst2p hypothetical protein
YER078W-A	-2.34647	3.99398e-19	2.75256e-17	15.244	16.76	101.554	61.754	No	YER078W-A	hypothetical protein; identified by fungal homology and RT-PCR hypothetical protein
YGR236C	-2.48914	9.88621e-31	1.93045e-28	67.43	76.187	491.126	317.454	No	SPG1	Protein required for high temperature survival during stationary phase; not required for growth on nonfermentable carbon sources; the authentic, non-tagged protein is detected in highly purified mitochondria in high-throughput studies Spg1p
YOR382W	-2.49057	1.00898e-68	1.97019e-65	230.941	212.637	1344.98	1154.34	No	FIT2	Mannoprotein that is incorporated into the cell wall; incorporated via a glycosylphosphatidylinositol (GPI) anchor; involved in the retention of siderophore-iron in the cell wall Fit2p
YMR107W	-2.54706	2.77616e-34	8.17015e-32	118.354	112.014	819.488	530.942	No	SPG4	Protein required for high temperature survival during stationary phase; not required for growth on nonfermentable carbon sources Spg4p
YLL057C	-2.5584	9.7385e-28	1.62995e-25	40.938	36	280.997	174.101	No	JLP1	Fe(II)-dependent sulfonate/alpha-ketoglutarate dioxygenase; involved in sulfonate catabolism for use as a sulfur source; contains sequence that resembles a J domain (typified by the E. coli DnaJ protein); induced by sulphur starvation sulfonate dioxygenase
YHL005C	-2.72941	0.00495854	0.0175937	0.278	0.3	2.39	1.401	No	YHL005C	hypothetical protein; conserved among S. cerevisiae strains; YHL005C is not an essential gene hypothetical protein
YPL223C	-3.25052	2.88618e-43	1.69072e-40	108.674	79.448	1098.28	697.495	No	GRE1	Hydrophilin essential in desiccation-rehydration process; stress induced (osmotic, ionic, oxidative, heat shock and heavy metals); regulated by the HOG pathway; GRE1 has a paralog, SIP18, that arose from the whole genome duplication Gre1p
YIL057C	-3.31827	1.41037e-22	1.42448e-20	1.994	2.135	20.784	20.444	No	RGI2	hypothetical protein; involved in energy metabolism under respiratory conditions; expression induced under carbon limitation and repressed under high glucose; RGI2 has a paralog, RGI1, that arose from the whole genome duplication Rgi2p
YGR087C	-3.32426	2.7894e-34	8.17015e-32	8.104	9.002	106.37	65.1	No	PDC6	Minor isoform of pyruvate decarboxylase; decarboxylates pyruvate to acetaldehyde, involved in amino acid catabolism; transcription is glucose- and ethanol-dependent, and is strongly induced during sulfur limitation indolepyruvate decarboxylase 6
YHL046C	-3.38021	9.33333e-06	7.51026e-05	0.334	0.409	4.595	3.179	No	PAU13	hypothetical protein; member of the seripauperin multigene family encoded mainly in subtelomeric regions; expression is induced after ethanol shock; SWAT-GFP and mCherry fusion proteins localize to the endoplasmic reticulum and vacuole respectively seripauperin PAU13
YOR387C	-3.57904	1.00153e-66	1.46674e-63	26.186	20.294	238.793	317.165	No	YOR387C	hypothetical protein; regulated by the metal-responsive Aft1p transcription factor; highly inducible in zinc-depleted conditions; localizes to the soluble fraction; SWAT-GFP and mCherry fusion proteins localize to the endoplasmic reticulum and vacuole respectively; YOR387C has a paralog, VEL1, that arose from a single-locus duplication hypothetical protein
YMR175W	-3.722	1.21375e-65	1.42203e-62	127.441	89.477	1672.35	1199.89	No	SIP18	Phospholipid-binding hydrophilin; essential to overcome desiccation-rehydration process; expression is induced by osmotic stress; SIP18 has a paralog, GRE1, that arose from the whole genome duplication Sip18p
YGL258W	-3.91219	3.3649e-129	1.97116e-125	17.451	15.561	242.187	256.411	No	VEL1	hypothetical protein; highly induced in zinc-depleted conditions and has increased expression in NAP1 deletion mutants; VEL1 has a paralog, YOR387C, that arose from a single-locus duplication Vel1p
YOR011W-A	-7.31889	9.07981e-06	7.33726e-05	0	0	2.549	2.379	No	YOR011W-A	hypothetical protein
YBR012W-A	-8.40003	1.30365e-07	1.63528e-06	0	0	7.353	2.89	No	YBR012W-A	Retrotransposon TYA Gag gene co-transcribed with TYB Pol; translated as TYA or TYA-TYB polyprotein; Gag is a nucleocapsid protein that is the structural constituent of virus-like particles (VLPs); similar to retroviral Gag gag protein
YGR038C-B	-8.97412	2.99488e-05	0.000210179	0	0.009	3.198	12.006	No	YGR038C-B	Retrotransposon TYA Gag and TYB Pol genes; transcribed/translated as one unit; polyprotein is processed to make a nucleocapsid-like protein (Gag), reverse transcriptase (RT), protease (PR), and integrase (IN); similar to retroviral genes gag-pol fusion protein
YGL041C-B	-9.1115	2.59495e-09	4.6261e-08	0	0	5.894	10.895	No	YGL041C-B	hypothetical protein; identified by fungal homology and RT-PCR; SWAT-GFP and mCherry fusion proteins localize to the endoplasmic reticulum hypothetical protein
YLR162W-A	-10.0259	0.000133651	0.000802513	0	0	27.512	4.258	No	RRT15	hypothetical protein; identified by fungal homology comparisons and RT-PCR; identified in a screen for mutants with decreased levels of rDNA transcription Rrt15p
YAR020C	-10.709	9.1229e-09	1.44438e-07	0	0	13.554	37.208	No	PAU7	Member of the seripauperin multigene family; active during alcoholic fermentation, regulated by anaerobiosis, inhibited by oxygen, repressed by heme seripauperin PAU7
YGR146C-A	-11.7244	1.19254e-15	5.46166e-14	0	0	43.455	59.297	No	YGR146C-A	hypothetical protein

## Sheet: R238K vs. WT
Gene ID	log2(Fold_change)	p-value	FDR p-value correction	mRNA expression level at Normal condition				YEASTRACT 2019 TF	Gene	Gene Function
				Spt15 mutant strain R238K		Wild type strain BY4741
				Duplicate#1	Duplicate#2	Duplicate#1	Duplicate#2
YDR039C	8.93395	4.62302e-09	5.68611e-08	6.571	8.737	0	0	No	ENA2	P-type ATPase sodium pump; involved in Na+ efflux to allow salt tolerance; likely not involved in Li+ efflux Na(+)-exporting P-type ATPase ENA2
YPR108W-A	8.56163	4.00335e-08	4.21291e-07	5.186	6.594	0	0	No	YPR108W-A	hypothetical protein; identified by fungal homology and RT-PCR hypothetical protein
YKR034W	3.75226	3.60505e-13	9.42485e-12	10.106	26.404	1.495	1.223	Yes	DAL80	Negative regulator of genes in multiple nitrogen degradation pathways; expression is regulated by nitrogen levels and by Gln3p; member of the GATA-binding family, forms homodimers and heterodimers with Gzf3p; DAL80 has a paralog, GZF3, that arose from the whole genome duplication Dal80p
YAL067C	3.49903	0.0003908	0.00147562	29.198	127.782	8.039	6.159	No	SEO1	Putative permease; member of the allantoate transporter subfamily of the major facilitator superfamily; mutation confers resistance to ethionine sulfoxide putative permease SEO1
YJR010W	3.36132	3.77126e-05	0.000192357	305.397	1014.29	76.04	55.017	No	MET3	ATP sulfurylase; catalyzes the primary step of intracellular sulfate activation, essential for assimilatory reduction of sulfate to sulfide, involved in methionine metabolism; human homolog PAPSS2 complements yeast null mutant sulfate adenylyltransferase
YKL001C	3.15332	4.10931e-06	2.72242e-05	697.195	1655.21	165.817	103.743	No	MET14	Adenylylsulfate kinase; required for sulfate assimilation and involved in methionine metabolism; human homolog PAPSS2 complements yeast null mutant adenylyl-sulfate kinase
YFR030W	2.97587	9.25885e-05	0.000424698	196.276	540.073	58.883	36.597	No	MET10	Subunit alpha of assimilatory sulfite reductase; complex converts sulfite into sulfide sulfite reductase subunit alpha
YDL059C	2.92048	0.0013496	0.00441041	77.62	300.12	28.467	22.467	No	RAD59	Protein involved DNA double-strand break repair; repairs breaks in DNA during vegetative growth via recombination and single-strand annealing; anneals complementary single-stranded DNA; forms nuclear foci upon DNA replication stress; required for loading of Rad52p to DSBs; regulates replication fork progression in DNA ligase I-deficient cells; paralog of Rad52p Rad59p
YFL066C	2.89254	0.000470423	0.00173632	3.525	4.121	0.711	0.322	No	YFL066C	Helicase-like protein encoded within the telomeric Y' element; induced by treatment with 8-methoxypsoralen and UVA irradiation; SWAT-GFP and mCherry fusion proteins localize to the nucleus Y' element ATP-dependent helicase
YPL187W	2.88811	3.09182e-25	4.50633e-23	31.765	45.109	4.424	6.148	No	MF(ALPHA)1	Mating pheromone alpha-factor, made by alpha cells; interacts with mating type a cells to induce cell cycle arrest and other responses leading to mating; also encoded by MF(ALPHA)2, although MF(ALPHA)1 produces most alpha-factor; binds copper(II) ions Mf(alpha)1p
YML054C	2.80817	3.01185e-54	8.77955e-51	259.277	302.729	45.256	36.486	No	CYB2	Cytochrome b2 (L-lactate cytochrome-c oxidoreductase); component of the mitochondrial intermembrane space, required for lactate utilization; expression is repressed by glucose and anaerobic conditions Cyb2p
YIR017C	2.69847	1.48674e-05	8.45626e-05	309.594	602.238	91.444	51.638	Yes	MET28	bZIP transcriptional activator in the Cbf1p-Met4p-Met28p complex; participates in the regulation of sulfur metabolism Met28p
YBR213W	2.69502	6.97643e-06	4.28132e-05	99.259	239.099	26.887	26.514	No	MET8	Bifunctional dehydrogenase and ferrochelatase; involved in the biosynthesis of siroheme, a prosthetic group used by sulfite reductase; required for sulfate assimilation and methionine biosynthesis bifunctional precorrin-2 dehydrogenase/sirohydrochlorin ferrochelatase MET8
YMR322C	2.68648	4.24218e-15	1.48988e-13	13.509	14.312	1.936	2.401	No	SNO4	Possible chaperone and cysteine protease; required for transcriptional reprogramming during the diauxic shift and for survival in stationary phase; similar to bacterial Hsp31 and yeast Hsp31p, Hsp32p, and Hsp33p; DJ-1/ThiJ/PfpI superfamily member; predicted involvement in pyridoxine metabolism; induced by mild heat stress and copper deprivation glutathione-independent methylglyoxalase family prot…
YMR184W	2.6697	7.70719e-41	5.61661e-38	421.475	305.958	53.834	62.577	No	ADD37	hypothetical protein; involved in ER-associated protein degradation; green fluorescent protein (GFP)-fusion protein localizes to the cytoplasm and is induced in response to the DNA-damaging agent MMS; YMR184W is not an essential gene; protein abundance increases in response to DNA replication stress Add37p
YJR137C	2.65	3.26297e-19	1.90231e-17	118.972	181.821	30.612	18.176	No	MET5	Sulfite reductase beta subunit; involved in amino acid biosynthesis, transcription repressed by methionine sulfite reductase (NADPH) subunit beta
YKR069W	2.59029	0.00050306	0.00184224	158.714	389.804	59.778	33.05	No	MET1	S-adenosyl-L-methionine uroporphyrinogen III transmethylase; involved in the biosynthesis of siroheme, a prosthetic group used by sulfite reductase; required for sulfate assimilation and methionine biosynthesis uroporphyrinogen-III C-methyltransferase
YLR092W	2.55196	4.25714e-05	0.000214513	129.027	227.26	40.992	20.9	No	SUL2	High affinity sulfate permease; sulfate uptake is mediated by specific sulfate transporters Sul1p and Sul2p, which control the concentration of endogenous activated sulfate intermediates sulfate permease
YMR031C	2.3831	3.28835e-31	9.58555e-29	268.67	359.667	54.753	68.18	No	EIS1	Component of the eisosome required for proper eisosome assembly; similar to Uso1p; authentic, non-tagged protein is detected in a phosphorylated state in highly purified mitochondria in high-throughput studies; protein increases in abundance and relocalizes from plasma membrane to cytoplasm upon DNA replication stress; EIS1 has a paralog, YKL050C, that arose from the whole genome duplication Eis1p
YMR052W	2.35015	1.95875e-29	4.5678e-27	55.36	54.99	8.946	13.051	No	FAR3	hypothetical protein; involved in recovery from cell cycle arrest in response to pheromone, in a Far1p-independent pathway; interacts with Far7p, Far8p, Far9p, Far10p, and Far11p; localizes to the endoplasmic reticulum; protein abundance increases in response to DNA replication stress Far3p
YMR030W	2.32645	2.69982e-42	2.62332e-39	98.23	115.235	20.833	22.512	No	RSF1	Protein required for respiratory growth; localized to both the nucleus and mitochondrion; may interact with transcription factors to mediate the transition to respiratory growth and activate transcription of nuclear and mitochondrial genes Rsf1p
YMR219W	2.32446	2.47254e-28	4.80497e-26	58.783	74.538	11.985	15.186	No	ESC1	Protein involved in telomeric silencing; required for quiescent cell telomere hypercluster localization at nuclear membrane vicinity; interacts with PAD4-domain of Sir4p Esc1p
YMR112C	2.27321	2.00066e-30	5.30176e-28	194.32	189.559	33.198	47.803	No	MED11	Subunit of the RNA polymerase II mediator complex; associates with core polymerase subunits to form the RNA polymerase II holoenzyme; essential protein Med11p
YJL133C-A	2.22808	3.95108e-09	4.91147e-08	2396.93	5137.14	882.868	757.504	No	YJL133C-A	hypothetical protein; the authentic, non-tagged protein is detected in highly purified mitochondria in high-throughput studies hypothetical protein
YMR081C	2.22754	2.07156e-43	2.41543e-40	716.654	792.447	170.645	157.626	No	ISF1	Serine-rich, hydrophilic protein; overexpression suppresses growth defects of hap2, hap3, and hap4 mutants; expression is under glucose control; cotranscribed with NAM7 in a cyp1 mutant; ISF1 has a paralog, MBR1, that arose from the whole genome duplication Isf1p
YMR251W-A	2.22616	4.17311e-25	5.93396e-23	2456.47	2181.27	453.775	556.333	No	HOR7	hypothetical protein; overexpression suppresses Ca2+ sensitivity of mutants lacking inositol phosphorylceramide mannosyltransferases Csg1p and Csh1p; transcription is induced under hyperosmotic stress and repressed by alpha factor; HOR7 has a paralog, DDR2, that arose from the whole genome duplication Hor7p
YML053C	2.22304	1.63419e-54	8.77955e-51	142.709	137.498	30.833	30.282	No	YML053C	hypothetical protein; green fluorescent protein (GFP)-fusion protein localizes to the cytoplasm and the nucleus; overexpression causes a cell cycle delay or arrest; YML053C is not an essential gene hypothetical protein
YGL184C	2.22051	0.00134846	0.00440917	324.753	268.102	94.74	34.429	No	STR3	Peroxisomal cystathionine beta-lyase; converts cystathionine into homocysteine; may be redox regulated by Gto1p; involved in the release of the aromatic thiol 3-mercaptohexanol during wine fermentation cystathionine beta-lyase STR3
YNL191W	2.20409	0.000501902	0.00183915	73.097	134.977	30.391	15.63	No	DUG3	Component of glutamine amidotransferase (GATase II); forms a complex with Dug2p to degrade glutathione (GSH) and other peptides containing a gamma-glu-X bond in an alternative pathway to GSH degradation by gamma-glutamyl transpeptidase (Ecm38p) glutamine amidotransferase subunit DUG3
YLR410W-B	2.19295	7.4397e-22	6.88467e-20	37.338	40.328	7.022	10.261	No	YLR410W-B	Retrotransposon TYA Gag and TYB Pol genes; transcribed/translated as one unit; polyprotein is processed to make a nucleocapsid-like protein (Gag), reverse transcriptase (RT), protease (PR), and integrase (IN); similar to retroviral genes gag-pol fusion protein
YMR301C	2.17102	6.02786e-12	1.27791e-10	60.056	122.885	21.972	19.488	No	ATM1	Mitochondrial inner membrane ATP-binding cassette (ABC) transporter; exports mitochondrially synthesized precursors of iron-sulfur (Fe/S) clusters to the cytosol; human homolog ABCB7 can complement yeast null mutant ATP-binding cassette Fe/S cluster precursor transporter ATM1
YLR307W	2.15954	0.000994391	0.00336856	3.331	7.68	1.213	1.29	No	CDA1	Chitin deacetylase; together with Cda2p involved in the biosynthesis ascospore wall component, chitosan; required for proper rigidity of the ascospore wall chitin deacetylase CDA1
YER042W	2.15938	4.27138e-17	1.9608e-15	350.783	504.913	115.695	79.452	No	MXR1	Methionine-S-sulfoxide reductase; involved in the response to oxidative stress; protects iron-sulfur clusters from oxidative inactivation along with MXR2; involved in the regulation of lifespan; reduced activity of human homolog implicated in Alzheimer disease peptide-methionine-S-sulfoxide reductase
YMR014W	2.14457	3.33776e-13	8.80503e-12	27.619	19.248	4.595	6.192	No	BUD22	Protein required for rRNA maturation and ribosomal subunit biogenesis; required for 18S rRNA maturation; also required for small ribosomal subunit biogenesis; cosediments with pre-ribosomal particles; mutation decreases efficiency of +1 Ty1 frameshifting and transposition, and affects budding pattern Bud22p
YER091C	2.14433	5.0603e-12	1.0767e-10	1170.99	2084.22	395.48	355.407	No	MET6	Cobalamin-independent methionine synthase; involved in methionine biosynthesis and regeneration; requires a minimum of two glutamates on the methyltetrahydrofolate substrate, similar to bacterial metE homologs 5-methyltetrahydropteroyltriglutamate-homocysteine S-methyltransferase
YFL067W	2.12876	7.04723e-07	5.6051e-06	7.957	12.809	2.819	2.068	No	YFL067W	hypothetical protein; down-regulated at low calcium levels; mCherry fusion protein localizes to the vacuole hypothetical protein
YMR011W	2.11113	2.12518e-22	2.09997e-20	366.655	327.436	65.011	98.74	No	HXT2	High-affinity glucose transporter of the major facilitator superfamily; expression is induced by low levels of glucose and repressed by high levels of glucose hexose transporter HXT2
YMR164C	2.10285	1.68302e-19	1.04383e-17	26.345	25.24	6.666	5.581	Yes	MSS11	Transcription factor; involved in regulation of invasive growth and starch degradation; controls the activation of FLO11 and STA2 in response to nutritional signals; forms a heterodimer with Flo8p that interacts with the Swi/Snf complex during transcriptional activation of FLO1, FLO11, and STA1 Mss11p
YDR253C	2.10095	0.00126151	0.0041575	198.956	491.57	93.515	70.681	Yes	MET32	Zinc-finger DNA-binding transcription factor; involved in transcriptional regulation of the methionine biosynthetic genes; targets strong transcriptional activator Met4p to promoters of sulfur metabolic genes; feedforward loop exists in the regulation of genes controlled by Met4p and Met32p; lack of such a loop for MET31 may account for the differential actions of Met32p and Met31p; MET32 has a p…
YER103W	2.09154	1.81984e-15	6.67274e-14	769.65	947.612	249.393	160.672	No	SSA4	Heat shock protein that is highly induced upon stress; plays a role in SRP-dependent cotranslational protein-membrane targeting and translocation; member of the HSP70 family; cytoplasmic protein that concentrates in nuclei upon starvation; SSA4 has a paralog, SSA3, that arose from the whole genome duplication Hsp70 family chaperone SSA4
YEL072W	2.09152	7.90228e-13	1.94389e-11	58.284	104.384	21.972	16.953	No	RMD6	Protein required for sporulation Rmd6p
YDR034C-D	2.06612	5.05815e-14	1.45985e-12	57.754	65.384	10.38	19.499	No	YDR034C-D	Retrotransposon TYA Gag and TYB Pol genes; transcribed/translated as one unit; polyprotein is processed to make a nucleocapsid-like protein (Gag), reverse transcriptase (RT), protease (PR), and integrase (IN); similar to retroviral genes gag-pol fusion protein
YJR078W	2.04229	1.61694e-29	4.0986e-27	53.74	47.436	11.936	13.029	No	BNA2	Tryptophan 2,3-dioxygenase or indoleamine 2,3-dioxygenase; required for de novo biosynthesis of NAD from tryptophan via kynurenine; interacts genetically with telomere capping gene CDC13; regulated by Hst1p and Aftp dioxygenase BNA2
YPR167C	2.02979	0.00112492	0.00374972	177.521	409.605	85.01	61.599	No	MET16	3'-phosphoadenylsulfate reductase; reduces 3'-phosphoadenylyl sulfate to adenosine-3',5'-bisphosphate and free sulfite using reduced thioredoxin as cosubstrate, involved in sulfate assimilation and methionine metabolism phosphoadenylyl-sulfate reductase (thioredoxin)
YER137C	2.02911	4.20244e-13	1.0889e-11	17.788	19.762	3.946	5.458	No	YER137C	hypothetical protein
YML128C	2.01806	1.03737e-20	7.95769e-19	1121.47	1274.01	339.525	262.636	No	MSC1	hypothetical protein; mutant is defective in directing meiotic recombination events to homologous chromatids; the authentic, non-tagged protein is detected in highly purified mitochondria and is phosphorylated Msc1p
YML130C	2.00356	9.65837e-29	1.94167e-26	519.359	396.767	115.316	117.272	No	ERO1	Thiol oxidase required for oxidative protein folding in the ER; essential for maintaining ER redox balance; feedback regulated via reduction and oxidation of regulatory bonds; reduced Pdi1p activates Ero1p by direct reduction of Ero1p regulatory bonds; depletion of thiol substrates and accumulation of oxidized Pdi1p results in inactivation of Ero1p by both Pdi1p-mediated oxidation and autonomous …
YLL062C	1.99104	0.0112818	0.027497	100.328	238.489	58.675	28.17	No	MHT1	S-methylmethionine-homocysteine methyltransferase; functions along with Sam4p in the conversion of S-adenosylmethionine (AdoMet) to methionine to control the methionine/AdoMet ratio S-adenosylmethionine-homocysteine S-methyltransferase MHT1
YNL277W	1.98001	0.000304424	0.00118954	168.321	313.172	75.929	48.458	No	MET2	L-homoserine-O-acetyltransferase; catalyzes the conversion of homoserine to O-acetyl homoserine which is the first step of the methionine biosynthetic pathway homoserine O-acetyltransferase
YML045W	1.97925	1.9142e-18	9.87589e-17	65.599	53.671	12.438	18.41	No	YML045W	Retrotransposon TYA Gag and TYB Pol genes; transcribed/translated as one unit; polyprotein is processed to make a nucleocapsid-like protein (Gag), reverse transcriptase (RT), protease (PR), and integrase (IN); similar to retroviral genes gag-pol fusion protein
YMR311C	1.97899	9.53501e-24	1.15811e-21	518.707	676.233	144.506	164.697	No	GLC8	Regulatory subunit of protein phosphatase 1 (Glc7p); involved in glycogen metabolism and chromosome segregation; proposed to regulate Glc7p activity via conformational alteration; ortholog of the mammalian protein phosphatase inhibitor 2; protein abundance increases in response to DNA replication stress Glc8p
YDR119W-A	1.97718	1.06791e-24	1.41498e-22	1120.64	1365.31	324.158	319.332	No	COX26	Stabilizes or regulates formation of respiratory chain supercomplexes composed of Complex III (ubiquinol-cytochrome c reductase) and Complex IV (cytochrome c oxidase) Cox26p
YLR327C	1.97653	8.88473e-11	1.52347e-09	4106.03	6413.87	1555.66	1167.82	No	TMA10	hypothetical protein that associates with ribosomes; protein abundance increases in response to DNA replication stress; TMA10 has a paralog, STF2, that arose from the whole genome duplication Tma10p
YDR077W	1.9601	3.71347e-17	1.71822e-15	6037.7	7471.96	1953.21	1583.18	No	SED1	Major stress-induced structural GPI-cell wall glycoprotein; associates with translating ribosomes, possible role in mitochondrial genome maintenance; ORF contains two distinct variable minisatellites; SED1 has a paralog, SPI1, that arose from the whole genome duplication Sed1p
YML015C	1.95639	1.41225e-31	4.57411e-29	62.002	64.987	15.429	17.898	No	TAF11	TFIID subunit (40 kDa); involved in RNA polymerase II transcription initiation, similar to histone H3 with atypical histone fold motif of Spt3-like transcription factors Taf11p
YLL061W	1.93821	0.00207233	0.00637946	106.624	208.313	53.761	29.949	No	MMP1	High-affinity S-methylmethionine permease; required for utilization of S-methylmethionine as a sulfur source; has similarity to S-adenosylmethionine permease Sam3p S-methylmethionine permease MMP1
YMR291W	1.93706	4.21295e-26	6.63824e-24	246.074	238.362	73.454	55.284	No	TDA1	Protein kinase of unknown cellular role; green fluorescent protein (GFP)-fusion protein localizes to the cytoplasm and nucleus; null mutant is sensitive to expression of the top1-T722A allele; not an essential gene; relocalizes from nucleus to cytoplasm upon DNA replication stress protein kinase TDA1
YGL125W	1.92859	2.99686e-36	1.74717e-33	167.608	189.695	49.251	46.402	No	MET13	Major isozyme of methylenetetrahydrofolate reductase; catalyzes the reduction of 5,10-methylenetetrahydrofolate to 5-methyltetrahydrofolate in the methionine biosynthesis pathway methylenetetrahydrofolate reductase (NAD(P)H) MET13
YDR210W-B	1.92507	6.06661e-12	1.28146e-10	41.403	42.83	7.818	14.785	No	YDR210W-B	Retrotransposon TYA Gag and TYB Pol genes; transcribed/translated as one unit; polyprotein is processed to make a nucleocapsid-like protein (Gag), reverse transcriptase (RT), protease (PR), and integrase (IN); similar to retroviral genes gag-pol fusion protein
YMR039C	1.91542	5.78778e-36	3.06752e-33	187.352	204.783	49.153	56.807	No	SUB1	Transcriptional regulator; facilitates elongation through factors that modify RNAP II; role in peroxide resistance involving Rad2p; role in nonhomologous end-joining (NHEJ) of ds breaks in plasmid DNA, but not chromosomal DNA; role in the hyperosmotic stress response through polymerase recruitment at RNAP II and RNAP III genes; negatively regulates sporulation; protein abundance increases in resp…
YML129C	1.91293	3.01882e-34	1.35383e-31	879.738	951.714	243.327	252.242	No	COX14	Mitochondrial cytochrome c oxidase (complex IV) assembly factor; also involved in translational regulation of Cox1p and prevention of Cox1p aggregation before assembly; associates with complex IV assembly intermediates and complex III/complex IV supercomplexes; located in the mitochondrial membrane Cox14p
YLR307C-A	1.90423	0.00155488	0.00498895	5.196	7.03	0.858	2.435	No	YLR307C-A	hypothetical protein
YLR423C	1.89638	1.06147e-18	5.6774e-17	73.953	64.735	15.269	22.656	No	ATG17	Scaffold protein responsible for phagophore assembly site organization; regulatory subunit of an autophagy-specific complex that includes Atg1p and Atg13p; stimulates Atg1p kinase activity; human ortholog RB1CC1/FIP200 interacts with p53, which inhibits autophagy in human cells protein kinase regulatory subunit ATG17
YMR044W	1.88624	2.75632e-29	5.95162e-27	117.617	130.168	30.918	37.442	No	IOC4	Member of a complex (Isw1b) with Isw1p and Ioc2p; interacts directly with H3K36me3 nucleosomes through its PWWP domain to recruit the Isw1b complex to open reading frames in a Set2p-dependent manner; Isw1b exhibits nucleosome-stimulated ATPase activity and acts within coding regions to coordinate transcription elongation with termination and processing Ioc4p
YMR191W	1.88493	5.46761e-34	2.27687e-31	329.755	366.726	88.65	103.554	No	SPG5	Protein required for proteasome assembly during quiescence; binds to base of the proteasome regulartory particle; required for survival at high temperature during stationary phase; not required for growth on nonfermentable carbon sources Spg5p
YMR204C	1.88215	3.48278e-18	1.7504e-16	37.766	48.958	11.225	12.784	No	INP1	Peripheral membrane protein of peroxisomes; involved in peroxisomal inheritance; recruitment to peroxisomes is mediated by interaction with Pex3p at the peroxisomal membrane Inp1p
YMR040W	1.87881	3.94558e-20	2.61395e-18	141.966	100.651	33.43	33.695	No	YET2	hypothetical protein that may interact with ribosomes; based on co-purification experiments; homolog of human BAP31 protein; YET2 has a paralog, YET1, that arose from the whole genome duplication Yet2p
YAL012W	1.87875	2.52596e-07	2.22452e-06	541.629	1155.42	280.225	190.132	No	CYS3	Cystathionine gamma-lyase; catalyzes one of the two reactions involved in the transsulfuration pathway that yields cysteine from homocysteine with the intermediary formation of cystathionine; protein abundance increases in response to DNA replication stress cystathionine gamma-lyase CYS3
YMR255W	1.87328	8.50595e-21	6.70131e-19	220.91	304.862	69.03	77.407	No	GFD1	Coiled-coiled hypothetical protein; identified as a high-copy suppressor of a dbp5 mutation; protein abundance increases in response to DNA replication stress Gfd1p
YOR372C	1.86985	4.40822e-25	6.11904e-23	41.474	43.596	12.022	11.673	Yes	NDD1	Transcriptional activator essential for nuclear division; localized to the nucleus; essential component of the mechanism that activates the expression of a set of late-S-phase-specific genes; turnover is tightly regulated during cell cycle and in response to DNA damage Ndd1p
YML062C	1.86407	1.96364e-17	9.15843e-16	66.505	82.082	17.132	24.457	No	MFT1	Subunit of the THO complex; THO is a nuclear complex comprised of Hpr1p, Mft1p, Rlr1p, and Thp2p, that is involved in transcription elongation and mitotic recombination; involved in telomere maintenance Mft1p
YBL100W-B	1.8556	2.0655e-11	3.93525e-10	25.795	26.966	5.441	9.338	No	YBL101W-B	Retrotransposon TYA Gag and TYB Pol genes; transcribed/translated as one unit; polyprotein is processed to make a nucleocapsid-like protein (Gag), reverse transcriptase (RT), protease (PR), and integrase (IN); similar to retroviral genes gag-pol fusion protein
YMR173W	1.8422	3.03116e-19	1.78502e-17	3046.56	3361.26	954.104	866.261	No	DDR48	DNA damage-responsive protein; expression is increased in response to heat-shock stress or treatments that produce DNA lesions; contains multiple repeats of the amino acid sequence NNNDSYGS; protein abundance increases in response to DNA replication stress DNA damage-responsive protein 48
YML018C	1.83688	5.54349e-13	1.40515e-11	96.141	146.526	39.607	29.649	No	YML018C	hypothetical protein; green fluorescent protein (GFP)-fusion protein localizes to the membrane of the vacuole; physical interaction with Atg27p suggests a possible role in autophagy; YML018C is not an essential gene; relative distribution to the vacuolar membrane decreases upon DNA replication stress; YML018C has a paralog, THI74, that arose from the whole genome duplication hypothetical protein
YMR041C	1.83467	3.01364e-26	5.01986e-24	120.174	146.051	39.227	36.797	No	ARA2	NAD-dependent arabinose dehydrogenase; involved in biosynthesis of dehydro-D-arabinono-1,4-lactone; similar to plant L-galactose dehydrogenase D-arabinose 1-dehydrogenase (NAD(P)(+)) ARA2
YDR258C	1.83006	1.92345e-16	7.95297e-15	548.801	743.935	203.855	166.598	No	HSP78	Oligomeric mitochondrial matrix chaperone; cooperates with Ssc1p in mitochondrial thermotolerance after heat shock; able to prevent the aggregation of misfolded proteins as well as resolubilize protein aggregates chaperone ATPase HSP78
YMR114C	1.81954	1.90984e-18	9.87589e-17	134.987	189.453	44.778	48.992	No	YMR114C	hypothetical protein; may interact with ribosomes, based on co-purification experiments; green fluorescent protein (GFP)-fusion protein localizes to the nucleus and cytoplasm; YMR114C is not an essential gene putative peptide hydrolase
YMR197C	1.81946	2.10792e-19	1.28012e-17	217.263	291.209	66.138	80.853	No	VTI1	Protein involved in cis-Golgi membrane traffic; v-SNARE that interacts with two t-SNARES, Sed5p and Pep12p; required for multiple vacuolar sorting pathways; human homolog VTI1A can complement yeast null mutant v-SNARE protein VTI1
YMR196W	1.8141	1.08501e-16	4.68563e-15	199.811	290.385	75.978	66.112	No	YMR196W	hypothetical protein; green fluorescent protein (GFP)-fusion protein localizes to the cytoplasm; YMR196W is not an essential gene hypothetical protein
YMR043W	1.80205	4.7819e-25	6.48337e-23	286.824	302.7	96.517	75.662	Yes	MCM1	Transcription factor; involved in cell-type-specific transcription and pheromone response; plays a central role in the formation of both repressor and activator complexes; relocalizes to the cytosol in response to hypoxia transcription factor MCM1
YPR168W	1.79304	3.43992e-10	5.23623e-09	35.076	62.398	14.228	14.552	No	NUT2	Subunit of the RNA polymerase II mediator complex; conserved from yeast to human; associates with core polymerase subunits to form the RNA polymerase II holoenzyme; required for transcriptional activation and has a role in basal transcription; protein abundance increases in response to DNA replication stress mediator complex subunit NUT2
YFL058W	1.79253	0.0104208	0.0257103	5.175	2.793	1.066	1.234	No	THI5	Protein involved in synthesis of the thiamine precursor HMP; member of a subtelomeric gene family including THI5, THI11, THI12, and THI13; hydroxymethylpyrimidine is also known as HMP 4-amino-5-hydroxymethyl-2-methylpyrimidine phosphate synthase
YMR029C	1.78431	2.74857e-29	5.95162e-27	189.909	223.585	58.638	63.744	No	FAR8	Protein involved in recovery from arrest in response to pheromone; acts in a cell cycle arrest recovery pathway independent from Far1p; interacts with Far3p, Far7p, Far9p, Far10p, and Far11p Far8p
YMR271C	1.78412	2.88726e-33	1.12218e-30	830.165	851.684	243.584	253.954	No	URA10	Minor orotate phosphoribosyltransferase (OPRTase) isozyme; catalyzes the fifth enzymatic step in the de novo biosynthesis of pyrimidines, converting orotate into orotidine-5'-phosphate; URA10 has a paralog, URA5, that arose from the whole genome duplication orotate phosphoribosyltransferase URA10
YMR181C	1.78386	1.75172e-29	4.25522e-27	713.057	798.653	223.009	224.428	No	YMR181C	hypothetical protein; mRNA transcribed as part of a bicistronic transcript with a predicted transcriptional repressor RGM1/YMR182C; mRNA is destroyed by nonsense-mediated decay (NMD); not an essential gene; YMR181C has a paralog, YPL229W, that arose from the whole genome duplication hypothetical protein
YGR142W	1.78228	2.22849e-09	2.92614e-08	841.514	1369.49	378.348	276.588	No	BTN2	v-SNARE binding protein; facilitates specific protein retrieval from a late endosome to the Golgi; modulates arginine uptake, possible role in mediating pH homeostasis between the vacuole and plasma membrane H(+)-ATPase; contributes to prion curing; preferentially expressed after severe ethanol stress Btn2p
YMR214W	1.77475	1.62383e-31	4.98261e-29	243.282	220.753	63.454	74.694	No	SCJ1	One of several homologs of bacterial chaperone DnaJ; located in the ER lumen where it cooperates with Kar2p to mediate maturation of proteins Scj1p
YNL332W	1.75432	6.73467e-05	0.000322622	7.814	6.555	2.439	1.957	No	THI12	Protein involved in synthesis of the thiamine precursor HMP; member of a subtelomeric gene family including THI5, THI11, THI12, and THI13; hydroxymethylpyrimidine is also known as HMP 4-amino-5-hydroxymethyl-2-methylpyrimidine phosphate synthase
YGR065C	1.75179	1.17386e-26	2.07382e-24	111.586	131.011	37.34	36.108	No	VHT1	High-affinity plasma membrane H+-biotin (vitamin H) symporter; mutation results in fatty acid auxotrophy; 12 transmembrane domain containing major facilitator subfamily member; mRNA levels negatively regulated by iron deprivation and biotin Vht1p
YMR159C	1.73797	8.31049e-13	2.01876e-11	46.843	69.728	15.882	19.833	No	ATG16	Conserved protein involved in autophagy; interacts with Atg12p-Atg5p conjugates to form Atg12p-Atg5p-Atg16p multimers, which binds to membranes and localizes to the pre-autophagosomal structure and are required for autophagy; relocalizes from nucleus to cytoplasmic foci upon DNA replication stress Atg16p
YML120C	1.72226	1.99086e-41	1.6581e-38	314.83	321.753	96.689	99.863	No	NDI1	NADH:ubiquinone oxidoreductase; transfers electrons from NADH to ubiquinone in respiratory chain but does not pump protons, in contrast to higher eukaryotic multisubunit respiratory complex I; upon apoptotic stress, is activated in mitochondria by N-terminal cleavage, then translocates to cytoplasm to induce apoptosis; homolog of human AIFM2; yeast NDI1 complements several phenotypes of human cel…
RUF5-1	1.71877	2.2629e-20	1.55208e-18	4461.99	4663.06	1435.89	1388.07	No	RUF5-1	- -
RUF5-2	1.71877	2.2629e-20	1.55208e-18	4461.99	4663.06	1435.89	1388.07	No	RUF5-2	- -
YML003W	1.69941	1.84648e-09	2.46338e-08	24.165	36.837	8.211	11.039	No	YML003W	hypothetical protein
YMR183C	1.68477	3.88037e-33	1.41391e-30	157.726	149.105	49.827	47.369	No	SSO2	Plasma membrane t-SNARE; involved in fusion of secretory vesicles at the plasma membrane; syntaxin homolog that is functionally redundant with Sso1p; SSO2 has a paralog, SSO1, that arose from the whole genome duplication syntaxin
YMR002W	1.67441	5.71991e-18	2.77892e-16	804.818	982.85	264.785	306.315	No	MIX17	Mitochondrial intermembrane space protein; required for normal oxygen consumption; contains twin cysteine-x9-cysteine motifs; protein abundance increases in response to DNA replication stress Mix17p
YMR244W	1.66864	1.35408e-08	1.52695e-07	13.937	13.42	4.657	4.113	No	YMR244W	hypothetical protein; SWAT-GFP fusion protein localizes to the endoplasmic reticulum and vacuole, while mCherry fusion localizes to just the vacuole hypothetical protein
YMR294W	1.66444	1.64744e-17	7.80862e-16	41.984	51.673	14.436	15.675	No	JNM1	Component of the yeast dynactin complex; consisting of Nip100p, Jnm1p, and Arp1p; required for proper nuclear migration and spindle partitioning during mitotic anaphase B Jnm1p
YOR388C	1.66441	0.0059875	0.0159612	105.738	230.285	63.957	44.056	No	FDH1	NAD(+)-dependent formate dehydrogenase; may protect cells from exogenous formate formate dehydrogenase (NAD+)
YML034W	1.66191	1.07537e-22	1.11954e-20	80.432	88.55	24.644	29.793	No	SRC1	Inner nuclear membrane protein; highly enriched at telomeres and subtelomeric regions; functions in regulation of subtelomeric genes and is linked to TREX (transcription export) factors; SRC1 produces 2 splice variant proteins with different functions; alternative splicing of SRC1 pre-mRNA is promoted by Hub1p; mutant has aneuploidy tolerance; SEC1 has a paralog, HEH2, that arose from the whole g…
YMR227C	1.66088	1.75055e-15	6.47105e-14	54.637	59.082	15.024	21.6	No	TAF7	TFIID subunit (67 kDa); involved in RNA polymerase II transcription initiation Taf7p
YMR115W	1.65853	7.1334e-27	1.29962e-24	70.54	74.839	22.671	24.313	No	MGR3	Subunit of the mitochondrial (mt) i-AAA protease supercomplex; i-AAA degrades misfolded mitochondrial proteins; forms a subcomplex with Mgr1p that binds to substrates to facilitate proteolysis; required for growth of cells lacking mtDNA Mgr3p
YMR169C	1.65536	1.29872e-11	2.57534e-10	526.297	397.339	177.863	120.174	No	ALD3	Cytoplasmic aldehyde dehydrogenase; involved in beta-alanine synthesis; uses NAD+ as the preferred coenzyme; very similar to Ald2p; expression is induced by stress and repressed by glucose aldehyde dehydrogenase (NAD(+)) ALD3
YBR279W	1.65201	7.81356e-22	7.11766e-20	92.341	106.643	29.57	34.985	No	PAF1	Component of the Paf1p complex involved in transcription elongation; binds to and modulates the activity of RNA polymerases I and II; required for expression of a subset of genes, including cell cycle-regulated genes; involved in SER3 repression by helping to maintain SRG1 transcription-dependent nucleosome occupancy; homolog of human PD2/hPAF1 Paf1p
YOR192C-B	1.64928	3.5674e-13	9.36844e-12	79.25	86.416	20.894	32.895	No	YOR192C-B	Retrotransposon TYA Gag and TYB Pol genes; transcribed/translated as one unit; polyprotein is processed to make a nucleocapsid-like protein (Gag), reverse transcriptase (RT), protease (PR), and integrase (IN); similar to retroviral genes gag-pol fusion protein
YIL074C	1.6475	0.011683	0.0283328	216.02	491.57	140.143	90.013	No	SER33	3-phosphoglycerate dehydrogenase and alpha-ketoglutarate reductase; 3PG dehydrogenase that catalyzes the first step in serine and glycine biosynthesis; also functions as an alpha-ketoglutarate reductase, converting alpha-ketoglutarate to D-2-hydroxyglutarate (D-2HG); localizes to the cytoplasm; SER33 has a paralog, SER3, that arose from the whole genome duplication phosphoglycerate dehydrogenase …
YMR086W	1.64586	3.43742e-21	2.94708e-19	97.629	118.822	36.421	34.118	No	SEG1	Component of eisosome required for proper eisosome assembly; precedes Pil1p/Lsp1p during eisosome formation, controls eisosome length and shape; diffusely distributed, forms heterogeneous patches at plasma membrane in small buds, also found in medium and large buds; expression repressed by cAMP; similar to A. gossypii SEG gene and to S. pombe Sle1p, important for generating eisosomes; SEG1 has a …
YIL046W	1.64478	3.80039e-08	4.02841e-07	96.223	182.665	50.526	40.465	No	MET30	F-box protein containing five copies of the WD40 motif; controls cell cycle function, sulfur metabolism, and methionine biosynthesis as part of the ubiquitin ligase complex; interacts with and regulates Met4p, localizes within the nucleus; dissociation of Met30p from SCF complex in response to cadmium stress is regulated by Cdc48p ubiquitin-binding SDF ubiquitin ligase complex subunit MET30
YML072C	1.64019	3.0996e-29	6.45382e-27	126.653	137.838	43.467	43.011	No	TCB3	Cortical ER protein involved in ER-plasma membrane tethering; one of 6 proteins (Ist2p, Scs2p, Scs22p, Tcb1p, Tcb2p, Tcb3p) that connect ER to the plasma membrane (PM) and regulate PM phosphatidylinositol-4-phosphate (PI4P) levels by controlling access of Sac1p phosphatase to its substrate PI4P in the PM; localized to the bud via specific mRNA transport; non-tagged protein detected in a phosphory…
YML131W	1.6343	1.07321e-10	1.82004e-09	149.902	252.209	67.143	65.045	No	YML131W	hypothetical protein; similar to medium chain dehydrogenase/reductases; expression induced by stresses including osmotic shock, DNA damaging agents, and other chemicals; GFP-fusion protein localizes to the cytoplasm; protein abundance increases in response to DNA replication stress hypothetical protein
YGL183C	1.6324	2.64829e-06	1.84243e-05	10.554	15.883	3.97	4.78	No	MND1	Protein required for recombination and meiotic nuclear division; forms a complex with Hop2p, which is involved in chromosome pairing and repair of meiotic double-strand breaks Mnd1p
YJL034W	1.63089	1.36646e-15	5.17301e-14	1759.39	1434.82	544.176	505.64	No	KAR2	ATPase involved in protein import into the ER; also acts as a chaperone to mediate protein folding in the ER and may play a role in ER export of soluble proteins; regulates the unfolded protein response via interaction with Ire1p Hsp70 family ATPase KAR2
YML100W	1.6271	2.52904e-12	5.58497e-11	905.564	750.053	317.945	227.129	No	TSL1	Large subunit of trehalose 6-phosphate synthase/phosphatase complex; Tps1p-Tps2p complex converts uridine-5'-diphosphoglucose and glucose 6-phosphate to trehalose; contributes to survival to acute lethal heat stress; mutant has aneuploidy tolerance; protein abundance increases in response to DNA replication stress; TSL1 has a paralog, TPS3, that arose from the whole genome duplication trehalose 6…
YMR233W	1.62503	1.02165e-21	9.02454e-20	62.705	57.356	18.149	21.489	No	TRI1	Non-essential sumoylated hypothetical protein; similar to components of human SWI/SNF complex including SMRD3; green fluorescent protein (GFP)-fusion protein localizes to the cytoplasm, nucleus and nucleolus; TRI1 has a paralog, UAF30, that arose from the whole genome duplication Tri1p
YCL048W-A	1.62252	7.95925e-07	6.22852e-06	25.337	50.432	11.152	13.996	No	YCL048W-A	hypothetical protein; SWAT-GFP and mCherry fusion proteins localize to the cell periphery and vacuole; YCL048W-A has a paralog, YDR524C-B, that arose from the whole genome duplication hypothetical protein
YMR009W	1.61805	7.44309e-08	7.50748e-07	370.883	719.47	182.618	179.893	No	ADI1	Acireductone dioxygenease involved in methionine salvage pathway; transcribed as polycistronic mRNA with YMR010W and regulated post-transcriptionally by RNase III (Rnt1p) cleavage; ADI1 mRNA is induced in heat shock conditions; human ortholog ADI1 can complement yeast adi1 mutant acireductone dioxygenase (Ni2+-requiring)
YDR342C	1.60855	7.81746e-19	4.25942e-17	2092.57	2119.76	697.395	709.791	No	HXT7	High-affinity glucose transporter; member of the major facilitator superfamily, nearly identical to Hxt6p, expressed at high basal levels relative to other HXTs, expression repressed by high glucose levels; HXT7 has a paralog, HXT4, that arose from the whole genome duplication hexose transporter HXT7
YJL144W	1.60598	4.30269e-11	7.73382e-10	533.061	821.905	232.555	221.415	No	YJL144W	Cytoplasmic hydrophilin essential in desiccation-rehydration process; expression induced by osmotic stress, starvation and during stationary phase; protein abundance increases in response to DNA replication stress hypothetical protein
YML030W	1.60565	1.39325e-22	1.42503e-20	246.471	238.304	71.469	90.825	No	RCF1	Cytochrome c oxidase subunit; required for assembly of the Complex III-Complex IV supercomplex, and for assembly of Cox13p and Rcf2p into cytochrome c oxidase; similar to Rcf2p, and either Rcf1p or Rcf2p is required for late-stage assembly of the Cox12p and Cox13p subunits and for cytochrome c oxidase activity; required for growth under hypoxic conditions; member of the hypoxia induced gene famil…
YMR004W	1.60215	1.98863e-24	2.57638e-22	104.363	119.104	36.617	38.431	No	MVP1	Protein required for sorting proteins to the vacuole; Mvp1p and Vps1p act in concert to promote membrane traffic to the vacuole; participates in transcription initiation and/or early elongation of specific genes; interacts with 'foot domain' of RNA polymerase II; deletion results in abnormal CTD-Ser5 phosphorylation of RNA polymerase II at specific promoter regions; protein abundance increases in…
YML093W	1.59614	1.05144e-06	8.01293e-06	28.923	16.901	6.336	8.982	No	UTP14	Subunit of U3-containing Small Subunit (SSU) processome complex; involved in production of 18S rRNA and assembly of small ribosomal subunit Utp14p
YMR268C	1.59364	3.21217e-10	4.9152e-09	19.601	18.976	5.662	7.326	No	PRP24	Splicing factor that reanneals snRNPs during spliceosome recycling; reanneals U4 and U6 snRNPs U6 snRNP complex subunit PRP24
YML004C	1.58792	2.23174e-20	1.55208e-18	1290.25	1359.68	461.875	436.093	No	GLO1	Monomeric glyoxalase I; catalyzes the detoxification of methylglyoxal (a by-product of glycolysis) via condensation with glutathione to produce S-D-lactoylglutathione; expression regulated by methylglyoxal levels and osmotic stress lactoylglutathione lyase GLO1
YML097C	1.5835	4.27795e-15	1.49344e-13	56.654	50.345	15.294	21.066	No	VPS9	Guanine nucleotide exchange factor (GEF) and ubiquitin receptor; involved in vesicle-mediated vacuolar transport, including Golgi-endosome trafficking and sorting through the multivesicular body (MVB); stimulates the intrinsic guanine nucleotide exchange activity of Rab family members (Vps21p/Ypt52p/Ypt53p); partially redundant with GEF MUK1; required for localization of the CORVET complex to end…
YOR183W	1.57862	0.000279391	0.00110431	6.255	7.457	2.426	2.279	No	FYV12	hypothetical protein; required for survival upon exposure to K1 killer toxin Fyv12p
YOL163W	1.57727	3.59226e-10	5.45387e-09	43.542	66.626	20.882	16.842	No	YOL163W	hypothetical protein; member of the Dal5p subfamily of the major facilitator family hypothetical protein
YMR072W	1.57689	6.94267e-21	5.54463e-19	586.363	695.539	219.406	218.569	No	ABF2	Mitochondrial DNA-binding protein; involved in mitochondrial DNA replication and recombination, member of HMG1 DNA-binding protein family; activity may be regulated by protein kinase A phosphorylation; ABF2 has a paralog, IXR1, that arose from the whole genome duplication; human homolog TFAM can complement yeast abf2 mutant, rescuing the loss-of-mitochondrial DNA phenotype in a yeast abf2 strain …
YML009C	1.57643	2.2976e-19	1.36683e-17	929.037	784.67	278.093	307.159	No	MRPL39	Mitochondrial ribosomal protein of the large subunit mitochondrial 54S ribosomal protein YmL39
YLL026W	1.57427	1.15479e-10	1.9346e-09	1259.18	1659.16	553.698	444.709	No	HSP104	Disaggregase; heat shock protein that cooperates with Ydj1p (Hsp40) and Ssa1p (Hsp70) to refold and reactivate previously denatured, aggregated proteins; responsive to stresses including: heat, ethanol, and sodium arsenite; involved in [PSI+] propagation; protein becomes more abundant and forms cytoplasmic foci in response to DNA replication stress; potentiated Hsp104p variants decrease TDP-43 pr…
YOL019W	1.57403	3.83738e-15	1.35587e-13	36.757	44.701	13.112	14.774	No	YOL019W	hypothetical protein; green fluorescent protein (GFP)-fusion protein localizes to the cell periphery and vacuole; YOL019W has a paralog, DCV1, that arose from the whole genome duplication hypothetical protein
YMR140W	1.57181	7.84961e-14	2.20015e-12	95.662	135.656	39.815	39.554	No	SIP5	hypothetical protein; interacts with both the Reg1p/Glc7p phosphatase and the Snf1p kinase; forms cytoplasmic foci upon DNA replication stress Sip5p
YML095C	1.56862	1.96979e-11	3.7652e-10	53.526	63.086	15.698	24.39	No	RAD10	Single-stranded DNA endonuclease (with Rad1p); cleaves single-stranded DNA during nucleotide excision repair and double-strand break repair; subunit of Nucleotide Excision Repair Factor 1 (NEF1); homolog of human ERCC1 protein Rad10p
YMR137C	1.56544	1.56637e-11	3.03387e-10	20.905	22.952	7.095	8.015	No	PSO2	Nuclease required for DNA single- and double-strand break repair; acts at a post-incision step in repair of breaks that result from interstrand cross-links produced by a variety of mono- and bi-functional psoralen derivatives; induced by UV-irradiation; forms nuclear foci upon DNA replication stress Pso2p
YOL109W	1.55486	1.51002e-14	4.81063e-13	923.8	1069.59	380.137	310.817	No	ZEO1	Peripheral membrane protein of the plasma membrane; interacts with Mid2p; regulates the cell integrity pathway mediated by Pkc1p and Slt2p; the authentic protein is detected in a phosphorylated state in highly purified mitochondria Zeo1p
YNL015W	1.55354	1.73521e-16	7.22592e-15	1034.48	1234.44	378.531	409.424	No	PBI2	Cytosolic inhibitor of vacuolar proteinase B (PRB1); required for efficient vacuole inheritance; with thioredoxin forms protein complex LMA1, which assists in priming SNARE molecules and promotes vacuole fusion; protein abundance increases in response to DNA replication stress Pbi2p
YMR201C	1.55354	3.4497e-22	3.24383e-20	54.637	55.707	18.382	19.855	No	RAD14	Protein that recognizes and binds damaged DNA during NER; subunit of Nucleotide Excision Repair Factor 1 (NEF1); contains zinc finger motif; homolog of human XPA protein; NER stands for nucleotide excision repair Rad14p
YOR177C	1.55193	5.04217e-05	0.000249117	7.865	9.988	2.806	3.391	No	MPC54	Component of the meiotic outer plaque; a membrane-organizing center which is assembled on the cytoplasmic face of the spindle pole body during meiosis II and triggers the formation of the prospore membrane; potential Cdc28p substrate Mpc54p
YMR067C	1.5496	4.1911e-23	4.44257e-21	87.777	79.27	30.293	27.792	No	UBX4	UBX domain-containing protein that interacts with Cdc48p; involved in degradation of polyubiquitinated proteins via the ERAD (ER-associated degradation) pathway; modulates the Cdc48p-Nplp-Ufd1p AAA ATPase complex during its role in delivery of misfolded proteins to the proteasome; protein abundance increases in response to DNA replication stress Ubx4p
YML091C	1.54467	5.94594e-17	2.66652e-15	56.644	61.321	17.99	23.223	No	RPM2	Protein subunit of mitochondrial RNase P; has roles in nuclear transcription, cytoplasmic and mitochondrial RNA processing, and mitochondrial translation; distributed to mitochondria, cytoplasmic processing bodies, and the nucleus ribonuclease P
YKL201C	1.54224	0.00616678	0.0163643	38.071	84.254	21.115	21.834	No	MNN4	Putative positive regulator of mannosylphosphate transferase Mnn6p; involved in mannosylphosphorylation of N-linked oligosaccharides; expression increases in late-logarithmic and stationary growth phases; coding sequence contains length polymorphisms in different strains; MNN4 has a paralog, YJR061W, that arose from the whole genome duplication Mnn4p
YDL173W	1.54159	2.66588e-11	4.99745e-10	90.436	97.82	40.06	25.78	No	PAR32	hypothetical protein; hyperphosphorylated upon rapamycin treatment in a Tap42p-dependent manner; green fluorescent protein (GFP)-fusion protein localizes to the cytoplasm; PAR32 is not an essential gene Par32p
YML071C	1.54126	7.34372e-17	3.24348e-15	51.692	60.662	17.977	21.411	No	COG8	Component of the conserved oligomeric Golgi complex; a cytosolic tethering complex (Cog1p through Cog8p) that functions in protein trafficking to mediate fusion of transport vesicles to Golgi compartments Golgi transport complex subunit COG8
YMR187C	1.54119	3.1681e-18	1.60609e-16	43.94	39.727	14.362	14.83	No	YMR187C	hypothetical protein; YMR187C is not an essential gene hypothetical protein
YMR025W	1.53771	6.69221e-10	9.65732e-09	28.067	32.891	8.529	12.884	No	CSI1	Subunit of the Cop9 signalosome; which is required for deneddylation, or removal of the ubiquitin-like protein Rub1p from Cdc53p (cullin); involved in adaptation to pheromone signaling; functional equivalent of canonical Csn6 subunit of the COP9 signalosome Csi1p
YGR155W	1.53654	1.17823e-07	1.12978e-06	527.458	877.438	283.865	209.653	No	CYS4	Cystathionine beta-synthase; catalyzes synthesis of cystathionine from serine and homocysteine, the first committed step in cysteine biosynthesis; responsible for hydrogen sulfide generation; advances passage through START by promoting cell growth which requires catalytic activity, and reducing critical cell size independent of catalytic activity; mutations in human ortholog CBS cause homocystinu…
YML025C	1.53629	6.0526e-28	1.13828e-25	134.671	132.815	48.259	45.679	No	YML6	Mitochondrial ribosomal protein of the large subunit; has similarity to E. coli L4 ribosomal protein and human mitoribosomal MRP-L4 protein; essential for viability, unlike most other mitoribosomal proteins mitochondrial 54S ribosomal protein YmL6
YOR344C	1.53367	1.7243e-16	7.22592e-15	96.447	95.085	28.565	38.809	Yes	TYE7	Serine-rich protein that contains a bHLH DNA binding motif; binds E-boxes of glycolytic genes and contributes to their activation; may function as a transcriptional activator in Ty1-mediated gene expression; bHLH stands for basic-helix-loop-helix Tye7p
YML032C	1.52536	1.4245e-20	1.05124e-18	59.303	66.761	22.524	22.134	No	RAD52	Protein that stimulates strand exchange; stimulates strand exchange by facilitating Rad51p binding to single-stranded DNA; anneals complementary single-stranded DNA; involved in the repair of double-strand breaks in DNA during vegetative growth and meiosis and UV induced sister chromatid recombination recombinase RAD52
YJR022W	1.52291	0.00971952	0.0242572	69.959	71.338	14.656	35.541	No	LSM8	Lsm (Like Sm) protein; forms heteroheptameric complex (with Lsm2p, Lsm3p, Lsm4p, Lsm5p, Lsm6p, and Lsm7p) that is part of spliceosomal U6 snRNP and is also implicated in processing of pre-tRNA, pre-snoRNA, and pre-rRNA U4/U6-U5 snRNP complex subunit LSM8
YMR097C	1.52279	1.75373e-15	6.47105e-14	93.605	107.613	30.771	40.654	No	MTG1	Putative GTPase peripheral to the mitochondrial inner membrane; essential for respiratory competence, likely functions in assembly of the large ribosomal subunit, has homologs in plants and animals putative GTPase MTG1
YJL212C	1.49427	3.61155e-07	3.09183e-06	93.401	88.181	43.528	22.011	No	OPT1	Proton-coupled oligopeptide transporter of the plasma membrane; also transports glutathione and phytochelatin; member of the OPT family oligopeptide transporter OPT1
YNL194C	1.48668	1.5148e-15	5.66107e-14	273.56	300.731	118.637	90.102	No	YNL194C	Integral membrane protein; required for sporulation and plasma membrane sphingolipid content; similar to SUR7; GFP-fusion protein is induced in response to the DNA-damaging agent MMS; GFP-fusion protein is more abundant at MCCs (membrane compartment occupied by Can1) in the presence of glycerol and oleate; YNL194C has a paralog, FMP45, that arose from the whole genome duplication hypothetical pro…
YDR502C	1.48387	2.00181e-07	1.81355e-06	1294.51	2086.34	636.662	595.92	No	SAM2	S-adenosylmethionine synthetase; catalyzes transfer of the adenosyl group of ATP to the sulfur atom of methionine; comparative analysis suggests that a mitochondrially targeted form may result from translation starting at a non-canonical codon upstream of the annotated start codon methionine adenosyltransferase SAM2
YJL153C	1.47842	5.71395e-08	5.84427e-07	2280.13	1463.73	700.741	666.079	No	INO1	Inositol-3-phosphate synthase; involved in synthesis of inositol phosphates and inositol-containing phospholipids; transcription is coregulated with other phospholipid biosynthetic genes by Ino2p and Ino4p, which bind the UASINO DNA element inositol-3-phosphate synthase INO1
YMR101C	1.4774	0.0177245	0.040083	3.494	4.276	1.434	1.412	No	SRT1	Forms the dehydrodolichyl diphosphate syntase (DDS) complex with NUS1; involved in synthesis of long-chain dolichols (19-22 isoprene units; as opposed to Rer2p which synthesizes shorter-chain dolichols); localizes to lipid bodies; transcription is induced during stationary phase ditrans,polycis-polyprenyl diphosphate synthase
YMR295C	1.47608	3.2804e-22	3.13521e-20	822.809	856.115	312.455	302.357	No	YMR295C	hypothetical protein that associates with ribosomes; green fluorescent protein (GFP)-fusion protein localizes to the cell periphery and bud; not an essential gene; protein abundance increases in response to DNA replication stress; YMR295C has a paralog, YGR273C, that arose from the whole genome duplication hypothetical protein
YPL265W	1.47057	3.57317e-09	4.47991e-08	146.122	234.823	63.148	77.129	No	DIP5	Dicarboxylic amino acid permease; mediates high-affinity and high-capacity transport of L-glutamate and L-aspartate; also a transporter for Gln, Asn, Ser, Ala, and Gly; relocalizes from plasma membrane to vacuole upon DNA replication stress Dip5p
YMR256C	1.46929	3.51919e-09	4.43129e-08	1181.2	1710.82	541.946	522.938	No	COX7	Subunit VII of cytochrome c oxidase (Complex IV); Complex IV is the terminal member of the mitochondrial inner membrane electron transport chain cytochrome c oxidase subunit VII
YML076C	1.46876	5.27004e-15	1.80731e-13	43.512	49.065	18.517	15.619	Yes	WAR1	Homodimeric Zn2Cys6 zinc finger transcription factor; binds to a weak acid response element to induce transcription of PDR12 and FUN34, encoding an acid transporter and a putative ammonia transporter, respectively War1p
YPL106C	1.46646	1.25263e-16	5.36973e-15	691.582	654.115	271.806	223.905	No	SSE1	ATPase component of heat shock protein Hsp90 chaperone complex; serves as nucleotide exchange factor to load ATP onto the SSA class of cytosolic Hsp70s; plays a role in prion propagation and determining prion variants; binds unfolded proteins; member of Hsp110 subclass of HSP70 proteins; deletion results in spindle elongation in S phase; SSE1 has a paralog, SSE2, that arose from the whole genome …
YDR171W	1.46522	1.26126e-08	1.43057e-07	2101.13	2887.32	983.393	857.734	No	HSP42	Small heat shock protein (sHSP) with chaperone activity; forms barrel-shaped oligomers that suppress unfolded protein aggregation; involved in cytoskeleton reorganization after heat shock; protein abundance increases and forms cytoplasmic foci in response to DNA replication stress heat shock protein HSP42
YML055W	1.46438	4.369e-20	2.86194e-18	275.19	230.149	87.289	99.218	No	SPC2	Subunit of signal peptidase complex; complex catalyzes cleavage of N-terminal signal sequences of proteins targeted to the secretory pathway; homologous to mammalian SPC25; other members of the complex are Spc1p, Spc1p, and Sec11p signal peptidase complex subunit SPC2
YHR112C	1.46145	2.15905e-06	1.51855e-05	203.102	401.295	125.952	97.906	No	YHR112C	hypothetical protein; localizes to the cytoplasm and nucleus; overexpression affects protein trafficking through the endocytic pathway putative cystathionine beta-lyase
YMR226C	1.45922	2.09065e-11	3.97019e-10	898.983	1214.69	383.715	400.119	No	YMR226C	NADP(+)-dependent serine dehydrogenase and carbonyl reductase; acts on serine, L-allo-threonine, and other 3-hydroxy acids; green fluorescent protein fusion protein localizes to the cytoplasm and nucleus; may interact with ribosomes, based on co-purification experiments oxidoreductase
YMR252C	1.45913	7.79421e-26	1.1958e-23	256.587	236.937	86.468	96.372	No	YMR252C	hypothetical protein; green fluorescent protein (GFP)-fusion protein localizes to mitochondria; YMR252C is not an essential gene hypothetical protein
YGR161C	1.45255	1.31322e-08	1.48662e-07	472.159	722.418	247.898	196.913	No	RTS3	Putative component of the protein phosphatase type 2A complex Rts3p
YMR178W	1.44818	9.07272e-21	7.05253e-19	231.974	274.667	92.167	97.162	No	YMR178W	hypothetical protein; green fluorescent protein (GFP)-fusion protein localizes to both the cytoplasm and nucleus; YMR178W is not an essential gene; protein abundance increases in response to DNA replication stress hypothetical protein
YMR090W	1.44757	4.93304e-17	2.24685e-15	566.151	507.289	218.119	182.361	No	YMR090W	hypothetical protein; similar to DTDP-glucose 4,6-dehydratases; GFP-fusion protein localizes to the cytoplasm; up-regulated in response to the fungicide mancozeb; not essential for viability hypothetical protein
YPL230W	1.44656	1.17392e-17	5.60979e-16	173.924	175.897	72.596	58.086	Yes	USV1	Putative transcription factor containing a C2H2 zinc finger; mutation affects transcriptional regulation of genes involved in growth on non-fermentable carbon sources, response to salt stress and cell wall biosynthesis; USV1 has a paralog, RGM1, that arose from the whole genome duplication Usv1p
YMR028W	1.44519	1.14941e-14	3.72282e-13	62.766	72.279	22.218	28.415	No	TAP42	Essential protein involved in the TOR signaling pathway; physically associates with the protein phosphatase 2A and the SIT4 protein phosphatase catalytic subunits Tap42p
YGR009C	1.43807	2.78866e-15	9.97416e-14	56.012	69.137	24.117	23.012	No	SEC9	t-SNARE protein required for secretory vesicle-plasma membrane fusion; similar to but not functionally redundant with Spo20p; interacts non-exocyst bound Sec6p; SNAP-25 homolog Sec9p
YGR008C	1.438	1.62496e-10	2.64623e-09	5798.77	6719.83	2055.82	2656.88	No	STF2	Protein involved in resistance to desiccation stress; Stf2p exhibits antioxidant properties, and its overexpression prevents ROS accumulation and apoptosis; binds to F0 sector of mitochondrial F1F0 ATPase in vitro and may modulate the inhibitory action of Inh1p and Stf1p; protein abundance increases in response to DNA replication stress; STF2 has a paralog, TMA10, that arose from the whole genome…
YJL060W	1.43528	1.8111e-06	1.30033e-05	212.984	377.431	132.962	89.502	No	BNA3	Kynurenine aminotransferase; catalyzes formation of kynurenic acid from kynurenine; potential Cdc28p substrate kynurenine--oxoglutarate transaminase
YFR053C	1.4348	2.49276e-11	4.70316e-10	3488.64	3836.58	1491.86	1267.38	No	HXK1	Hexokinase isoenzyme 1; a cytosolic protein that catalyzes phosphorylation of glucose during glucose metabolism; expression is highest during growth on non-glucose carbon sources; glucose-induced repression involves hexokinase Hxk2p; HXK1 has a paralog, HXK2, that arose from the whole genome duplication hexokinase 1
YER054C	1.43068	1.57259e-11	3.03584e-10	69.052	68.895	30.931	21.2	No	GIP2	Putative regulatory subunit of protein phosphatase Glc7p; involved in glycogen metabolism; contains a conserved motif (GVNK motif) that is also found in Gac1p, Pig1p, and Pig2p; GIP2 has a paralog, PIG2, that arose from the whole genome duplication Gip2p
YMR193W	1.42946	1.06812e-10	1.82004e-09	81.033	98.343	27.561	40.321	No	MRPL24	Mitochondrial ribosomal protein of the large subunit; two mitochondrial ribosomal proteins, YmL14 and YmL24, have been assigned to the same gene mitochondrial 54S ribosomal protein YmL24/YmL14
YMR213W	1.42774	8.79191e-12	1.80482e-10	48.32	59.266	17.549	23.29	No	CEF1	Essential splicing factor; associated with Prp19p and the spliceosome, contains an N-terminal c-Myb DNA binding motif necessary for cell viability but not for Prp19p association, evolutionarily conserved and homologous to S. pombe Cdc5p Cef1p
YDL110C	1.42405	8.4626e-12	1.74954e-10	335.858	461.133	138.183	164.852	No	TMA17	ATPase dedicated chaperone that adapts proteasome assembly to stress; Tma17p is induced upon stress; interacts with Rpt6p to assist its pairing to Rpt3p and early steps in proteasome biogenesis; associates with ribosomes; heterozygous deletion demonstrated increases in chromosome instability in a rad9 deletion background; protein abundance is decreased upon intracellular iron depletion Tma17p
YER079W	1.42158	5.60887e-13	1.41557e-11	232.677	315.712	110.132	98.551	No	YER079W	hypothetical protein
YNL142W	1.4208	1.73092e-16	7.22592e-15	99.452	83.42	31.997	37.531	No	MEP2	Ammonium permease involved in regulation of pseudohyphal growth; belongs to a ubiquitous family of cytoplasmic membrane proteins that transport only ammonium (NH4+); expression is under the nitrogen catabolite repression regulation ammonium permease MEP2
YGR286C	1.42067	1.90257e-17	8.94517e-16	81.349	82.974	34.203	28.281	No	BIO2	Biotin synthase; catalyzes the conversion of dethiobiotin to biotin, which is the last step of the biotin biosynthesis pathway; complements E. coli bioB mutant biotin synthase
YOL032W	1.41965	8.05134e-17	3.52927e-15	262.944	320.503	103.502	118.884	No	OPI10	Protein with a possible role in phospholipid biosynthesis; null mutant displays an inositol-excreting phenotype that is suppressed by exogenous choline; protein abundance increases in response to DNA replication stress Opi10p
YMR104C	1.4195	1.53889e-10	2.51308e-09	123.434	166.675	62.56	48.058	No	YPK2	Protein kinase similar to S/T protein kinase Ypk1p; functionally redundant with YPK1 at the genetic level; participates in a signaling pathway required for optimal cell wall integrity; involved in the TORC-dependent phosphorylation of ribosomal proteins Rps6a/b (S6); human homolog SGK2 can complement a ypk1 ypk2 double mutant putative protein kinase YPK2
YMR186W	1.41779	2.5831e-09	3.36149e-08	1469.02	1659.35	683.278	508.642	No	HSC82	Cytoplasmic chaperone of the Hsp90 family; plays a role in determining prion variants; redundant in function and nearly identical with Hsp82p, and together they are essential; expressed constitutively at 10-fold higher basal levels than HSP82 and induced 2-3 fold by heat shock; contains two acid-rich unstructured regions that promote the solubility of chaperone-substrate complexes; HSC82 has a pa…
YDR309C	1.41632	2.2375e-19	1.3448e-17	73.402	79.28	30.587	27.792	No	GIC2	Redundant rho-like GTPase Cdc42p effector; involved in initiation of budding and cellular polarization; interacts with Cdc42p via the Cdc42/Rac-interactive binding (CRIB) domain and with PI(4,5)P2 via a polybasic region; GIC2 has a paralog, GIC1, that arose from the whole genome duplication Gic2p
YML110C	1.41579	7.41122e-20	4.80083e-18	523.719	596.187	211.306	216.423	No	COQ5	2-hexaprenyl-6-methoxy-1,4-benzoquinone methyltransferase; involved in ubiquinone (Coenzyme Q) biosynthesis; localizes to the matrix face of the mitochondrial inner membrane in a large complex with other ubiquinone biosynthetic enzymes; respiratory defect of the null mutant is partially complemented by human COQ5 2-hexaprenyl-6-methoxy-1,4-benzoquinone methyltransferase
YMR289W	1.40888	1.21816e-20	9.10493e-19	83.478	88.346	34.19	31.716	No	ABZ2	Aminodeoxychorismate lyase (4-amino-4-deoxychorismate lyase); catalyzes the third step in para-aminobenzoic acid biosynthesis; involved in folic acid biosynthesis aminodeoxychorismate lyase ABZ2
YHR053C	1.40795	1.3269e-23	1.47954e-21	13635.9	14595.7	5373.37	5466.87	No	CUP1-1	Metallothionein; binds copper and mediates resistance to high concentrations of copper and cadmium; locus is variably amplified in different strains, with two copies, CUP1-1 and CUP1-2, in the genomic sequence reference strain S288C; CUP1-1 has a paralog, CUP1-2, that arose from a segmental duplication metallothionein CUP1
YHR055C	1.40795	1.3269e-23	1.47954e-21	13635.9	14595.7	5373.37	5466.87	No	CUP1-2	Metallothionein; binds copper and mediates resistance to high concentrations of copper and cadmium; locus is variably amplified in different strains, with two copies, CUP1-1 and CUP1-2, in the genomic sequence reference strain S288C; CUP1-2 has a paralog, CUP1-1, that arose from a segmental duplication metallothionein CUP1
YMR077C	1.40377	1.11574e-10	1.88545e-09	78.731	104.627	30.502	40.243	No	VPS20	Myristoylated subunit of the ESCRT-III complex; the endosomal sorting complex required for transport of transmembrane proteins into the multivesicular body pathway to the lysosomal/vacuolar lumen; cytoplasmic protein recruited to endosomal membranes ESCRT-III subunit protein VPS20
YPL240C	1.40329	2.28108e-07	2.02416e-06	1158.6	1519.58	608.047	422.864	No	HSP82	Hsp90 chaperone; redundant in function with Hsc82p; required for pheromone signaling, negative regulation of Hsf1p; docks with Tom70p for mitochondrial preprotein delivery; promotes telomerase DNA binding, nucleotide addition; protein abundance increases in response to DNA replication stress; contains two acid-rich unstructured regions that promote solubility of chaperone-substrate complexes; HSP…
YBR169C	1.40247	6.64698e-12	1.39395e-10	266.011	321.278	129.776	96.539	No	SSE2	Member of Hsp110 subclass of the heat shock protein 70 (HSP70) family; serves as nucleotide exchange factor to load ATP onto the SSA class of cytosolic Hsp70s; may be involved in protein folding; localized to the cytoplasm; SSE2 has a paralog, SSE1, that arose from the whole genome duplication adenyl-nucleotide exchange factor SSE2
YMR277W	1.40094	9.09612e-15	2.99607e-13	65.762	58.189	26.323	21.456	No	FCP1	Carboxy-terminal domain (CTD) phosphatase; essential for dephosphorylation of the repeated C-terminal domain of the RNA polymerase II large subunit (Rpo21p); relocalizes to the cytosol in response to hypoxia protein serine/threonine phosphatase
YMR091C	1.40068	2.38541e-18	1.21991e-16	104.261	121.984	43.357	44.012	No	NPL6	Component of the RSC chromatin remodeling complex; interacts with Rsc3p, Rsc30p, Ldb7p, and Htl1p to form a module important for a broad range of RSC functions Npl6p
YML074C	1.39946	9.32687e-24	1.15693e-21	536.433	503.652	203.72	197.869	No	FPR3	Nucleolar peptidyl-prolyl cis-trans isomerase (PPIase); FK506 binding protein; affects expression of multiple genes via its role in nucleosome assembly; phosphorylated by casein kinase II (Cka1p-Cka2p-Ckb1p-Ckb2p) and dephosphorylated by Ptp1p; PPIase domain acts as a transcriptional repressor when tethered to DNA by lexA, and repressor activity is dependent on PPIase activity; FPR3 has a paralog…
YMR036C	1.39933	5.12772e-13	1.31117e-11	29.32	29.381	11.434	11.273	No	MIH1	Protein tyrosine phosphatase involved in cell cycle control; regulates the phosphorylation state of Cdc28p; homolog of S. pombe cdc25 putative tyrosine protein phosphatase MIH1
YMR005W	1.39678	8.86814e-19	4.78715e-17	84.701	86.843	30.404	36.008	No	TAF4	TFIID subunit (48 kDa); involved in RNA polymerase II transcription initiation; potential Cdc28p substrate Taf4p
YLR390W-A	1.39626	7.939e-15	2.66002e-13	698.173	777.291	308.362	262.57	No	CCW14	Covalently linked cell wall glycoprotein; present in the inner layer of the cell wall Ccw14p
YMR022W	1.39461	2.90191e-23	3.13299e-21	594.839	583.039	232.285	224.016	No	UBC7	Ubiquitin conjugating enzyme; involved in the ER-associated protein degradation (ERAD) pathway and in the inner nuclear membrane-associated degradation (INMAD) pathway; requires Cue1p for recruitment to the ER membrane; proposed to be involved in chromatin assembly E2 ubiquitin-conjugating protein UBC7
YML105C	1.39386	1.80227e-10	2.90255e-09	168.871	188.57	55.146	83.621	No	SEC65	Subunit of the signal recognition particle (SRP); involved in protein targeting to the ER; interacts with Srp54p; homolog of mammalian SRP19 RNA-binding signal recognition particle subunit SEC65
YML028W	1.39024	1.74569e-12	4.02269e-11	6557.16	5429.35	2323.95	2331.91	No	TSA1	Thioredoxin peroxidase; acts as both ribosome-associated and free cytoplasmic antioxidant; self-associates to form high-molecular weight chaperone complex under oxidative stress; chaperone activity essential for growth in zinc deficiency; required for telomere length maintenance; binds and modulates Cdc19p activity; protein abundance increases, forms cytoplasmic foci during DNA replication stress…
YMR254C	1.38944	0.00252882	0.00756441	14.711	6.487	3.701	4.48	No	YMR254C	hypothetical protein; conserved across S. cerevisiae strains hypothetical protein
YCL019W	1.38378	2.44231e-05	0.000130033	31.735	27.383	7.353	15.73	No	YCL019W	Retrotransposon TYA Gag and TYB Pol genes; transcribed/translated as one unit; polyprotein is processed to make a nucleocapsid-like protein (Gag), reverse transcriptase (RT), protease (PR), and integrase (IN); similar to retroviral genes gag-pol fusion protein
YMR092C	1.38334	9.12979e-22	8.18872e-20	147.65	153.74	61.579	56.174	No	AIP1	Actin cortical patch component; interacts with the actin depolymerizing factor cofilin; inhibits elongation of aged ADP-actin filaments decorated with cofilin to maintain a high level of assembly-competent actin species; required to restrict cofilin localization to cortical patches; putative regulator of cytokinesis; contains WD repeats; protein increases in abundance and relocalizes from cytopla…
YBL051C	1.38182	3.22201e-09	4.09244e-08	50.643	47.814	23.406	15.108	No	PIN4	Protein involved in G2/M phase progression and response to DNA damage; interacts with Rad53p; contains an RNA recognition motif, a nuclear localization signal, and several SQ/TQ cluster domains; hyperphosphorylated in response to DNA damage Pin4p
YML065W	1.38065	9.58571e-13	2.29036e-11	31.826	35.431	12.377	13.985	No	ORC1	Largest subunit of the origin recognition complex; involved in directing DNA replication by binding to replication origins; also involved in transcriptional silencing; exhibits ATPase activity; ORC1 has a paralog, SIR3, that arose from the whole genome duplication origin recognition complex subunit 1
YMR244C-A	1.3794	1.55394e-09	2.10197e-08	350.314	327.116	102.742	162.873	No	COA6	Protein involved in cytochrome c oxidase (Complex IV) assembly; involved in delivery of copper to Complex IV; also required for efficient formation of respiratory supercomplexes comprised of Complexes III and IV; localizes to the mitochondrial intermembrane space; ortholog implicated in cardiac defects in zebrafish and human; transcription is induced in response to the DNA-damaging agent MMS; pro…
YMR323W	1.37938	9.85741e-05	0.000449325	8.772	8.96	3.603	3.313	No	ERR3	Enolase, a phosphopyruvate hydratase; catalyzes the conversion of 2-phosphoglycerate to phosphoenolpyruvate; complements the growth defect of an ENO1 ENO2 double mutant in glucose phosphopyruvate hydratase ERR3
YMR250W	1.37586	5.01896e-08	5.21578e-07	1236.08	1253.72	584.384	391.67	No	GAD1	Glutamate decarboxylase; converts glutamate into gamma-aminobutyric acid (GABA) during glutamate catabolism; involved in response to oxidative stress glutamate decarboxylase GAD1
YKL054C	1.37435	2.65989e-15	9.57232e-14	89.947	96.171	40.391	32.761	No	DEF1	RNAPII degradation factor; forms a complex with Rad26p in chromatin, enables ubiquitination and proteolysis of RNAPII present in an elongation complex; mutant is deficient in Zip1p loading onto chromosomes during meiosis DNA damage-responsive RNA polymerase-degradation factor DEF1
YMR027W	1.37237	5.00452e-19	2.86043e-17	279.897	328.483	122.092	117.417	No	YMR027W	A metal-dependent phosphatase, part of the DUF89 protein family; dephosphorylates fructose-1-phosphate; human ortholog, C6orf211 is involved in response to DNA damage; green fluorescent protein (GFP)-fusion protein localizes to the nucleus and cytoplasm; YMR027W is not an essential gene putative methyltransferase
YKR039W	1.36941	9.20359e-07	7.09748e-06	165.265	185.846	47.928	90.858	No	GAP1	General amino acid permease; Gap1p senses the presence of amino acid substrates to regulate localization to the plasma membrane when needed; essential for invasive growth amino acid permease GAP1
YMR075W	1.36189	3.71176e-13	9.66053e-12	31.551	31.524	12.218	12.762	No	RCO1	Essential component of the Rpd3S histone deacetylase complex; interacts with Eaf3p Rco1p
YAL005C	1.36171	2.11815e-08	2.33879e-07	3301.8	3556.55	1550.6	1165.85	No	SSA1	ATPase involved in protein folding and NLS-directed nuclear transport; member of HSP70 family; required for ubiquitin-dependent degradation of short-lived proteins; forms chaperone complex with Ydj1p; localized to nucleus, cytoplasm, cell wall; 98% identical to paralog Ssa2p with different functional specificity in propagation of yeast [URE3] prions, vacuolar-mediated degradations of gluconeogene…
YCL064C	1.35938	1.17626e-07	1.12976e-06	927.559	1416.41	454.902	476.892	No	CHA1	Catabolic L-serine (L-threonine) deaminase; catalyzes the degradation of both L-serine and L-threonine; required to use serine or threonine as the sole nitrogen source, transcriptionally induced by serine and threonine L-serine/L-threonine ammonia-lyase CHA1
YML094W	1.35597	4.31131e-11	7.73382e-10	220.992	186.786	66.934	95.338	No	GIM5	Subunit of the heterohexameric cochaperone prefoldin complex; prefoldin binds specifically to cytosolic chaperonin and transfers target proteins to it; prefoldin complex also localizes to chromatin of actively transcribed genes in the nucleus and facilitates transcriptional elongation Gim5p
YMR147W	1.35079	5.03143e-10	7.46393e-09	23.798	22.913	9.914	8.738	No	YMR147W	hypothetical protein; SWAT-GFP and mCherry fusion proteins localize to the cell periphery hypothetical protein
YMR111C	1.35041	5.27639e-13	1.34329e-11	31.551	33.182	13.051	12.862	No	YMR111C	hypothetical protein; green fluorescent protein (GFP)-fusion protein localizes to the nucleus; YMR111C is not an essential gene; forms nuclear foci upon DNA replication stress hypothetical protein
YBR233W	1.34946	1.90789e-11	3.65888e-10	36.411	34.53	12.328	16.019	No	PBP2	RNA binding protein; has similarity to mammalian heterogeneous nuclear RNP K protein, involved in the regulation of telomere position effect and telomere length; relative distribution to the nucleus increases upon DNA replication stress Pbp2p
YOR343W-B	1.3492	7.55211e-09	8.91271e-08	45.376	43.955	13.872	21.856	No	YOR343C-B	Retrotransposon TYA Gag and TYB Pol genes; transcribed/translated as one unit; polyprotein is processed to make a nucleocapsid-like protein (Gag), reverse transcriptase (RT), protease (PR), and integrase (IN); similar to retroviral genes gag-pol fusion protein
YML098W	1.34917	1.98124e-13	5.39749e-12	127.499	158.103	52.204	62.143	No	TAF13	TFIID subunit (19 kDa); involved in RNA polymerase II transcription initiation, similar to histone H4 with atypical histone fold motif of Spt3-like transcription factors Taf13p
YMR099C	1.34812	1.40182e-18	7.36272e-17	364.078	412.262	161.724	149.022	No	YMR099C	Glucose-6-phosphate 1-epimerase (hexose-6-phosphate mutarotase); likely involved in carbohydrate metabolism; GFP-fusion protein localizes to both the nucleus and cytoplasm and is induced in response to the DNA-damaging agent MMS glucose-6-phosphate 1-epimerase
YML114C	1.34465	1.36346e-19	8.54731e-18	82.581	88.074	34.864	33.684	No	TAF8	TFIID subunit (65 kDa); involved in RNA polymerase II transcription initiation Taf8p
YGR249W	1.34022	1.4244e-10	2.33265e-09	101.531	85.738	43.688	31.539	Yes	MGA1	Protein similar to heat shock transcription factor; multicopy suppressor of pseudohyphal growth defects of ammonium permease mutants Mga1p
YMR166C	1.33952	4.67259e-16	1.86583e-14	48.555	47.009	18.247	20.233	No	MME1	Transporter of the mitochondrial inner membrane that exports magnesium; involved in mitochondrial Mg2+ homeostasis; has similarity to human mitochondrial ATP-Mg/Pi carriers Mme1p
YDL021W	1.33469	2.21328e-10	3.50636e-09	221.481	271.942	82.914	116.672	No	GPM2	Homolog of Gpm1p phosphoglycerate mutase; converts 3-phosphoglycerate to 2-phosphoglycerate in glycolysis; may be non-functional; GPM2 has a paralog, GPM3, that arose from the whole genome duplication phosphoglycerate mutase family protein GPM2
YFL002W-A	1.33139	2.00331e-07	1.81355e-06	113.308	122.255	34.754	60.709	No	YFL002W-A	Retrotransposon TYA Gag and TYB Pol genes; transcribed/translated as one unit; polyprotein is processed to make a nucleocapsid-like protein (Gag), reverse transcriptase (RT), protease (PR), and integrase (IN); similar to retroviral genes gag-pol fusion protein
YGR161W-B	1.33139	2.00331e-07	1.81355e-06	113.308	122.255	34.754	60.709	No	YGR161W-B	Retrotransposon TYA Gag and TYB Pol genes; transcribed/translated as one unit; polyprotein is processed to make a nucleocapsid-like protein (Gag), reverse transcriptase (RT), protease (PR), and integrase (IN); similar to retroviral genes gag-pol fusion protein
YML010W	1.33031	7.42677e-19	4.08472e-17	80.228	86.814	32.989	34.729	No	SPT5	Spt4p/5p (DSIF) transcription elongation factor complex subunit; the Spt4/5 complex binds to ssRNA in a sequence-specific manner, and in concert with RNAP I and II has multiple roles regulating transcriptional elongation, RNA processing, quality control, and transcription-coupled repair; interacts with DNA upstream of RNAPII and the non-template strand of the transcription bubble; Spt5p is the on…
YOL084W	1.32799	2.75829e-09	3.56559e-08	47.21	56.211	24.595	17.353	No	PHM7	hypothetical protein; expression is regulated by phosphate levels; green fluorescent protein (GFP)-fusion protein localizes to the cell periphery and vacuole; protein abundance increases in response to DNA replication stress Phm7p
YIR010W	1.32618	4.07625e-09	5.03486e-08	26.834	35.519	12.095	13.251	No	DSN1	Essential component of the MIND kinetochore complex; joins kinetochore subunits contacting DNA to those contacting microtubules; Dsn1p phosphorylation promotes interaction between outer and inner kinetochore proteins; kinetochore receptor for monopolin, via interaction with subunit Csm1p; essential for meiotic but not mitotic chromosome segregation; MIND complex consists of Mtw1p, Nnf1p, Nsl1p an…
YML020W	1.32609	4.72916e-13	1.21458e-11	34.261	33.395	13.161	14.352	No	YML020W	hypothetical protein
YMR124W	1.32329	4.35209e-18	2.15023e-16	75.277	82.829	32.23	32.128	No	EPO1	Protein involved in septin-ER tethering; interacts with ER membrane protein, Scs2p, and Shs1p, a septin ring component, at bud neck to create ER diffusion barrier; GFP-fusion protein localizes to the cell periphery, cytoplasm, bud, and bud neck; interacts with Crm1p in two-hybrid assay; YMR124W has a paralog, YLR031W, that arose from the whole genome duplication Epo1p
YMR089C	1.32188	7.93955e-20	5.03686e-18	94.858	96.685	40.293	37.853	No	YTA12	Mitochondrial inner membrane m-AAA protease component; mediates degradation of misfolded or unassembled proteins; also required for correct assembly of mitochondrial enzyme complexes; overexpression of human AFG3L2 complements respiratory defect of yeast afg3 yta12 double null mutation, but overexpression of disease-associated AFG3L2 variants does not; expression of both human SPG7 (paraplegin) a…
YMR302C	1.32101	1.79425e-12	4.1183e-11	110.068	135.122	54.41	45.624	No	YME2	Integral inner mitochondrial membrane protein; role in maintaining mitochondrial nucleoid structure and number; mutants exhibit an increased rate of mitochondrial DNA escape; shows some sequence similarity to exonucleases Yme2p
YMR195W	1.32093	1.07392e-10	1.82004e-09	655.925	872.056	310.041	313.485	No	ICY1	hypothetical protein; required for viability in rich media of cells lacking mitochondrial DNA; mutants have an invasive growth defect with elongated morphology; induced by amino acid starvation; ICY1 has a paralog, ICY2, that arose from the whole genome duplication Icy1p
YFL021W	1.32068	2.69397e-22	2.61764e-20	140.091	138.924	57.793	56.062	Yes	GAT1	Transcriptional activator of nitrogen catabolite repression genes; contains a GATA-1-type zinc finger DNA-binding motif; activity and localization regulated by nitrogen limitation and Ure2p; different translational starts produce two major and two minor isoforms that are differentially regulated and localized Gat1p
YML099C	1.31485	1.18625e-15	4.52014e-14	54.025	59.683	24.092	22.512	Yes	ARG81	Zinc finger transcription factor involved in arginine-responsive genes; Zn(2)-Cys(6) binuclear cluster domain type; involved in the regulation of arginine-responsive genes; acts with Arg80p and Arg82p Arg81p
YMR211W	1.31383	2.36678e-12	5.28672e-11	59.629	49.424	20.171	24.468	No	DML1	Essential protein involved in mtDNA inheritance; may also function in the partitioning of the mitochondrial organelle or in the segregation of chromosomes, exhibits regions similar to members of a GTPase family Dml1p
YMR188C	1.31367	7.02653e-07	5.59626e-06	91.424	118.202	31.96	54.15	No	MRPS17	Mitochondrial ribosomal protein of the small subunit mitochondrial 37S ribosomal protein MRPS17
YMR263W	1.31333	4.95851e-11	8.81345e-10	150.289	180.91	57.842	78.085	No	SAP30	Component of Rpd3L histone deacetylase complex; involved in silencing at telomeres, rDNA, and silent mating-type loci; involved in telomere maintenance Sap30p
YBL064C	1.31224	8.67797e-15	2.87458e-13	530.799	574.263	245.104	208.075	No	PRX1	Mitochondrial peroxiredoxin with thioredoxin peroxidase activity; has a role in reduction of hydroperoxides; reactivation requires Trr2p and glutathione; induced during respiratory growth and oxidative stress; phosphorylated; protein abundance increases in response to DNA replication stress thioredoxin peroxidase PRX1
YMR200W	1.31119	6.07752e-21	4.9211e-19	214.237	237.509	93.343	92.17	No	ROT1	Molecular chaperone involved in protein folding in ER; mutation causes defects in cell wall synthesis and lysis of autophagic bodies, suppresses tor2 mutations, and is synthetically lethal with kar2-1 and with rot2 mutations; involved in N-linked glycosylation and O-mannosylation; transmembrane helix Ser250 is essential for Rot1p to interact with other membrane components and exert its functional…
YMR269W	1.30927	6.47168e-09	7.77936e-08	30.074	28.44	9.951	14.018	No	TMA23	Nucleolar protein implicated in ribosome biogenesis; deletion extends chronological lifespan Tma23p
YMR278W	1.30457	2.88693e-11	5.36012e-10	79.036	99.187	40.354	33.239	No	PRM15	Phosphoribomutase; catalyzes interconversion of ribose-1-phosphate and ribose-5-phosphate; has some phosphoglucomutase activity but primary activity in vivo is phosphoribomutase; contributes to ribose recycling in the pentose phosphate pathway; transcription induced in response to stress; green fluorescent protein (GFP)-fusion protein localizes to the cytoplasm and nucleus; non-essential phosphor…
YMR286W	1.30101	3.5847e-21	3.02881e-19	529.22	495.837	209.038	214.634	No	MRPL33	Mitochondrial ribosomal protein of the large subunit mitochondrial 54S ribosomal protein YmL33
YMR084W	1.29991	2.13988e-09	2.82251e-08	45.508	42.122	21.286	14.986	No	YMR084W	hypothetical protein; YMR084W and adjacent ORF YMR085W are merged in related strains, and together are paralogous to glutamine-fructose-6-phosphate amidotransferase GFA1 putative glutamine--fructose-6-phosphate transaminase
YOR194C	1.29919	2.29636e-12	5.16902e-11	79.383	96.016	32.744	40.021	No	TOA1	TFIIA large subunit; involved in transcriptional activation, acts as antirepressor or as coactivator; required, along with Toa2p, for ribosomal protein gene transcription in vivo; homologous to largest and second largest subunits of human and Drosophila TFIIA transcription initiation factor IIA large subunit
YKL032C	1.29293	2.47319e-12	5.4824e-11	106.543	120.064	52.658	41.588	Yes	IXR1	Transcriptional repressor that regulates hypoxic genes during normoxia; involved in the aerobic repression of genes such as COX5b, TIR1, and HEM13; binds DNA intrastrand cross-links formed by cisplatin; HMG (high mobility group box) domain containing protein which binds and bends cisplatin-modified DNA, blocking excision repair; IXR1 has a paralog, ABF2, that arose from the whole genome duplicati…
YML061C	1.29085	1.22545e-10	2.04095e-09	25.968	27.635	11.115	11.195	No	PIF1	DNA helicase, potent G-quadruplex DNA binder/unwinder; possesses strand annealing activity; promotes DNA synthesis during break-induced replication; important for crossover recombination; translation from different start sites produces mitochondrial and nuclear forms; nuclear form is a catalytic inhibitor of telomerase; mitochondrial form involved in DNA repair and recombination; mutations affect…
YBL112C	1.28937	0.00382122	0.0108566	7.58	15.932	5.943	3.935	No	YBL112C	hypothetical protein; YBL112C is contained within TEL02L hypothetical protein
YKL068W-A	1.28928	2.08783e-08	2.30968e-07	441.362	522.173	237.886	163.463	No	YKL068W-A	hypothetical protein; identified by homology to Ashbya gossypii hypothetical protein
YMR139W	1.28664	4.83944e-21	3.9738e-19	190.663	206.771	83.111	82.965	No	RIM11	Protein kinase; required for signal transduction during entry into meiosis; promotes the formation of the Ime1p-Ume6p complex by phosphorylating Ime1p and Ume6p; shares similarity with mammalian glycogen synthase kinase 3-beta; protein abundance increases in response to DNA replication stress; RIM11 has a paralog, MRK1, that arose from the whole genome duplication serine/threonine protein kinase …
YPL274W	1.28621	3.69426e-06	2.47558e-05	363.864	420.029	209.933	117.039	No	SAM3	High-affinity S-adenosylmethionine permease; required for utilization of S-adenosylmethionine as a sulfur source; has similarity to S-methylmethionine permease Mmp1p bifunctional polyamine/amino acid permease SAM3
YML052W	1.28562	1.29973e-23	1.47954e-21	380.052	367.143	154.518	157.671	No	SUR7	Plasma membrane protein, component of eisosomes; long-lived protein that remains stable in eisosomes of mother cells while other eisosome proteins, Pil1p and Lsp1p, turn over; may function to anchor the eisosome in place; sporulation and plasma membrane sphingolipid content are altered in mutants; localizes to furrow-like invaginations (MCC patches) Sur7p
YMR070W	1.2832	1.3377e-14	4.30872e-13	53.822	48.726	22.365	20.511	Yes	MOT3	Transcriptional repressor, activator; role in cellular adjustment to osmotic stress including modulation of mating efficiency; involved in repression of subset of hypoxic genes by Rox1p, repression of several DAN/TIR genes during aerobic growth, ergosterol biosynthetic genes in response to hyperosmotic stress; contributes to recruitment of Tup1p-Cyc8p general repressor to promoters; relocalizes t…
YMR158W	1.28288	2.95692e-14	8.97855e-13	134.131	119.724	47.523	58.742	No	MRPS8	Mitochondrial ribosomal protein of the small subunit mitochondrial 37S ribosomal protein MRPS8
YOL051W	1.27974	3.00515e-12	6.5618e-11	35.005	39.155	15.931	15.252	No	GAL11	Subunit of the RNA polymerase II mediator complex; associates with core polymerase subunits to form the RNA polymerase II holoenzyme; affects transcription by acting as target of activators and repressors; forms part of the tail domain of mediator Gal11p
YFL014W	1.27909	6.14329e-06	3.83463e-05	4683.7	5470.22	2583.29	1674.2	No	HSP12	Plasma membrane protein involved in maintaining membrane organization; involved in maintaining organization during stress conditions; induced by heat shock, oxidative stress, osmostress, stationary phase, glucose depletion, oleate and alcohol; protein abundance increased in response to DNA replication stress and dietary restriction; regulated by the HOG and Ras-Pka pathways; required for dietary …
YER150W	1.27734	2.82507e-07	2.47244e-06	4937.69	5151.86	2473.78	1761.95	No	SPI1	GPI-anchored cell wall protein involved in weak acid resistance; basal expression requires Msn2p/Msn4p; expression is induced under conditions of stress and during the diauxic shift; SPI1 has a paralog, SED1, that arose from the whole genome duplication Spi1p
YMR108W	1.27087	1.90454e-12	4.33729e-11	423.727	465.021	208.426	166.598	No	ILV2	Acetolactate synthase; catalyses the first common step in isoleucine and valine biosynthesis and is the target of several classes of inhibitors, localizes to the mitochondria; expression of the gene is under general amino acid control acetolactate synthase catalytic subunit
YMR172W	1.26375	3.45729e-12	7.46518e-11	33.273	32.862	14.081	13.929	Yes	HOT1	Transcription factor for glycerol biosynthetic genes; required for the transient induction of glycerol biosynthetic genes GPD1 and GPP2 in response to high osmolarity; targets Hog1p to osmostress responsive promoters; has similarity to Msn1p and Gcr1p Hot1p
YDR169C	1.25845	7.12312e-19	3.95503e-17	86.504	84.661	36.237	36.675	Yes	STB3	Ribosomal RNA processing element (RRPE)-binding protein; involved in the glucose-induced transition from quiescence to growth; restricted to nucleus in quiescent cells, released into cytoplasm after glucose repletion; binds Sin3p; relative distribution to the nucleus increases upon DNA replication stress Stb3p
YMR060C	1.25712	4.21597e-18	2.10078e-16	72.873	72.928	30.931	31.25	No	SAM37	Component of the Sorting and Assembly Machinery (SAM) complex; the SAM (or TOB) complex is located in the mitochondrial outer membrane; binds precursors of beta-barrel proteins and facilitates their outer membrane insertion; contributes to SAM complex stability SAM complex subunit SAM37
YGR055W	1.25675	1.55713e-05	8.77776e-05	965.121	871.969	497.732	283.692	No	MUP1	High affinity methionine permease; integral membrane protein with 13 putative membrane-spanning regions; also involved in cysteine uptake Mup1p
YMR270C	1.25199	4.17722e-14	1.24888e-12	88.307	80.046	32.56	39.443	No	RRN9	Protein involved in promoting high level transcription of rDNA; subunit of UAF (upstream activation factor) for RNA polymerase I Rrn9p
YGR154C	1.24758	0.022041	0.048384	63.51	138.458	45.464	41.344	No	GTO1	Omega-class glutathione transferase; induced under oxidative stress; putative peroxisomal localization omega-class glutathione transferase
YOR391C	1.24757	6.59318e-05	0.000317147	13.376	21.662	7.561	7.526	No	HSP33	Possible chaperone and cysteine protease; required for transcriptional reprogramming during the diauxic shift and for survival in stationary phase; similar to E. coli Hsp31 and S. cerevisiae Hsp31p, Hsp32p, and Sno4p; member of the DJ-1/ThiJ/PfpI superfamily, which includes human DJ-1 involved in Parkinson's disease and cancer glutathione-independent methylglyoxalase family protein
YMR066W	1.24669	8.48526e-08	8.47073e-07	19.948	22.671	8.345	9.972	No	SOV1	Mitochondrial hypothetical protein Sov1p
YJL101C	1.24626	4.52594e-05	0.00022591	108.733	182.927	77.326	47.947	No	GSH1	Gamma glutamylcysteine synthetase; catalyzes the first step in glutathione (GSH) biosynthesis; expression induced by oxidants, cadmium, and mercury; protein abundance increases in response to DNA replication stress glutamate--cysteine ligase
YFR041C	1.24529	8.22378e-12	1.70621e-10	110.852	117.833	42.303	56.062	No	ERJ5	Type I membrane protein with a J domain; required to preserve the folding capacity of the endoplasmic reticulum; loss of the non-essential ERJ5 gene leads to a constitutively induced unfolded protein response Erj5p
YMR021C	1.24446	5.10646e-15	1.76158e-13	54.749	58.771	25.085	23.768	Yes	MAC1	Copper-sensing transcription factor; involved in regulation of genes required for high affinity copper transport; required for regulation of yeast copper genes in response to DNA-damaging agents; undergoes changes in redox state in response to changing levels of copper or MMS Mac1p
YOR173W	1.24249	3.40621e-12	7.38223e-11	311.153	397.358	156.613	148.622	No	DCS2	m(7)GpppX pyrophosphatase regulator; non-essential, stress induced regulatory protein; modulates m7G-oligoribonucleotide metabolism; inhibits Dcs1p; regulated by Msn2p, Msn4p, and the Ras-cAMP-cAPK signaling pathway; mutant has increased aneuploidy tolerance; DCS2 has a paralog, DCS1, that arose from the whole genome duplication 5'-(N(7)-methyl 5'-triphosphoguanosine)-(mRNA) diphosphatase
YNL136W	1.23981	5.15258e-07	4.23093e-06	43.135	54.922	16.617	25.758	No	EAF7	Subunit of the NuA4 histone acetyltransferase complex; NuA4 acetylates the N-terminal tails of histones H4 and H2A Eaf7p
YMR061W	1.23945	4.47235e-14	1.31686e-12	62.094	71.833	28.136	29.715	No	RNA14	Component of the cleavage and polyadenylation factor I (CF I); CF 1, composed of the CF 1A complex (Rna14p, Rna15p, Clp1p, Pcf11p) and Hrp1, is involved in cleavage and polyadenylation of mRNA 3' ends; bridges interaction between Rna15p and Hrp1p in the CF I complex; mutant displays reduced transcription elongation in the G-less-based run-on (GLRO) assay; required for gene looping and maintenance…
YHL036W	1.23928	5.62861e-05	0.000274371	94.776	91.109	54.006	26.091	No	MUP3	Low affinity methionine permease; similar to Mup1p Mup3p
YMR276W	1.23602	1.03394e-15	3.99196e-14	400.234	415.054	189.015	163.44	No	DSK2	Nuclear-enriched ubiquitin-like polyubiquitin-binding protein; required for spindle pole body (SPB) duplication and for transit through the G2/M phase of the cell cycle; involved in proteolysis; interacts with the proteasome; protein abundance increases in response to DNA replication stress Dsk2p
YOR052C	1.23455	6.76406e-18	3.25905e-16	203.886	223.594	95.978	89.146	No	TMC1	AN1-type zinc finger protein, effector of proteotoxic stress response; stress-inducible transcriptional target of Rpn4p; induced by nitrogen limitation, weak acid, misfolded proteins; short-lived protein, degraded by proteasome; may protect cells from trivalent metalloid induced proteotoxicity; contains PACE promoter element; ortholog of human AIRAP, which stimulates proteasome activity in respon…
YIR032C	1.23368	3.24094e-06	2.20218e-05	42.422	51.46	15.024	25.724	No	DAL3	Ureidoglycolate lyase; converts ureidoglycolate to glyoxylate and urea in the third step of allantoin degradation; expression is sensitive to nitrogen catabolite repression; this enzyme is sometimes referred to 'ureidoglycolate hydrolase' but should not be confused with the Arabidopsis thaliana ureidoglycolate hydrolase enzyme which converts ureidoglycolate to glyoxylate, ammonia and carbon dioxi…
YMR033W	1.23298	9.33102e-15	3.05617e-13	89.906	101.116	38.994	43.812	No	ARP9	Component of both the SWI/SNF and RSC chromatin remodeling complexes; actin-related protein involved in transcriptional regulation Arp9p
YPR035W	1.23206	3.27218e-13	8.67128e-12	673.611	648.83	259.601	314.152	No	GLN1	Glutamine synthetase (GS); synthesizes glutamine from glutamate and ammonia; with Glt1p, forms the secondary pathway for glutamate biosynthesis from ammonia; expression regulated by nitrogen source and by amino acid limitation; forms filaments of back-to-back stacks of cylindrical homo-decamers at low pH, leading to enzymatic inactivation and storage during states of advanced cellular starvation;…
YLR206W	1.23202	2.69855e-08	2.93518e-07	150.798	166.055	82.204	55.118	No	ENT2	Epsin-like protein required for endocytosis and actin patch assembly; functionally redundant with Ent1p; contains clathrin-binding motif at C-terminus; ENT2 has a paralog, ENT1, that arose from the whole genome duplication epsin
YMR273C	1.22965	5.38927e-10	7.91033e-09	44.164	45.089	22.12	16.698	No	ZDS1	Protein with a role in regulating Swe1p-dependent polarized growth; involved in maintaining Cdc55p in the cytoplasm where it promotes mitotic entry; involved in mitotic exit through Cdc14p regulation; interacts with silencing proteins at telomeres; has a role in Bcy1p localization; implicated in mRNA nuclear export; ZDS1 has a paralog, ZDS2, that arose from the whole genome duplication Zds1p
YML037C	1.21957	0.000442352	0.00164471	9.576	9.774	3.529	4.925	No	YML037C	hypothetical protein; has some characteristics of a transcriptional activator; may be a target of Dbf2p-Mob1p kinase; GFP-fusion protein co-localizes with clathrin-coated vesicles; YML037C is not an essential gene hypothetical protein
YML060W	1.21868	0.000275904	0.00109423	13.509	10.007	5.809	4.413	No	OGG1	Nuclear and mitochondrial glycosylase/lyase; specifically excises 7,8-dihydro-8-oxoguanine residues located opposite cytosine or thymine residues in DNA, repairs oxidative damage to mitochondrial DNA, contributes to UVA resistance 8-oxoguanine glycosylase OGG1
YMR194C-B	1.2183	2.61675e-07	2.29754e-06	299.274	467.436	174.235	161.817	No	CMC4	Protein that localizes to the mitochondrial intermembrane space; localizes via the Mia40p-Erv1p system; contains twin cysteine-x(9)-cysteine motifs Cmc4p
YHR104W	1.21009	1.87142e-10	2.99736e-09	937.686	881.85	441.079	359.453	No	GRE3	Aldose reductase; involved in methylglyoxal, d-xylose, arabinose, and galactose metabolism; stress induced (osmotic, ionic, oxidative, heat shock, starvation and heavy metals); regulated by the HOG pathway; protein abundance increases in response to DNA replication stress trifunctional aldehyde reductase/xylose reductase/glucose 1-dehydrogenase (NADP(+))
YMR182C	1.20745	2.48294e-08	2.72609e-07	176.482	197.608	97.975	67.013	Yes	RGM1	Putative zinc finger DNA binding transcription factor; contains two N-terminal C2H2 zinc fingers and C-terminal proline rich domain; overproduction impairs cell growth and induces expression of genes involved in monosaccharide catabolism and aldehyde metabolism; regulates expression of of Y' telomeric elements and subtelomeric COS genes; relocalizes to the cytosol in response to hypoxia; RGM1 has…
YML058W	1.20484	5.15113e-07	4.23093e-06	2056.34	2340.09	835.995	1109.44	No	SML1	Ribonucleotide reductase inhibitor; involved in regulating dNTP production; regulated by Mec1p and Rad53p during DNA damage and S phase; SML1 has a paralog, DIF1, that arose from the whole genome duplication ribonucleotide reductase inhibiting protein SML1
YDL204W	1.20469	5.35693e-07	4.38636e-06	326.577	371.216	188.426	119.629	No	RTN2	Reticulon protein; involved in nuclear pore assembly and maintenance of tubular ER morphology; promotes membrane curvature; regulates the ER asymmetry-induced inheritance block during ER stress; role in ER-derived peroxisomal biogenesis; interacts with Sec6p, Yip3p, and Sbh1p; less abundant than RTN1; member of RTNLA (reticulon-like A) subfamily; protein increases in abundance and relocalizes to …
YIL136W	1.20342	2.48119e-09	3.23609e-08	576.155	741.608	309.808	273.309	No	OM45	Mitochondrial outer membrane hypothetical protein; major constituent of the outer membrane, extending into the intermembrane space; interacts with porin (Por1p) and with Om14p; imported via the presequence pathway involving the TOM and TIM23 complexes, then assembled in the outer membrane by Mim1p; protein abundance increases in response to DNA replication stress Om45p
YJL073W	1.19709	1.16348e-07	1.11999e-06	42.697	30.38	15.159	17.242	No	JEM1	DnaJ-like chaperone required for nuclear membrane fusion during mating; localizes to the ER membrane; exhibits genetic interactions with KAR2 Jem1p
YDR070C	1.19653	1.22418e-11	2.44416e-10	734.238	855.669	366.62	340.221	No	FMP16	hypothetical protein; may be involved in responding to conditions of stress; the authentic, non-tagged protein is detected in highly purified mitochondria in high-throughput studies; protein abundance increases in response to DNA replication stress Fmp16p
YOR308C	1.19632	0.000757384	0.0026488	9.76	10.56	3.48	5.547	No	SNU66	Component of the U4/U6.U5 snRNP complex; involved in pre-mRNA splicing via spliceosome; also required for pre-5S rRNA processing and may act in concert with Rnh70p; has homology to human SART-1 U4/U6-U5 snRNP complex subunit SNU66
YLR151C	1.19364	3.87912e-06	2.57871e-05	24.787	38.088	13.272	14.785	No	PCD1	8-oxo-dGTP diphosphatase; prevents spontaneous mutagenesis via sanitization of oxidized purine nucleoside triphosphates; can also act as peroxisomal pyrophosphatase with specificity for coenzyme A and CoA derivatives, may function to remove potentially toxic oxidized CoA disulfide from peroxisomes to maintain the capacity for beta-oxidation of fatty acids; nudix hydrolase family member; similar E…
YDR054C	1.19302	1.9249e-12	4.36661e-11	108.041	128.422	55.452	50.004	No	CDC34	Ubiquitin-conjugating enzyme (E2); catalytic subunit of SCF ubiquitin-protein ligase complex (together with Skp1p, Rbx1p, Cdc53p, and an F-box protein) that regulates cell cycle progression by targeting key substrates for degradation; protein abundance increases in response to DNA replication stress; human CDC34 functionally complements the thermosensitivity of the cdc34-2 mutant SCF E2 ubiquitin…
YMR224C	1.19128	5.95419e-08	6.06869e-07	20.895	23.204	9.424	10.305	No	MRE11	Nuclease subunit of the MRX complex with Rad50p and Xrs2p; complex functions in repair of DNA double-strand breaks and in telomere stability; Mre11p associates with Ser/Thr-rich ORFs in premeiotic phase; nuclease activity required for MRX function; widely conserved; forms nuclear foci upon DNA replication stress MRX complex nuclease subunit
YMR110C	1.18954	1.33635e-10	2.20706e-09	319.649	398.463	173.022	147.788	No	HFD1	Dehydrogenase involved in ubiquinone and sphingolipid metabolism; oxidizes 4-hydroxybenzaldehyde into 4-hydroxybenzoic acid in ubiquinone biosynthesis; converts hexadecenal to hexadecenoic acid in sphingosine 1-phosphate breakdown pathway; located in the mitochondrial outer membrane and also in lipid particles; human homolog ALDH3A2, a fatty aldehyde dehydrogenase (FALDH) mutated in neurocutaneou…
YBR302C	1.18953	1.66918e-20	1.2014e-18	265.848	252.267	112.828	118.484	No	COS2	Endosomal protein involved in turnover of plasma membrane proteins; member of the DUP380 subfamily of conserved, often subtelomeric COS genes; required for the multivesicular vesicle body sorting pathway that internalizes plasma membrane proteins for degradation; Cos proteins provide ubiquitin in trans for nonubiquitinated cargo proteins Cos2p
YML132W	1.18953	1.66918e-20	1.2014e-18	265.848	252.267	112.828	118.484	No	COS3	Endosomal protein involved in turnover of plasma membrane proteins; member of the DUP380 subfamily of conserved, often subtelomeric COS genes; required for the multivesicular vesicle body sorting pathway that internalizes plasma membrane proteins for degradation; Cos proteins provide ubiquitin in trans for nonubiquitinated cargo proteins Cos3p
YML069W	1.1877	4.55017e-12	9.75276e-11	144.961	169.516	63.883	76.873	No	POB3	Subunit of the heterodimeric FACT complex (Spt16p-Pob3p); FACT associates with chromatin via interaction with Nhp6Ap and Nhp6Bp, and reorganizes nucleosomes to facilitate access to DNA by RNA and DNA polymerases; protein abundance increases in response to DNA replication stress FACT complex subunit POB3
YPL158C	1.18708	0.000128569	0.000563578	21.027	35.878	10.637	14.963	No	AIM44	Protein that regulates Cdc42p and Rho1p; functions in the late steps of cytokinesis and cell separation; sustains Rho1p at the cell division site after actomyosin ring contraction; inhibits the activation of Cdc42-Cla4 at the cell division site to prevent budding inside the old bud neck; transcription is regulated by Swi5p; null mutant displays elevated frequency of mitochondrial genome loss; rel…
YMR299C	1.18257	7.74057e-07	6.08187e-06	88.287	105.16	33.59	53.328	No	DYN3	Dynein light intermediate chain (LIC); localizes with dynein, null mutant is defective in nuclear migration dynein light intermediate chain
YER092W	1.1825	1.42075e-07	1.33642e-06	286.06	406.26	136.663	174.591	No	IES5	Non-essential INO80 chromatin remodeling complex subunit; deletion affects telomere maintenance via recombination Ies5p
YMR264W	1.18182	1.01707e-16	4.42502e-15	348.735	341.738	144.077	165.986	No	CUE1	Ubiquitin-binding protein; ER membrane protein that recruits and integrates the ubiquitin-conjugating enzyme Ubc7p into ER membrane-bound ubiquitin ligase complexes that function in the ER-associated degradation (ERAD) pathway for misfolded proteins; contains a CUE domain that binds ubiquitin to facilitate intramolecular monoubiquitination and to promote diubiquitin elongation, facilitating polyu…
YIL101C	1.17962	4.29034e-11	7.73382e-10	67.004	60.274	31.617	25.513	Yes	XBP1	Transcriptional repressor; binds promoter sequences of cyclin genes, CYS3, and SMF2; not expressed during log phase of growth, but induced by stress or starvation during mitosis, and late in meiosis; represses 15% of all yeast genes as cells transition to quiescence; important for maintaining G1 arrest and for longevity of quiescent cells; member of Swi4p/Mbp1p family; phosphorylated by Cdc28p; r…
YEL071W	1.17513	1.37453e-07	1.29669e-06	313.873	451.136	187.446	157.882	No	DLD3	2-hydroxyglutarate transhydrogenase, and minor D-lactate dehydrogenase; converts D-2-hydroxyglutarate (D-2HG), an oncometabolite, to alpha-ketoglutarate in the presence of FAD, with concomitant reduction of pyruvate to D-lactate; minor lactate dehydrogenase activity; component of the retrograde regulon that consists of genes whose expression are stimulated by damage to mitochondria and reduced in…
YDL070W	1.1721	4.85234e-19	2.8009e-17	196.46	191.906	84.495	91.147	No	BDF2	Protein involved in transcription initiation; acts at TATA-containing promoters; associates with the basal transcription factor TFIID; contains two bromodomains; corresponds to the C-terminal region of mammalian TAF1; redundant with Bdf1p; protein abundance increases in response to DNA replication stress; BDF2 has a paralog, BDF1, that arose from the whole genome duplication Bdf2p
YGR023W	1.17054	8.40217e-06	5.04476e-05	44.53	47.62	26.335	15.364	No	MTL1	Putative plasma membrane sensor; involved in cell integrity signaling and stress response during glucose starvation and oxidative stress; has structural and functional similarity to Mid2p; MTL1 has a paralog, MID2, that arose from the whole genome duplication Mtl1p
YDL024C	1.16892	1.22985e-05	7.1131e-05	14.079	13.498	6.213	6.27	No	DIA3	hypothetical protein; involved in invasive and pseudohyphal growth putative acid phosphatase DIA3
YML088W	1.16784	9.18212e-10	1.29869e-08	39.304	32.716	15.71	16.875	No	UFO1	F-box receptor protein; subunit of the Skp1-Cdc53-F-box receptor (SCF) E3 ubiquitin ligase complex; binds to phosphorylated Ho endonuclease, allowing its ubiquitination by SCF and subsequent degradation SCF ubiquitin ligase complex subunit UFO1
YLR259C	1.16602	3.71835e-10	5.63064e-09	650.505	751.256	343.998	292.274	No	HSP60	Tetradecameric mitochondrial chaperonin; required for ATP-dependent folding of precursor polypeptides and complex assembly; prevents aggregation and mediates protein refolding after heat shock; role in mtDNA transmission; phosphorylated chaperone ATPase HSP60
YGL035C	1.16419	1.11615e-08	1.28346e-07	47.057	55.571	26.396	20.333	Yes	MIG1	Transcription factor involved in glucose repression; sequence specific DNA binding protein containing two Cys2His2 zinc finger motifs; regulated by the SNF1 kinase and the GLC7 phosphatase; regulates filamentous growth along with Mig2p in response to glucose depletion; activated in stochastic pulses of nuclear localization, shuttling between cytosol and nucleus depending on external glucose level…
YML112W	1.16276	2.25879e-14	7.00465e-13	64.702	66.849	28.431	31.461	No	CTK3	Gamma subunit of C-terminal domain kinase I; CTDK-I phosphorylates RNA polymerase II subunit Rpo21p to affect transcription and pre-mRNA 3' end processing, and also phosphorylates ribosomal protein Rps2p to increase translational fidelity; protein abundance increases in response to DNA replication stress Ctk3p
YMR225C	1.1616	1.24845e-11	2.48412e-10	482.785	386.682	189.125	206.585	No	MRPL44	Mitochondrial ribosomal protein of the large subunit; protein abundance increases in response to DNA replication stress mitochondrial 54S ribosomal protein YmL44
YMR037C	1.15987	1.49816e-15	5.63501e-14	69.623	67.964	31.31	31.461	Yes	MSN2	Stress-responsive transcriptional activator; activated in stochastic pulses of nuclear localization in response to various stress conditions; binds DNA at stress response elements of responsive genes; relative distribution to nucleus increases upon DNA replication stress stress-responsive transcriptional activator MSN2
YMR228W	1.15739	4.57966e-11	8.16495e-10	41.189	37.604	16.948	18.932	No	MTF1	Mitochondrial RNA polymerase specificity factor; has structural similarity to S-adenosylmethionine-dependent methyltransferases and functional similarity to bacterial sigma-factors; Mtf1p interacts with and stabilizes the Rpo41p-promoter complex, enhancing DNA bending and melting to facilitate pre-initiation open complex formation RNA polymerase specificity factor
YKL163W	1.15698	1.91732e-06	1.36817e-05	68.91	78.291	41.335	25.869	No	PIR3	O-glycosylated covalently-bound cell wall protein; required for cell wall stability; expression is cell cycle regulated, peaking in M/G1 and also subject to regulation by the cell integrity pathway; coding sequence contains length polymorphisms in different strains; PIR3 has a paralog, HSP150, that arose from the whole genome duplication beta-1,3-glucan linked protein
YOR054C	1.15491	3.9733e-08	4.19644e-07	77.834	110.474	41.813	44.534	No	VHS3	Negative regulatory subunit of protein phosphatase 1 Ppz1p; involved in coenzyme A biosynthesis; subunit of the phosphopantothenoylcysteine decarboxylase (PPCDC; Cab3p, Sis2p, Vhs3p) complex and the CoA-Synthesizing Protein Complex (CoA-SPC: Cab2p, Cab3p, Cab4p, Cab5p, Sis2p and Vhs3p) phosphopantothenoylcysteine decarboxylase complex subunit VHS3
YGR225W	1.15103	0.00772421	0.0198905	6.551	5.731	3.088	2.624	No	AMA1	Activator of meiotic anaphase promoting complex (APC/C); Cdc20p family member; required for initiation of spore wall assembly; required for Clb1p degradation during meiosis; prevents premature assembly of the meiosis I spindle, required for DSB induced prophase I arrest Ama1p
YML118W	1.15099	9.60285e-08	9.47205e-07	35.525	48.648	18.578	20.088	No	NGL3	3'-5' exonuclease specific for poly-A RNAs; has a domain similar to a magnesium-dependent endonuclease motif in mRNA deadenylase Ccr4p; similar to Ngl1p; NGL3 has a paralog, NGL2, that arose from the whole genome duplication 3'-5' poly(A) RNA exonuclease
YMR161W	1.14794	6.20768e-17	2.76266e-15	150.656	158.375	68.724	73.416	No	HLJ1	Co-chaperone for Hsp40p; anchored in the ER membrane; with its homolog Ydj1p promotes ER-associated protein degradation (ERAD) of integral membrane substrates; similar to E. coli DnaJ type I HSP40 co-chaperone HLJ1
YMR105C	1.14529	4.45375e-06	2.9107e-05	1523.28	1615.48	846.975	597.11	No	PGM2	Phosphoglucomutase; catalyzes the conversion from glucose-1-phosphate to glucose-6-phosphate, which is a key step in hexose metabolism; functions as the acceptor for a Glc-phosphotransferase; protein abundance increases in response to DNA replication stress; PGM2 has a paralog, PGM1, that arose from the whole genome duplication phosphoglucomutase PGM2
YGR280C	1.14443	2.53727e-14	7.82661e-13	65.201	68.4	31.445	30.116	No	PXR1	Essential protein involved in rRNA and snoRNA maturation; competes with TLC1 RNA for binding to Est2p, suggesting a role in negative regulation of telomerase; human homolog inhibits telomerase; contains a G-patch RNA interacting domain telomerase inhibitor
YFL013C	1.14429	5.08662e-11	9.01368e-10	40.588	46.195	19.877	20.222	No	IES1	Subunit of the INO80 chromatin remodeling complex; relocalizes to the cytosol in response to hypoxia Ies1p
YMR218C	1.14379	7.97644e-08	7.99015e-07	34.648	34.665	13.321	18.61	No	TRS130	Component of transport protein particle (TRAPP) complex II; TRAPPII is a multimeric guanine nucleotide-exchange factor for the GTPase Ypt1p, regulating intra-Golgi and endosome-Golgi traffic transport protein particle complex II subunit TRS130
YML007W	1.14209	1.39129e-12	3.27065e-11	112.217	131.903	57.817	55.051	Yes	YAP1	Basic leucine zipper (bZIP) transcription factor; required for oxidative stress tolerance; activated by H2O2 through the multistep formation of disulfide bonds and transit from the cytoplasm to the nucleus; Yap1p is degraded in the nucleus after the oxidative stress has passed; mediates resistance to cadmium; relative distribution to the nucleus increases upon DNA replication stress; YAP1 has a p…
YNL190W	1.14149	4.19905e-05	0.000211769	738.73	715.146	424.266	245.805	No	YNL190W	Hydrophilin essential in desiccation-rehydration process; cell wall protein; contains a putative GPI-attachment site hypothetical protein
YJR049C	1.14147	1.47382e-11	2.89305e-10	66.821	80.055	34.337	33.573	No	UTR1	ATP-NADH kinase; phosphorylates both NAD and NADH; active as a hexamer; enhances the activity of ferric reductase (Fre1p); UTR1 has a paralog, YEF1, that arose from the whole genome duplication NADH/NAD(+) kinase
YER121W	1.13952	0.000146117	0.000627291	22.688	30.971	9.154	15.742	No	YER121W	hypothetical protein; may be involved in phosphatase regulation and/or generation of precursor metabolites and energy hypothetical protein
YDR261W-B	1.13933	2.67682e-09	3.4757e-08	68.563	67.828	26.482	36.552	No	YDR261W-B	Retrotransposon TYA Gag and TYB Pol genes; transcribed/translated as one unit; polyprotein is processed to make a nucleocapsid-like protein (Gag), reverse transcriptase (RT), protease (PR), and integrase (IN); similar to retroviral genes gag-pol fusion protein
YMR185W	1.13888	0.000102196	0.000463298	13.417	12.169	5.122	6.681	No	RTP1	Protein required for the nuclear import and biogenesis of RNA pol II; conflicting evidence on whether null mutant is viable with elongated buds, or inviable; interacts with Rpb2, Rpb3, Nup116p, Nup100p and components of the R2TP complex (Rvb1p, Rvb2p, Pih1p); similar to human TMCO7 gene Rtp1p
YPR143W	1.13828	1.93342e-10	3.08818e-09	33.701	36.004	16.397	15.964	No	RRP15	Nucleolar protein; constituent of pre-60S ribosomal particles; required for proper processing of the 27S pre-rRNA at the A3 and B1 sites to yield mature 5.8S and 25S rRNAs Rrp15p
YOL031C	1.13687	0.000193287	0.000801469	176.838	114.081	47.781	87.012	No	SIL1	Nucleotide exchange factor for the ER lumenal Hsp70 chaperone Kar2p; required for protein translocation into the endoplasmic reticulum (ER); homolog of Yarrowia lipolytica SLS1; GrpE-like protein Sil1p
YPR185W	1.13585	5.19697e-08	5.35307e-07	33.935	38.505	18.97	14.719	No	ATG13	Regulatory subunit of the Atg1p signaling complex; stimulates Atg1p kinase activity; required for vesicle formation during autophagy and the cytoplasm-to-vacuole targeting (Cvt) pathway; contains a HORMA domain required for autophagy and for recruitment of the phosphatidylinositol 3-kinase complex subunit Atg14p to the pre-autophagosomal structure serine/threonine protein kinase regulatory subuni…
YOR077W	1.13473	0.000149167	0.000638038	12.225	12.877	6.63	5.047	No	RTS2	Basic zinc-finger protein; similar to human and mouse Kin17 proteins which are chromatin-associated proteins involved in UV response and DNA replication Rts2p
YML035C	1.13359	1.23399e-12	2.92446e-11	55.187	52.236	26.053	23.823	No	AMD1	AMP deaminase; tetrameric enzyme that catalyzes the deamination of AMP to form IMP and ammonia; thought to be involved in regulation of intracellular purine (adenine, guanine, and inosine) nucleotide pools AMP deaminase
YMR152W	1.13166	7.70051e-14	2.16879e-12	200.789	234.435	102.301	100.096	No	YIM1	hypothetical protein; null mutant displays sensitivity to DNA damaging agents; may have a role in lipid metabolism, based on localization to lipid droplets; the authentic, non-tagged protein is detected in highly purified mitochondria in high-throughput studies; protein abundance increases in response to DNA replication stress Yim1p
YJL161W	1.13013	1.53033e-12	3.58307e-11	164.755	194.126	79.238	87.901	No	FMP33	hypothetical protein; the authentic, non-tagged protein is detected in highly purified mitochondria in high-throughput studies Fmp33p
YDR146C	1.12973	4.32208e-05	0.000217409	26.885	39.94	12.708	18.532	Yes	SWI5	Transcription factor that recruits Mediator and Swi/Snf complexes; activates transcription of genes expressed at the M/G1 phase boundary and in G1 phase; required for expression of the HO gene controlling mating type switching; localization to nucleus occurs during G1 and appears to be regulated by phosphorylation by Cdc28p kinase; SWI5 has a paralog, ACE2, that arose from the whole genome duplic…
YLR216C	1.12969	8.83627e-09	1.03653e-07	614.94	724.212	342.76	280.568	No	CPR6	Peptidyl-prolyl cis-trans isomerase (cyclophilin); catalyzes the cis-trans isomerization of peptide bonds N-terminal to proline residues; plays a role in determining prion variants; binds to Hsp82p and contributes to chaperone activity; protein abundance increases in response to DNA replication stress peptidylprolyl isomerase CPR6
YPL186C	1.1287	1.42399e-09	1.94423e-08	172.946	214.809	98.662	82.098	No	UIP4	Protein that interacts with Ulp1p; a Ubl (ubiquitin-like protein)-specific protease for Smt3p protein conjugates; detected in a phosphorylated state in the mitochondrial outer membrane; also detected in ER and nuclear envelope Uip4p
YMR160W	1.12629	3.42356e-11	6.29633e-10	53.21	62.892	27.132	27.136	No	YMR160W	hypothetical protein; green fluorescent protein (GFP)-fusion protein localizes to the membrane of the vacuole; mutant has enhanced sensitivity to overexpression of mutant huntingtin; YMR160W is not an essential gene; relative distribution within the vacuolar membrane changes upon DNA replication stress hypothetical protein
YKL028W	1.12578	2.50307e-11	4.70738e-10	65.527	63.125	26.752	33.228	No	TFA1	TFIIE large subunit; involved in recruitment of RNA polymerase II to the promoter, activation of TFIIH, and promoter opening transcription factor TFIIE subunit TFA1
YMR304W	1.12397	3.0521e-09	3.90213e-08	62.288	76.128	35.342	29.471	No	UBP15	Ubiquitin-specific protease involved in protein deubiquitination; forms a complex with AAA peroxins Pex1p and Pex6p; deubiquitinates mono- and polyubiquitinated forms of Pex5p; deubiquitinates Clb5p, counteracting APC activity, and facilitating both Clb5p accumulation and S phase entry; physically interacts with anaphase-promoting complex/cyclosome (APC/C) activator, Cdh1p; catalytic activity reg…
YMR113W	1.12353	1.50742e-11	2.94909e-10	50.867	48.328	21.396	24.98	No	FOL3	Dihydrofolate synthetase, involved in folic acid biosynthesis; catalyzes conversion of dihydropteroate to dihydrofolate in folate coenzyme biosynthesis; FOL3 has a paralog, RMA1, that arose from the whole genome duplication dihydrofolate synthase
YGR169C-A	1.12248	5.88913e-09	7.13797e-08	113.318	119.87	45.808	63.388	No	LSO2	Protein with a potential role in response to iron deprivation; localizes to nucleus and cytoplasm, and nuclear localization is enhanced under iron-replete conditions; null mutant exhibits slow growth during iron deprivation; LSO2 has a paralog, LSO1, that arose from the whole genome duplication Lso2p
YDR295C	1.12242	2.08695e-07	1.87471e-06	24.053	28.954	11.568	13.296	No	HDA2	Subunit of the HDA1 histone deacetylase complex; possibly tetrameric trichostatin A-sensitive class II histone deacetylase complex contains Hda1p homodimer and an Hda2p-Hda3p heterodimer; involved in telomere maintenance; relocalizes to the cytosol in response to hypoxia Hda2p
YML113W	1.1211	2.288e-05	0.000122941	36.482	23.165	14.804	13.007	No	DAT1	DNA binding protein that recognizes oligo(dA).oligo(dT) tracts; Arg side chain in its N-terminal pentad Gly-Arg-Lys-Pro-Gly repeat is required for DNA-binding; relocalizes to the cytosol in response to hypoxia; not essential for viability Dat1p
YMR285C	1.11765	1.55593e-11	3.02369e-10	52.874	57.016	23.896	27.703	No	NGL2	Protein involved in 5.8S rRNA processing; Ccr4p-like RNase required for correct 3'-end formation of 5.8S rRNA at site E; similar to Ngl1p; NGL2 has a paralog, NGL3, that arose from the whole genome duplication RNA exonuclease
YMR190C	1.11377	1.86138e-06	1.33315e-05	18.134	20.208	8.468	9.605	No	SGS1	RecQ family nucleolar DNA helicase; role in genome integrity maintenance, chromosome synapsis, meiotic joint molecule/crossover formation; stimulates activity of Top3p; rapidly lost in response to rapamycin in Rrd1p-dependent manner; forms nuclear foci upon DNA replication stress; yeast SGS1 complements mutations in human homolog BLM implicated in Bloom syndrome; also similar to human WRN implica…
YNL007C	1.11264	1.76722e-09	2.37393e-08	823.329	980.348	439.51	410.346	No	SIS1	Type II HSP40 co-chaperone that interacts with the HSP70 protein Ssa1p; shuttles between cytosol and nucleus; mediates delivery of misfolded proteins into the nucleus for degradation; involved in proteasomal degradation of misfolded cytosolic proteins; protein abundance increases in response to DNA replication stress; polyQ aggregates sequester Sis1p and interfere with clearance of misfolded prot…
YMR253C	1.11255	1.77575e-14	5.62641e-13	75.919	75.1	34.227	36.886	No	YMR253C	hypothetical protein; green fluorescent protein (GFP)-fusion protein localizes to the cytoplasm in a punctate pattern; YMR253C is not an essential gene hypothetical protein
YLR178C	1.10938	7.50715e-07	5.93044e-06	1113.35	1486.72	620.106	608.383	No	TFS1	Inhibitor of carboxypeptidase Y (Prc1p), and Ras GAP (Ira2p); phosphatidylethanolamine-binding protein (PEBP) family member and ortholog of hPEBP1/RKIP, a natural metastasis suppressor; targets to vacuolar membranes during stationary phase; acetylated by NatB N-terminal acetyltransferase; protein abundance increases in response to DNA replication stress Tfs1p
YMR098C	1.10933	8.76429e-13	2.1114e-11	54.076	55.203	24.742	26.925	No	ATP25	Mitochondrial protein required for the stability of Oli1p (Atp9p) mRNA; also required for the Oli1p ring formation; YMR098C is not an essential gene Atp25p
YMR128W	1.10812	0.0010434	0.00351416	17.849	10.909	5.858	7.704	No	ECM16	Essential DEAH-box ATP-dependent RNA helicase specific to U3 snoRNP; predominantly nucleolar in distribution; required for 18S rRNA synthesis ATP-dependent RNA helicase ECM16
YML066C	1.10225	2.87787e-10	4.43862e-09	48.167	40.968	20.686	21.511	No	SMA2	Meiosis-specific prospore membrane protein; required to produce bending force necessary for proper assembly of the prospore membrane during sporulation Sma2p
YGR248W	1.10097	1.44405e-11	2.85383e-10	506.125	555.772	267.971	236.367	No	SOL4	6-phosphogluconolactonase; protein abundance increases in response to DNA replication stress; SOL4 has a paralog, SOL3, that arose from the whole genome duplication 6-phosphogluconolactonase SOL4
YMR076C	1.09928	0.000166245	0.000700294	11.767	15.486	6.519	6.47	No	PDS5	Cohesion maintenance factor; involved in sister chromatid condensation and cohesion; colocalizes with cohesin on chromosomes; performs its cohesin maintenance function in pre-anaphase cells by protecting the integrity of the cohesion complex; also required during meiosis; relocalizes to the cytosol in response to hypoxia Pds5p
YMR125W	1.09853	1.93565e-08	2.14949e-07	63.785	63.542	25.208	35.296	No	STO1	Large subunit of the nuclear mRNA cap-binding protein complex; interacts with Npl3p to carry nuclear poly(A)+ mRNA to cytoplasm; also involved in nuclear mRNA degradation and telomere maintenance; orthologous to mammalian CBP80 Sto1p
YML013W	1.09651	8.89651e-13	2.13443e-11	117.301	125.659	61.359	54.439	No	UBX2	Bridging factor involved in ER-associated protein degradation (ERAD); bridges the cytosolic Cdc48p-Npl1p-Ufd1p ATPase complex and the membrane associated Ssm4p and Hrd1p ubiquitin ligase complexes; contains a UBX (ubiquitin regulatory X) domain and a ubiquitin-associated (UBA) domain; redistributes from the ER to lipid droplets during the diauxic shift and stationary phase; required for the maint…
YML115C	1.09445	1.24296e-13	3.4672e-12	92.983	85.97	40.673	44.634	No	VAN1	Component of the mannan polymerase I; complex contains Van1p and Mnn9p and is involved in the first steps of mannan synthesis; mutants are vanadate-resistant Van1p
YMR117C	1.09373	2.86454e-08	3.09264e-07	27.313	31.359	13.823	14.185	No	SPC24	Component of the kinetochore-associated Ndc80 complex; involved in chromosome segregation, spindle checkpoint activity, and kinetochore clustering; evolutionarily conserved; other members include Ndc80p, Nuf2p, Spc24p, and Spc25p kinetochore-associated Ndc80 complex subunit SPC24
YMR207C	1.09299	0.000153737	0.000654225	11.4	12.751	5.49	6.125	No	HFA1	Mitochondrial acetyl-coenzyme A carboxylase; catalyzes production of malonyl-CoA in mitochondrial fatty acid biosynthesis; relocalizes from mitochondrion to cytoplasm upon DNA replication stress; genetic and comparative analysis suggests that translation begins at a non-canonical (Ile) start codon at -372 relative to the annotated start codon acetyl-CoA carboxylase HFA1
YIL135C	1.09278	5.40019e-10	7.91033e-09	61.065	64.706	33.259	26.87	No	VHS2	Regulator of septin dynamics; involved in the regulation of septin dynamics at bud neck after mitotic entry, likely by stabilizing septin structure; regulated at post-translational level by cell cycle dependent phosphorylation; likely phosphorylated by Cdc28p and dephosphorylated by Cdc14p before cytokinesis; high-copy suppressor of synthetic lethality of sis2 sit4 double mutant; VHS2 has a paral…
YML041C	1.09158	1.48413e-09	2.02161e-08	52.11	57.074	23.124	29.171	No	VPS71	Nucleosome-binding component of the SWR1 complex; SWR1 exchanges histone variant H2AZ (Htz1p) for chromatin-bound histone H2A; required for vacuolar protein sorting Vps71p
YER133W	1.09106	6.76006e-14	1.94144e-12	236.487	269.101	117.092	124.865	No	GLC7	Type 1 S/T protein phosphatase (PP1) catalytic subunit; involved in glycogen metabolism, sporulation and mitotic progression; interacts with multiple regulatory subunits; regulates actomyosin ring formation; subunit of CPF; recruited to mating projections by Afr1p interaction; regulates nucleocytoplasmic shuttling of Hxk2p; import into the nucleus is inhibited during spindle assembly checkpoint a…
YDL124W	1.08932	1.56768e-07	1.45534e-06	2182.89	2558.91	1127.32	1143.94	No	YDL124W	NADPH-dependent alpha-keto amide reductase; reduces aromatic alpha-keto amides, aliphatic alpha-keto esters, and aromatic alpha-keto esters; member of the aldo-keto reductase (AKR) family; protein abundance increases in response to DNA replication stress aldo-keto reductase superfamily protein
YMR287C	1.08766	4.84632e-07	4.01336e-06	21.557	21.333	9.571	10.917	No	DSS1	3'-5' exoribonuclease; component of the mitochondrial degradosome along with the ATP-dependent RNA helicase Suv3p; the degradosome associates with the ribosome and mediates turnover of aberrant or unprocessed RNAs Dss1p
YDR310C	1.08763	7.04933e-09	8.40442e-08	38.01	43.247	17.745	21.278	Yes	SUM1	Transcriptional repressor that regulates middle-sporulation genes; required for mitotic repression of middle sporulation-specific genes; also acts as general replication initiation factor; involved in telomere maintenance, chromatin silencing; regulated by pachytene checkpoint Sum1p
YGL005C	1.08753	3.77773e-06	2.52414e-05	103.201	126.619	43.442	66.89	No	COG7	Component of the conserved oligomeric Golgi complex; a cytosolic tethering complex (Cog1p through Cog8p) that functions in protein trafficking to mediate fusion of transport vesicles to Golgi compartments Golgi transport complex subunit COG7
YMR134W	1.08553	2.79021e-09	3.59094e-08	48.952	59.557	24.411	27.703	No	ERG29	hypothetical protein involved in ergosterol biosynthesis; conditional mutants produce less ergosterol, display impaired oxygen consumption, respiratory growth, mitochondrial iron utilization, and are more sensitive to oxidative stress; mutant bm-8 has a growth defect on iron-limited medium that is complemented by overexpression of Yfh1p; protein localizes to the cytoplasm, ER and nuclear envelope…
YBL033C	1.08524	1.18276e-12	2.81448e-11	160.833	178.835	76.113	87.112	No	RIB1	GTP cyclohydrolase II; catalyzes the first step of the riboflavin biosynthesis pathway GTP cyclohydrolase II
YER037W	1.08483	6.57247e-07	5.24897e-06	105.575	155.844	62.719	63.01	No	PHM8	Lysophosphatidic acid (LPA) phosphatase, nucleotidase; principle and physiological nucleotidase working on GMP, UMP and CMP; involved in LPA hydrolysis in response to phosphate starvation and ribose salvage pathway; phosphatase activity is soluble and Mg2+ dependent; expression is induced by low phosphate levels and by inactivation of Pho85p; repressed by Gcn4p under normal conditions; PHM8 has a…
YMR198W	1.0848	4.7537e-06	3.06233e-05	28.75	40.396	15.012	18.31	No	CIK1	Kinesin-associated protein; required for both karyogamy and mitotic spindle organization, interacts stably and specifically with Kar3p and may function to target this kinesin to a specific cellular role; locus encodes a long and short transcript with differing functions; CIK1 has a paralog, VIK1, that arose from the whole genome duplication Cik1p
YOR374W	1.08413	3.84682e-07	3.259e-06	491.577	687.879	283.608	283.703	No	ALD4	Mitochondrial aldehyde dehydrogenase; required for growth on ethanol and conversion of acetaldehyde to acetate; phosphorylated; activity is K+ dependent; utilizes NADP+ or NAD+ equally as coenzymes; expression is glucose repressed; can substitute for cytosolic NADP-dependent aldehyde dehydrogenase when directed to the cytosol; human homolog ALDH2 can complement yeast ald4 mutant aldehyde dehydrog…
YFR033C	1.08193	4.68474e-14	1.3656e-12	636.161	624.443	308.092	298.466	No	QCR6	Subunit 6 of the ubiquinol cytochrome-c reductase complex; the complex, also known as the cytochrome bc(1) complex or Complex III, is a component of the mitochondrial inner membrane electron transport chain; highly acidic protein; required for maturation of cytochrome c1; may be loosely associated with the complex since it is easily released into the intermembrane space ubiquinol--cytochrome-c re…
YOR123C	1.08168	4.98282e-07	4.11471e-06	82.317	98.081	35.71	51.238	No	LEO1	Component of the Paf1 complex; which associates with RNA polymerase II and is involved in histone methylation; plays a role in regulating Ty1 transposition; involved in transcription elongation as demonstrated by the G-less-based run-on (GLRO) assay Leo1p
YBR016W	1.08116	1.48558e-13	4.1047e-12	291.256	332.885	147.582	153.035	No	YBR016W	Tail-anchored plasma membrane protein with a conserved CYSTM module; predicted to be palmitoylated; has similarity to hydrophilins, which are involved in the adaptive response to hyperosmotic conditions; YBR016W has a paralog, YDL012C, that arose from the whole genome duplication hypothetical protein
YML050W	1.07827	1.28493e-07	1.22205e-06	40.425	34.617	20.183	15.964	No	AIM32	hypothetical protein; null mutant is viable and displays elevated frequency of mitochondrial genome loss Aim32p
YML012W	1.07715	1.05658e-10	1.80642e-09	1006.69	889.442	461.299	453.825	No	ERV25	Member of the p24 family involved in ER to Golgi transport; role in misfolded protein quality control; forms a heterotrimeric complex with Erp1, Erp2p, and Emp24 Erv25p
YBL078C	1.07676	7.92181e-05	0.000370362	224.089	405.193	155.535	148.866	No	ATG8	Component of autophagosomes and Cvt vesicles; regulator of Atg1p, targets it to autophagosomes; binds the Atg1p-Atg13p complex, triggering its vacuolar degradation; unique ubiquitin-like protein whose conjugation target is lipid phosphatidylethanolamine (PE); Atg8p-PE is anchored to membranes, is involved in phagophore expansion, and may mediate membrane fusion during autophagosome formation; dec…
YNR018W	1.07478	7.64251e-12	1.59128e-10	150.951	126.871	64.765	69.469	No	RCF2	Cytochrome c oxidase subunit; has a role in assembly of respiratory supercomplexes; similar to Rcf1p, and either Rcf1p or Rcf2p is required for late-stage assembly of the Cox12p and Cox13p subunits and for cytochrome c oxidase activity; associates with the cytochrome c oxidase - cytochrome bc1 supercomplex; null mutant accumulates reactive oxygen species; member of the conserved hypoxia induced g…
YMR024W	1.07425	1.1983e-10	2.00174e-09	109.039	89.771	45.82	50.259	No	MRPL3	Mitochondrial ribosomal protein of the large subunit; located in close proximity to the polypeptide exit channel of the ribosome; mutations in human homolog MRPL44 cause childhood cardiomyopathy; human MRPL44 deficiency results in inefficient assembly of the mitochondrial ribosome, and in tissue-specific respiratory chain deficiency, manifesting as either Complex I+Complex IV or Complex IV defici…
YHR158C	1.07179	4.45841e-06	2.9107e-05	19.428	23.66	9.73	11.195	No	KEL1	Protein required for proper cell fusion and cell morphology; forms a complex with Bud14p and Kel2p that regulates Bnr1p (formin) to affect actin cable assembly, cytokinesis, and polarized growth; functions in a complex with Kel2p to negatively regulate mitotic exit, interacts with Tem1p and Lte1p; localizes to regions of polarized growth; potential Cdc28p substrate Kel1p
YMR215W	1.07102	5.75161e-11	1.00395e-09	143.035	158.103	78.993	67.057	No	GAS3	Putative 1,3-beta-glucanosyltransferase; has similarity go other GAS family members; low abundance, possibly inactive member of the GAS family of GPI-containing proteins; localizes to the cell wall; mRNA induced during sporulation putative 1,3-beta-glucanosyltransferase
YDL020C	1.07075	7.61382e-09	8.96738e-08	171.693	226.183	99.495	93.66	Yes	RPN4	Transcription factor that stimulates expression of proteasome genes; Rpn4p levels are in turn regulated by the 26S proteasome in a negative feedback control mechanism; RPN4 is transcriptionally regulated by various stress responses; relative distribution to the nucleus increases upon DNA replication stress stress-regulated transcription factor RPN4
YML124C	1.07073	7.44573e-16	2.93302e-14	234.276	213.636	108.784	108.323	No	TUB3	Alpha-tubulin; associates with beta-tubulin (Tub2p) to form tubulin dimer, which polymerizes to form microtubules; expressed at lower level than Tub1p; TUB3 has a paralog, TUB1, that arose from the whole genome duplication alpha-tubulin TUB3
YMR283C	1.06996	1.1125e-08	1.2818e-07	44.775	53.234	21.629	25.958	No	RIT1	Initiator methionine 2'-O-ribosyl phosphate transferase; modifies the initiator methionine tRNA at position 64 to distinguish it from elongator methionine tRNA tRNA A64-2'-O-ribosylphosphate transferase
YOL064C	1.06814	0.000122734	0.000541256	152.999	284.955	106.161	107.011	No	MET22	Bisphosphate-3'-nucleotidase; involved in salt tolerance and methionine biogenesis; dephosphorylates 3'-phosphoadenosine-5'-phosphate and 3'-phosphoadenosine-5'-phosphosulfate, intermediates of the sulfate assimilation pathway; human homolog BPNT1 complements yeast null mutant 3'(2'),5'-bisphosphate nucleotidase
YBR095C	1.06648	3.65449e-09	4.56225e-08	31.674	33.715	15.71	16.142	No	RXT2	Component of the histone deacetylase Rpd3L complex; possibly involved in cell fusion and invasive growth; relocalizes to the cytosol in response to hypoxia Rxt2p
YML068W	1.06606	2.35123e-12	5.27219e-11	74.747	80.938	36.139	39.687	No	ITT1	Protein that modulates the efficiency of translation termination; interacts with translation release factors eRF1 (Sup45p) and eRF3 (Sup35p) in vitro, contains a zinc finger domain characteristic of the TRIAD class of proteins Itt1p
YDL065C	1.0645	4.14826e-07	3.49485e-06	56.98	73.239	27.45	36.052	No	PEX19	Chaperone and import receptor for newly-synthesized class I PMPs; binds peroxisomal membrane proteins (PMPs) in the cytoplasm and delivers them to the peroxisome for subsequent insertion into the peroxisomal membrane; interacts with Myo2p and contributes to peroxisome partitioning Pex19p
YMR192W	1.06315	6.52806e-07	5.22783e-06	21.761	25.143	11.25	11.684	No	GYL1	Putative GTPase activating protein (GAP) with a role in exocytosis; stimulates Gyp5p GAP activity on Ypt1p, colocalizes with Gyp5p at sites of polarized growth; interacts with Gyp5p, Rvs161p, and Rvs167p; involved in recruiting Rvs167p to the bud tip during polarized growth; increases in abundance and relocalizes from bud neck to cytoplasm upon DNA replication stress; GYL1 has a paralog, GYP5, th…
YMR262W	1.0631	4.10802e-16	1.65171e-14	216.784	222.508	103.036	111.191	No	YMR262W	hypothetical protein; interacts weakly with Knr4p; YMR262W is not an essential gene putative endodeoxyribonuclease
YMR297W	1.06237	2.02741e-09	2.68632e-08	1400.12	1459.64	716.059	678.819	No	PRC1	Vacuolar carboxypeptidase Y (proteinase C, CPY); broad-specificity C-terminal exopeptidase involved in non-specific protein degradation in the vacuole; member of the serine carboxypeptidase family carboxypeptidase C PRC1
YHR146W	1.06124	1.24526e-08	1.41518e-07	93.299	120.713	53.932	50.704	No	CRP1	Protein that binds to cruciform DNA structures; CRP1 has a paralog, MDG1, that arose from the whole genome duplication Crp1p
YIL045W	1.06123	9.77235e-06	5.74323e-05	117.485	184.808	78.454	69.303	No	PIG2	Putative type-1 protein phosphatase targeting subunit; tethers Glc7p type-1 protein phosphatase to Gsy2p glycogen synthase; PIG2 has a paralog, GIP2, that arose from the whole genome duplication putative protein phosphatase regulator PIG2
YGL156W	1.06049	2.23335e-10	3.52857e-09	55.482	62.184	30.379	27.159	No	AMS1	Vacuolar alpha mannosidase; involved in free oligosaccharide (fOS) degradation; delivered to the vacuole in a novel pathway separate from the secretory pathway alpha-mannosidase
YOR195W	1.05944	0.00559356	0.0150002	6.704	8.853	3.811	3.824	No	SLK19	Kinetochore-associated protein; required for chromosome segregation and kinetochore clustering; required for normal segregation of chromosomes in meiosis and mitosis; component of the FEAR regulatory network, which promotes Cdc14p release from the nucleolus during anaphase; potential Cdc28p substrate Slk19p
YNL103W	1.05667	9.13942e-10	1.29642e-08	43.257	49.249	21.691	23.757	Yes	MET4	Leucine-zipper transcriptional activator; responsible for regulation of sulfur amino acid pathway; requires different combinations of auxiliary factors Cbf1p, Met28p, Met31p and Met32p; feedforward loop exists in the regulation of genes controlled by Met4p and Met32p; can be ubiquitinated by ubiquitin ligase SCF-Met30p, is either degraded or maintained in an inactive state; regulates degradation …
YLR180W	1.05555	0.000145027	0.000624453	491.658	787.308	357.356	269.707	No	SAM1	S-adenosylmethionine synthetase; catalyzes transfer of the adenosyl group of ATP to the sulfur atom of methionine; SAM1 has a paralog, SAM2, that arose from the whole genome duplication methionine adenosyltransferase SAM1
YLR205C	1.05512	7.12308e-06	4.36214e-05	22.107	29.769	12.23	13.318	No	HMX1	ER localized heme oxygenase; involved in heme degradation during iron starvation and in the oxidative stress response; expression is regulated by AFT1 and oxidative stress; relocates to the perinuclear region in the presence of oxidants Hmx1p
YOR178C	1.05449	1.60882e-09	2.17116e-08	145.277	132.65	75.746	60.465	No	GAC1	Regulatory subunit for Glc7p type-1 protein phosphatase (PP1); tethers Glc7p to Gsy2p glycogen synthase, binds Hsf1p heat shock transcription factor, required for induction of some HSF-regulated genes under heat shock; GAC1 has a paralog, PIG1, that arose from the whole genome duplication protein phosphatase regulator GAC1
YOL071W	1.05439	8.57774e-16	3.33388e-14	163.085	162.738	77.951	81.809	No	SDH5	Protein required for flavinylation of Sdh1p; binds to Sdh1p and promotes FAD cofactor attachment, which is necessary for succinate dehydrogenase (SDH) complex assembly and activity; mutations in human ortholog PGL2 are associated with neuroendocrine tumors (paraganglioma) succinate dehydrogenase assembly factor SDH5
YBR112C	1.05372	1.15957e-11	2.33921e-10	73.708	82.198	39.325	37.23	Yes	CYC8	General transcriptional co-repressor; acts together with Tup1p; also acts as part of a transcriptional co-activator complex that recruits the SWI/SNF and SAGA complexes to promoters; can form the prion [OCT+] transcription regulator CYC8
YDL005C	1.05345	2.00498e-09	2.66266e-08	47.026	56.085	24.583	26.025	No	MED2	Subunit of the RNA polymerase II mediator complex; associates with core polymerase subunits to form the RNA polymerase II holoenzyme; essential for transcriptional regulation; relocalizes to the cytosol in response to hypoxia Med2p
YOL162W	1.05287	0.00027919	0.00110426	15.954	24.28	10.833	8.971	No	YOL162W	hypothetical protein; member of the Dal5p subfamily of the major facilitator family hypothetical protein
YMR062C	1.05176	6.17831e-10	8.98243e-09	394.468	405.687	173.5	219.959	No	ARG7	Mitochondrial ornithine acetyltransferase; catalyzes the fifth step in arginine biosynthesis; also possesses acetylglutamate synthase activity, regenerates acetylglutamate while forming ornithine glutamate N-acetyltransferase
[truncated: 447 more rows]

## Sheet: S118L vs. WT
Gene ID	log2(Fold_change)	p-value	FDR p-value correction	mRNA expression level at Normal condition				YEASTRACT 2019 TF	Gene	Gene Function
				Spt15 mutant strain S118L		Wild type strain BY4741
				Duplicate#1	Duplicate#2	Duplicate#1	Duplicate#2
[truncated: 1,476 more rows]

## Sheet: L214V vs. WT
Gene ID	log2(Fold_change)	p-value	FDR p-value correction	mRNA expression level at Normal condition				YEASTRACT 2019 TF	Gene	Gene Function
[truncated: 101 more rows]
