# Supplementary material for: Stress tolerance enhancement via SPT15 base editing in Saccharomyces cerevisiae
Source: Biotechnol Biofuels. 2021 Jul 6;14:155. doi: 10.1186/s13068-021-02005-w (PMC8259078; doi:10.1186/s13068-021-02005-w)
Supplement: Supplementary file 7 — Additional file 7: Dataset S3. SDEG lists in the comparisons of Spt15 mutants vs. WT at thermal stress condition. [file 13068_2021_2005_MOESM7_ESM.xlsx]

## Sheet: A140G vs. WT
Gene ID	log2(Fold_change)	p-value	FDR p-value correction	mRNA expression level at thermal stress				YEASTRACT 2019 TF	Gene	Gene Function
				Spt15 mutant strain A140G		Wild type strain BY4741
				Duplicate#1	Duplicate#2	Duplicate#1	Duplicate#2
ETS1-1	12.3924	1.2646e-15	2.14141e-14	52.264	89.856	0	0	No	ETS1-1	- -
ETS1-2	12.3924	1.2646e-15	2.14141e-14	52.264	89.856	0	0	No	ETS1-2	- -
YBL112C	9.08946	2.71026e-06	1.79428e-05	3.569	10.799	0	0	No	YBL112C	hypothetical protein; YBL112C is contained within TEL02L hypothetical protein
YPR108W-A	8.80965	7.64708e-09	6.93564e-08	7.56	4.29	0	0	No	YPR108W-A	hypothetical protein; identified by fungal homology and RT-PCR hypothetical protein
YNL339C	6.27064	0.000454994	0.00190687	0.933	1.068	0	0.009	No	YRF1-6	Helicase encoded by the Y' element of subtelomeric regions; highly expressed in the mutants lacking the telomerase component TLC1; potentially phosphorylated by Cdc28p Y' element ATP-dependent helicase protein 1 copy 6
YHL048W	3.28237	4.8448e-93	2.02755e-90	82.737	93.375	8.914	9.811	No	COS8	Endosomal protein involved in turnover of plasma membrane proteins; member of the DUP380 subfamily of conserved, often subtelomeric COS genes; required for the multivesicular vesicle body sorting pathway that internalizes plasma membrane proteins for degradation; Cos proteins provide ubiquitin in trans for nonubiquitinated cargo proteins Cos8p
YKR073C	2.78283	1.62853e-06	1.1199e-05	5.686	4.652	1.188	0.404	No	YKR073C	hypothetical protein; conserved across S. cerevisiae strains hypothetical protein
YHR218W	2.77956	0.00231768	0.00808292	2.072	1.829	0.102	0.551	No	YHR218W	Helicase-like protein encoded within the telomeric Y' element hypothetical protein
YFL058W	2.63653	2.88299e-12	3.70427e-11	10.277	10.233	2.063	1.317	No	THI5	Protein involved in synthesis of the thiamine precursor HMP; member of a subtelomeric gene family including THI5, THI11, THI12, and THI13; hydroxymethylpyrimidine is also known as HMP 4-amino-5-hydroxymethyl-2-methylpyrimidine phosphate synthase
YMR321C	2.5913	7.39346e-10	7.57313e-09	8.116	8.264	1.783	1.059	No	YMR321C	hypothetical protein; proposed to be a palmitoylated membrane protein; YMR321C has a paralog, SAM4, that arose from a single-locus duplication hypothetical protein
YHL049C	2.57773	3.28305e-07	2.44725e-06	6.511	5.014	0.764	1.3	No	YHL049C	hypothetical protein
YNL332W	2.44153	1.92548e-11	2.27907e-10	11.264	9.397	2.131	1.764	No	THI12	Protein involved in synthesis of the thiamine precursor HMP; member of a subtelomeric gene family including THI5, THI11, THI12, and THI13; hydroxymethylpyrimidine is also known as HMP 4-amino-5-hydroxymethyl-2-methylpyrimidine phosphate synthase
YML100W	2.3958	5.41717e-162	1.05797e-158	533.568	498.733	102.822	100.123	No	TSL1	Large subunit of trehalose 6-phosphate synthase/phosphatase complex; Tps1p-Tps2p complex converts uridine-5'-diphosphoglucose and glucose 6-phosphate to trehalose; contributes to survival to acute lethal heat stress; mutant has aneuploidy tolerance; protein abundance increases in response to DNA replication stress; TSL1 has a paralog, TPS3, that arose from the whole genome duplication trehalose 6…
YFL066C	2.3784	0.00513071	0.0160154	1.408	2.349	0.212	0.559	No	YFL066C	Helicase-like protein encoded within the telomeric Y' element; induced by treatment with 8-methoxypsoralen and UVA irradiation; SWAT-GFP and mCherry fusion proteins localize to the nucleus Y' element ATP-dependent helicase
YJL007C	2.35902	0.000475627	0.00198342	7.73	2.934	0.416	1.687	No	YJL007C	hypothetical protein; conserved among S. cerevisiae strains hypothetical protein
YML130C	2.31943	5.88764e-136	6.89914e-133	573.179	516.756	114.41	111.5	No	ERO1	Thiol oxidase required for oxidative protein folding in the ER; essential for maintaining ER redox balance; feedback regulated via reduction and oxidation of regulatory bonds; reduced Pdi1p activates Ero1p by direct reduction of Ero1p regulatory bonds; depletion of thiol substrates and accumulation of oxidized Pdi1p results in inactivation of Ero1p by both Pdi1p-mediated oxidation and autonomous …
YML133C	2.28136	7.74722e-30	3.41285e-28	33.145	37.031	7.122	7.806	No	YML133C	Putative Y' element ATP-dependent helicase; the authentic, non-tagged protein is detected in highly purified mitochondria in high-throughput studies; YML133C contains an intron Y' element ATP-dependent helicase
YER181C	2.2567	0.000457804	0.00191591	4.896	2.275	0.773	0.783	No	YER181C	Mitochondrial hypothetical protein; conserved among S. cerevisiae strains; extensively overlaps a Ty1 LTR; YER181C is not an essential gene hypothetical protein
YBR302C	2.25447	3.76029e-46	3.55347e-44	59.878	57.487	12.997	12.47	No	COS2	Endosomal protein involved in turnover of plasma membrane proteins; member of the DUP380 subfamily of conserved, often subtelomeric COS genes; required for the multivesicular vesicle body sorting pathway that internalizes plasma membrane proteins for degradation; Cos proteins provide ubiquitin in trans for nonubiquitinated cargo proteins Cos2p
YML132W	2.25447	3.76029e-46	3.55347e-44	59.878	57.487	12.997	12.47	No	COS3	Endosomal protein involved in turnover of plasma membrane proteins; member of the DUP380 subfamily of conserved, often subtelomeric COS genes; required for the multivesicular vesicle body sorting pathway that internalizes plasma membrane proteins for degradation; Cos proteins provide ubiquitin in trans for nonubiquitinated cargo proteins Cos3p
YHL050C	2.24099	3.2332e-16	5.7404e-15	17.891	16.296	3.939	3.503	No	YHL050C	hypothetical protein; potential Cdc28p substrate hypothetical protein
YMR011W	2.16257	7.70992e-128	7.52874e-125	836.86	841.6	181.178	206.512	No	HXT2	High-affinity glucose transporter of the major facilitator superfamily; expression is induced by low levels of glucose and repressed by high levels of glucose hexose transporter HXT2
YMR184W	2.10724	1.68263e-127	1.40836e-124	338.616	340.824	82.779	80.346	No	ADD37	hypothetical protein; involved in ER-associated protein degradation; green fluorescent protein (GFP)-fusion protein localizes to the cytoplasm and is induced in response to the DNA-damaging agent MMS; YMR184W is not an essential gene; protein abundance increases in response to DNA replication stress Add37p
YHR094C	2.10466	2.17217e-43	1.74339e-41	255.045	265.129	51.08	74.047	No	HXT1	Low-affinity glucose transporter of the major facilitator superfamily; expression is induced by Hxk2p in the presence of glucose and repressed by Rgt1p when glucose is limiting; HXT1 has a paralog, HXT6, what arose from the whole genome duplication hexose transporter HXT1
YMR322C	2.00747	2.93263e-05	0.000161336	4.762	8.283	1.248	2.074	No	SNO4	Possible chaperone and cysteine protease; required for transcriptional reprogramming during the diauxic shift and for survival in stationary phase; similar to bacterial Hsp31 and yeast Hsp31p, Hsp32p, and Hsp33p; DJ-1/ThiJ/PfpI superfamily member; predicted involvement in pyridoxine metabolism; induced by mild heat stress and copper deprivation glutathione-independent methylglyoxalase family prot…
YDR077W	1.9149	1.49826e-178	8.77833e-175	14480.8	15150	4046.25	4078.5	No	SED1	Major stress-induced structural GPI-cell wall glycoprotein; associates with translating ribosomes, possible role in mitochondrial genome maintenance; ORF contains two distinct variable minisatellites; SED1 has a paralog, SPI1, that arose from the whole genome duplication Sed1p
YML034W	1.89969	4.37512e-62	8.5446e-60	130.787	125.661	34.942	36.137	No	SRC1	Inner nuclear membrane protein; highly enriched at telomeres and subtelomeric regions; functions in regulation of subtelomeric genes and is linked to TREX (transcription export) factors; SRC1 produces 2 splice variant proteins with different functions; alternative splicing of SRC1 pre-mRNA is promoted by Hub1p; mutant has aneuploidy tolerance; SEC1 has a paralog, HEH2, that arose from the whole g…
YMR305C	1.89436	6.6091e-121	4.84034e-118	1816.66	2004.77	542.464	520.169	No	SCW10	Cell wall protein with similarity to glucanases; may play a role in conjugation during mating based on mutant phenotype and its regulation by Ste12p; SWC10 has a paralog, SCW4, that arose from the whole genome duplication putative family 17 glucosidase
YML028W	1.87413	1.36817e-175	4.00805e-172	5334.17	5422.75	1505.09	1529.16	No	TSA1	Thioredoxin peroxidase; acts as both ribosome-associated and free cytoplasmic antioxidant; self-associates to form high-molecular weight chaperone complex under oxidative stress; chaperone activity essential for growth in zinc deficiency; required for telomere length maintenance; binds and modulates Cdc19p activity; protein abundance increases, forms cytoplasmic foci during DNA replication stress…
YMR041C	1.82058	4.86981e-58	7.94968e-56	124.258	128.298	36.003	37.875	No	ARA2	NAD-dependent arabinose dehydrogenase; involved in biosynthesis of dehydro-D-arabinono-1,4-lactone; similar to plant L-galactose dehydrogenase D-arabinose 1-dehydrogenase (NAD(P)(+)) ARA2
YMR214W	1.81681	9.83174e-88	3.84028e-85	262.982	271.954	79.748	77.257	No	SCJ1	One of several homologs of bacterial chaperone DnaJ; located in the ER lumen where it cooperates with Kar2p to mediate maturation of proteins Scj1p
YFL067W	1.81147	0.000235894	0.00106234	4.018	8.691	1.808	1.876	No	YFL067W	hypothetical protein; down-regulated at low calcium levels; mCherry fusion protein localizes to the vacuole hypothetical protein
YMR040W	1.80844	2.81161e-61	5.31394e-59	140.885	145.355	43.482	41.017	No	YET2	hypothetical protein that may interact with ribosomes; based on co-purification experiments; homolog of human BAP31 protein; YET2 has a paralog, YET1, that arose from the whole genome duplication Yet2p
YML052W	1.80677	5.67684e-99	2.77172e-96	390.961	407.568	115.199	120.804	No	SUR7	Plasma membrane protein, component of eisosomes; long-lived protein that remains stable in eisosomes of mother cells while other eisosome proteins, Pil1p and Lsp1p, turn over; may function to anchor the eisosome in place; sporulation and plasma membrane sphingolipid content are altered in mutants; localizes to furrow-like invaginations (MCC patches) Sur7p
YML058W	1.7999	5.86075e-120	3.81535e-117	2476.06	2494.21	705.441	770.65	No	SML1	Ribonucleotide reductase inhibitor; involved in regulating dNTP production; regulated by Mec1p and Rad53p during DNA damage and S phase; SML1 has a paralog, DIF1, that arose from the whole genome duplication ribonucleotide reductase inhibiting protein SML1
YJL034W	1.77911	6.92803e-109	4.05913e-106	1981.68	1900.45	609.334	560.429	No	KAR2	ATPase involved in protein import into the ER; also acts as a chaperone to mediate protein folding in the ER and may play a role in ER export of soluble proteins; regulates the unfolded protein response via interaction with Ire1p Hsp70 family ATPase KAR2
YMR147W	1.69101	5.47834e-28	2.19847e-26	53.888	52.379	17.615	16.42	No	YMR147W	hypothetical protein; SWAT-GFP and mCherry fusion proteins localize to the cell periphery hypothetical protein
YMR031C	1.68798	7.99037e-50	9.17952e-48	139.952	132.318	42.03	45.432	No	EIS1	Component of the eisosome required for proper eisosome assembly; similar to Uso1p; authentic, non-tagged protein is detected in a phosphorylated state in highly purified mitochondria in high-throughput studies; protein increases in abundance and relocalizes from plasma membrane to cytoplasm upon DNA replication stress; EIS1 has a paralog, YKL050C, that arose from the whole genome duplication Eis1p
YNL336W	1.6768	1.39053e-16	2.52234e-15	26.966	26.9	8.735	8.684	No	COS1	Endosomal protein involved in turnover of plasma membrane proteins; member of the DUP380 subfamily of conserved, often subtelomeric COS genes; required for the multivesicular vesicle body sorting pathway that internalizes plasma membrane proteins for degradation; Cos proteins provide ubiquitin in trans for nonubiquitinated cargo proteins Cos1p
YMR117C	1.66451	1.62543e-25	5.44192e-24	49.045	55.722	16.885	17.212	No	SPC24	Component of the kinetochore-associated Ndc80 complex; involved in chromosome segregation, spindle checkpoint activity, and kinetochore clustering; evolutionarily conserved; other members include Ndc80p, Nuf2p, Spc24p, and Spc25p kinetochore-associated Ndc80 complex subunit SPC24
YML053C	1.66312	1.46138e-48	1.5856e-46	163.582	187.474	58.788	55.733	No	YML053C	hypothetical protein; green fluorescent protein (GFP)-fusion protein localizes to the cytoplasm and the nucleus; overexpression causes a cell cycle delay or arrest; YML053C is not an essential gene hypothetical protein
YMR052W	1.65179	1.8745e-34	9.89432e-33	86.656	79.53	28.414	26.274	No	FAR3	hypothetical protein; involved in recovery from cell cycle arrest in response to pheromone, in a Far1p-independent pathway; interacts with Far7p, Far8p, Far9p, Far10p, and Far11p; localizes to the endoplasmic reticulum; protein abundance increases in response to DNA replication stress Far3p
YML129C	1.64955	3.78904e-74	1.16842e-71	730.277	675.213	220.942	242.485	No	COX14	Mitochondrial cytochrome c oxidase (complex IV) assembly factor; also involved in translational regulation of Cox1p and prevention of Cox1p aggregation before assembly; associates with complex IV assembly intermediates and complex III/complex IV supercomplexes; located in the mitochondrial membrane Cox14p
YBL113C	1.64728	1.01696e-11	1.24133e-10	21.317	18.172	6.74	6.282	No	YBL113C	Helicase-like protein encoded within the telomeric Y' element hypothetical protein
YEL076C	1.64411	0.0038719	0.0125612	6.95	2.619	1.63	1.566	No	YEL076C	hypothetical protein
YMR079W	1.63013	2.59707e-51	3.17005e-49	272.712	280.088	84.392	100.313	No	SEC14	Phosphatidylinositol/phosphatidylcholine transfer protein; involved in regulating PtdIns, PtdCho, and ceramide metabolism, products of which regulate intracellular transport and UPR; has a role in localization of lipid raft proteins; functionally homologous to mammalian PITPs; SEC14 has a paralog, YKL091C, that arose from the whole genome duplication phosphatidylinositol/phosphatidylcholine trans…
YOL031C	1.6054	4.09843e-49	4.53069e-47	142.893	154.696	49.382	51.714	No	SIL1	Nucleotide exchange factor for the ER lumenal Hsp70 chaperone Kar2p; required for protein translocation into the endoplasmic reticulum (ER); homolog of Yarrowia lipolytica SLS1; GrpE-like protein Sil1p
YMR291W	1.59067	6.40076e-51	7.65348e-49	141.198	148.113	49.357	49.924	No	TDA1	Protein kinase of unknown cellular role; green fluorescent protein (GFP)-fusion protein localizes to the cytoplasm and nucleus; null mutant is sensitive to expression of the top1-T722A allele; not an essential gene; relocalizes from nucleus to cytoplasm upon DNA replication stress protein kinase TDA1
YML120C	1.59002	7.77903e-50	9.11547e-48	160.165	169.256	53.975	59.089	No	NDI1	NADH:ubiquinone oxidoreductase; transfers electrons from NADH to ubiquinone in respiratory chain but does not pump protons, in contrast to higher eukaryotic multisubunit respiratory complex I; upon apoptotic stress, is activated in mitochondria by N-terminal cleavage, then translocates to cytoplasm to induce apoptosis; homolog of human AIFM2; yeast NDI1 complements several phenotypes of human cel…
YCL043C	1.57275	4.51372e-99	2.40417e-96	1700.29	1799.2	621.058	595.197	No	PDI1	Protein disulfide isomerase; multifunctional oxidoreductase of the ER lumen, essential for disulfide bond formation in secretory and cell-surface proteins, processing of non-native disulfide bonds; Ero1p activator; complexes with exomannosidase, Mnl1p to facilitate the recognition of misfolded glycoproteins and the trimming of glycan Man8GlcNAc2 to Man7GlcNAc2 on substrates, thereby accelerating …
YML093W	1.56914	2.20072e-31	1.01528e-29	96.996	85.352	30.816	32.815	No	UTP14	Subunit of U3-containing Small Subunit (SSU) processome complex; involved in production of 18S rRNA and assembly of small ribosomal subunit Utp14p
YCR106W	1.55571	0.0155703	0.0414118	2.412	2.219	0.781	0.861	Yes	RDS1	Putative zinc cluster transcription factor; involved in conferring resistance to cycloheximide Rds1p
YMR081C	1.55272	8.06199e-38	5.13426e-36	265.268	333.637	104.028	106.87	No	ISF1	Serine-rich, hydrophilic protein; overexpression suppresses growth defects of hap2, hap3, and hap4 mutants; expression is under glucose control; cotranscribed with NAM7 in a cyp1 mutant; ISF1 has a paralog, MBR1, that arose from the whole genome duplication Isf1p
YMR002W	1.54526	2.56567e-97	1.15633e-94	1050.4	1105.79	380.141	383.651	No	MIX17	Mitochondrial intermembrane space protein; required for normal oxygen consumption; contains twin cysteine-x9-cysteine motifs; protein abundance increases in response to DNA replication stress Mix17p
YMR233W	1.53317	1.43651e-19	3.42135e-18	42.463	41.85	14.024	16.111	No	TRI1	Non-essential sumoylated hypothetical protein; similar to components of human SWI/SNF complex including SMRD3; green fluorescent protein (GFP)-fusion protein localizes to the cytoplasm, nucleus and nucleolus; TRI1 has a paralog, UAF30, that arose from the whole genome duplication Tri1p
YML074C	1.5187	1.05976e-62	2.21754e-60	393.912	380.26	133.197	146.26	No	FPR3	Nucleolar peptidyl-prolyl cis-trans isomerase (PPIase); FK506 binding protein; affects expression of multiple genes via its role in nucleosome assembly; phosphorylated by casein kinase II (Cka1p-Cka2p-Ckb1p-Ckb2p) and dephosphorylated by Ptp1p; PPIase domain acts as a transcriptional repressor when tethered to DNA by lexA, and repressor activity is dependent on PPIase activity; FPR3 has a paralog…
YOL084W	1.51399	1.29903e-21	3.50737e-20	58.049	50.476	19.406	19.923	No	PHM7	hypothetical protein; expression is regulated by phosphate levels; green fluorescent protein (GFP)-fusion protein localizes to the cell periphery and vacuole; protein abundance increases in response to DNA replication stress Phm7p
YML055W	1.49957	2.32037e-64	5.03521e-62	287.213	293.589	108.671	103.66	No	SPC2	Subunit of signal peptidase complex; complex catalyzes cleavage of N-terminal signal sequences of proteins targeted to the secretory pathway; homologous to mammalian SPC25; other members of the complex are Spc1p, Spc1p, and Sec11p signal peptidase complex subunit SPC2
YER137C	1.49247	1.42151e-34	7.71168e-33	96.081	95.538	33.838	36.61	No	YER137C	hypothetical protein
YMR173W	1.4879	2.8102e-70	7.48407e-68	621.174	613.753	237.53	217.829	No	DDR48	DNA damage-responsive protein; expression is increased in response to heat-shock stress or treatments that produce DNA lesions; contains multiple repeats of the amino acid sequence NNNDSYGS; protein abundance increases in response to DNA replication stress DNA damage-responsive protein 48
YMR302C	1.48459	2.45695e-35	1.38416e-33	101.731	102.568	39.39	36.077	No	YME2	Integral inner mitochondrial membrane protein; role in maintaining mitochondrial nucleoid structure and number; mutants exhibit an increased rate of mitochondrial DNA escape; shows some sequence similarity to exonucleases Yme2p
YML128C	1.48412	2.94446e-53	4.2077e-51	330.258	352.515	133.146	119.16	No	MSC1	hypothetical protein; mutant is defective in directing meiotic recombination events to homologous chromatids; the authentic, non-tagged protein is detected in highly purified mitochondria and is phosphorylated Msc1p
YMR022W	1.48286	1.44283e-65	3.25136e-63	402.243	415.461	156.941	145.503	No	UBC7	Ubiquitin conjugating enzyme; involved in the ER-associated protein degradation (ERAD) pathway and in the inner nuclear membrane-associated degradation (INMAD) pathway; requires Cue1p for recruitment to the ER membrane; proposed to be involved in chromatin assembly E2 ubiquitin-conjugating protein UBC7
YMR295C	1.47851	1.14417e-77	3.94336e-75	1130.02	1168.6	408.877	444.057	No	YMR295C	hypothetical protein that associates with ribosomes; green fluorescent protein (GFP)-fusion protein localizes to the cell periphery and bud; not an essential gene; protein abundance increases in response to DNA replication stress; YMR295C has a paralog, YGR273C, that arose from the whole genome duplication hypothetical protein
YMR014W	1.47784	4.22009e-29	1.75358e-27	90.934	86.55	35.171	30.715	No	BUD22	Protein required for rRNA maturation and ribosomal subunit biogenesis; required for 18S rRNA maturation; also required for small ribosomal subunit biogenesis; cosediments with pre-ribosomal particles; mutation decreases efficiency of +1 Ty1 frameshifting and transposition, and affects budding pattern Bud22p
YML025C	1.47555	2.4596e-39	1.65641e-37	176.944	187.316	72.745	62.644	No	YML6	Mitochondrial ribosomal protein of the large subunit; has similarity to E. coli L4 ribosomal protein and human mitoribosomal MRP-L4 protein; essential for viability, unlike most other mitoribosomal proteins mitochondrial 54S ribosomal protein YmL6
YMR039C	1.46926	3.93421e-59	6.985e-57	239.862	245.908	91.752	89.615	No	SUB1	Transcriptional regulator; facilitates elongation through factors that modify RNAP II; role in peroxide resistance involving Rad2p; role in nonhomologous end-joining (NHEJ) of ds breaks in plasmid DNA, but not chromosomal DNA; role in the hyperosmotic stress response through polymerase recruitment at RNAP II and RNAP III genes; negatively regulates sporulation; protein abundance increases in resp…
YMR204C	1.46461	6.81917e-16	1.18909e-14	34.419	40.41	13.668	14.321	No	INP1	Peripheral membrane protein of peroxisomes; involved in peroxisomal inheritance; recruitment to peroxisomes is mediated by interaction with Pex3p at the peroxisomal membrane Inp1p
YMR215W	1.46254	5.98928e-43	4.55729e-41	149.35	161.698	57.005	59.675	No	GAS3	Putative 1,3-beta-glucanosyltransferase; has similarity go other GAS family members; low abundance, possibly inactive member of the GAS family of GPI-containing proteins; localizes to the cell wall; mRNA induced during sporulation putative 1,3-beta-glucanosyltransferase
YML054C	1.45714	4.10008e-27	1.53009e-25	71.465	69.084	27.369	25.612	No	CYB2	Cytochrome b2 (L-lactate cytochrome-c oxidoreductase); component of the mitochondrial intermembrane space, required for lactate utilization; expression is repressed by glucose and anaerobic conditions Cyb2p
YMR310C	1.44671	2.89402e-34	1.51394e-32	112.474	126.58	44.755	45.853	No	YMR310C	Putative methyltransferase; predicted to be involved in ribosome biogenesis; green fluorescent protein (GFP)-fusion protein localizes to the nucleus; not an essential gene; YMR310C has a paralog, YGR283C, that arose from the whole genome duplication putative methyltransferase
YML115C	1.4398	1.41678e-37	8.92574e-36	131.459	123.748	49.891	47.402	No	VAN1	Component of the mannan polymerase I; complex contains Van1p and Mnn9p and is involved in the first steps of mannan synthesis; mutants are vanadate-resistant Van1p
YKL165C	1.43493	4.91391e-24	1.51529e-22	63.098	59.436	23.201	23.641	No	MCD4	Protein involved in GPI anchor synthesis; multimembrane-spanning protein that localizes to the endoplasmic reticulum; highly conserved among eukaryotes; GPI stands for glycosylphosphatidylinositol mannose-ethanolamine phosphotransferase MCD4
YER190W	1.42127	0.0130172	0.0355894	2.771	3.398	1.435	0.912	No	YRF1-2	Helicase encoded by the Y' element of subtelomeric regions; highly expressed in the mutants lacking the telomerase component TLC1; potentially phosphorylated by Cdc28p; induced by treatment with 8-methoxypsoralen and UVA irradiation Y' element ATP-dependent helicase protein 1 copy 2
YMR311C	1.41971	1.24983e-68	3.05114e-66	387.258	389.378	149.751	150.426	No	GLC8	Regulatory subunit of protein phosphatase 1 (Glc7p); involved in glycogen metabolism and chromosome segregation; proposed to regulate Glc7p activity via conformational alteration; ortholog of the mammalian protein phosphatase inhibitor 2; protein abundance increases in response to DNA replication stress Glc8p
YML030W	1.41858	1.62164e-38	1.06755e-36	121.146	123.869	46.513	48.229	No	RCF1	Cytochrome c oxidase subunit; required for assembly of the Complex III-Complex IV supercomplex, and for assembly of Cox13p and Rcf2p into cytochrome c oxidase; similar to Rcf2p, and either Rcf1p or Rcf2p is required for late-stage assembly of the Cox12p and Cox13p subunits and for cytochrome c oxidase activity; required for growth under hypoxic conditions; member of the hypoxia induced gene famil…
YML101C	1.40259	6.01181e-31	2.73048e-29	142.777	166.183	63.491	57.256	No	CUE4	hypothetical protein; has a CUE domain that binds ubiquitin, which may facilitate intramolecular monoubiquitination; CUE4 has a paralog, CUE1, that arose from the whole genome duplication Cue4p
YMR013C	1.3981	2.76697e-26	9.88517e-25	72.935	71.888	29.254	27.557	No	SEC59	Dolichol kinase; catalyzes the terminal step in dolichyl monophosphate (Dol-P) biosynthesis; required for viability and for normal rates of lipid intermediate synthesis and protein N-glycosylation dolichol kinase
YLR390W-A	1.38503	6.56529e-48	6.86894e-46	1402.36	1663.33	600.59	612.668	No	CCW14	Covalently linked cell wall glycoprotein; present in the inner layer of the cell wall Ccw14p
YDR039C	1.38431	2.21734e-06	1.48304e-05	17.72	12.136	6.121	5.749	No	ENA2	P-type ATPase sodium pump; involved in Na+ efflux to allow salt tolerance; likely not involved in Li+ efflux Na(+)-exporting P-type ATPase ENA2
YMR122W-A	1.38085	1.7759e-70	5.12236e-68	4032.32	3992.78	1518.48	1668.33	No	YMR122W-A	hypothetical protein; green fluorescent protein (GFP)-fusion protein localizes to the cytoplasm and endoplasmic reticulum hypothetical protein
YMR250W	1.37495	1.71878e-49	1.9366e-47	291.562	293.31	122.025	111.105	No	GAD1	Glutamate decarboxylase; converts glutamate into gamma-aminobutyric acid (GABA) during glutamate catabolism; involved in response to oxidative stress glutamate decarboxylase GAD1
YER189W	1.37408	0.00613426	0.0186463	4.125	4.615	1.18	2.289	No	YER189W	hypothetical protein
YLL066C	1.37204	0.000158227	0.000739277	13.066	11.774	6.783	3.133	No	YLL066C	Putative Y' element ATP-dependent helicase; YLL066C is not an essential gene Y' element ATP-dependent helicase
YMR198W	1.36144	2.52841e-17	4.95449e-16	41.593	44.05	17.004	17.488	No	CIK1	Kinesin-associated protein; required for both karyogamy and mitotic spindle organization, interacts stably and specifically with Kar3p and may function to target this kinesin to a specific cellular role; locus encodes a long and short transcript with differing functions; CIK1 has a paralog, VIK1, that arose from the whole genome duplication Cik1p
YMR149W	1.35823	5.46366e-53	7.11369e-51	341.602	360.695	136.728	146.51	No	SWP1	Delta subunit of the oligosaccharyl transferase glycoprotein complex; complex is required for N-linked glycosylation of proteins in the endoplasmic reticulum dolichyl-diphosphooligosaccharide-protein glycotransferase
YMR183C	1.35587	2.57836e-39	1.71666e-37	147.368	145.058	60.087	58.074	No	SSO2	Plasma membrane t-SNARE; involved in fusion of secretory vesicles at the plasma membrane; syntaxin homolog that is functionally redundant with Sso1p; SSO2 has a paralog, SSO1, that arose from the whole genome duplication syntaxin
YMR238W	1.34838	1.10563e-44	9.66846e-43	304.915	321.12	134.13	120.046	No	DFG5	Putative mannosidase; essential glycosylphosphatidylinositol (GPI)-anchored membrane protein required for cell wall biogenesis in bud formation, involved in filamentous growth, homologous to Dcw1p putative mannan endo-1,6-alpha-mannosidase
YMR309C	1.3428	2.80794e-30	1.26552e-28	126.715	122.829	47.565	54.236	No	NIP1	eIF3c subunit of the eukaryotic translation initiation factor 3 (eIF3); involved in the assembly of preinitiation complex and start codon selection; eIF3 is also involved in programmed stop codon readthrough translation initiation factor eIF3 core subunit c
YML081C-A	1.34153	1.04184e-22	2.97762e-21	260.722	200.985	90.097	98.523	No	ATP18	Subunit of the mitochondrial F1F0 ATP synthase; F1F0 ATP synthase is a large, evolutionarily conserved enzyme complex required for ATP synthesis; termed subunit I or subunit j; does not correspond to known ATP synthase subunits in other organisms F1F0 ATP synthase subunit i
YMR227C	1.33998	8.03602e-25	2.54503e-23	81.033	77.766	33.974	30.973	No	TAF7	TFIID subunit (67 kDa); involved in RNA polymerase II transcription initiation Taf7p
YMR043W	1.33956	3.74454e-53	5.10215e-51	304.538	320.897	129.843	125.658	Yes	MCM1	Transcription factor; involved in cell-type-specific transcription and pheromone response; plays a central role in the formation of both repressor and activator complexes; relocalizes to the cytosol in response to hypoxia transcription factor MCM1
YMR159C	1.337	6.68609e-12	8.33485e-11	31.369	38.572	13.209	15.37	No	ATG16	Conserved protein involved in autophagy; interacts with Atg12p-Atg5p conjugates to form Atg12p-Atg5p-Atg16p multimers, which binds to membranes and localizes to the pre-autophagosomal structure and are required for autophagy; relocalizes from nucleus to cytoplasmic foci upon DNA replication stress Atg16p
YML015C	1.3345	5.82565e-33	2.96804e-31	114.896	111.974	45.851	47.196	No	TAF11	TFIID subunit (40 kDa); involved in RNA polymerase II transcription initiation, similar to histone H3 with atypical histone fold motif of Spt3-like transcription factors Taf11p
YMR219W	1.3251	3.45619e-15	5.67221e-14	37.441	37.551	15.136	15.827	No	ESC1	Protein involved in telomeric silencing; required for quiescent cell telomere hypercluster localization at nuclear membrane vicinity; interacts with PAD4-domain of Sir4p Esc1p
YMR197C	1.32312	9.69304e-40	6.60367e-38	182.316	199.007	79.544	78.006	No	VTI1	Protein involved in cis-Golgi membrane traffic; v-SNARE that interacts with two t-SNARES, Sed5p and Pep12p; required for multiple vacuolar sorting pathways; human homolog VTI1A can complement yeast null mutant v-SNARE protein VTI1
YML031W	1.32236	3.26462e-32	1.60735e-30	118.411	123.859	51.912	48.22	No	NDC1	Subunit of the transmembrane ring of the nuclear pore complex (NPC); contributes to nucleocytoplasmic transport, NPC biogenesis and spindle pole body duplication; homologous to human NDC1 Ndc1p
YMR294W	1.32161	2.73783e-19	6.31534e-18	51.126	51.999	21.062	21.593	No	JNM1	Component of the yeast dynactin complex; consisting of Nip100p, Jnm1p, and Arp1p; required for proper nuclear migration and spindle partitioning during mitotic anaphase B Jnm1p
YMR121C	1.31552	2.7025e-44	2.32852e-42	240.544	246.205	105.174	97.051	No	RPL15B	Ribosomal 60S subunit protein L15B; binds to 5.8 S rRNA; homologous to mammalian ribosomal protein L15, no bacterial homolog; RPL15B has a paralog, RPL15A, that arose from the whole genome duplication; relocalizes from nucleus to nucleolus upon DNA replication stress ribosomal 60S subunit protein L15B
YML085C	1.31339	3.34834e-57	5.30214e-55	356.552	358.104	146.822	150.503	No	TUB1	Alpha-tubulin; associates with beta-tubulin (Tub2p) to form tubulin dimer, which polymerizes to form microtubules; relative distribution to nuclear foci increases upon DNA replication stress; TUB1 has a paralog, TUB3, that arose from the whole genome duplication alpha-tubulin TUB1
YML062C	1.3129	5.0788e-20	1.25028e-18	69.259	61.433	26.792	27.643	No	MFT1	Subunit of the THO complex; THO is a nuclear complex comprised of Hpr1p, Mft1p, Rlr1p, and Thp2p, that is involved in transcription elongation and mitotic recombination; involved in telomere maintenance Mft1p
YMR145C	1.31156	4.52157e-53	6.02089e-51	305.695	313.228	131.015	126.759	No	NDE1	Mitochondrial external NADH dehydrogenase; type II NAD(P)H:quinone oxidoreductase that catalyzes the oxidation of cytosolic NADH; Nde1p and Nde2p provide cytosolic NADH to the mitochondrial respiratory chain; NDE1 has a paralog, NDE2, that arose from the whole genome duplication NADH-ubiquinone reductase (H(+)-translocating) NDE1
YMR112C	1.29609	1.39839e-26	5.15293e-25	165.116	174.066	78.39	64.331	No	MED11	Subunit of the RNA polymerase II mediator complex; associates with core polymerase subunits to form the RNA polymerase II holoenzyme; essential protein Med11p
YJL225C	1.29524	4.2839e-06	2.71051e-05	17.765	13.473	7.513	5.697	No	YJL225C	Putative Y' element ATP-dependent helicase Y' element ATP-dependent helicase
YMR200W	1.29523	7.58336e-37	4.72669e-35	272.389	312.996	119.919	126.553	No	ROT1	Molecular chaperone involved in protein folding in ER; mutation causes defects in cell wall synthesis and lysis of autophagic bodies, suppresses tor2 mutations, and is synthetically lethal with kar2-1 and with rot2 mutations; involved in N-linked glycosylation and O-mannosylation; transmembrane helix Ser250 is essential for Rot1p to interact with other membrane components and exert its functional…
YMR114C	1.29444	5.45461e-31	2.49676e-29	124.994	132.309	56.598	51.852	No	YMR114C	hypothetical protein; may interact with ribosomes, based on co-purification experiments; green fluorescent protein (GFP)-fusion protein localizes to the nucleus and cytoplasm; YMR114C is not an essential gene putative peptide hydrolase
YMR297W	1.29001	1.09659e-56	1.69077e-54	407.731	425.062	177.85	174.256	No	PRC1	Vacuolar carboxypeptidase Y (proteinase C, CPY); broad-specificity C-terminal exopeptidase involved in non-specific protein degradation in the vacuole; member of the serine carboxypeptidase family carboxypeptidase C PRC1
YMR307W	1.2896	6.24772e-56	9.38599e-54	888.138	981.709	393.563	397.085	No	GAS1	Beta-1,3-glucanosyltransferase; required for cell wall assembly and also has a role in transcriptional silencing; localizes to cell surface via a glycosylphosphatidylinositol (GPI) anchor; also found at nuclear periphery; genetic interactions with histone H3 lysine acetyltransferases GCN5 and SAS3 indicate previously unsuspected functions for Gas1 in DNA damage response and cell cycle regulation …
YMR044W	1.28908	9.54957e-26	3.29123e-24	91.382	89.986	40.112	36.662	No	IOC4	Member of a complex (Isw1b) with Isw1p and Ioc2p; interacts directly with H3K36me3 nucleosomes through its PWWP domain to recruit the Isw1b complex to open reading frames in a Set2p-dependent manner; Isw1b exhibits nucleosome-stimulated ATPase activity and acts within coding regions to coordinate transcription elongation with termination and processing Ioc4p
YMR062C	1.28881	6.46647e-36	3.82698e-34	164.38	175.821	74.273	69.632	No	ARG7	Mitochondrial ornithine acetyltransferase; catalyzes the fifth step in arginine biosynthesis; also possesses acetylglutamate synthase activity, regenerates acetylglutamate while forming ornithine glutamate N-acetyltransferase
YDR074W	1.28607	7.60181e-43	5.71013e-41	251.153	243.029	101.141	108.48	No	TPS2	Phosphatase subunit of the trehalose-6-P synthase/phosphatase complex; involved in synthesis of the storage carbohydrate trehalose; expression is induced by stress conditions and repressed by the Ras-cAMP pathway; protein abundance increases in response to DNA replication stress trehalose-phosphatase TPS2
YMR260C	1.28598	2.79831e-66	6.55811e-64	1264.4	1307.77	529.425	561.246	No	TIF11	Translation initiation factor eIF1A; essential protein that forms a complex with Sui1p (eIF1) and the 40S ribosomal subunit and scans for the start codon; C-terminus associates with Fun12p (eIF5B); N terminus interacts with eIF2 and eIF3 Tif11p
YMR191W	1.28427	1.58893e-48	1.69265e-46	333.352	360.463	148.494	145.985	No	SPG5	Protein required for proteasome assembly during quiescence; binds to base of the proteasome regulartory particle; required for survival at high temperature during stationary phase; not required for growth on nonfermentable carbon sources Spg5p
YML069W	1.28185	1.21236e-32	6.07111e-31	147.619	145.81	65.486	59.313	No	POB3	Subunit of the heterodimeric FACT complex (Spt16p-Pob3p); FACT associates with chromatin via interaction with Nhp6Ap and Nhp6Bp, and reorganizes nucleosomes to facilitate access to DNA by RNA and DNA polymerases; protein abundance increases in response to DNA replication stress FACT complex subunit POB3
YML118W	1.27832	1.57179e-11	1.88325e-10	27.737	30.772	12.165	12.754	No	NGL3	3'-5' exonuclease specific for poly-A RNAs; has a domain similar to a magnesium-dependent endonuclease motif in mRNA deadenylase Ccr4p; similar to Ngl1p; NGL3 has a paralog, NGL2, that arose from the whole genome duplication 3'-5' poly(A) RNA exonuclease
YMR047C	1.27745	9.59431e-23	2.75554e-21	92.835	94.406	43.185	36.645	No	NUP116	FG-nucleoporin component of central core of the nuclear pore complex; contributes directly to nucleocytoplasmic transport and maintenance of the nuclear pore complex (NPC) permeability barrier; forms a stable association with Nup82p, Gle2p and two other FG-nucleoporins (Nsp1p and Nup159p); NUP116 has a paralog, NUP100, that arose from the whole genome duplication FG-nucleoporin NUP116
YMR071C	1.27657	1.64694e-35	9.46019e-34	233.944	261.73	101.285	110.192	No	TVP18	Integral membrane protein; localized to late Golgi vesicles along with the v-SNARE Tlg2p; may interact with ribosomes, based on co-purification experiments; may have a role in intracellular sterol transport Tvp18p
YBR078W	1.27565	1.98234e-59	3.62954e-57	1117.45	1219.55	495.298	502.596	No	ECM33	GPI-anchored hypothetical protein; possible role in apical bud growth; GPI-anchoring on the plasma membrane crucial to function; phosphorylated in mitochondria; similar to Sps2p; ECM33 has a paralog, PST1, that arose from the whole genome duplication Ecm33p
YMR032W	1.27239	2.34306e-23	6.96853e-22	73.814	72.956	31.453	31.421	No	HOF1	Protein that regulates actin cytoskeleton organization; required for cytokinesis, actin cable organization, and secretory vesicle trafficking; localized to bud neck; phosphorylated by Dbf2p; regulates actomyosin ring dynamics and septin localization; contains an SH3 domain; N terminus controls cell size and levels of actin cables, while C terminus controls actin cable organization via direct regu…
YML117W	1.272	3.16064e-38	2.05758e-36	232.213	228.618	103.781	93.583	No	NAB6	Putative RNA-binding protein; associates with mRNAs encoding cell wall proteins in high-throughput studies; deletion mutants display increased sensitivity to some cell wall disrupting agents; expression negatively regulated by cAMP Nab6p
YMR269W	1.27056	4.94748e-14	7.39472e-13	85.392	72.362	28.999	38.676	No	TMA23	Nucleolar protein implicated in ribosome biogenesis; deletion extends chronological lifespan Tma23p
YBR200W-A	1.26641	0.00128677	0.00480426	80.755	133.99	51.861	40.328	No	YBR200W-A	hypothetical protein; identified by fungal homology and RT-PCR hypothetical protein
YMR286W	1.26531	1.72417e-32	8.56096e-31	462.489	559.86	214.116	225.376	No	MRPL33	Mitochondrial ribosomal protein of the large subunit mitochondrial 54S ribosomal protein YmL33
YMR313C	1.26424	5.25251e-22	1.45163e-20	75.94	72.26	30.825	33.03	No	TGL3	Bifunctional triacylglycerol lipase and LPE acyltransferase; major lipid particle-localized triacylglycerol (TAG) lipase; catalyzes acylation of lysophosphatidylethanolamine (LPE), a function which is essential for sporulation; protein level and stability of Tgl3p are markedly reduced in the absence of lipid droplets; required with Tgl4p for timely bud formation bifunctional triglyceride lipase/l…
YMR277W	1.26129	1.43454e-25	4.83044e-24	95.364	89.577	40.035	39.752	No	FCP1	Carboxy-terminal domain (CTD) phosphatase; essential for dephosphorylation of the repeated C-terminal domain of the RNA polymerase II large subunit (Rpo21p); relocalizes to the cytosol in response to hypoxia protein serine/threonine phosphatase
YMR236W	1.26004	3.34857e-52	4.26506e-50	482.227	515.642	219.575	211.168	No	TAF9	Subunit (17 kDa) of TFIID and SAGA complexes; involved in RNA polymerase II transcription initiation and in chromatin modification, similar to histone H3 chromatin modification protein
YMR144W	1.2593	6.44958e-18	1.31209e-16	67.151	79.985	33.202	30.268	No	FDO1	Protein involved in directionality of mating type switching; acts with Fkh1p to control which donor mating-type locus is inserted into MAT locus during mating type switching; localized to the nucleus; not an essential gene Fdo1p
YMR276W	1.25862	5.60553e-43	4.32142e-41	374.828	419.927	172.994	170.315	No	DSK2	Nuclear-enriched ubiquitin-like polyubiquitin-binding protein; required for spindle pole body (SPB) duplication and for transit through the G2/M phase of the cell cycle; involved in proteolysis; interacts with the proteasome; protein abundance increases in response to DNA replication stress Dsk2p
YML010W	1.25837	4.50648e-25	1.46686e-23	96.987	90.859	41.674	39.545	No	SPT5	Spt4p/5p (DSIF) transcription elongation factor complex subunit; the Spt4/5 complex binds to ssRNA in a sequence-specific manner, and in concert with RNAP I and II has multiple roles regulating transcriptional elongation, RNA processing, quality control, and transcription-coupled repair; interacts with DNA upstream of RNAPII and the non-template strand of the transcription bubble; Spt5p is the on…
YML102W	1.25561	1.83231e-34	9.75954e-33	166.165	178.922	76.879	72.558	No	CAC2	Subunit of chromatin assembly factor I (CAF-1), with Rlf2p and Msi1p; chromatin assembly by CAF-1 is important for multiple processes including silencing at telomeres, mating type loci, and rDNA; maintenance of kinetochore structure, deactivation of the DNA damage checkpoint after DNA repair, chromatin dynamics during transcription; and repression of divergent transcription; relocalizes to the cy…
YMR105C	1.25275	9.62966e-32	4.58701e-30	251.987	271.768	122.059	105.115	No	PGM2	Phosphoglucomutase; catalyzes the conversion from glucose-1-phosphate to glucose-6-phosphate, which is a key step in hexose metabolism; functions as the acceptor for a Glc-phosphotransferase; protein abundance increases in response to DNA replication stress; PGM2 has a paralog, PGM1, that arose from the whole genome duplication phosphoglucomutase PGM2
YMR243C	1.25122	4.00798e-45	3.72742e-43	285.796	288.064	120.607	128.713	No	ZRC1	Vacuolar membrane zinc transporter; transports zinc from cytosol to vacuole for storage; also has role in resistance to zinc shock resulting from sudden influx of zinc into cytoplasm; human ortholog SLC30A10 functions as a Mn transporter and mutations in SLC30A10 cause neurotoxic accumulation of Mn in liver and brain; ZRC1 has a paralog, COT1, that arose from the whole genome duplication Zn(2+) t…
YPR202W	1.24611	9.48876e-11	1.05895e-09	33.674	29.398	12.793	14.725	No	YPR202W	hypothetical protein; similar to telomere-encoded helicases; down-regulated at low calcium levels; YPR202W is not an essential gene; transcript is predicted to be spliced but there is no evidence that it is spliced in vivo hypothetical protein
YMR229C	1.24094	5.9374e-20	1.44947e-18	72.666	66.642	29.814	31.188	No	RRP5	RNA binding protein involved in synthesis of 18S and 5.8S rRNAs; component of ribosomal small subunit (SSU) processome and 90S preribosome; required for pre-rRNA packaging and compaction of processome into dense terminal balls; part of Mak21p-Noc2p-Rrp5p module that associates with nascent pre-rRNA during transcription with role in biogenesis of large ribosomal subunit; binds single stranded trac…
YDR541C	1.23782	0.000796895	0.00316543	7.076	7.651	3.803	2.659	No	YDR541C	Aldehyde reductase; substrates include both aromatic and aliphatic aldehydes; uses NADPH as cofactor; SWAT-GFP and mCherry fusion proteins localize to the endoplasmic reticulum and vacuole respectively carbonyl reductase (NADPH-dependent)
YMR153W	1.23261	1.05822e-28	4.33576e-27	108.34	109.68	47.396	48.581	No	NUP53	FG-nucleoporin component of central core of nuclear pore complex (NPC); also part of the NPC nuclear basket; contributes directly to nucleocytoplasmic transport; involved in regulation of transcription and mitosis; induces membrane tubulation, which may contribute to nuclear pore assembly; NUP53 has a paralog, ASM4, that arose from the whole genome duplication FG-nucleoporin NUP53
YMR296C	1.23246	2.78844e-43	2.20776e-41	235.988	239.659	103.246	106.061	No	LCB1	Component of serine palmitoyltransferase; responsible along with Lcb2p for the first committed step in sphingolipid synthesis, which is the condensation of serine with palmitoyl-CoA to form 3-ketosphinganine serine C-palmitoyltransferase LCB1
YML060W	1.23177	1.53109e-14	2.37948e-13	41.288	42.509	19.126	17.754	No	OGG1	Nuclear and mitochondrial glycosylase/lyase; specifically excises 7,8-dihydro-8-oxoguanine residues located opposite cytosine or thymine residues in DNA, repairs oxidative damage to mitochondrial DNA, contributes to UVA resistance 8-oxoguanine glycosylase OGG1
YLR120C	1.23142	1.45627e-33	7.5507e-32	218.6	232.295	93.467	105.046	No	YPS1	Aspartic protease; hyperglycosylated member of the yapsin family of proteases, attached to the plasma membrane via a glycosylphosphatidylinositol (GPI) anchor; involved in nutrient limitation-induced cleavage of the extracellular inhibitory domain of signaling mucin Msb2p, resulting in activation of the filamentous growth MAPK pathway; involved with other yapsins in the cell wall integrity respon…
YJR109C	1.22832	2.32719e-15	3.87358e-14	50.435	45.815	20.985	21.532	No	CPA2	Large subunit of carbamoyl phosphate synthetase; carbamoyl phosphate synthetase catalyzes a step in the synthesis of citrulline, an arginine precursor carbamoyl-phosphate synthase (glutamine-hydrolyzing) CPA2
YMR124W	1.22625	2.3065e-27	8.77518e-26	131.271	140.016	63.288	56.585	No	EPO1	Protein involved in septin-ER tethering; interacts with ER membrane protein, Scs2p, and Shs1p, a septin ring component, at bud neck to create ER diffusion barrier; GFP-fusion protein localizes to the cell periphery, cytoplasm, bud, and bud neck; interacts with Crm1p in two-hybrid assay; YMR124W has a paralog, YLR031W, that arose from the whole genome duplication Epo1p
YML013W	1.22464	1.50876e-26	5.5249e-25	107.632	111.844	50.545	46.516	No	UBX2	Bridging factor involved in ER-associated protein degradation (ERAD); bridges the cytosolic Cdc48p-Npl1p-Ufd1p ATPase complex and the membrane associated Ssm4p and Hrd1p ubiquitin ligase complexes; contains a UBX (ubiquitin regulatory X) domain and a ubiquitin-associated (UBA) domain; redistributes from the ER to lipid droplets during the diauxic shift and stationary phase; required for the maint…
YMR138W	1.22304	2.18147e-12	2.83398e-11	55.699	53.67	27.836	20.637	No	CIN4	GTP-binding protein involved in beta-tubulin (Tub2p) folding; isolated as mutant with increased chromosome loss and sensitivity to benomyl; regulated by the GTPase-activating protein, Cin2p, the human retinitis pigmentosa 2 (RP2) homolog Arf family GTPase CIN4
YML071C	1.22295	1.19947e-20	3.0959e-19	75.635	75.045	35.205	31.541	No	COG8	Component of the conserved oligomeric Golgi complex; a cytosolic tethering complex (Cog1p through Cog8p) that functions in protein trafficking to mediate fusion of transport vesicles to Golgi compartments Golgi transport complex subunit COG8
YMR261C	1.21944	2.80849e-22	7.83569e-21	82.387	77.72	35.536	35.612	No	TPS3	Regulatory subunit of trehalose-6-phosphate synthase/phosphatase; involved in synthesis of storage carbohydrate trehalose; expression is induced by stress conditions and repressed by the Ras-cAMP pathway; TPS3 has a paralog, TSL1, that arose from the whole genome duplication trehalose 6-phosphate synthase/phosphatase complex subunit
YGL117W	1.21938	1.64221e-21	4.41364e-20	92.091	102.818	45.698	40.784	No	YGL117W	hypothetical protein
YMR038C	1.21745	1.40924e-43	1.16292e-41	299.221	302.958	138.154	129.642	No	CCS1	Copper chaperone for superoxide dismutase Sod1p; involved in oxidative stress protection; Met-X-Cys-X2-Cys motif within N-terminus is involved in insertion of copper into Sod1p under conditions of copper deprivation; required for regulation of yeast copper genes in response to DNA-damaging agents; protein abundance increases in response to DNA replication stress; human homolog CCS can complement …
YMR048W	1.21357	5.0334e-20	1.24433e-18	66.703	72.204	30.731	31.171	No	CSM3	Replication fork associated factor; required for stable replication fork pausing; component of the DNA replication checkpoint pathway; required for accurate chromosome segregation during meiosis; forms nuclear foci upon DNA replication stress Csm3p
YMR036C	1.21286	1.84898e-20	4.73064e-19	77.572	81.23	37.548	33.288	No	MIH1	Protein tyrosine phosphatase involved in cell cycle control; regulates the phosphorylation state of Cdc28p; homolog of S. pombe cdc25 putative tyrosine protein phosphatase MIH1
YMR225C	1.21252	8.17677e-45	7.25874e-43	332.814	330.034	143.316	152.56	No	MRPL44	Mitochondrial ribosomal protein of the large subunit; protein abundance increases in response to DNA replication stress mitochondrial 54S ribosomal protein YmL44
YML119W	1.21197	4.29629e-32	2.08033e-30	161.977	176.387	76.955	73.995	No	YML119W	hypothetical protein; YML119W is not an essential gene; potential Cdc28p substrate hypothetical protein
YMR146C	1.21189	3.53188e-44	2.99903e-42	688.774	775.395	323.959	329.398	No	TIF34	eIF3i subunit of the eukaryotic translation initiation factor 3 (eIF3); subunit of the core complex of eIF3; essential for translation; stimulates rate of ribosomal scanning during translation reinitiation; eIF3 is also involved in programmed stop codon readthrough translation initiation factor eIF3 subunit i
YML095C	1.20744	1.27729e-18	2.73126e-17	64.416	72.232	30.077	31.111	No	RAD10	Single-stranded DNA endonuclease (with Rad1p); cleaves single-stranded DNA during nucleotide excision repair and double-strand break repair; subunit of Nucleotide Excision Repair Factor 1 (NEF1); homolog of human ERCC1 protein Rad10p
YMR092C	1.20262	3.80537e-32	1.85797e-30	144.49	149.004	67.091	64.744	No	AIP1	Actin cortical patch component; interacts with the actin depolymerizing factor cofilin; inhibits elongation of aged ADP-actin filaments decorated with cofilin to maintain a high level of assembly-competent actin species; required to restrict cofilin localization to cortical patches; putative regulator of cytokinesis; contains WD repeats; protein increases in abundance and relocalizes from cytopla…
YMR128W	1.20086	2.85762e-17	5.52567e-16	59.78	55.778	25.68	26.343	No	ECM16	Essential DEAH-box ATP-dependent RNA helicase specific to U3 snoRNP; predominantly nucleolar in distribution; required for 18S rRNA synthesis ATP-dependent RNA helicase ECM16
YMR108W	1.20034	5.64289e-42	4.13272e-40	283.482	275.733	128.545	123.196	No	ILV2	Acetolactate synthase; catalyses the first common step in isoleucine and valine biosynthesis and is the target of several classes of inhibitors, localizes to the mitochondria; expression of the gene is under general amino acid control acetolactate synthase catalytic subunit
YDL248W	1.19144	0.000944937	0.00365921	7.632	6.565	3.014	3.468	No	COS7	Endosomal protein involved in turnover of plasma membrane proteins; member of the DUP380 subfamily of conserved, often subtelomeric COS genes; required for the multivesicular vesicle body sorting pathway that internalizes plasma membrane proteins for degradation; Cos proteins provide ubiquitin in trans for nonubiquitinated cargo proteins; the authentic, non-tagged protein is detected in highly pu…
YMR255W	1.19137	8.47967e-37	5.22973e-35	199.561	207.484	93.883	90.381	No	GFD1	Coiled-coiled hypothetical protein; identified as a high-copy suppressor of a dbp5 mutation; protein abundance increases in response to DNA replication stress Gfd1p
YML020W	1.18988	1.20195e-15	2.04716e-14	51.036	50.105	21.996	23.934	No	YML020W	hypothetical protein
YJL116C	1.18672	2.85465e-24	8.89649e-23	140.212	131.269	65.707	57.669	No	NCA3	Protein involved in mitochondrion organization; functions with Nca2p to regulate mitochondrial expression of subunits 6 (Atp6p) and 8 (Atp8p) of the Fo-F1 ATP synthase; SWAT-GFP, seamless-GFP and mCherry fusion proteins localize to the vacuole; member of the SUN family; expression induced in cells treated with the mycotoxin patulin; NCA3 has a paralog, UTH1, that arose from the whole genome dupli…
YML113W	1.18131	9.33612e-33	4.71554e-31	158.004	164.279	74.451	72.48	No	DAT1	DNA binding protein that recognizes oligo(dA).oligo(dT) tracts; Arg side chain in its N-terminal pentad Gly-Arg-Lys-Pro-Gly repeat is required for DNA-binding; relocalizes to the cytosol in response to hypoxia; not essential for viability Dat1p
YML027W	1.17956	1.37352e-23	4.19139e-22	96.861	105.641	47.056	45.354	Yes	YOX1	Homeobox transcriptional repressor; binds to Mcm1p and to early cell cycle boxes (ECBs) in the promoters of cell cycle-regulated genes expressed in M/G1 phase; expression is cell cycle-regulated; phosphorylated by Cdc28p; relocalizes from nucleus to cytoplasm upon DNA replication stress; YOX1 has a paralog, YHP1, that arose from the whole genome duplication Yox1p
YGL126W	1.17869	1.17722e-24	3.70824e-23	124.689	123.85	60.308	53.194	No	SCS3	Protein required for inositol prototrophy; required for normal ER membrane biosynthesis; ortholog of the FIT family of proteins involved in triglyceride droplet biosynthesis and homologous to human FIT2; disputed role in the synthesis of inositol phospholipids from inositol Scs3p
YML029W	1.17512	9.58444e-20	2.32047e-18	72.765	71.693	34.144	31.972	No	USA1	Scaffold subunit of the Hrd1p ubiquitin ligase; also promotes ligase oligomerization; involved in ER-associated protein degradation (ERAD); interacts with the U1 snRNP-specific protein, Snp1p Usa1p
YMR235C	1.17416	1.22486e-31	5.78746e-30	189.374	189.814	82.567	91.216	No	RNA1	GTPase activating protein (GAP) for Gsp1p; involved in nuclear transport GTPase-activating protein RNA1
YML124C	1.1729	1.17034e-41	8.4655e-40	262.363	271.136	122.101	122.516	No	TUB3	Alpha-tubulin; associates with beta-tubulin (Tub2p) to form tubulin dimer, which polymerizes to form microtubules; expressed at lower level than Tub1p; TUB3 has a paralog, TUB1, that arose from the whole genome duplication alpha-tubulin TUB3
YML032C	1.17266	4.36272e-20	1.08771e-18	85.239	95.715	43.117	39.76	No	RAD52	Protein that stimulates strand exchange; stimulates strand exchange by facilitating Rad51p binding to single-stranded DNA; anneals complementary single-stranded DNA; involved in the repair of double-strand breaks in DNA during vegetative growth and meiosis and UV induced sister chromatid recombination recombinase RAD52
YML067C	1.16325	6.44469e-28	2.56867e-26	151.852	149.292	72.897	66.181	No	ERV41	Protein localized to COPII-coated vesicles; forms a complex with Erv46p; involved in the membrane fusion stage of transport; has homology to human ERGIC2 (PTX1) protein Erv41p
YMR001C	1.16244	3.10278e-21	8.26326e-20	83.688	82.604	39.662	37.152	No	CDC5	Polo-like kinase; controls targeting and activation of Rho1p at cell division site via Rho1p guanine nucleotide exchange factors; regulates Spc72p; also functions in adaptation to DNA damage during meiosis; regulates the shape of the nucleus and expansion of the nuclear envelope during mitosis; similar to Xenopus Plx1 and S. pombe Plo1p; human homologs PLK1, PLK3 can each complement yeast cdc5 th…
YML063W	1.16192	3.1597e-58	5.44491e-56	2846.12	2876.62	1280.49	1364.32	No	RPS1B	Ribosomal protein 10 (rp10) of the small (40S) subunit; homologous to mammalian ribosomal protein S3A, no bacterial homolog; RPS1B has a paralog, RPS1A, that arose from the whole genome duplication ribosomal 40S subunit protein S1B
YCL058C	1.15971	1.35857e-12	1.80906e-11	62.344	50.662	25.077	27.316	Yes	FYV5	Protein involved in regulation of the mating pathway; binds with Matalpha2p to promoters of haploid-specific genes; required for survival upon exposure to K1 killer toxin; involved in ion homeostasis Fyv5p
YMR199W	1.15968	1.08687e-17	2.18081e-16	72.729	84.842	36.402	36.524	No	CLN1	G1 cyclin involved in regulation of the cell cycle; activates Cdc28p kinase to promote the G1 to S phase transition; late G1 specific expression depends on transcription factor complexes, MBF (Swi6p-Mbp1p) and SBF (Swi6p-Swi4p); CLN1 has a paralog, CLN2, that arose from the whole genome duplication; cell cycle arrest phenotype of the cln1 cln2 cln3 triple null mutant is complemented by any of hum…
YMR080C	1.1586	1.18352e-18	2.54002e-17	77.401	70.802	34.05	34.7	No	NAM7	ATP-dependent RNA helicase of the SFI superfamily; involved in nonsense mediated mRNA decay; required for efficient translation termination at nonsense codons and targeting of NMD substrates to P-bodies; binds to the small ribosomal subunit via an interaction with Rps26; forms cytoplasmic foci upon DNA replication stress ATP-dependent RNA helicase NAM7
YML088W	1.15672	3.29404e-23	9.6499e-22	91.929	96.421	44.119	43.228	No	UFO1	F-box receptor protein; subunit of the Skp1-Cdc53-F-box receptor (SCF) E3 ubiquitin ligase complex; binds to phosphorylated Ho endonuclease, allowing its ubiquitination by SCF and subsequent degradation SCF ubiquitin ligase complex subunit UFO1
YPR201W	1.15338	0.0119192	0.0330814	3.775	4.875	2.148	1.902	No	ARR3	Plasma membrane metalloid/H+ antiporter; member of bile/arsenite/riboflavin transporter (BART) superfamily; transports arsenite and antimonite; required for resistance to arsenic compounds; transcription is activated by Arr1p in the presence of arsenite Arr3p
YML012W	1.15119	1.31286e-46	1.30373e-44	825.488	781.133	364.427	383.849	No	ERV25	Member of the p24 family involved in ER to Golgi transport; role in misfolded protein quality control; forms a heterotrimeric complex with Erp1, Erp2p, and Emp24 Erv25p
YMR123W	1.15092	3.26864e-25	1.08197e-23	334.267	329.7	139.216	170.056	No	PKR1	V-ATPase assembly factor; functions with other V-ATPase assembly factors in the ER to efficiently assemble the V-ATPase membrane sector (V0); protein abundance increases in response to DNA replication stress Pkr1p
YMR037C	1.14911	2.74166e-22	7.68582e-21	86.898	87.637	40.366	41.068	Yes	MSN2	Stress-responsive transcriptional activator; activated in stochastic pulses of nuclear localization in response to various stress conditions; binds DNA at stress response elements of responsive genes; relative distribution to nucleus increases upon DNA replication stress stress-responsive transcriptional activator MSN2
YMR078C	1.14736	3.19974e-15	5.28091e-14	49.574	51.562	23.566	23.632	No	CTF18	Subunit of a complex with Ctf8p; shares some subunits with Replication Factor C and is required for sister chromatid cohesion; may have overlapping functions with Rad24p in the DNA damage replication checkpoint Ctf18p
YMR234W	1.14485	6.97212e-17	1.28458e-15	61.986	63.782	28.023	30.818	No	RNH1	Ribonuclease H1; able to bind double-stranded RNAs and RNA-DNA hybrids; associates with RNAse polymerase I. RNA-DNA hybrid ribonuclease
YMR188C	1.14322	2.59403e-19	6.03112e-18	89.876	101.063	42.395	46.912	No	MRPS17	Mitochondrial ribosomal protein of the small subunit mitochondrial 37S ribosomal protein MRPS17
YML098W	1.14208	1.28366e-27	4.94801e-26	193.472	183.454	93.136	83.522	No	TAF13	TFIID subunit (19 kDa); involved in RNA polymerase II transcription initiation, similar to histone H4 with atypical histone fold motif of Spt3-like transcription factors Taf13p
YML041C	1.14155	1.02169e-18	2.20077e-17	78.585	77.812	34.517	38.822	No	VPS71	Nucleosome-binding component of the SWR1 complex; SWR1 exchanges histone variant H2AZ (Htz1p) for chromatin-bound histone H2A; required for vacuolar protein sorting Vps71p
YMR263W	1.14103	1.27685e-27	4.94801e-26	127.998	129.886	61.488	59.451	No	SAP30	Component of Rpd3L histone deacetylase complex; involved in silencing at telomeres, rDNA, and silent mating-type loci; involved in telomere maintenance Sap30p
YLR385C	1.13789	0.0142025	0.0383999	6.089	3.658	2.165	2.444	No	SWC7	hypothetical protein; component of the Swr1p complex that incorporates Htz1p into chromatin Swc7p
YPL189C-A	1.13706	1.47321e-17	2.93591e-16	187.356	160.741	73.61	90.183	No	COA2	Cytochrome oxidase assembly factor; null mutation results in respiratory deficiency with specific loss of cytochrome oxidase activity; functions downstream of assembly factors Mss51p and Coa1p and interacts with assembly factor Shy1p Coa2p
YMR308C	1.13497	1.469e-28	5.93578e-27	144.292	139.607	66.794	66.878	No	PSE1	Karyopherin/importin that interacts with the nuclear pore complex; acts as the nuclear import receptor for specific proteins, including Pdr1p, Yap1p, Ste12p, and Aft1p Pse1p
YMR314W	1.1348	6.09876e-40	4.25389e-38	402.637	426.074	188.53	201.649	No	PRE5	Alpha 6 subunit of the 20S proteasome; protein abundance increases in response to DNA replication stress proteasome core particle subunit alpha 6
YML072C	1.13472	7.53504e-19	1.6351e-17	81.822	78.36	35.893	39.657	No	TCB3	Cortical ER protein involved in ER-plasma membrane tethering; one of 6 proteins (Ist2p, Scs2p, Scs22p, Tcb1p, Tcb2p, Tcb3p) that connect ER to the plasma membrane (PM) and regulate PM phosphatidylinositol-4-phosphate (PI4P) levels by controlling access of Sac1p phosphatase to its substrate PI4P in the PM; localized to the bud via specific mRNA transport; non-tagged protein detected in a phosphory…
YCL030C	1.1331	2.99022e-25	9.95439e-24	116.42	120.897	57.43	54.408	No	HIS4	Multifunctional enzyme containing phosphoribosyl-ATP pyrophosphatase; phosphoribosyl-AMP cyclohydrolase, and histidinol dehydrogenase activities; catalyzes the second, third, ninth and tenth steps in histidine biosynthesis trifunctional histidinol dehydrogenase/phosphoribosyl-AMP cyclohydrolase/phosphoribosyl-ATP diphosphatase
YMR203W	1.13057	8.12785e-23	2.35748e-21	256.677	265.11	110.513	135.907	No	TOM40	Component of the TOM (translocase of outer membrane) complex; responsible for recognition and initial import steps for all mitochondrially directed proteins; constitutes the core element of the protein conducting pore; pre-Tom40p is phosphorylated by PKA, which impairs its import into mitochondria under non-respiratory conditions Tom40p
YMR093W	1.12937	3.99311e-22	1.1088e-20	105.408	98.324	48.932	47.437	No	UTP15	Nucleolar protein; component of the small subunit (SSU) processome containing the U3 snoRNA that is involved in processing of pre-18S rRNA snoRNA-binding rRNA-processing protein UTP15
YMR109W	1.12614	2.83247e-19	6.50801e-18	77.374	78.286	38.244	35.543	No	MYO5	One of two type I myosin motors; contains proline-rich tail homology 2 (TH2) and SH3 domains; MYO5 deletion has little effect on growth, but myo3 myo5 double deletion causes severe defects in growth and actin cytoskeleton organization; MYO5 has a paralog, MYO3, that arose from the whole genome duplication myosin 5
YMR140W	1.12287	5.34484e-25	1.71122e-23	110.869	113.914	53.686	52.979	No	SIP5	hypothetical protein; interacts with both the Reg1p/Glc7p phosphatase and the Snf1p kinase; forms cytoplasmic foci upon DNA replication stress Sip5p
YNL018C	1.12247	0.00197982	0.00703868	7.605	6.24	3.447	3.133	No	YNL018C	hypothetical protein; YNL018C has a paralog, YNL034W, that arose from a segmental duplication hypothetical protein
YML046W	1.12167	4.09702e-09	3.82846e-08	30.231	26.714	13.574	13.512	No	PRP39	U1 snRNP protein involved in splicing; contains multiple tetriatricopeptide repeats Prp39p
YMR072W	1.1211	1.74717e-36	1.06632e-34	319.111	336.562	150.252	161.373	No	ABF2	Mitochondrial DNA-binding protein; involved in mitochondrial DNA replication and recombination, member of HMG1 DNA-binding protein family; activity may be regulated by protein kinase A phosphorylation; ABF2 has a paralog, IXR1, that arose from the whole genome duplication; human homolog TFAM can complement yeast abf2 mutant, rescuing the loss-of-mitochondrial DNA phenotype in a yeast abf2 strain …
YMR251W-A	1.11982	0.00863687	0.0253144	1368.8	770.427	466.383	552.821	No	HOR7	hypothetical protein; overexpression suppresses Ca2+ sensitivity of mutants lacking inositol phosphorylceramide mannosyltransferases Csg1p and Csh1p; transcription is induced under hyperosmotic stress and repressed by alpha factor; HOR7 has a paralog, DDR2, that arose from the whole genome duplication Hor7p
YMR104C	1.11953	1.51109e-34	8.12246e-33	264.838	273.393	132.967	123.188	No	YPK2	Protein kinase similar to S/T protein kinase Ypk1p; functionally redundant with YPK1 at the genetic level; participates in a signaling pathway required for optimal cell wall integrity; involved in the TORC-dependent phosphorylation of ribosomal proteins Rps6a/b (S6); human homolog SGK2 can complement a ypk1 ypk2 double mutant putative protein kinase YPK2
YMR187C	1.11903	5.5665e-12	6.98375e-11	37.889	39.64	18.829	18.03	No	YMR187C	hypothetical protein; YMR187C is not an essential gene hypothetical protein
YMR264W	1.1153	8.97166e-40	6.18412e-38	300.108	297.758	141.032	144.341	No	CUE1	Ubiquitin-binding protein; ER membrane protein that recruits and integrates the ubiquitin-conjugating enzyme Ubc7p into ER membrane-bound ubiquitin ligase complexes that function in the ER-associated degradation (ERAD) pathway for misfolded proteins; contains a CUE domain that binds ubiquitin to facilitate intramolecular monoubiquitination and to promote diubiquitin elongation, facilitating polyu…
YMR125W	1.11519	7.39718e-14	1.09445e-12	55.502	56.781	24.619	29.028	No	STO1	Large subunit of the nuclear mRNA cap-binding protein complex; interacts with Npl3p to carry nuclear poly(A)+ mRNA to cytoplasm; also involved in nuclear mRNA degradation and telomere maintenance; orthologous to mammalian CBP80 Sto1p
YMR115W	1.11259	3.72904e-17	7.14002e-16	66.281	64.014	31.3	30.991	No	MGR3	Subunit of the mitochondrial (mt) i-AAA protease supercomplex; i-AAA degrades misfolded mitochondrial proteins; forms a subcomplex with Mgr1p that binds to substrates to facilitate proteolysis; required for growth of cells lacking mtDNA Mgr3p
YML061C	1.10921	1.75334e-11	2.08374e-10	40.23	37.077	18.464	18.675	No	PIF1	DNA helicase, potent G-quadruplex DNA binder/unwinder; possesses strand annealing activity; promotes DNA synthesis during break-induced replication; important for crossover recombination; translation from different start sites produces mitochondrial and nuclear forms; nuclear form is a catalytic inhibitor of telomerase; mitochondrial form involved in DNA repair and recombination; mutations affect…
YML065W	1.10609	2.32423e-11	2.729e-10	39.997	36.826	18.235	18.718	No	ORC1	Largest subunit of the origin recognition complex; involved in directing DNA replication by binding to replication origins; also involved in transcriptional silencing; exhibits ATPase activity; ORC1 has a paralog, SIR3, that arose from the whole genome duplication origin recognition complex subunit 1
YMR148W	1.10389	1.38893e-23	4.21646e-22	191.194	225.628	99.384	100.967	No	OSW5	hypothetical protein with possible role in spore wall assembly; predicted to contain an N-terminal transmembrane domain; osw5 null mutant spores exhibit increased spore wall permeability and sensitivity to beta-glucanase digestion Osw5p
YMR024W	1.10151	8.65879e-23	2.49911e-21	106.152	111.417	53.822	51.06	No	MRPL3	Mitochondrial ribosomal protein of the large subunit; located in close proximity to the polypeptide exit channel of the ribosome; mutations in human homolog MRPL44 cause childhood cardiomyopathy; human MRPL44 deficiency results in inefficient assembly of the mitochondrial ribosome, and in tissue-specific respiratory chain deficiency, manifesting as either Complex I+Complex IV or Complex IV defici…
snR83	1.1008	7.46418e-19	1.62575e-17	331.505	417.392	168.563	192.243	No	snR83	- -
YML114C	1.0994	1.09539e-25	3.75315e-24	132.957	143.145	66.649	66.559	No	TAF8	TFIID subunit (65 kDa); involved in RNA polymerase II transcription initiation Taf8p
YNL036W	1.09862	9.51368e-35	5.20941e-33	391.535	435.973	200.839	198.534	No	NCE103	Carbonic anhydrase; metalloenzyme that catalyzes CO2 hydration to bicarbonate, which is an important metabolic substrate, and protons; not expressed under conditions of high CO2, such as inside a growing colony, but transcription is induced in response to low CO2 levels, such as on the colony surface in ambient air; poorly transcribed under aerobic conditions and at an undetectable level under an…
YLR466W	1.09827	1.04909e-10	1.15974e-09	82.558	60.95	34.186	35.285	No	YRF1-4	Helicase encoded by the Y' element of subtelomeric regions; highly expressed in the mutants lacking the telomerase component TLC1; potentially phosphorylated by Cdc28p Y' element ATP-dependent helicase protein 1 copy 4
YMR163C	1.09748	3.73619e-11	4.30065e-10	36.418	36.984	17.131	18.322	No	INP2	Peroxisome-specific receptor important for peroxisome inheritance; co-fractionates with peroxisome membranes and co-localizes with peroxisomes in vivo; physically interacts with the myosin V motor Myo2p; INP2 is not an essential gene Inp2p
YML094W	1.09471	1.34473e-25	4.5542e-24	198.619	224.449	98.798	105.932	No	GIM5	Subunit of the heterohexameric cochaperone prefoldin complex; prefoldin binds specifically to cytosolic chaperonin and transfers target proteins to it; prefoldin complex also localizes to chromatin of actively transcribed genes in the nucleus and facilitates transcriptional elongation Gim5p
YMR253C	1.09344	5.21483e-17	9.76156e-16	65.591	69.223	32.302	32.97	No	YMR253C	hypothetical protein; green fluorescent protein (GFP)-fusion protein localizes to the cytoplasm in a punctate pattern; YMR253C is not an essential gene hypothetical protein
YMR005W	1.08537	1.07708e-22	3.06341e-21	110.519	117.573	56.7	54.425	No	TAF4	TFIID subunit (48 kDa); involved in RNA polymerase II transcription initiation; potential Cdc28p substrate Taf4p
YML026C	1.08401	7.75218e-43	5.74937e-41	3671.95	3757.59	1720.94	1903.07	No	RPS18B	Protein component of the small (40S) ribosomal subunit; homologous to mammalian ribosomal protein S18 and bacterial S13; RPS18B has a paralog, RPS18A, that arose from the whole genome duplication; protein abundance increases in response to DNA replication stress ribosomal 40S subunit protein S18B
YML127W	1.08346	4.37698e-19	9.78806e-18	83.58	83.105	39.399	41.981	No	RSC9	Component of the RSC chromatin remodeling complex; DNA-binding protein involved in the synthesis of rRNA and in transcriptional repression and activation of genes regulated by the Target of Rapamycin (TOR) pathway Rsc9p
YMR049C	1.08321	2.80874e-20	7.06284e-19	92.144	90.274	43.465	45.595	No	ERB1	Constituent of 66S pre-ribosomal particles; forms a complex with Nop7p and Ytm1p that is required for maturation of the large ribosomal subunit; required for maturation of the 25S and 5.8S ribosomal RNAs; homologous to mammalian Bop1 Erb1p
YMR054W	1.08262	2.71841e-23	8.04401e-22	111.264	109.94	54.408	53.668	No	STV1	Subunit a of the vacuolar-ATPase V0 domain; one of two isoforms (Stv1p and Vph1p); Stv1p is located in V-ATPase complexes of the Golgi and endosomes while Vph1p is located in V-ATPase complexes of the vacuole H(+)-transporting V0 sector ATPase subunit a
YMR021C	1.07809	1.16451e-15	1.98918e-14	63.555	65.602	30.222	33.056	Yes	MAC1	Copper-sensing transcription factor; involved in regulation of genes required for high affinity copper transport; required for regulation of yeast copper genes in response to DNA-damaging agents; undergoes changes in redox state in response to changing levels of copper or MMS Mac1p
YML081W	1.07711	9.92814e-18	1.99893e-16	76.083	73.253	36.164	37.066	Yes	TDA9	Transcription factor that regulates acetate production; green fluorescent protein (GFP)-fusion protein localizes to the nucleus; null mutant is sensitive to expression of the top1-T722A allele; not an essential gene; TDA9 has a paralog, RSF2, that arose from the whole genome duplication Tda9p
YML068W	1.07173	1.66033e-14	2.57351e-13	64.712	64.46	34.017	29.51	No	ITT1	Protein that modulates the efficiency of translation termination; interacts with translation release factors eRF1 (Sup45p) and eRF3 (Sup35p) in vitro, contains a zinc finger domain characteristic of the TRIAD class of proteins Itt1p
YDL124W	1.07091	1.14539e-35	6.64441e-34	1138.3	1285.98	607.416	585.472	No	YDL124W	NADPH-dependent alpha-keto amide reductase; reduces aromatic alpha-keto amides, aliphatic alpha-keto esters, and aromatic alpha-keto esters; member of the aldo-keto reductase (AKR) family; protein abundance increases in response to DNA replication stress aldo-keto reductase superfamily protein
YMR091C	1.06941	2.28985e-17	4.50209e-16	80.397	77.33	40.409	37.325	No	NPL6	Component of the RSC chromatin remodeling complex; interacts with Rsc3p, Rsc30p, Ldb7p, and Htl1p to form a module important for a broad range of RSC functions Npl6p
YMR202W	1.06882	3.65995e-40	2.58357e-38	424.026	447.431	213.93	215.54	No	ERG2	C-8 sterol isomerase; catalyzes isomerization of delta-8 double bond to delta-7 position at an intermediate step in ergosterol biosynthesis; transcriptionally down-regulated when ergosterol is in excess; mutation is functionally complemented by human EBP C-8 sterol isomerase ERG2
YMR158W	1.0663	1.91048e-19	4.51351e-18	126.473	115.79	56.623	63.091	No	MRPS8	Mitochondrial ribosomal protein of the small subunit mitochondrial 37S ribosomal protein MRPS8
YMR182C	1.06627	1.95039e-23	5.86018e-22	148.534	148.029	69.222	77.24	Yes	RGM1	Putative zinc finger DNA binding transcription factor; contains two N-terminal C2H2 zinc fingers and C-terminal proline rich domain; overproduction impairs cell growth and induces expression of genes involved in monosaccharide catabolism and aldehyde metabolism; regulates expression of of Y' telomeric elements and subtelomeric COS genes; relocalizes to the cytosol in response to hypoxia; RGM1 has…
YMR201C	1.06469	2.09406e-14	3.2118e-13	69.68	62.38	33.66	31.662	No	RAD14	Protein that recognizes and binds damaged DNA during NER; subunit of Nucleotide Excision Repair Factor 1 (NEF1); contains zinc finger motif; homolog of human XPA protein; NER stands for nucleotide excision repair Rad14p
YPR204W	1.06185	5.73653e-18	1.17931e-16	78.038	81.536	38.516	40.552	No	YPR204W	DNA helicase encoded within the telomeric Y' element; Y' -helicase protein 1 Y' element ATP-dependent helicase
YML112W	1.05631	1.47875e-19	3.5077e-18	94.44	98.621	49.671	46.266	No	CTK3	Gamma subunit of C-terminal domain kinase I; CTDK-I phosphorylates RNA polymerase II subunit Rpo21p to affect transcription and pre-mRNA 3' end processing, and also phosphorylates ribosomal protein Rps2p to increase translational fidelity; protein abundance increases in response to DNA replication stress Ctk3p
YML066C	1.05476	5.11731e-13	7.1728e-12	58.65	63.94	28.159	32.824	No	SMA2	Meiosis-specific prospore membrane protein; required to produce bending force necessary for proper assembly of the prospore membrane during sporulation Sma2p
YML016C	1.05325	3.08081e-24	9.5505e-23	128.67	131.752	65.919	63.814	No	PPZ1	Serine/threonine protein phosphatase Z, isoform of Ppz2p; involved in regulation of potassium transport, which affects osmotic stability, cell cycle progression, and halotolerance salt homeostasis regulator
YMR059W	1.0465	6.89392e-18	1.39763e-16	95.337	103.44	47.115	52.342	No	SEN15	Subunit of the tRNA splicing endonuclease; tRNA splicing endonuclease (Sen complex) is composed of Sen2p, Sen15p, Sen34p, and Sen54p; Sen complex also cleaves the CBP1 mRNA at the mitochondrial surface Sen15p
YML109W	1.04537	3.37549e-12	4.31812e-11	45.548	47.077	23.872	22.471	No	ZDS2	Protein with a role in regulating Swe1p-dependent polarized growth; involved in maintenance of Cdc55p in the cytoplasm where it promotes mitotic entry; interacts with silencing proteins at the telomere; implicated in the mitotic exit network through regulation of Cdc14p localization; ZDS2 has a paralog, ZDS1, that arose from the whole genome duplication Zds2p
YML097C	1.04439	6.87468e-15	1.09751e-13	62.586	62.454	32.387	30.259	No	VPS9	Guanine nucleotide exchange factor (GEF) and ubiquitin receptor; involved in vesicle-mediated vacuolar transport, including Golgi-endosome trafficking and sorting through the multivesicular body (MVB); stimulates the intrinsic guanine nucleotide exchange activity of Rab family members (Vps21p/Ypt52p/Ypt53p); partially redundant with GEF MUK1; required for localization of the CORVET complex to end…
YMR074C	1.04335	4.74855e-25	1.5331e-23	450.364	410.224	229.652	202.26	No	SDD2	Protein with homology to human PDCD5; PDCD5 is involved in programmed cell death; N-terminal region forms a conserved triple-helix bundle structure; overproduction suppresses lethality due to expression of the dominant PET9 allele AAC2-A128P; overexpression promotes H2O2-induced apoptosis; YMR074C is not an essential gene; protein abundance increases in response to DNA replication stress Sdd2p
YML011C	1.04328	3.26764e-17	6.29773e-16	95.005	98.751	45.205	52.007	No	RAD33	Protein involved in nucleotide excision repair; green fluorescent protein (GFP)-fusion protein localizes to the nucleus Rad33p
YMR033W	1.04305	3.45409e-17	6.63525e-16	78.343	84.294	39.738	41.843	No	ARP9	Component of both the SWI/SNF and RSC chromatin remodeling complexes; actin-related protein involved in transcriptional regulation Arp9p
YMR019W	1.04143	7.2879e-12	9.04657e-11	43.53	44.988	21.724	22.694	Yes	STB4	Putative transcription factor; contains a Zn(II)2Cys6 zinc finger domain characteristic of DNA-binding proteins; computational analysis suggests a role in regulation of expression of genes encoding transporters; binds Sin3p in a two-hybrid assay Stb4p
YMR273C	1.04141	1.10125e-12	1.48669e-11	64.362	60.291	33.889	28.787	No	ZDS1	Protein with a role in regulating Swe1p-dependent polarized growth; involved in maintaining Cdc55p in the cytoplasm where it promotes mitotic entry; involved in mitotic exit through Cdc14p regulation; interacts with silencing proteins at telomeres; has a role in Bcy1p localization; implicated in mRNA nuclear export; ZDS1 has a paralog, ZDS2, that arose from the whole genome duplication Zds1p
YMR003W	1.0405	9.0636e-17	1.65949e-15	72.128	72.158	36.419	36.146	No	AIM34	hypothetical protein; GFP-fusion protein localizes to the mitochondria; null mutant is viable and displays reduced frequency of mitochondrial genome loss Aim34p
YMR131C	1.04036	3.94065e-26	1.39929e-24	164.291	159.488	80.062	82.713	No	RRB1	Specific chaperone for ribosomal protein Rpl3p; binds to nascent Rpl3p during translation; essential gene ribosome biosynthesis protein RRB1
YMR256C	1.04023	0.00440894	0.0140163	673.161	873.997	471.859	305.542	No	COX7	Subunit VII of cytochrome c oxidase (Complex IV); Complex IV is the terminal member of the mitochondrial inner membrane electron transport chain cytochrome c oxidase subunit VII
YMR111C	1.03634	1.76553e-10	1.90501e-09	44.176	41.525	23.125	20.112	No	YMR111C	hypothetical protein; green fluorescent protein (GFP)-fusion protein localizes to the nucleus; YMR111C is not an essential gene; forms nuclear foci upon DNA replication stress hypothetical protein
YMR190C	1.03504	2.02065e-10	2.16831e-09	36.696	37.792	18.422	19.071	No	SGS1	RecQ family nucleolar DNA helicase; role in genome integrity maintenance, chromosome synapsis, meiotic joint molecule/crossover formation; stimulates activity of Top3p; rapidly lost in response to rapamycin in Rrd1p-dependent manner; forms nuclear foci upon DNA replication stress; yeast SGS1 complements mutations in human homolog BLM implicated in Bloom syndrome; also similar to human WRN implica…
YMR268C	1.03427	4.90284e-09	4.57417e-08	34.867	34.839	16.053	19.157	No	PRP24	Splicing factor that reanneals snRNPs during spliceosome recycling; reanneals U4 and U6 snRNPs U6 snRNP complex subunit PRP24
YML110C	1.03278	1.24859e-23	3.8301e-22	232.06	239.352	110.641	127.585	No	COQ5	2-hexaprenyl-6-methoxy-1,4-benzoquinone methyltransferase; involved in ubiquinone (Coenzyme Q) biosynthesis; localizes to the matrix face of the mitochondrial inner membrane in a large complex with other ubiquinone biosynthetic enzymes; respiratory defect of the null mutant is partially complemented by human COQ5 2-hexaprenyl-6-methoxy-1,4-benzoquinone methyltransferase
YML004C	1.03231	1.92728e-35	1.0963e-33	371.797	394.466	195.729	191.485	No	GLO1	Monomeric glyoxalase I; catalyzes the detoxification of methylglyoxal (a by-product of glycolysis) via condensation with glutathione to produce S-D-lactoylglutathione; expression regulated by methylglyoxal levels and osmotic stress lactoylglutathione lyase GLO1
YMR221C	1.03119	1.11966e-15	1.91816e-14	70.675	77.617	36.877	38.091	No	FMP42	hypothetical protein; the authentic, non-tagged protein is detected in highly purified mitochondria in high-throughput studies; physical interaction with Atg27p suggests a possible role in autophagy Fmp42p
YOL109W	1.03044	6.17155e-47	6.23433e-45	2426.51	2364.55	1238.99	1186.58	No	ZEO1	Peripheral membrane protein of the plasma membrane; interacts with Mid2p; regulates the cell integrity pathway mediated by Pkc1p and Slt2p; the authentic protein is detected in a phosphorylated state in highly purified mitochondria Zeo1p
YBL100W-B	1.02868	3.1158e-06	2.03064e-05	18.841	19.815	10.399	9.157	No	YBL101W-B	Retrotransposon TYA Gag and TYB Pol genes; transcribed/translated as one unit; polyprotein is processed to make a nucleocapsid-like protein (Gag), reverse transcriptase (RT), protease (PR), and integrase (IN); similar to retroviral genes gag-pol fusion protein
YMR242C	1.02777	7.04937e-45	6.3542e-43	2599.93	2691.95	1299.85	1383.92	No	RPL20A	Ribosomal 60S subunit protein L20A; homologous to mammalian ribosomal protein L18A, no bacterial homolog; RPL20A has a paralog, RPL20B, that arose from the whole genome duplication ribosomal 60S subunit protein L20A
YGL127C	1.02713	1.48692e-27	5.69404e-26	197.767	192.637	101.252	96.87	No	SOH1	Subunit of the RNA polymerase II mediator complex; associates with core polymerase subunits to form the RNA polymerase II holoenzyme; involved in telomere maintenance; conserved with other metazoan MED31 subunits Soh1p
YMR164C	1.02704	4.19743e-08	3.52837e-07	30.858	27.197	15.001	14.544	Yes	MSS11	Transcription factor; involved in regulation of invasive growth and starch degradation; controls the activation of FLO11 and STA2 in response to nutritional signals; forms a heterodimer with Flo8p that interacts with the Swi/Snf complex during transcriptional activation of FLO1, FLO11, and STA1 Mss11p
YHR096C	1.02704	4.11264e-19	9.23217e-18	119.111	136.153	64.001	65.38	No	HXT5	Hexose transporter with moderate affinity for glucose; induced in the presence of non-fermentable carbon sources, induced by a decrease in growth rate, contains an extended N-terminal domain relative to other HXTs; HXT5 has a paralog, HXT3, that arose from the whole genome duplication hexose transporter HXT5
YML037C	1.02121	7.30841e-05	0.000366609	15.138	14.253	8.404	6.575	No	YML037C	hypothetical protein; has some characteristics of a transcriptional activator; may be a target of Dbf2p-Mob1p kinase; GFP-fusion protein co-localizes with clathrin-coated vesicles; YML037C is not an essential gene hypothetical protein
YMR089C	1.01927	4.92873e-16	8.69803e-15	78.594	80.654	42.642	38.564	No	YTA12	Mitochondrial inner membrane m-AAA protease component; mediates degradation of misfolded or unassembled proteins; also required for correct assembly of mitochondrial enzyme complexes; overexpression of human AFG3L2 complements respiratory defect of yeast afg3 yta12 double null mutation, but overexpression of disease-associated AFG3L2 variants does not; expression of both human SPG7 (paraplegin) a…
YMR129W	1.01869	1.22558e-12	1.64317e-11	53.278	52.704	25.901	28.245	No	POM152	Glycoprotein subunit of transmembrane ring of nuclear pore complex; contributes to nucleocytoplasmic transport, nuclear pore complex (NPC) biogenesis and spindle pole body duplication; homologous to human NUP210 Pom152p
YMR172W	1.0172	4.15218e-13	5.86207e-12	54.453	52.853	27.352	27.531	Yes	HOT1	Transcription factor for glycerol biosynthetic genes; required for the transient induction of glycerol biosynthetic genes GPD1 and GPP2 in response to high osmolarity; targets Hog1p to osmostress responsive promoters; has similarity to Msn1p and Gcr1p Hot1p
YMR098C	1.01636	1.01912e-10	1.13517e-09	43.575	41.618	20.773	22.772	No	ATP25	Mitochondrial protein required for the stability of Oli1p (Atp9p) mRNA; also required for the Oli1p ring formation; YMR098C is not an essential gene Atp25p
YMR266W	1.01567	2.4247e-14	3.68636e-13	84.728	73.968	40.12	41.154	No	RSN1	Membrane hypothetical protein; overexpression suppresses NaCl sensitivity of sro7 mutant cells by restoring sodium pump (Ena1p) localization to the plasma membrane Rsn1p
YFR041C	1.01541	2.00401e-15	3.35471e-14	72.729	79.976	38.108	39.932	No	ERJ5	Type I membrane protein with a J domain; required to preserve the folding capacity of the endoplasmic reticulum; loss of the non-essential ERJ5 gene leads to a constitutively induced unfolded protein response Erj5p
YMR272C	1.01118	4.6239e-23	1.34783e-21	189.185	209.184	105.708	98.523	No	SCS7	Sphingolipid alpha-hydroxylase; functions in the alpha-hydroxylation of sphingolipid-associated very long chain fatty acids, has both cytochrome b5-like and hydroxylase/desaturase domains, not essential for growth fatty acid alpha-hydroxylase
YLR423C	1.00762	8.64275e-09	7.80244e-08	30.661	33.298	16.749	16.136	No	ATG17	Scaffold protein responsible for phagophore assembly site organization; regulatory subunit of an autophagy-specific complex that includes Atg1p and Atg13p; stimulates Atg1p kinase activity; human ortholog RB1CC1/FIP200 interacts with p53, which inhibits autophagy in human cells protein kinase regulatory subunit ATG17
YMR045C	1.00753	3.57722e-19	8.09224e-18	110.475	103.738	54.739	55.526	No	YMR045C	Retrotransposon TYA Gag and TYB Pol genes; transcribed/translated as one unit; polyprotein is processed to make a nucleocapsid-like protein (Gag), reverse transcriptase (RT), protease (PR), and integrase (IN); similar to retroviral genes gag-pol fusion protein
YMR139W	1.00245	2.24586e-20	5.67176e-19	123.074	132.94	67.744	64.27	No	RIM11	Protein kinase; required for signal transduction during entry into meiosis; promotes the formation of the Ime1p-Ume6p complex by phosphorylating Ime1p and Ume6p; shares similarity with mammalian glycogen synthase kinase 3-beta; protein abundance increases in response to DNA replication stress; RIM11 has a paralog, MRK1, that arose from the whole genome duplication serine/threonine protein kinase …
YCL040W	1.00165	3.24361e-43	2.53391e-41	865.593	859.874	451.111	440.064	No	GLK1	Glucokinase; catalyzes the phosphorylation of glucose at C6 in the first irreversible step of glucose metabolism; one of three glucose phosphorylating enzymes; expression regulated by non-fermentable carbon sources; GLK1 has a paralog, EMI2, that arose from the whole genome duplication glucokinase
YMR030W	1.00143	1.76995e-12	2.33036e-11	56.937	55.1	27.514	30.423	No	RSF1	Protein required for respiratory growth; localized to both the nucleus and mitochondrion; may interact with transcription factors to mediate the transition to respiratory growth and activate transcription of nuclear and mitochondrial genes Rsf1p
YGL229C	-1.00052	0.00252765	0.00875265	3.793	3.965	8.294	7.659	No	SAP4	Protein required for function of the Sit4p protein phosphatase; member of a family of similar proteins that form complexes with Sit4p, including Sap155p, Sap185p, and Sap190p; SAP4 has a paralog, SAP155, that arose from the whole genome duplication Sap4p
YDL242W	-1.00295	0.000558195	0.00228225	4.995	5.116	10.892	10.121	No	YDL242W	hypothetical protein; conserved across S. cerevisiae strains hypothetical protein
YDL218W	-1.0034	1.90095e-05	0.000107507	7.838	8.329	17.344	16.162	No	YDL218W	hypothetical protein; YDL218W transcription is regulated by Azf1p and induced by starvation and aerobic conditions; expression also induced in cells treated with the mycotoxin patulin hypothetical protein
YNL279W	-1.00586	2.79783e-06	1.84392e-05	9.927	9.926	19.593	21.567	No	PRM1	Pheromone-regulated multispanning membrane protein; involved in membrane fusion during mating; predicted to have 5 transmembrane segments and a coiled coil domain; localizes to the shmoo tip; regulated by Ste12p pheromone-regulated protein PRM1
YIL013C	-1.00965	0.000478756	0.00199504	4.834	5.924	11.613	10.758	No	PDR11	ATP-binding cassette (ABC) transporter; multidrug transporter involved in multiple drug resistance; mediates sterol uptake when sterol biosynthesis is compromised; regulated by Pdr1p; required for anaerobic growth; PDR11 has a paralog, AUS1, that arose from the whole genome duplication ATP-binding cassette multidrug transporter PDR11
YNR065C	-1.01212	1.25813e-08	1.1254e-07	19.595	21.022	47.09	37.591	No	YNR065C	hypothetical protein; protein-protein interactions suggest a possible role in actin patch formation; YNR065C is not an essential gene hypothetical protein
YLR329W	-1.0146	0.000132174	0.000628067	6.116	6.305	12.275	13.58	No	REC102	Protein involved in early stages of meiotic recombination; required for chromosome synapsis; forms a complex with Rec104p and Spo11p necessary during the initiation of recombination Rec102p
YLR413W	-1.01965	3.88482e-09	3.63596e-08	27.316	22.257	47.464	56.86	No	INA1	hypothetical protein; not an essential gene; YLR413W has a paralog, FAT3, that arose from the whole genome duplication Ina1p
YNL141W	-1.01984	2.08145e-17	4.10613e-16	39.36	39.863	82.057	83.97	No	AAH1	Adenine deaminase (adenine aminohydrolase); converts adenine to hypoxanthine; involved in purine salvage; transcriptionally regulated by nutrient levels and growth phase; Aah1p degraded upon entry into quiescence via SCF and the proteasome adenine deaminase
YEL073C	-1.02044	1.72261e-15	2.8919e-14	58.757	61.776	114.24	138.403	No	YEL073C	hypothetical protein; located adjacent to ARS503 and the telomere on the left arm of chromosome V; regulated by inositol/choline hypothetical protein
YDR446W	-1.02173	0.000244935	0.00109967	5.183	5.989	11.698	11.661	No	ECM11	Meiosis-specific protein; component of the Synaptonemal Complex (SC) along with Gmc2p; required for efficient crossover formation and for the efficient loading of the SC transverse filament protein, Zip1p; is SUMOlytaed in a Gmc2p manner, and SUMOylation is required for its function in meiosis; GFP fusion protein is present in discrete clusters in the nucleus throughout mitosis; may be involved i…
YOR011W	-1.02239	0.00302821	0.0102556	3.668	3.51	7.004	8.029	No	AUS1	Plasma membrane sterol transporter of the ATP-binding cassette family; required, along with Pdr11p, for uptake of exogenous sterols and their incorporation into the plasma membrane; activity is stimulated by phosphatidylserine; sterol uptake is required for anaerobic growth because sterol biosynthesis requires oxygen; AUS1 has a paralog, PDR11, that arose from the whole genome duplication ATP-bin…
YCR096C	-1.02522	4.07382e-06	2.59441e-05	10.205	14.188	24.152	26.911	No	HMRA2	Silenced copy of a2 at HMR; similarity to Alpha2p; required along with a1p for inhibiting expression of the HO endonuclease in a/alpha HO/HO diploid cells with an active mating-type interconversion system homeodomain mating type protein a2
YKL102C	-1.02923	4.72454e-06	2.96689e-05	8.376	9.016	18.43	18.262	No	YKL102C	hypothetical protein; conserved across S. cerevisiae strains; deletion confers sensitivity to citric acid; predicted protein would include a thiol-disulfide oxidoreductase active site hypothetical protein
YFL011W	-1.02973	0.00169672	0.00614025	4.125	3.891	9.126	7.806	No	HXT10	Putative hexose transporter; expressed at low levels and expression is repressed by glucose hexose transporter HXT10
YDR366C	-1.03177	1.72851e-14	2.66509e-13	31.262	30.679	68.058	63.108	No	YDR366C	hypothetical protein
YOR010C	-1.03296	2.33538e-09	2.24312e-08	15.326	16.092	33.55	32.824	No	TIR2	Putative cell wall mannoprotein; member of the Srp1p/Tip1p family of serine-alanine-rich proteins; transcription is induced by cold shock and anaerobiosis; TIR2 has a paralog, TIR3, that arose from the whole genome duplication putative GPI-anchored mannoprotein
YNR067C	-1.03615	1.75143e-09	1.71886e-08	19.388	16.472	38.049	38.185	No	DSE4	Daughter cell-specific secreted protein with similarity to glucanases; degrades cell wall from the daughter side causing daughter to separate from mother endo-1,3(4)-beta-glucanase
YDR036C	-1.03684	7.72185e-12	9.56497e-11	21.514	22.48	47.964	45.44	No	EHD3	3-hydroxyisobutyryl-CoA hydrolase; member of a family of enoyl-CoA hydratase/isomerases; non-tagged protein is detected in highly purified mitochondria in high-throughput studies; phosphorylated; mutation affects fluid-phase endocytosis Ehd3p
YEL035C	-1.04897	0.000209344	0.000951548	7.345	5.172	13.464	13.546	No	UTR5	hypothetical protein; transcription may be regulated by Gcr1p; essential for growth under standard (aerobic) conditions but not under anaerobic conditions Utr5p
YHR022C	-1.0503	1.11916e-06	7.85286e-06	9.111	10.251	20.697	20.508	No	YHR022C	hypothetical protein; YHR022C is not an essential gene hypothetical protein
YOR237W	-1.05063	1.63068e-05	9.35762e-05	7.004	7.865	16.495	15.388	No	HES1	Protein implicated in the regulation of ergosterol biosynthesis; one of a seven member gene family with a common essential function and non-essential unique functions; similar to human oxysterol binding protein (OSBP); SWAT-GFP and mCherry fusion proteins localize to the bud neck and vacuolar membrane; HES1 has a paralog, KES1, that arose from the whole genome duplication oxysterol-binding protei…
YLL042C	-1.0509	0.0173142	0.0453685	2.116	5.302	7.683	7.986	No	ATG10	Conserved E2-like conjugating enzyme; mediates formation of the Atg12p-Atg5p conjugate, which is a critical step in autophagy E2-like conjugating enzyme
YPR157W	-1.0512	7.23688e-05	0.000363956	5.999	6.026	12.615	13.116	No	TDA6	hypothetical protein; induced by treatment with 8-methoxypsoralen and UVA irradiation; null mutant is sensitive to expression of the top1-T722A allele; SWAT-GFP and mCherry fusion proteins localize to the cell periphery and vacuole; TDA6 has a paralog, VPS62, that arose from the whole genome duplication Tda6p
YLL028W	-1.0567	5.78187e-17	1.07543e-15	37.019	40.782	86.073	81.078	No	TPO1	Polyamine transporter of the major facilitator superfamily; member of the 12-spanner drug:H(+) antiporter DHA1 family; recognizes spermine, putrescine, and spermidine; catalyzes uptake of polyamines at alkaline pH and excretion at acidic pH; during oxidative stress exports spermine, spermidine from the cell, which controls timing of expression of stress-responsive genes; phosphorylation enhances …
YHR054C	-1.0602	4.33709e-26	1.52162e-24	71.796	72.622	159.293	152.113	No	YHR054C	hypothetical protein; partial duplicate of RSC30/YHR056C, truncated remnant of segmental duplication hypothetical protein
YKL062W	-1.06577	5.07563e-10	5.29148e-09	17.155	20.855	42.175	39.924	Yes	MSN4	Stress-responsive transcriptional activator; activated in stochastic pulses of nuclear localization in response to various stress conditions; binds DNA at stress response elements of responsive genes, inducing gene expression; involved in diauxic shift stress-responsive transcriptional activator MSN4
YDR380W	-1.0783	2.63447e-12	3.39986e-11	21.352	20.159	44.518	46.327	No	ARO10	Phenylpyruvate decarboxylase; catalyzes decarboxylation of phenylpyruvate to phenylacetaldehyde, which is the first specific step in the Ehrlich pathway; involved in protein N-terminal Met and Ala catabolism phenylpyruvate decarboxylase ARO10
YLL053C	-1.07844	2.3271e-14	3.55064e-13	25.504	26.259	54.739	58.169	No	YLL053C	Putative protein; in the Sigma 1278B strain background YLL053C is contiguous with AQY2 which encodes an aquaporin hypothetical protein
YHR029C	-1.08085	2.57529e-10	2.7285e-09	16.51	19.722	38.898	40.182	No	YHI9	hypothetical protein; null mutant is defective in unfolded protein response; possibly involved in a membrane regulation metabolic pathway; member of the PhzF superfamily, though most likely not involved in phenazine production Yhi9p
YOL015W	-1.08148	4.0618e-07	2.98971e-06	9.551	9.434	21.181	20.448	No	IRC10	hypothetical protein; subunit of the leading edge protein (LEP) complex (Ssp1-Ady3-Don1-Irc10) that forms a ring-like structure at the leading edge of the prospore membrane during meiosis II; null mutant displays increased levels of spontaneous Rad52p foci Irc10p
YGL196W	-1.08487	1.93259e-14	2.97193e-13	25.836	26.362	59.348	55.156	No	DSD1	D-serine dehydratase (aka D-serine ammonia-lyase); converts D-serine to pyruvate and ammonia by a reaction dependent on pyridoxal 5'-phosphate and zinc; may play a role in D-serine detoxification; L-serine is not a substrate D-serine ammonia-lyase DSD1
YGR041W	-1.08693	1.37474e-11	1.65392e-10	21.2	18.831	43.007	45.01	No	BUD9	Protein involved in bud-site selection; mutant has increased aneuploidy tolerance; diploid mutants display a unipolar budding pattern instead of the wild-type bipolar pattern, and bud at the distal pole; BUD9 has a paralog, BUD8, that arose from the whole genome duplication Bud9p
YNL327W	-1.08713	9.95429e-16	1.72042e-14	42.839	37.718	83.263	93.953	No	EGT2	Glycosylphosphatidylinositol (GPI)-anchored cell wall endoglucanase; required for proper cell separation after cytokinesis; expression is activated by Swi5p and tightly regulated in a cell cycle-dependent manner Egt2p
YBR072W	-1.0879	1.48252e-46	1.44768e-44	955.262	1037.52	2220.22	2158.87	No	HSP26	Small heat shock protein (sHSP) with chaperone activity; forms hollow, sphere-shaped oligomers that suppress unfolded proteins aggregation; long-lived protein that is preferentially retained in mother cells and forms cytoplasmic foci; oligomer activation requires heat-induced conformational change; also has mRNA binding activity chaperone protein HSP26
YDR497C	-1.08966	8.64376e-22	2.35553e-20	215.587	174.539	435.16	424.418	No	ITR1	Myo-inositol transporter; member of the sugar transporter superfamily; expression is repressed by inositol and choline via Opi1p and derepressed via Ino2p and Ino4p; relative distribution to the vacuole increases upon DNA replication stress; ITR1 has a paralog, ITR2, that arose from the whole genome duplication myo-inositol transporter ITR1
YNL169C	-1.09393	9.0659e-19	1.96004e-17	52.453	46.91	104.537	115.055	No	PSD1	Phosphatidylserine decarboxylase of the mitochondrial inner membrane; converts phosphatidylserine to phosphatidylethanolamine; regulates mitochondrial fusion and morphology by affecting lipid mixing in the mitochondrial membrane and by influencing the ratio of long to short forms of Mgm1p; partly exposed to the mitochondrial intermembrane space; autocatalytically processed phosphatidylserine deca…
YLR037C	-1.09486	4.33946e-08	3.63213e-07	24.043	18.283	52.837	40.913	No	PAU23	Cell wall mannoprotein; has similarity to Tir1p, Tir2p, Tir3p, and Tir4p; member of the seripauperin multigene family encoded mainly in subtelomeric regions; expressed under anaerobic conditions, completely repressed during aerobic growth seripauperin PAU23
YAR068W	-1.09812	1.749e-08	1.53404e-07	14.205	19.462	37.183	37.023	No	YAR068W	Fungal-specific hypothetical protein; induced in respiratory-deficient cells; YAR068W has a paralog, YHR214W-A, that arose from a segmental duplication hypothetical protein
YHR210C	-1.09861	5.17796e-07	3.76398e-06	9.524	10.465	23.863	20.25	No	YHR210C	Putative aldose 1-epimerase superfamily protein; non-essential gene; highly expressed under anaeorbic conditions aldose 1-epimerase superfamily protein
YGR177C	-1.09932	3.63976e-08	3.09063e-07	11.326	12.489	24.661	27.849	No	ATF2	Alcohol acetyltransferase; may play a role in steroid detoxification; forms volatile esters during fermentation, which is important for brewing and winemaking alcohol O-acetyltransferase
YCR025C	-1.09962	9.36068e-11	1.04665e-09	16.07	17.234	38.312	35.517	No	YCR025C	hypothetical protein; conserved across S. cerevisiae strains; YCR025C is not an essential gene hypothetical protein
YLL056C	-1.10157	9.00331e-16	1.56066e-14	30.042	30.689	70.936	63.84	No	YLL056C	hypothetical protein; transcription is activated by paralogous transcription factors Yrm1p and Yrr1p and genes involved in pleiotropic drug resistance (PDR); expression is induced in cells treated with the mycotoxin patulin; SWAT-GFP and mCherry fusion proteins localize to the endoplasmic reticulum and vacuole respectively hypothetical protein
YLR058C	-1.11075	1.99302e-12	2.61157e-11	48.677	62.751	109.97	138.403	No	SHM2	Cytosolic serine hydroxymethyltransferase; converts serine to glycine plus 5,10 methylenetetrahydrofolate; major isoform involved in generating precursors for purine, pyrimidine, amino acid, and lipid biosynthesis glycine hydroxymethyltransferase SHM2
YBR177C	-1.11155	2.54822e-29	1.06643e-27	73.429	71.87	160.235	164.609	No	EHT1	Acyl-coenzymeA:ethanol O-acyltransferase; plays a minor role in medium-chain fatty acid ethyl ester biosynthesis; possesses short-chain esterase activity; localizes to lipid particles and the mitochondrial outer membrane; EHT1 has a paralog, EEB1, that arose from the whole genome duplication medium-chain fatty acid ethyl ester synthase/esterase
YOR032C	-1.11155	1.55804e-09	1.53939e-08	12.959	13.492	30.196	28.813	Yes	HMS1	bHLH protein with similarity to myc-family transcription factors; overexpression confers hyperfilamentous growth and suppresses the pseudohyphal filamentation defect of a diploid mep1 mep2 homozygous null mutant Hms1p
YPR071W	-1.11297	6.93658e-09	6.3206e-08	15.81	12.953	33.685	30.784	No	YPR071W	Putative membrane protein; YPR071W is not an essential gene; YPR071W has a paralog, YIL029C, that arose from a single-locus duplication hypothetical protein
YIL066C	-1.11352	0.000111476	0.00053712	4.878	4.875	10.985	10.973	No	RNR3	Minor isoform of large subunit of ribonucleotide-diphosphate reductase; the RNR complex catalyzes rate-limiting step in dNTP synthesis, regulated by DNA replication and DNA damage checkpoint pathways via localization of small subunits; RNR3 has a paralog, RNR1, that arose from the whole genome duplication ribonucleotide-diphosphate reductase subunit RNR3
YGL016W	-1.11507	2.72008e-06	1.79673e-05	7.389	7.326	16.656	16.377	No	KAP122	Karyopherin beta; responsible for import of the Toa1p-Toa2p complex into the nucleus; binds to nucleoporins Nup1p and Nup2p; may play a role in regulation of pleiotropic drug resistance Kap122p
YJL043W	-1.11984	0.00142418	0.0052579	3.139	3.371	7.521	7.083	No	YJL043W	hypothetical protein; YJL043W is a non-essential gene hypothetical protein
YNL127W	-1.12315	7.34172e-08	5.97432e-07	11.246	9.648	23.609	23.675	No	FAR11	Protein involved in recovery from cell cycle arrest; acts in response to pheromone; also involved in regulation of intra-S DNA damage checkpoint and autophagy; is essential for dephosphorylation of Atg13p; interacts with Far3p, Far7p, Far8p, Far9p, Far10p and with the phosphatases Pph21p, Pph22p and Pph3p; has similarity to the N- and C-termini of N. crassa HAM-2; similar to human Fam40A and Fam4…
YGL258W	-1.12765	0.000423962	0.00179091	4.098	3.946	8.472	9.785	No	VEL1	hypothetical protein; highly induced in zinc-depleted conditions and has increased expression in NAP1 deletion mutants; VEL1 has a paralog, YOR387C, that arose from a single-locus duplication Vel1p
YNL270C	-1.12967	8.41364e-06	5.08201e-05	6.681	6.463	15.79	14.054	No	ALP1	Arginine transporter; expression is normally very low and it is unclear what conditions would induce significant expression; ALP1 has a paralog, CAN1, that arose from the whole genome duplication arginine permease ALP1
YGR052W	-1.13047	3.4714e-06	2.2326e-05	7.067	9.313	17.743	19.123	No	FMP48	hypothetical protein; the authentic, non-tagged protein is detected in highly purified mitochondria in high-throughput studies; induced by treatment with 8-methoxypsoralen and UVA irradiation protein kinase FMP48
YDL049C	-1.13088	7.22647e-08	5.90514e-07	9.82	10.363	21.571	24.071	No	KNH1	Protein with similarity to Kre9p; Kre9p is involved in cell wall beta 1,6-glucan synthesis; overproduction suppresses growth defects of a kre9 null mutant; required for propionic acid resistance Knh1p
YDL244W	-1.13495	0.00146454	0.00538991	3.094	3.111	7.106	6.937	No	THI13	Protein involved in synthesis of the thiamine precursor HMP; member of a subtelomeric gene family including THI5, THI11, THI12, and THI13; hydroxymethylpyrimidine is also known as HMP 4-amino-5-hydroxymethyl-2-methylpyrimidine phosphate synthase
YNL259C	-1.13636	3.36025e-25	1.10605e-23	78.531	91.926	197.061	189.807	No	ATX1	Cytosolic copper metallochaperone; transports copper to the secretory vesicle copper transporter Ccc2p for eventual insertion into Fet3p, which is a multicopper oxidase required for high-affinity iron uptake; human homolog ATOX1 can complement yeast atx1 mutant; overexpression of human ATOX1 suppresses lysine auxotrophy of the yeast sod1 null mutant, as does overexpression of yeast ATX1 copper me…
YOL085C	-1.13798	0.000113272	0.000543984	6.564	5.153	11.477	15.431	No	YOL085C	hypothetical protein; conserved among S. cerevisiae strains; YOL085C is not an essential gene; partially overlaps dubious ORF YOL085W-A hypothetical protein
YOL154W	-1.13924	3.09201e-18	6.42415e-17	38.122	40.773	83.704	95.846	No	ZPS1	Putative GPI-anchored protein; transcription is induced under low-zinc conditions, as mediated by the Zap1p transcription factor, and at alkaline pH Zps1p
YGR212W	-1.13972	2.44855e-08	2.11594e-07	11.201	10.065	24.738	23.77	No	SLI1	N-acetyltransferase; confers resistance to the sphingolipid biosynthesis inhibitor myriocin (ISP-1) by converting it into N-acetyl-myriocin, co-operates with Ypk1p in mediating resistance to myriocin N-acetyltransferase
YPR013C	-1.14019	4.1275e-12	5.2457e-11	20.985	22.22	53.678	44.76	No	CMR3	Putative zinc finger protein; YPR013C is not an essential gene Cmr3p
YIL114C	-1.14164	1.22076e-12	1.64047e-11	18.626	18.441	43.898	40.586	No	POR2	Putative mitochondrial porin (voltage-dependent anion channel); not required for mitochondrial membrane permeability or mitochondrial osmotic stability; POR2 has a paralog, POR1, that arose from the whole genome duplication putative porin POR2
YDR009W	-1.14306	1.37109e-05	7.97736e-05	5.999	6.008	14.406	13.038	Yes	GAL3	Transcriptional regulator; involved in activation of the GAL genes in response to galactose; forms a complex with Gal80p to relieve Gal80p inhibition of Gal4p; binds galactose and ATP but does not have galactokinase activity; GAL3 has a paralog, GAL1, that arose from the whole genome duplication transcriptional regulator GAL3
YIL009W	-1.15202	1.59627e-06	1.1042e-05	8.349	7.168	19.058	16.877	No	FAA3	Long chain fatty acyl-CoA synthetase; activates imported fatty acids with a preference for C16:0-C18:0 chain lengths; green fluorescent protein (GFP)-fusion protein localizes to the cell periphery long-chain fatty acid-CoA ligase FAA3
YHR139C	-1.1524	1.47522e-05	8.5408e-05	6.188	5.506	13.345	13.494	No	SPS100	Protein required for spore wall maturation; expressed during sporulation; may be a component of the spore wall; expression also induced in cells treated with the mycotoxin patulin; SPS100 has a paralog, YGP1, that arose from the whole genome duplication Sps100p
YBL048W	-1.15653	9.73152e-06	5.81806e-05	9.022	9.044	16.622	25.113	No	RRT1	hypothetical protein; conserved across S. cerevisiae strains; identified in a screen for mutants with increased levels of rDNA transcription Rrt1p
YKR104W	-1.1612	5.37534e-06	3.35758e-05	6.152	6.732	14.135	15.629	No	NFT1	Putative transporter of the MRP subfamily; contains a stop codon in S288C; adjacent ORFs YKR103W and YKR104W are merged in different strain backgrounds; MRP stands for multidrug resistance-associated protein hypothetical protein
YLR341W	-1.16148	5.78514e-05	0.000297326	5.013	4.68	11.469	10.964	No	SPO77	Meiosis-specific hypothetical protein; required for spore wall formation during sporulation and for timely prospore membrane closure along with SPS1; required with Sps1p for phosphorylation and turnover of Ssp1p; dispensable for both nuclear divisions during meiosis Spo77p
YCR050C	-1.16263	9.77866e-14	1.43953e-12	31.719	32.769	83.611	65.639	No	YCR050C	Non-essential hypothetical protein; deletion mutant is synthetically sick or lethal with alpha-synuclein hypothetical protein
YPL041C	-1.16332	5.41576e-12	6.81368e-11	15.694	16.064	35.876	37.72	No	MRX11	Protein that associates with mitochondrial ribosome; SWAT-GFP and mCherry fusion proteins localize to the mitochondria; involved in maintenance of telomere length Mrx11p
YOR183W	-1.17353	0.0129614	0.0354533	2.556	2.656	8.319	3.847	No	FYV12	hypothetical protein; required for survival upon exposure to K1 killer toxin Fyv12p
YDR539W	-1.17834	7.27549e-08	5.92866e-07	8.573	9.805	20.553	22.341	No	FDC1	Ferulic acid decarboxylase, also active on p-coumaric acid; essential for decarboxylation of aromatic carboxylic acids to corresponding vinyl derivatives; co-overproduction of Pad1p and Fdc1p greatly increases cinnamic acid decarboxylase activity; structure implicates Glu285 as the general base in the nonoxidative decarboxylation reaction catalyzed by Fdc1p; homolog of E. coli UbiD; GFP-fusion pr…
YDR305C	-1.1796	3.64755e-11	4.21518e-10	13.855	15.237	35.375	32.755	No	HNT2	Dinucleoside triphosphate hydrolase; has similarity to the tumor suppressor FHIT and belongs to the histidine triad (HIT) superfamily of nucleotide-binding proteins bis(5'-adenosyl)-triphosphatase
YKL043W	-1.1822	8.43143e-22	2.3084e-20	40.454	45.703	103.917	97.903	Yes	PHD1	Transcriptional activator that enhances pseudohyphal growth; physically interacts with the Tup1-Cyc8 complex and recruits Tup1p to its targets; regulates expression of FLO11, an adhesin required for pseudohyphal filament formation; similar to StuA, an A. nidulans developmental regulator; potential Cdc28p substrate; PHD1 has a paralog, SOK2, that arose from the whole genome duplication Phd1p
YJL038C	-1.18272	2.83947e-13	4.05767e-12	17.155	17.921	40.078	42.333	No	LOH1	Protein involved in outer spore wall assembly; likely involved directly in dityrosine layer assembly; induced during sporulation; repressed during vegetative growth by Sum1p and Hst1p; sequence similar to adjacent ORF, IRC18/YJL037W, and the irc18 loh1 double mutant exhibits reduced dityrosine fluorescence relative to the single mutants; SWAT-GFP and mCherry fusion proteins localize to the cytoso…
YHL016C	-1.18389	5.35383e-08	4.43679e-07	10.161	8.561	21.894	22.359	No	DUR3	Plasma membrane transporter for both urea and polyamines; expression is highly sensitive to nitrogen catabolite repression and induced by allophanate, the last intermediate of the allantoin degradative pathway Dur3p
YKL161C	-1.18411	4.33528e-17	8.22019e-16	25.702	26.148	63.483	58.349	No	KDX1	Protein kinase; implicated in Slt2p mitogen-activated (MAP) kinase signaling pathway; interacts with numerous components in the mating pheromone and CWI MAPK pathways; associates with Rlm1p; KDX1 has a paralog, SLT2, that arose from the whole genome duplication putative protein kinase KDX1
YGL230C	-1.19308	1.71927e-06	1.17815e-05	7.928	6.862	15.858	19.329	No	YGL230C	hypothetical protein; non-essential gene hypothetical protein
YPR064W	-1.19355	7.80062e-08	6.30225e-07	8.439	9.908	22.819	20.345	No	YPR064W	hypothetical protein; conserved among S. cerevisiae strains; YPR064W is not an essential gene hypothetical protein
YEL033W	-1.20441	6.94001e-06	4.23999e-05	17.424	10.418	27.599	39.14	No	MTC7	hypothetical protein; predicted metabolic role based on network analysis derived from ChIP experiments, a large-scale deletion study and localization of transcription factor binding sites; null mutant is sensitive to temperature oscillation in a cdc13-1 mutant Mtc7p
YOR351C	-1.2049	0.0128667	0.0352932	2	1.402	3.981	4.105	No	MEK1	Meiosis-specific serine/threonine protein kinase; functions in meiotic checkpoint, promotes recombination between homologous chromosomes by suppressing double strand break repair between sister chromatids; stabilizes Hop1-Thr318 phosphorylation to promote interhomolog recombination and checkpoint responses during meiosis serine/threonine protein kinase MEK1
YOL157C	-1.21239	0.00237941	0.00827356	2.359	2.628	6.443	5.422	No	IMA2	Isomaltase (alpha-1,6-glucosidase/alpha-methylglucosidase); preferred specificity for isomaltose, alpha-methylglucoside, and palatinose, but also exhibits alpha-1,2 glucosidase activity on sucrose and kojibiose, and can cleave the 1,3-alpha linkage of nigerose and turanose and the alpha-1,5 linkage of leucrose in vitro; not required for isomaltose utilization, but Ima2p overexpression allows the …
YJL157C	-1.21552	1.04624e-14	1.65674e-13	18.536	18.097	44.586	43.426	No	FAR1	CDK inhibitor and nuclear anchor; during the cell cycle Far1p sequesters the GEF Cdc24p in the nucleus; phosphorylation by Cdc28p-Cln results in SCFCdc4 complex-mediated ubiquitin-dependent degradation, releasing Cdc24p for export and activation of GTPase Cdc42p; in response to pheromone, phosphorylation of Far1p by MAPK Fus3p results in association with, and inhibition of Cdc28p-Cln, as well as …
YHR136C	-1.21574	1.36294e-05	7.93784e-05	5.219	7.001	15.858	13.185	No	SPL2	Protein with similarity to cyclin-dependent kinase inhibitors; downregulates low-affinity phosphate transport during phosphate limitation by targeting Pho87p to the vacuole; upstream region harbors putative hypoxia response element (HRE) cluster; overproduction suppresses a plc1 null mutation; promoter shows an increase in Snf2p occupancy after heat shock; GFP-fusion protein localizes to the cyto…
YIR027C	-1.21937	7.84809e-08	6.32489e-07	9.47	9.109	24.882	19.889	No	DAL1	Allantoinase; converts allantoin to allantoate in the first step of allantoin degradation; expression sensitive to nitrogen catabolite repression allantoinase
YKL220C	-1.23161	0.000536089	0.00220417	3.749	2.776	8.447	7.582	No	FRE2	Ferric reductase and cupric reductase; reduces siderophore-bound iron and oxidized copper prior to uptake by transporters; expression induced by low iron levels but not by low copper levels ferric/cupric-chelate reductase
snR81	-1.23474	0.000423427	0.00178994	6.304	8.979	12.114	24.889	No	snR81	- -
YOL160W	-1.24372	9.52741e-05	0.000465564	4.565	4.364	9.109	12.685	No	YOL160W	hypothetical protein; conserved across S. cerevisiae strains hypothetical protein
YPR009W	-1.24793	4.76002e-12	6.01056e-11	13.703	12.823	33.295	31.963	Yes	SUT2	Zn2Cys6 family transcription factor; positively regulates sterol uptake under anaerobic conditions with SUT1; represses filamentation-inducing genes during non-starvation conditions; positively regulates mating along with SUT1 by repressing the expression of genes (PRR2, NCE102 and RHO5) which function as mating inhibitors; multicopy suppressor of mutations that cause low activity of the cAMP/PKA…
YGL081W	-1.24855	1.48232e-07	1.16079e-06	8.896	7.076	20.374	19.011	No	YGL081W	hypothetical protein; non-essential gene; interacts genetically with CHS5, a gene involved in chitin biosynthesis hypothetical protein
YJL077C	-1.24857	1.72437e-11	2.05766e-10	32.777	22.582	71.802	64.83	No	ICS3	Protein with a role in copper homeostasis; possible role in vacuolar sorting and processing of secretory proteins; null mutants are hypersensitive to sortin2 Ics3p
YLL052C	-1.252	8.65816e-10	8.76134e-09	10.152	9.592	24.644	24.114	No	AQY2	Water channel that mediates water transport across cell membranes; only expressed in proliferating cells; controlled by osmotic signals; may be involved in freeze tolerance; disrupted by a stop codon in many S. cerevisiae strains Aqy2p
YBR209W	-1.2523	0.0041908	0.0133955	2.054	1.913	5.263	4.527	No	YBR209W	hypothetical protein; conserved across S. cerevisiae strains; YBR209W is not an essential gene hypothetical protein
YKL096W	-1.25289	2.68962e-35	1.50081e-33	165.035	195.413	435.78	451.665	No	CWP1	Cell wall mannoprotein that localizes to birth scars of daughter cells; linked to a beta-1,3- and beta-1,6-glucan heteropolymer through a phosphodiester bond; required for propionic acid resistance Cwp1p
YDL239C	-1.26704	2.63196e-05	0.000145891	4.143	4.29	10.314	10.577	No	ADY3	Protein required for spore wall formation; subunit of the leading edge protein (LEP) complex (Ssp1-Ady3-Don1-Irc10) that forms a ring-like structure at the leading edge of the prospore membrane during meiosis II; mediates assembly of the LEP complex, formation of the ring-like structure via interaction with spindle pole body components and prospore membrane maturation; potentially phosphorylated …
YIR032C	-1.26843	5.90058e-12	7.38707e-11	14.268	12.424	34.331	32.488	No	DAL3	Ureidoglycolate lyase; converts ureidoglycolate to glyoxylate and urea in the third step of allantoin degradation; expression is sensitive to nitrogen catabolite repression; this enzyme is sometimes referred to 'ureidoglycolate hydrolase' but should not be confused with the Arabidopsis thaliana ureidoglycolate hydrolase enzyme which converts ureidoglycolate to glyoxylate, ammonia and carbon dioxi…
YNL196C	-1.27019	1.02463e-10	1.13914e-09	11.353	12.183	27.14	31.438	No	SLZ1	Sporulation-specific protein with a leucine zipper motif; subunit of the MIS complex which controls mRNA methylation during during the induction of sporulation Slz1p
YGR066C	-1.27461	6.01237e-15	9.6511e-14	15.891	16.89	40.57	41.387	No	YGR066C	hypothetical protein
YIL051C	-1.27741	6.83676e-45	6.25884e-43	466.291	489.736	1116.74	1279.36	No	MMF1	Mitochondrial protein required for transamination of isoleucine; but not of valine or leucine; may regulate specificity of branched-chain transaminases Bat1p and Bat2p; induction of expression in response to stress is mediated by a Hog1p-regulated antisense RNA and gene looping; interacts genetically with mitochondrial ribosomal protein genes; MMF1 has a paralog, HMF1, that arose from the whole g…
YOL155C	-1.27858	6.44788e-25	2.05316e-23	33.378	33.029	81.803	84.865	No	HPF1	Haze-protective mannoprotein; reduces the particle size of aggregated proteins in white wines mannoprotein
YIR029W	-1.28172	8.7298e-13	1.18403e-11	13.819	13.835	36.665	32.884	No	DAL2	Allantoicase; converts allantoate to urea and ureidoglycolate in the second step of allantoin degradation; expression sensitive to nitrogen catabolite repression and induced by allophanate, an intermediate in allantoin degradation allantoicase
YIL057C	-1.28332	2.10703e-08	1.83434e-07	8.448	9.239	24.568	19.751	No	RGI2	hypothetical protein; involved in energy metabolism under respiratory conditions; expression induced under carbon limitation and repressed under high glucose; RGI2 has a paralog, RGI1, that arose from the whole genome duplication Rgi2p
YNL012W	-1.28578	7.95522e-08	6.38488e-07	7.049	7.382	16.809	19.476	No	SPO1	Meiosis-specific prospore protein; required for meiotic spindle pole body duplication and separation; required to produce bending force necessary for proper prospore membrane assembly during sporulation; has similarity to phospholipase B putative carboxylic ester hydrolase
YHR015W	-1.28724	0.000903276	0.00351414	2.646	2.34	6.24	6.291	No	MIP6	Putative RNA-binding protein; interacts with Mex67p, which is a component of the nuclear pore involved in nuclear mRNA export; MIP6 has a paralog, PES4, that arose from the whole genome duplication Mip6p
YGR131W	-1.28856	1.37199e-10	1.49972e-09	14.34	21.19	43.677	45.69	No	FHN1	hypothetical protein; induced by ketoconazole; promoter region contains sterol regulatory element motif, which has been identified as a Upc2p-binding site; overexpression complements function of Nce102p in NCE102 deletion strain; FHN1 has a paralog, NCE102, that arose from the whole genome duplication Fhn1p
YJL089W	-1.2965	3.63855e-06	2.32732e-05	4.681	5.534	12.318	13.572	Yes	SIP4	C6 zinc cluster transcriptional activator; binds to the carbon source-responsive element (CSRE) of gluconeogenic genes; involved in the positive regulation of gluconeogenesis; regulated by Snf1p protein kinase; localized to the nucleus Sip4p
YKR005C	-1.30638	2.32654e-05	0.000130069	3.91	3.946	10.06	9.992	No	YKR005C	hypothetical protein
YDR525W	-1.30904	0.000630768	0.00254874	3.426	2.6	9.211	6.36	No	API2	hypothetical protein; conserved among S. cerevisiae strains; not conserved in closely related Saccharomyces species; 26% of ORF overlaps the dubious ORF YDR524C-A; insertion mutation in a cdc34-2 mutant background causes altered bud morphology Api2p
YNR060W	-1.31195	5.42992e-07	3.94224e-06	6.035	5.348	14.907	14.355	No	FRE4	Ferric reductase; reduces a specific subset of siderophore-bound iron prior to uptake by transporters; expression induced by low iron levels ferric-chelate reductase
YLL055W	-1.31478	7.30753e-13	1.00269e-11	13.425	12.675	35.341	31.86	No	YCT1	High-affinity cysteine-specific transporter; has similarity to the Dal5p family of transporters; green fluorescent protein (GFP)-fusion protein localizes to the endoplasmic reticulum; YCT1 is not an essential gene Yct1p
YJL027C	-1.31607	0.00417947	0.0133885	1.489	3.352	5.951	6.274	No	YJL027C	hypothetical protein
YEL057C	-1.3176	8.54899e-14	1.26168e-12	13.954	14.42	38.405	34.536	No	SDD1	hypothetical protein; overproduction suppresses lethality due to expression of the dominant PET9 allele AAC2-A128P; may have a role in telomere maintenance; target of UME6 regulation Sdd1p
YJL216C	-1.32566	0.00380713	0.0123853	2.09	1.532	4.347	5.181	No	IMA5	Alpha-glucosidase; specificity for isomaltose, maltose, and palatinose, but not alpha-methylglucoside; most distant member of the IMA isomaltase family, but with similar catalytic properties as Ima1p and Ima2p; not required for isomaltose utilization, but Ima5p overexpression allows the ima1 null mutant to grow on isomaltose; can cleave alpha-1,3 linkage of nigerose and turanose and alpha-1,5 lin…
YDR044W	-1.33365	8.64137e-36	5.06298e-34	60.04	67.617	165.21	167.044	No	HEM13	Coproporphyrinogen III oxidase; oxygen-requiring enzyme that catalyzes sixth step in heme biosynthetic pathway; transcription is repressed by oxygen and heme (via Rox1p and Hap1p); human homolog CPOX can complement yeast mutant and allow growth of haploid null after sporulation of a heterozygous diploid coproporphyrinogen oxidase
YJL045W	-1.3387	2.15133e-06	1.44218e-05	4.421	5.506	12.649	13.167	No	YJL045W	Minor succinate dehydrogenase isozyme; participates in oxidation of succinate and transfer of electrons to ubiquinone; induced during the diauxic shift in a Cat8p-dependent manner; YJL045W has a paralog, SDH1, that arose from the whole genome duplication succinate dehydrogenase SDH1b
YPR002W	-1.33939	1.23285e-09	1.23054e-08	7.847	9.072	22.794	21.309	No	PDH1	Putative 2-methylcitrate dehydratase; mitochondrial protein that participates in respiration; induced by diauxic shift; homologous to E. coli PrpD, may take part in the conversion of 2-methylcitrate to 2-methylisocitrate putative 2-methylcitrate dehydratase
YHR021W-A	-1.33972	1.18666e-05	6.9946e-05	3.937	4.791	10.255	12.53	No	ECM12	hypothetical protein; may contribute to cell wall biosynthesis, mutants display zymolyase hypersensitivity Ecm12p
YPL027W	-1.35084	2.70419e-05	0.000149329	3.345	4.522	10.849	9.63	No	SMA1	hypothetical protein involved in prospore membrane assembly; involved in the assembly of the prospore membrane during sporulation; interacts with Spo14p Sma1p
YAR031W	-1.35704	4.82976e-10	5.05314e-09	8.528	8.756	21.325	24.502	No	PRM9	Pheromone-regulated protein; contains 3 predicted transmembrane segments and an FF sequence, a motif involved in COPII binding; member of DUP240 gene family; PRM9 has a paralog, PRM8, that arose from a segmental duplication pheromone-regulated DUP240 family protein PRM9
YOR376W	-1.36118	0.00168455	0.00610376	2.637	1.662	5.671	5.766	No	YOR376W	hypothetical protein; conserved among S. cerevisiae strains; YOR376W is not an essential gene hypothetical protein
YPR015C	-1.36612	1.8369e-11	2.17863e-10	10.223	9.239	26.003	25.896	Yes	YPR015C	Putative zinc finger transcription factor; binds DNA in sequence-specific manner; overexpression causes a cell cycle delay or arrest hypothetical protein
YJL213W	-1.36986	6.54879e-19	1.44246e-17	17.559	18.543	48.092	48.469	No	YJL213W	hypothetical protein that may interact with ribosomes; periodically expressed during the yeast metabolic cycle; phosphorylated in vitro by the mitotic exit network (MEN) kinase complex, Dbf2p/Mob1p hypothetical protein
YPR027C	-1.37815	2.09632e-13	3.02521e-12	11.542	11.05	30.595	30.293	No	YPR027C	hypothetical protein; SWAT-GFP and seamless-GFP fusion proteins localize to the endoplasmic reticulum, while the mCherry fusion protein localizes to the vacuole hypothetical protein
YPL201C	-1.37938	5.61632e-05	0.000290176	2.861	4.123	9.814	8.795	No	YIG1	Protein that interacts with glycerol 3-phosphatase; plays a role in anaerobic glycerol production; localizes to the nucleus and cytosol Yig1p
YAL044C	-1.38166	5.80685e-41	4.14906e-39	59.708	62.148	159.25	168.886	No	GCV3	H subunit of the mitochondrial glycine decarboxylase complex; glycine decarboxylase is required for the catabolism of glycine to 5,10-methylene-THF; also required for all protein lipoylation; expression is regulated by levels of 5,10-methylene-THF glycine decarboxylase subunit H
YJR149W	-1.38576	2.33571e-08	2.02739e-07	6.762	6.017	16.282	18.331	No	YJR149W	hypothetical protein; green fluorescent protein (GFP)-fusion protein localizes to the cytoplasm putative nitronate monooxygenase
YHL022C	-1.38613	7.88345e-05	0.000391765	3.04	3.259	7.454	9.596	No	SPO11	Meiosis-specific protein that initiates meiotic recombination; initiates meiotic recombination by catalyzing the formation of double-strand breaks in DNA via a transesterification reaction; required for homologous chromosome pairing and synaptonemal complex formation Spo11p
YJR073C	-1.38767	1.83597e-70	5.12236e-68	387.715	382.08	1077.29	1005.61	No	OPI3	Methylene-fatty-acyl-phospholipid synthase; catalyzes the last two steps in phosphatidylcholine biosynthesis; also known as phospholipid methyltransferase bifunctional phosphatidyl-N-methylethanolamine N-methyltransferase/phosphatidyl-N-dimethylethanolamine N-methyltransferase
YCL021W-A	-1.39089	1.43523e-19	3.42135e-18	19.541	22.703	54.9	59.373	No	YCL021W-A	hypothetical protein; SWAT-GFP and mCherry fusion proteins localize to the vacuole hypothetical protein
YPL200W	-1.39201	0.0154009	0.0410528	1.04	1.235	2.462	3.589	No	CSM4	Protein required for accurate chromosome segregation during meiosis; involved in meiotic telomere clustering (bouquet formation) and telomere-led rapid prophase movements; functions with meiosis-specific telomere-binding protein Ndj1p; CSM4 has a paralog, MPS2, that arose from the whole genome duplication Csm4p
YLR237W	-1.39939	2.66985e-21	7.14277e-20	20.088	19.778	55.46	53.392	No	THI7	Plasma membrane transporter responsible for the uptake of thiamine; contributes to uptake of 5-aminoimidazole-4-carboxamide-1-beta-D-ribofuranoside (acadesine); member of the major facilitator superfamily of transporters; mutation of human ortholog causes thiamine-responsive megaloblastic anemia thiamine transporter THI7
YBR006W	-1.40552	9.80237e-28	3.82881e-26	30.32	28.376	80.105	81.001	No	UGA2	Succinate semialdehyde dehydrogenase; involved in the utilization of gamma-aminobutyrate (GABA) as a nitrogen source; part of the 4-aminobutyrate and glutamate degradation pathways; localized to the cytoplasm succinate-semialdehyde dehydrogenase (NAD(P)(+))
YLR089C	-1.41011	1.77759e-33	9.13588e-32	36.32	36.771	101.022	99.719	No	ALT1	Alanine transaminase (glutamic pyruvic transaminase); involved in alanine biosynthesis and catabolism; TOR1-independent role in determining chronological lifespan; expression is induced in the presence of alanine; repression is mediated by Nrg1p; ALT1 has a paralog, ALT2, that arose from the whole genome duplication; Alt2p is catalytically inactive alanine transaminase ALT1
YAL062W	-1.41231	1.67201e-43	1.3606e-41	68.9	77.181	200.618	201.004	No	GDH3	NADP(+)-dependent glutamate dehydrogenase; synthesizes glutamate from ammonia and alpha-ketoglutarate; rate of alpha-ketoglutarate utilization differs from Gdh1p; expression regulated by nitrogen and carbon sources; GDH3 has a paralog, GDH1, that arose from the whole genome duplication glutamate dehydrogenase (NADP(+)) GDH3
YDR010C	-1.4198	5.63079e-10	5.82876e-09	7.004	7.196	19.449	19.76	No	YDR010C	hypothetical protein; conserved across S. cerevisiae strains hypothetical protein
YDR374C	-1.43113	3.43112e-07	2.55437e-06	4.322	5.274	13.277	13.279	No	PHO92	Posttranscriptional regulator of phosphate metabolism; facilitates PHO4 mRNA degradation by interacting with Pop2p; regulates PHO4 mRNA stability by binding to PHO4's 3'UTR in a phosphate-dependent manner; contains highly conserved YTH (YT521-B Homology) domain that exhibits RNA-binding activity; human homolog YTHDF2 can complement yeast null mutant mRNA-binding phosphate metabolism regulator
IRT1	-1.43796	5.53876e-11	6.2769e-10	7.667	7.8	21.512	21.808	No	IRT1	- -
YAR050W	-1.44652	3.86516e-05	0.000206248	2.977	2.739	7.827	8.262	No	FLO1	Lectin-like protein involved in flocculation; cell wall protein that binds mannose chains on the surface of other cells, confers floc-forming ability that is chymotrypsin sensitive and heat resistant; important for co-flocculation with other yeasts, mediating interaction with specific species; FLO1 has a paralog, FLO5, that arose from a segmental duplication flocculin FLO1
YDL227C	-1.44919	3.17586e-09	3.02067e-08	6.717	6.296	16.97	19.708	No	HO	Site-specific endonuclease; required for gene conversion at the MAT locus (homothallic switching) through the generation of a ds DNA break; expression restricted to mother cells in late G1 as controlled by Swi4p-Swi6p, Swi5p, and Ash1p Hop
YIR013C	-1.45265	6.09894e-05	0.00031154	2.681	5.079	10.102	11.739	Yes	GAT4	Protein containing GATA family zinc finger motifs; involved in spore wall assembly; sequence similarity to GAT3, and the double mutant gat3 gat4 exhibits reduced dityrosine fluorescence relative to the single mutants Gat4p
YAL067W-A	-1.47236	0.00138605	0.00514956	3.246	3.055	5.051	12.892	No	YAL067W-A	hypothetical protein; identified by gene-trapping, microarray-based expression analysis, and genome-wide homology searching hypothetical protein
YDL243C	-1.47819	4.62329e-19	1.02996e-17	16.393	18.655	53.669	47.024	No	AAD4	Putative aryl-alcohol dehydrogenase; involved in oxidative stress response; similar to P. chrysosporium aryl-alcohol dehydrogenase; expression induced in cells treated with the mycotoxin patulin; members of the AAD gene family comprise three pairs (AAD3 + AAD15, AAD6/AAD16 + AAD4, AAD10 + AAD14) whose two genes are more related to one another than to other members of the family putative aryl-alco…
YLR035C-A	-1.4914	1.6188e-16	2.92137e-15	11.739	13.427	35.553	37.48	No	YLR035C-A	Retrotransposon TYA Gag and TYB Pol genes; polyprotein is processed to make a nucleocapsid-like protein (Gag), reverse transcriptase (RT), protease (PR), and integrase (IN); YLR035C-A is part of a mutant retrotransposon gag-pol fusion protein
YPL187W	-1.49368	0.000273713	0.00121328	2.565	3.361	11.036	6.033	No	MF(ALPHA)1	Mating pheromone alpha-factor, made by alpha cells; interacts with mating type a cells to induce cell cycle arrest and other responses leading to mating; also encoded by MF(ALPHA)2, although MF(ALPHA)1 produces most alpha-factor; binds copper(II) ions Mf(alpha)1p
YHR137W	-1.50728	2.70328e-17	5.24454e-16	12.716	14.337	37.37	41.929	No	ARO9	Aromatic aminotransferase II; catalyzes the first step of tryptophan, phenylalanine, and tyrosine catabolism aromatic-amino-acid:2-oxoglutarate transaminase
YGR292W	-1.51216	5.14027e-05	0.000267468	2.457	2.424	7.173	7.083	No	MAL12	Maltase (alpha-D-glucosidase); inducible protein involved in maltose catabolism; encoded in the MAL1 complex locus; hydrolyzes the disaccharides maltose, turanose, maltotriose, and sucrose alpha-glucosidase MAL12
YDR019C	-1.51986	6.68058e-15	1.06944e-13	10.663	12.675	32.005	36.903	No	GCV1	T subunit of the mitochondrial glycine decarboxylase complex; glycine decarboxylase is required for the catabolism of glycine to 5,10-methylene-THF; expression is regulated by levels of levels of 5,10-methylene-THF in the cytoplasm glycine decarboxylase subunit T
YGR109C	-1.52516	4.96163e-06	3.10248e-05	2.834	4.086	10.391	10.043	No	CLB6	B-type cyclin involved in DNA replication during S phase; activates Cdc28p to promote initiation of DNA synthesis; functions in formation of mitotic spindles along with Clb3p and Clb4p; most abundant during late G1; CLB6 has a paralog, CLB5, that arose from the whole genome duplication B-type cyclin CLB6
YIL169C	-1.52692	7.77304e-15	1.23421e-13	11.308	9.898	30.001	33.417	No	CSS1	hypothetical protein, secreted when constitutively expressed; SWAT-GFP, seamless-GFP and mCherry fusion proteins localize to the cell periphery, SWAT-GFP fusion also localizes to the extracellular region, and mCherry fusion also localizes to the vacuole; S/T rich and highly similar to YOL155C, a putative glucan alpha-1,4-glucosidase; transcript is induced in both high and low pH environments; non…
YOL162W	-1.54414	0.000123621	0.00059126	1.964	2.219	6.791	5.947	No	YOL162W	hypothetical protein; member of the Dal5p subfamily of the major facilitator family hypothetical protein
YIL011W	-1.55913	2.42863e-14	3.68636e-13	10.026	8.868	27.293	30.62	No	TIR3	Cell wall mannoprotein; member of Srp1p/Tip1p family of serine-alanine-rich proteins; expressed under anaerobic conditions and required for anaerobic growth; TIR3 has a paralog, TIR2, that arose from the whole genome duplication Tir3p
YEL039C	-1.5625	4.85163e-18	1.00091e-16	19.684	25.767	76.955	61.387	No	CYC7	Cytochrome c isoform 2, expressed under hypoxic conditions; also known as iso-2-cytochrome c; electron carrier of the mitochondrial intermembrane space that transfers electrons from ubiquinone-cytochrome c oxidoreductase to cytochrome c oxidase during cellular respiration; protein abundance increases in response to DNA replication stress; CYC7 has a paralog, CYC1, that arose from the whole genome…
YLR461W	-1.57405	0.00536083	0.016645	0.995	1.031	3.234	2.986	No	PAU4	Member of the seripauperin multigene family; encoded mainly in subtelomeric regions; SWAT-GFP fusion protein localizes to the endoplasmic reticulum and vacuole, while mCherry fusion localizes to just the vacuole; active during alcoholic fermentation; regulated by anaerobiosis; negatively regulated by oxygen; repressed by heme seripauperin PAU4
YBR284W	-1.57968	1.36054e-11	1.64021e-10	6.609	6.231	20.247	19.467	No	YBR284W	Putative metallo-dependent hydrolase superfamily protein; similar to AMP deaminases but lacks key catalytic residues and does not rescue purine nucleotide metabolic defect of quadruple aah1 ade8 amd1 his1 mutant; null mutant exhibits longer telomeres, altered Ty mobility, decreased resistance to rapamycin and wortmannin; induced in response to hydrostatic pressure; not an essential gene; YBR284W …
YAR009C	-1.58528	9.6571e-28	3.79738e-26	41.987	35.108	109.045	130.847	No	YAR009C	Retrotransposon TYA Gag and TYB Pol genes; Gag processing produces capsid proteins, Pol is cleaved to produce protease, reverse transcriptase and integrase activities; in YARCTy1-1 TYB is mutant and probably non-functional; protein product forms cytoplasmic foci upon DNA replication stress truncated gag-pol fusion protein
YGL039W	-1.58813	1.53999e-26	5.60421e-25	18.716	17.745	56.428	57.015	No	YGL039W	Aldehyde reductase; reduces aliphatic aldehyde substrates using NADH as cofactor; shown to reduce carbonyl compounds to chiral alcohols carbonyl reductase (NADPH-dependent)
YEL065W	-1.61147	2.951e-19	6.75386e-18	11.434	11.653	37.641	35.371	No	SIT1	Ferrioxamine B transporter; member of the ARN family of transporters that specifically recognize siderophore-iron chelates; transcription is induced during iron deprivation and diauxic shift; potentially phosphorylated by Cdc28p siderophore transporter
YGR035C	-1.62517	1.69113e-18	3.57702e-17	10.456	11.551	36.19	33.874	No	YGR035C	hypothetical protein, potential Cdc28p substrate; transcription is activated by paralogous transcription factors Yrm1p and Yrr1p along with genes involved in multidrug resistance; YGR035C has a paralog, YLR346C, that arose from the whole genome duplication hypothetical protein
YHR213W-A	-1.63868	0.000339856	0.00146845	3.856	1.356	7.887	9.2	No	YHR213W-A	hypothetical protein; identified by gene-trapping, microarray-based expression analysis, and genome-wide homology searching hypothetical protein
YOR214C	-1.65115	0.0126381	0.0347636	0.547	1.189	2.233	3.219	No	SPR2	Putative spore wall protein; expression increases during sporulation; not an essential gene; YOR214C has a paralog, SPO19, that arose from the whole genome duplication Spr2p
snR70	-1.65343	0.00869866	0.0254318	24.975	54.432	98.136	159.936	No	snR70	- -
YOR298W	-1.67036	2.1919e-09	2.11222e-08	3.955	5.014	14.848	14.527	No	MUM3	hypothetical protein involved in outer spore wall organization; has similarity to the tafazzins superfamily of acyltransferases Mum3p
YFL053W	-1.67328	1.19732e-10	1.31615e-09	4.654	5.265	16.231	16.42	No	DAK2	Dihydroxyacetone kinase; required for detoxification of dihydroxyacetone (DHA); involved in stress adaptation dihydroxyacetone kinase
YJR159W	-1.67998	2.6197e-12	3.38826e-11	5.605	6.611	20.918	19.364	No	SOR1	Sorbitol dehydrogenase; protein sequence is 99% identical to the Sor2p sorbitol dehydrogenase; expression is induced in the presence of sorbitol or xylose L-iditol 2-dehydrogenase SOR1
YLR227W-B	-1.68454	5.41881e-26	1.88981e-24	20.572	18.562	59.62	70.837	No	YLR227W-B	Retrotransposon TYA Gag and TYB Pol genes; transcribed/translated as one unit; polyprotein is processed to make a nucleocapsid-like protein (Gag), reverse transcriptase (RT), protease (PR), and integrase (IN); similar to retroviral genes gag-pol fusion protein
YIL162W	-1.69382	3.17975e-36	1.92063e-34	21.998	22.034	73.712	73.737	No	SUC2	Invertase; sucrose hydrolyzing enzyme; a secreted, glycosylated form is regulated by glucose repression, and an intracellular, nonglycosylated enzyme is produced constitutively beta-fructofuranosidase SUC2
YJR047C	-1.69525	3.57675e-53	4.98956e-51	51.995	46.548	163.503	167.191	No	ANB1	Translation elongation factor eIF-5A; previously thought to function in translation initiation; undergoes an essential hypusination modification; expressed under anaerobic conditions; ANB1 has a paralog, HYP2, that arose from the whole genome duplication; human EIF5A complements the inviability of the yeast hyp2 anb1 double null mutant translation elongation factor eIF-5A
YIR028W	-1.70826	1.43602e-13	2.1034e-12	6.089	7.716	23.889	22.643	No	DAL4	Allantoin permease; expression sensitive to nitrogen catabolite repression and induced by allophanate, an intermediate in allantoin degradation allantoin permease
YOR009W	-1.73724	2.26684e-19	5.33391e-18	8.932	10.047	32.081	33.09	No	TIR4	Cell wall mannoprotein; expressed under anaerobic conditions and required for anaerobic growth; transcription is also induced by cold shock; member of the Srp1p/Tip1p family of serine-alanine-rich proteins Tir4p
YHR216W	-1.74134	7.36687e-05	0.000369226	1.542	1.644	5.272	5.671	No	IMD2	Inosine monophosphate dehydrogenase; catalyzes the rate-limiting step in GTP biosynthesis, expression is induced by mycophenolic acid resulting in resistance to the drug, expression is repressed by nutrient limitation; IMD2 has a paralog, YAR073W/YAR075W, that arose from a segmental duplication IMP dehydrogenase IMD2
YHR183W	-1.7463	1.98662e-69	5.06071e-67	98.305	87.776	315.444	330.801	No	GND1	6-phosphogluconate dehydrogenase (decarboxylating); catalyzes an NADPH regenerating reaction in the pentose phosphate pathway; required for growth on D-glucono-delta-lactone and adaptation to oxidative stress; GND1 has a paralog, GND2, that arose from the whole genome duplication phosphogluconate dehydrogenase (decarboxylating) GND1
YPL021W	-1.75309	6.50198e-10	6.69509e-09	3.856	4.113	14.253	13.322	No	ECM23	Non-essential protein of unconfirmed function; affects pre-rRNA processing, may act as a negative regulator of the transcription of genes involved in pseudohyphal growth; homologous to Srd1p Ecm23p
YEL014C	-1.77178	2.7137e-06	1.79453e-05	2.287	2.117	7.19	8.219	No	YEL014C	hypothetical protein; conserved among S. cerevisiae strains hypothetical protein
YGR087C	-1.77334	6.27928e-30	2.78714e-28	17.236	20.437	69.833	62.824	No	PDC6	Minor isoform of pyruvate decarboxylase; decarboxylates pyruvate to acetaldehyde, involved in amino acid catabolism; transcription is glucose- and ethanol-dependent, and is strongly induced during sulfur limitation indolepyruvate decarboxylase 6
YIL012W	-1.79242	1.74621e-06	1.19116e-05	2.852	1.978	9.788	7.892	No	YIL012W	hypothetical protein; conserved across S. cerevisiae strains hypothetical protein
YJL153C	-1.81143	2.01842e-74	6.56997e-72	55.762	59.492	211.688	206.228	No	INO1	Inositol-3-phosphate synthase; involved in synthesis of inositol phosphates and inositol-containing phospholipids; transcription is coregulated with other phospholipid biosynthetic genes by Ino2p and Ino4p, which bind the UASINO DNA element inositol-3-phosphate synthase INO1
YBR018C	-1.8244	3.13173e-09	2.98355e-08	3.013	4.401	13.557	13.357	No	GAL7	Galactose-1-phosphate uridyl transferase; synthesizes glucose-1-phosphate and UDP-galactose from UDP-D-glucose and alpha-D-galactose-1-phosphate in the second step of galactose catabolism; human homolog UGP2 can complement yeast null mutant UDP-glucose:hexose-1-phosphate uridylyltransferase
YJL217W	-1.82466	4.88459e-58	7.94968e-56	34.347	34.616	123.875	128.575	No	REE1	Cytoplasmic protein involved in the regulation of enolase (ENO1); mRNA expression is induced by calcium shortage, copper deficiency (via Mac1p) and the presence of galactose (via Gal4p); mRNA expression is also regulated by the cell cycle Ree1p
YOR235W	-1.83163	0.00595401	0.018169	1.408	0.492	2.496	4.639	No	IRC13	hypothetical protein; conserved across S. cerevisiae strains; null mutant displays increased levels of spontaneous Rad52 foci Irc13p
YGL258W-A	-1.83222	2.52666e-05	0.00014042	2.897	1.356	9.016	6.902	No	YGL258W-A	hypothetical protein
YOL158C	-1.84682	1.32205e-25	4.50344e-24	11.658	11.245	40.434	44.795	No	ENB1	Endosomal ferric enterobactin transporter; expressed under conditions of iron deprivation; member of the major facilitator superfamily; expression is regulated by Rcs1p and affected by chloroquine treatment Enb1p
YHL005C	-1.84682	0.00132072	0.00491931	1.255	1.161	2.725	6.308	No	YHL005C	hypothetical protein; conserved among S. cerevisiae strains; YHL005C is not an essential gene hypothetical protein
YOR382W	-1.87522	4.08037e-62	8.24376e-60	252.669	314.602	1129.9	1019.92	No	FIT2	Mannoprotein that is incorporated into the cell wall; incorporated via a glycosylphosphatidylinositol (GPI) anchor; involved in the retention of siderophore-iron in the cell wall Fit2p
YDL210W	-1.93196	5.56631e-19	1.23534e-17	7.049	6.268	26.359	26.378	No	UGA4	GABA (gamma-aminobutyrate) permease; serves as a GABA transport protein involved in the utilization of GABA as a nitrogen source; catalyzes the transport of putrescine and delta-aminolevulinic acid (ALA); localized to the vacuolar membrane Uga4p
YDR402C	-2.00683	1.62625e-12	2.15084e-11	3.363	3.983	15.612	14.605	No	DIT2	N-formyltyrosine oxidase; sporulation-specific microsomal enzyme involved in the production of N,N-bisformyl dityrosine required for spore wall maturation, homologous to cytochrome P-450s; SWAT-GFP and mCherry fusion proteins localize to the endoplasmic reticulum and vacuole respectively putative cytochrome P450
YIR041W	-2.05601	5.61128e-05	0.000290172	0.924	1.281	5.204	4.174	No	PAU15	hypothetical protein; member of the seripauperin multigene family encoded mainly in subtelomeric regions; SWAT-GFP and mCherry fusion proteins localize to the vacuole seripauperin PAU15
YNR071C	-2.07409	2.27422e-11	2.67564e-10	2.843	3.185	14.287	12.014	No	YNR071C	Putative aldose 1-epimerase aldose 1-epimerase superfamily protein
YAL018C	-2.07911	0.00134438	0.00500428	0.619	0.706	3.226	2.427	No	LDS1	Protein Involved in spore wall assembly; localizes to lipid droplets found on or outside of the prospore membrane; shares similarity with Lds2p and Rrt8p, and a strain mutant for all 3 genes exhibits reduced dityrosine fluorescence relative to the single mutants Lds1p
YHL044W	-2.08222	1.45115e-08	1.29018e-07	1.812	3.157	10.187	11.248	No	YHL044W	Putative integral membrane protein; member of DUP240 gene family; green fluorescent protein (GFP)-fusion protein localizes to the plasma membrane in a punctate pattern DUP240 family protein
YNR073C	-2.08784	0.000231918	0.00104765	1.238	0.613	3.582	4.759	No	MAN2	Mannitol dehydrogenase; MAN2 has a paralog, DSF1, that arose from a segmental duplication putative mannitol dehydrogenase
YGR234W	-2.09426	8.46533e-83	3.0999e-80	39.907	44.18	189.472	181.158	No	YHB1	Nitric oxide oxidoreductase; flavohemoglobin that plays role in oxidative and nitrosative stress responses; protects against nitration of cellular targets and against cell growth inhibition under aerobic or anaerobic conditions; yeast flavohemoglobin Yhb1p and human homolog neuroglobin NGB protect cells against alpha-synuclein cytotoxicity and aggregate formation; protein increases in abundance, …
YLR134W	-2.09707	3.49181e-35	1.93005e-33	13.254	12.043	60.104	52.273	No	PDC5	Minor isoform of pyruvate decarboxylase; key enzyme in alcoholic fermentation, decarboxylates pyruvate to acetaldehyde, regulation is glucose- and ethanol-dependent, repressed by thiamine, involved in amino acid catabolism indolepyruvate decarboxylase 5
YEL070W	-2.1561	3.17796e-10	3.3549e-09	2.269	2.368	11.707	9.82	No	DSF1	Mannitol dehydrogenase; deletion suppresses mutation of mpt5; DSF1 has a paralog, MAN2, that arose from a segmental duplication mannitol dehydrogenase DSF1
YGL033W	-2.1574	1.37131e-08	1.22105e-07	2.072	1.616	8.863	8.382	No	HOP2	Meiosis-specific protein that localizes to chromosomes; prevents synapsis between nonhomologous chromosomes and ensures synapsis between homologs; complexes with Mnd1p to promote homolog pairing and meiotic double-strand break repair; heterodimer of Hop2p-Mnd1p stimulates the Dmc1p-mediated strand invasion Hop2p
YFL020C	-2.16957	1.06001e-55	1.55265e-53	20.357	17.949	89.035	89.641	No	PAU5	Member of the seripauperin multigene family; encoded mainly in subtelomeric regions; induced during alcoholic fermentation; induced by low temperature and also by anaerobic conditions; negatively regulated by oxygen and repressed by heme seripauperin PAU5
YLR012C	-2.17326	0.00220228	0.00772181	0.807	1.681	9.508	1.928	No	YLR012C	hypothetical protein; YLR012C is not an essential gene hypothetical protein
YNL143C	-2.18568	0.00563501	0.0173492	0.834	0.288	1.486	4.036	No	YNL143C	hypothetical protein; expressed at both mRNA and protein levels hypothetical protein
YCR102C	-2.20296	2.51653e-11	2.94298e-10	2.332	2.489	10.917	11.885	No	YCR102C	hypothetical protein; involved in copper metabolism; similar to C. carbonum toxD gene; member of the quinone oxidoreductase family hypothetical protein
YCL064C	-2.21497	7.14706e-138	1.04687e-134	78.576	76.94	365.769	381.155	No	CHA1	Catabolic L-serine (L-threonine) deaminase; catalyzes the degradation of both L-serine and L-threonine; required to use serine or threonine as the sole nitrogen source, transcriptionally induced by serine and threonine L-serine/L-threonine ammonia-lyase CHA1
YLR013W	-2.23433	0.00155825	0.00568833	0.538	0.492	2.114	2.797	Yes	GAT3	Protein containing GATA family zinc finger motifs; involved in spore wall assembly; sequence similarity to GAT4, and the double mutant gat3 gat4 exhibits reduced dityrosine fluorescence relative to the single mutants Gat3p
YCR104W	-2.24922	0.00587933	0.017968	0.466	0.325	2.462	1.394	No	PAU3	Member of the seripauperin multigene family; encoded mainly in subtelomeric region; active during alcoholic fermentation; regulated by anaerobiosis; negatively regulated by oxygen; repressed by heme seripauperin PAU3
YOL014W	-2.30845	4.82729e-44	4.04044e-42	18.034	14.755	91.981	76.543	No	YOL014W	hypothetical protein; mCherry fusion protein localizes to the cytosol and nucleus hypothetical protein
YHR130C	-2.4499	0.000103156	0.000500322	0.897	0.418	3.166	4.294	No	YHR130C	hypothetical protein; conserved among S. cerevisiae strains; YHR130C is not an essential gene hypothetical protein
YDR182W-A	-2.48289	0.00345089	0.0114101	1.919	5.469	28.872	13.675	No	YDR182W-A	hypothetical protein; identified by fungal homology and RT-PCR hypothetical protein
YHL046C	-2.49392	0.00417376	0.0133775	0.251	1.031	5.883	1.196	No	PAU13	hypothetical protein; member of the seripauperin multigene family encoded mainly in subtelomeric regions; expression is induced after ethanol shock; SWAT-GFP and mCherry fusion proteins localize to the endoplasmic reticulum and vacuole respectively seripauperin PAU13
YJL218W	-2.51493	2.03951e-10	2.18455e-09	1.435	1.839	8.15	11.162	No	YJL218W	Putative acetyltransferase; similar to bacterial galactoside O-acetyltransferases; induced by oleate in an OAF1/PIP2-dependent manner; promoter contains an oleate response element consensus sequence; non-essential gene acetyltransferase
YJR150C	-2.58582	6.09531e-13	8.50296e-12	1.489	2.294	11.223	12.143	No	DAN1	Cell wall mannoprotein; has similarity to Tir1p, Tir2p, Tir3p, and Tir4p; expressed under anaerobic conditions, completely repressed during aerobic growth Dan1p
YBL044W	-2.59892	0.00354885	0.0116486	0.242	0.334	1.986	1.437	No	YBL044W	hypothetical protein; YBL044W is not an essential protein hypothetical protein
YGL034C	-2.61035	0.0165172	0.0435332	0.484	0	2.02	1.17	No	YGL034C	hypothetical protein; conserved among S. cerevisiae strains; YGL034C is not an essential gene hypothetical protein
YGL138C	-2.64641	0.000167126	0.00077529	0.475	0.39	2.428	3.227	No	YGL138C	hypothetical protein; has no significant sequence similarity to any known protein hypothetical protein
YJR005C-A	-2.70334	1.07399e-29	4.66111e-28	5.336	8.125	50.859	38.917	No	LSO1	Protein with a potential role in response to iron deprivation; transcription increases during iron deprivation and during treatment with 2-(6-benzyl-2-pyridyl)quinazoline (BPQ) and copper; regulated by Aft1p and, to a lesser extent, by Aft2p; originally identified as a syntenic homolog of an Ashbya gossypii gene; localizes to nucleus and cytoplasm, and nuclear localization is enhanced under iron-…
YER011W	-2.74843	5.59738e-47	5.75351e-45	6.376	6.351	43.083	45.578	No	TIR1	Cell wall mannoprotein; expression is downregulated at acidic pH and induced by cold shock and anaerobiosis; abundance is increased in cells cultured without shaking; member of the Srp1p/Tip1p family of serine-alanine-rich proteins GPI-anchored mannoprotein
YLR342W-A	-3.02568	0.000398632	0.00169737	6.358	9.183	100.895	29.811	No	YLR342W-A	hypothetical protein
YBR085W	-3.04596	5.32231e-32	2.55602e-30	2.924	5.023	31.945	35.001	No	AAC3	Mitochondrial inner membrane ADP/ATP translocator; exchanges cytosolic ADP for mitochondrially synthesized ATP; expressed under anaerobic conditions; similar to Aac1p; has roles in maintenance of viability and in respiration; AAC3 has a paralog, PET9, that arose from the whole genome duplication ADP/ATP carrier protein AAC3
YDL241W	-3.19368	1.89398e-51	2.36103e-49	6.116	5.553	47.913	62.867	No	YDL241W	hypothetical protein; SWAT-GFP and mCherry fusion proteins localize to the endoplasmic reticulum; YDL241W is not an essential gene hypothetical protein
YHR214C-E	-3.93899	2.28158e-06	1.52253e-05	0.404	0	3.803	3.382	No	YHR214C-E	hypothetical protein; identified by gene-trapping, microarray-based expression analysis, and genome-wide homology searching hypothetical protein
YBR301W	-5.0691	0.00270499	0.00928988	0.493	0	8.634	8.468	No	PAU24	Cell wall mannoprotein; has similarity to Tir1p, Tir2p, Tir3p, and Tir4p; member of the seripauperin multigene family encoded mainly in subtelomeric regions; expressed under anaerobic conditions, completely repressed during aerobic growth seripauperin PAU24
YOL161C	-6.10457	0.000952662	0.00368425	0	0	0.883	0.895	No	PAU20	hypothetical protein; member of the seripauperin multigene family encoded mainly in subtelomeric regions; SWAT-GFP and mCherry fusion proteins localize to the vacuole; expression induced by low temperature and also by anaerobic conditions; induced during alcoholic fermentation seripauperin PAU20
YGR294W	-6.21156	3.90616e-15	6.39279e-14	1.238	0.344	58.389	64.15	No	PAU12	hypothetical protein; member of the seripauperin multigene family encoded mainly in subtelomeric regions; SWAT-GFP fusion protein localizes to both the endoplasmic reticulum and vacuole seripauperin PAU12
YHR212W-A	-7.4265	4.19068e-06	2.66015e-05	0	0	2.224	2.281	No	YHR212W-A	Pseudogenic fragment with similarity to flocculins; identified by gene-trapping, microarray-based expression analysis, and genome-wide homology searching; SWAT-GFP, seamless-GFP and mCherry fusion proteins localize to the endoplasmic reticulum; YHR212W-A has a paralog, YAR061W, that arose from a segmental duplication hypothetical protein
YPL038W-A	-7.99547	2.96674e-07	2.22278e-06	0	0	3.251	3.339	No	YPL038W-A	hypothetical protein; identified by fungal homology and RT-PCR hypothetical protein
YOR032W-A	-9.56655	1.62492e-10	1.75978e-09	0	0	12.114	7.47	No	YOR032W-A	hypothetical protein; SWAT-GFP and seamless-GFP fusion proteins localize to the endoplasmic reticulum; identified by gene-trapping, microarray-based expression analysis, and genome-wide homology searching hypothetical protein
YPR133W-A	-14.8063	1.2841e-24	4.02328e-23	0	0	363.553	377.971	No	TOM5	Component of the TOM (translocase of outer membrane) complex; responsible for recognition and initial import of all mitochondrially directed proteins; involved in transfer of precursors from the Tom70p and Tom20p receptors to the Tom40p pore Tom5p

## Sheet: P169A  vs. WT
Gene ID	log2(Fold_change)	p-value	FDR p-value correction	mRNA expression level at thermal stress				YEASTRACT 2019 TF	Gene	Gene Function
				Spt15 mutant strain P169A		Wild type strain BY4741
				Duplicate#1	Duplicate#2	Duplicate#1	Duplicate#2
ETS1-1	12.3386	2.49534e-17	1.1189e-15	60.099	81.651	0	0	No	ETS1-1	- -
ETS1-2	12.3386	2.49534e-17	1.1189e-15	60.099	81.651	0	0	No	ETS1-2	- -
YLR154W-C	11.9049	3.42779e-14	1.03256e-12	37.42	67.665	0	0	No	TAR1	Protein potentially involved in regulation of respiratory metabolism; located in the mitochondria; interacts genetically with RPO41 and physically with Coq5p; encoded within the 25S rRNA gene on the opposite strand Tar1p
ITS2-1	10.9534	2.54909e-05	0.000172504	7.46	47.026	0	0	No	ITS2-1	- -
ITS2-2	10.9534	2.54909e-05	0.000172504	7.46	47.026	0	0	No	ITS2-2	- -
ITS1-1	10.5242	1.06457e-07	1.23583e-06	30.39	9.775	0	0	No	ITS1-1	- -
ITS1-2	10.5242	1.06457e-07	1.23583e-06	30.39	9.775	0	0	No	ITS1-2	- -
YBL112C	9.98811	1.75649e-11	3.65874e-10	16.963	10.841	0	0	No	YBL112C	hypothetical protein; YBL112C is contained within TEL02L hypothetical protein
YOL164W-A	8.45012	3.0248e-08	3.88796e-07	5.303	4.248	0	0	No	YOL164W-A	hypothetical protein; identified by fungal homology and RT-PCR hypothetical protein
YPR108W-A	7.99848	2.55542e-07	2.75423e-06	3.9	3.114	0	0	No	YPR108W-A	hypothetical protein; identified by fungal homology and RT-PCR hypothetical protein
YGR025W	7.35224	1.30592e-05	9.57935e-05	0.997	3.51	0	0	No	YGR025W	hypothetical protein; conserved across S. cerevisiae strains hypothetical protein
YBL008W-A	7.17246	1.05923e-05	7.99736e-05	2.222	1.766	0	0	No	YBL008W-A	hypothetical protein; identified by fungal homology and RT-PCR hypothetical protein
YHR218W	3.84052	1.65209e-06	1.52825e-05	5.773	2.84	0.102	0.551	No	YHR218W	Helicase-like protein encoded within the telomeric Y' element hypothetical protein
YMR321C	3.00532	4.93571e-14	1.44241e-12	12.406	10.323	1.783	1.059	No	YMR321C	hypothetical protein; proposed to be a palmitoylated membrane protein; YMR321C has a paralog, SAM4, that arose from a single-locus duplication hypothetical protein
YIR042C	3.00154	1.171e-08	1.64951e-07	6.138	5.223	0.654	0.757	No	YIR042C	hypothetical protein; YIR042C is a non-essential gene hypothetical protein
YBL113C	2.84467	6.06735e-46	1.61998e-43	45.593	48.435	6.74	6.282	No	YBL113C	Helicase-like protein encoded within the telomeric Y' element hypothetical protein
YMR322C	2.80274	1.11584e-09	1.81563e-08	7.768	15.592	1.248	2.074	No	SNO4	Possible chaperone and cysteine protease; required for transcriptional reprogramming during the diauxic shift and for survival in stationary phase; similar to bacterial Hsp31 and yeast Hsp31p, Hsp32p, and Hsp33p; DJ-1/ThiJ/PfpI superfamily member; predicted involvement in pyridoxine metabolism; induced by mild heat stress and copper deprivation glutathione-independent methylglyoxalase family prot…
YFL066C	2.72453	0.00367464	0.012542	0.892	4.043	0.212	0.559	No	YFL066C	Helicase-like protein encoded within the telomeric Y' element; induced by treatment with 8-methoxypsoralen and UVA irradiation; SWAT-GFP and mCherry fusion proteins localize to the nucleus Y' element ATP-dependent helicase
YNR074C	2.67407	1.39665e-20	8.82144e-19	27.017	29.577	3.183	5.723	No	AIF1	Mitochondrial cell death effector; translocates to the nucleus in response to apoptotic stimuli, homolog of mammalian Apoptosis-Inducing Factor, putative reductase Aif1p
YHL049C	2.65436	9.98598e-06	7.57831e-05	3.503	9.174	0.764	1.3	No	YHL049C	hypothetical protein
YNR075W	2.60519	6.31672e-14	1.80997e-12	11.173	12.782	1.944	1.988	No	COS10	Endosomal protein involved in turnover of plasma membrane proteins; member of the DUP380 subfamily of conserved, often subtelomeric COS genes; required for the multivesicular vesicle body sorting pathway that internalizes plasma membrane proteins for degradation; Cos proteins provide ubiquitin in trans for nonubiquitinated cargo proteins Cos10p
YLL063C	2.56885	1.12715e-13	3.12306e-12	11.23	13.856	2.275	1.971	No	AYT1	Acetyltransferase; catalyzes trichothecene 3-O-acetylation, suggesting a possible role in trichothecene biosynthesis acetyltransferase
YHL050C	2.53163	6.69637e-21	4.27549e-19	19.906	23.486	3.939	3.503	No	YHL050C	hypothetical protein; potential Cdc28p substrate hypothetical protein
YAR071W	2.50051	1.47948e-06	1.39047e-05	4.662	7.088	0.705	1.36	No	PHO11	One of three repressible acid phosphatases; glycoprotein that is transported to the cell surface by the secretory pathway; induced by phosphate starvation and coordinately regulated by PHO4 and PHO2; PHO11 has a paralog, PHO12, that arose from a segmental duplication acid phosphatase PHO11
YJL225C	2.49177	2.11458e-24	1.82662e-22	32.279	42.078	7.513	5.697	No	YJL225C	Putative Y' element ATP-dependent helicase Y' element ATP-dependent helicase
YFL067W	2.47875	4.67086e-05	0.000296934	3.697	17	1.808	1.876	No	YFL067W	hypothetical protein; down-regulated at low calcium levels; mCherry fusion protein localizes to the vacuole hypothetical protein
YLL066C	2.46537	3.36656e-13	8.90774e-12	23.384	31.549	6.783	3.133	No	YLL066C	Putative Y' element ATP-dependent helicase; YLL066C is not an essential gene Y' element ATP-dependent helicase
YGL260W	2.39735	5.88918e-08	7.16212e-07	11.781	13.551	3.574	1.213	No	YGL260W	hypothetical protein; transcription is significantly increased in a NAP1 deletion background; deletion mutant has increased accumulation of nickel and selenium hypothetical protein
YCR098C	2.3442	9.5957e-06	7.32015e-05	4.784	4.682	1.155	0.68	No	GIT1	Plasma membrane permease; mediates uptake of glycerophosphoinositol and glycerophosphocholine as sources of the nutrients inositol and phosphate; expression and transport rate are regulated by phosphate and inositol availability Git1p
YDR541C	2.33914	1.19757e-11	2.54875e-10	12.933	19.741	3.803	2.659	No	YDR541C	Aldehyde reductase; substrates include both aromatic and aliphatic aldehydes; uses NADPH as cofactor; SWAT-GFP and mCherry fusion proteins localize to the endoplasmic reticulum and vacuole respectively carbonyl reductase (NADPH-dependent)
YML133C	2.31953	7.86782e-30	9.06188e-28	36.398	38.241	7.122	7.806	No	YML133C	Putative Y' element ATP-dependent helicase; the authentic, non-tagged protein is detected in highly purified mitochondria in high-throughput studies; YML133C contains an intron Y' element ATP-dependent helicase
YOR008C-A	2.26223	7.49619e-13	1.88174e-11	28.095	17.678	5.365	4.114	No	YOR008C-A	hypothetical protein; includes a potential transmembrane domain; deletion results in slightly lengthened telomeres; SWAT-GFP and mCherry fusion proteins localize to the endoplasmic reticulum and vacuole respectively hypothetical protein
YKR106W	2.20307	3.04864e-08	3.90147e-07	7.452	7.963	1.604	1.695	No	GEX2	Proton:glutathione antiporter; localized to the vacuolar and plasma membranes; expressed at a very low level; potential role in resistance to oxidative stress and modulation of the PKA pathway; GEX2 has a paralog, GEX1, that arose from a segmental duplication glutathione exchanger
YDL248W	2.1868	1.63276e-12	4.02976e-11	12.998	16.383	3.014	3.468	No	COS7	Endosomal protein involved in turnover of plasma membrane proteins; member of the DUP380 subfamily of conserved, often subtelomeric COS genes; required for the multivesicular vesicle body sorting pathway that internalizes plasma membrane proteins for degradation; Cos proteins provide ubiquitin in trans for nonubiquitinated cargo proteins; the authentic, non-tagged protein is detected in highly pu…
YER188C-A	2.1696	3.28506e-07	3.45815e-06	8.684	6.418	1.902	1.446	No	YER188C-A	hypothetical protein
YJL007C	2.11052	0.000556025	0.00252208	4.46	4.888	0.416	1.687	No	YJL007C	hypothetical protein; conserved among S. cerevisiae strains hypothetical protein
YKL221W	2.05979	1.89211e-11	3.92731e-10	12.535	15.645	3.37	3.399	No	MCH2	Protein with similarity to mammalian monocarboxylate permeases; monocarboxylate permeases are involved in transport of monocarboxylic acids across the plasma membrane but mutant is not deficient in monocarboxylate transport Mch2p
YOL163W	2.04194	2.34486e-20	1.44986e-18	33.122	37.913	9.686	7.513	No	YOL163W	hypothetical protein; member of the Dal5p subfamily of the major facilitator family hypothetical protein
YKR105C	1.99991	4.56603e-25	4.25728e-23	37.606	40.631	9.89	9.561	No	VBA5	Plasma membrane protein of the Major Facilitator Superfamily (MFS); involved in amino acid uptake and drug sensitivity; VBA5 has a paralog, VBA3, that arose from a segmental duplication basic amino acid transporter
YFL061W	1.9744	6.80186e-09	9.91417e-08	9.892	13.772	3.099	2.9	No	DDI2	Cyanamide hydratase that detoxifies cyanamide; member of the HD domain metalloprotein superfamily; expression is induced over 100-fold by cyanamide and by SN2-type DNA alkylating agents such as MMS and DMA; induction decreased in rad6 and rad18 mutants; gene and protein are identical to DDI3 and Ddi3p cyanamide hydratase
YKR073C	1.96492	0.00590213	0.0186996	2.116	3.982	1.188	0.404	No	YKR073C	hypothetical protein; conserved across S. cerevisiae strains hypothetical protein
YGL149W	1.94331	0.00417011	0.0139098	2.895	2.269	0.9	0.456	No	YGL149W	hypothetical protein; conserved among S. cerevisiae strains; YGL149W is not an essential gene hypothetical protein
YBR299W	1.93973	2.86987e-08	3.71313e-07	9.681	9.159	2.377	2.513	No	MAL32	Maltase (alpha-D-glucosidase); inducible protein involved in maltose catabolism; encoded in the MAL3 complex locus; functional in genomic reference strain S288C; hydrolyzes the disaccharides maltose, turanose, maltotriose, and sucrose alpha-glucosidase MAL32
YGR169C-A	1.92874	5.9476e-39	1.24772e-36	301.75	387.759	89.825	90.708	No	LSO2	Protein with a potential role in response to iron deprivation; localizes to nucleus and cytoplasm, and nuclear localization is enhanced under iron-replete conditions; null mutant exhibits slow growth during iron deprivation; LSO2 has a paralog, LSO1, that arose from the whole genome duplication Lso2p
YLL064C	1.92027	5.26801e-12	1.17659e-10	19.338	15.637	4.703	4.484	No	PAU18	hypothetical protein; member of the seripauperin multigene family encoded mainly in subtelomeric regions; identical to Pau6p seripauperin PAU18
YNR076W	1.92027	5.26801e-12	1.17659e-10	19.338	15.637	4.703	4.484	No	PAU6	Member of the seripauperin multigene family; encoded mainly in subtelomeric regions; SWAT-GFP fusion protein localizes to the endoplasmic reticulum and vacuole, while mCherry fusion localizes to just the vacuole; active during alcoholic fermentation; regulated by anaerobiosis; negatively regulated by oxygen; repressed by heme; identical to Pau18p seripauperin PAU6
YOL162W	1.89953	6.74429e-16	2.476e-14	22.833	24.644	6.791	5.947	No	YOL162W	hypothetical protein; member of the Dal5p subfamily of the major facilitator family hypothetical protein
YHL048W	1.89634	4.28847e-18	2.09921e-16	30.917	38.835	8.914	9.811	No	COS8	Endosomal protein involved in turnover of plasma membrane proteins; member of the DUP380 subfamily of conserved, often subtelomeric COS genes; required for the multivesicular vesicle body sorting pathway that internalizes plasma membrane proteins for degradation; Cos proteins provide ubiquitin in trans for nonubiquitinated cargo proteins Cos8p
YEL076C	1.87091	1.60838e-05	0.000114102	6.243	5.504	1.63	1.566	No	YEL076C	hypothetical protein
YCR020W-B	1.81073	1.4045e-38	2.57813e-36	130.981	146.027	37.378	41.395	No	HTL1	Component of the RSC chromatin remodeling complex; RSC functions in transcriptional regulation and elongation, chromosome stability, and establishing sister chromatid cohesion; involved in telomere maintenance Htl1p
YJR161C	1.79599	2.39433e-08	3.16763e-07	10.516	10.94	3.183	2.96	No	COS5	Endosomal protein involved in turnover of plasma membrane proteins; member of the DUP380 subfamily of conserved, often subtelomeric COS genes; required for the multivesicular vesicle body sorting pathway that internalizes plasma membrane proteins for degradation; Cos proteins provide ubiquitin in trans for nonubiquitinated cargo proteins Cos5p
YPL280W	1.7772	1.23943e-08	1.73343e-07	24.909	23.418	9.355	4.751	No	HSP32	Possible chaperone and cysteine protease; required for transcriptional reprogramming during the diauxic shift and for survival in stationary phase; similar to E. coli Hsp31 and S. cerevisiae Hsp31p, Hsp33p, and Sno4p; member of the DJ-1/ThiJ/PfpI superfamily, which includes human DJ-1 involved in Parkinson's disease and cancer glutathione-independent methylglyoxalase family protein
YOR304C-A	1.7756	1.38618e-31	1.85055e-29	209.437	200.111	52.43	66.904	No	BIL1	Protein that binds Bud6p and has a role in actin cable assembly; involved in the Bnr1p-dependent pathway of cable assembly; localizes to bud tip and bud neck Bil1p
YFR055W	1.77404	1.84581e-14	5.70648e-13	22.679	23.159	6.961	6.403	No	IRC7	Beta-lyase involved in the production of thiols; null mutant displays increased levels of spontaneous Rad52p foci; expression induced by nitrogen limitation in a GLN3, GAT1-dependent manner and by copper levels in a Mac1-dependent manner cysteine-S-conjugate beta-lyase IRC7
YNL332W	1.75372	4.42672e-05	0.000283252	5.376	7.94	2.131	1.764	No	THI12	Protein involved in synthesis of the thiamine precursor HMP; member of a subtelomeric gene family including THI5, THI11, THI12, and THI13; hydroxymethylpyrimidine is also known as HMP 4-amino-5-hydroxymethyl-2-methylpyrimidine phosphate synthase
YLR377C	1.74933	6.8342e-32	9.33584e-30	78.618	79.93	24.381	22.6	No	FBP1	Fructose-1,6-bisphosphatase; key regulatory enzyme in the gluconeogenesis pathway, required for glucose metabolism; undergoes either proteasome-mediated or autophagy-mediated degradation depending on growth conditions; glucose starvation results in redistribution to the periplasm; interacts with Vid30p fructose 1,6-bisphosphate 1-phosphatase
YLR331C	1.7213	0.000840018	0.00360165	4.411	8.961	2.708	1.334	No	JIP3	hypothetical protein; conserved among S. cerevisiae strains; not conserved in closely related Saccharomyces species; 98% of ORF overlaps the verified gene MID2 Jip3p
YKL122C	1.71004	1.51484e-40	3.42237e-38	145.495	158.825	46.411	46.309	No	SRP21	Subunit of the signal recognition particle (SRP); SRP functions in protein targeting to the endoplasmic reticulum membrane; not found in mammalian SRP; forms a pre-SRP structure in the nucleolus that is translocated to the cytoplasm signal recognition particle subunit SRP21
YNL335W	1.70416	3.40758e-09	5.2674e-08	15.73	23.471	6.146	5.809	No	DDI3	Cyanamide hydratase that detoxifies cyanamide; member of the HD domain metalloprotein superfamily; expression is induced over 100-fold by cyanamide and by SN2-type DNA alkylating agents such as MMS and DMA; induction decreased in rad6 and rad18 mutants; gene and protein are identical to DDI2 and Ddi2p cyanamide hydratase
YGR295C	1.70224	3.8974e-32	5.4508e-30	126.595	147.992	40.409	43.779	No	COS6	Endosomal protein involved in turnover of plasma membrane proteins; member of the DUP380 subfamily of conserved, often subtelomeric COS genes; required for the multivesicular vesicle body sorting pathway that internalizes plasma membrane proteins for degradation; Cos proteins provide ubiquitin in trans for nonubiquitinated cargo proteins Cos6p
YER189W	1.69256	0.000364155	0.0017885	6.17	5.215	1.18	2.289	No	YER189W	hypothetical protein
YGL029W	1.65209	8.50896e-23	6.57653e-21	162.596	212.338	54.688	64.253	No	CGR1	Protein involved in nucleolar integrity and processing of pre-rRNA; has a role in processing rRNA for the 60S ribosome subunit; transcript is induced in response to cytotoxic stress but not genotoxic stress; relocalizes from nucleus to nucleolus upon DNA replication stress Cgr1p
YPR201W	1.63955	7.29371e-05	0.000439418	5.562	6.882	2.148	1.902	No	ARR3	Plasma membrane metalloid/H+ antiporter; member of bile/arsenite/riboflavin transporter (BART) superfamily; transports arsenite and antimonite; required for resistance to arsenic compounds; transcription is activated by Arr1p in the presence of arsenite Arr3p
YPR202W	1.62693	3.01427e-18	1.50049e-16	40.687	44.582	12.793	14.725	No	YPR202W	hypothetical protein; similar to telomere-encoded helicases; down-regulated at low calcium levels; YPR202W is not an essential gene; transcript is predicted to be spliced but there is no evidence that it is spliced in vivo hypothetical protein
YEL048C	1.60584	2.17168e-21	1.48331e-19	73.948	67.559	21.011	25.328	No	TCA17	Component of transport protein particle (TRAPP) complex II; TRAPPII is a multimeric guanine nucleotide-exchange factor for the GTPase Ypt1p, regulating intra-Golgi and endosome-Golgi traffic; promotes association of TRAPPII-specific subunits with the TRAPP core complex; sedlin related; human Sedlin mutations cause SEDT, a skeletal disorder Tca17p
YER137C	1.59476	1.62769e-31	2.12468e-29	105.457	107.848	33.838	36.61	No	YER137C	hypothetical protein
YKL102C	1.57976	2.28726e-22	1.72248e-20	53.612	56.428	18.43	18.262	No	YKL102C	hypothetical protein; conserved across S. cerevisiae strains; deletion confers sensitivity to citric acid; predicted protein would include a thiol-disulfide oxidoreductase active site hypothetical protein
YOR391C	1.55881	1.05523e-08	1.4972e-07	17.036	24.088	6.486	7.496	No	HSP33	Possible chaperone and cysteine protease; required for transcriptional reprogramming during the diauxic shift and for survival in stationary phase; similar to E. coli Hsp31 and S. cerevisiae Hsp31p, Hsp32p, and Sno4p; member of the DJ-1/ThiJ/PfpI superfamily, which includes human DJ-1 involved in Parkinson's disease and cancer glutathione-independent methylglyoxalase family protein
YCR106W	1.55881	0.0135355	0.0371841	2.562	2.223	0.781	0.861	Yes	RDS1	Putative zinc cluster transcription factor; involved in conferring resistance to cycloheximide Rds1p
YDR545W	1.53824	1.27091e-14	4.03531e-13	30.714	30.201	10.255	10.611	No	YRF1-1	Helicase encoded by the Y' element of subtelomeric regions; highly expressed in the mutants lacking the telomerase component TLC1; potentially phosphorylated by Cdc28p Y' element ATP-dependent helicase protein 1 copy 1
YLR467W	1.53824	1.27091e-14	4.03531e-13	30.714	30.201	10.255	10.611	No	YRF1-5	Helicase encoded by the Y' element of subtelomeric regions; highly expressed in the mutants lacking the telomerase component TLC1; potentially phosphorylated by Cdc28p Y' element ATP-dependent helicase protein 1 copy 5
YOR396W	1.53824	1.27091e-14	4.03531e-13	30.714	30.201	10.255	10.611	No	YRF1-8	One of several telomeric Y' element-encoded DNA helicases; known as Y'-Help1 (Y'-HELicase Protein 1) Y' element ATP-dependent helicase protein 1 copy 8
YGR280C	1.5323	3.17899e-29	3.59104e-27	174.969	200.294	61.063	68.341	No	PXR1	Essential protein involved in rRNA and snoRNA maturation; competes with TLC1 RNA for binding to Est2p, suggesting a role in negative regulation of telomerase; human homolog inhibits telomerase; contains a G-patch RNA interacting domain telomerase inhibitor
YHR215W	1.5259	9.67316e-06	7.36967e-05	8.06	10.506	3.268	3.253	No	PHO12	One of three repressible acid phosphatases; glycoprotein that is transported to the cell surface by the secretory pathway; pregulated by phosphate starvation; PHO12 has a paralog, PHO11, that arose from a segmental duplication acid phosphatase PHO12
YHR199C-A	1.51111	9.37742e-19	5.14794e-17	111.992	90.573	32.845	37.961	No	NBL1	Subunit of the conserved chromosomal passenger complex (CPC); complex regulates mitotic chromosome segregation; not required for the kinase activity of the complex; mediates the interaction of Sli15p and Bir1p; other complex members are Ipl1p, Sli15p, and Bir1p Nbl1p
YMR269W	1.49302	2.22458e-17	1.02087e-15	90.505	100.455	28.999	38.676	No	TMA23	Nucleolar protein implicated in ribosome biogenesis; deletion extends chronological lifespan Tma23p
YPR204W	1.48961	1.80635e-18	9.47366e-17	96.164	126.332	38.516	40.552	No	YPR204W	DNA helicase encoded within the telomeric Y' element; Y' -helicase protein 1 Y' element ATP-dependent helicase
YFL068W	1.48775	3.16314e-21	2.13566e-19	147.79	156.579	60.927	47.29	No	YFL068W	hypothetical protein; SWAT-GFP and mCherry fusion proteins localize to the cytosol hypothetical protein
YOR315W	1.47443	1.56674e-21	1.0956e-19	112.592	94.715	36.555	37.824	No	SFG1	Nuclear protein putative transcription factor; required for growth of superficial pseudohyphae (which do not invade the agar substrate) but not for invasive pseudohyphal growth; may act together with Phd1p; potential Cdc28p substrate Sfg1p
YOR390W	1.4719	1.17563e-11	2.51115e-10	23.701	24.788	8.532	8.925	No	FEX1	Protein involved in fluoride export; nearly identical to FEX2, and deletion of both proteins results in a large increase in fluoride sensitivity compared with the single mutant; contains two FEX domains connected by a linker; part of a widespread family of conserved fluoride export proteins fluoride transporter
YJL114W	1.46935	0.0177284	0.0465016	2.481	2.817	1.239	0.688	No	YJL114W	Retrotransposon TYA Gag gene co-transcribed with TYB Pol; translated as TYA or TYA-TYB polyprotein; Gag is a nucleocapsid protein that is the structural constituent of virus-like particles (VLPs); similar to retroviral Gag gag protein
YNR073C	1.447	4.74564e-06	3.89873e-05	10.484	12.417	3.582	4.759	No	MAN2	Mannitol dehydrogenase; MAN2 has a paralog, DSF1, that arose from a segmental duplication putative mannitol dehydrogenase
YAL065C	1.44085	0.00312131	0.0109788	10.249	6.357	1.681	4.424	No	YAL065C	hypothetical protein; shows sequence similarity to FLO1 and other flocculins hypothetical protein
YFR054C	1.44039	0.00731131	0.0224264	3.478	3.182	1.384	1.024	No	YFR054C	hypothetical protein; conserved among S. cerevisiae strains hypothetical protein
YLR385C	1.44005	0.000264038	0.00136648	6.422	6.167	2.165	2.444	No	SWC7	hypothetical protein; component of the Swr1p complex that incorporates Htz1p into chromatin Swc7p
YIR021W-A	1.43618	6.98553e-06	5.5004e-05	11.7	12.455	3.506	5.387	No	YIR021W-A	hypothetical protein; identified by expression profiling and mass spectrometry hypothetical protein
YKL222C	1.42984	2.64797e-07	2.84354e-06	13.8	13.034	5.077	4.837	Yes	YKL222C	hypothetical protein; may interact with ribosomes, based on co-purification experiments; similar to transcriptional regulators from the zinc cluster (binuclear cluster) family; null mutant is sensitive to caffeine hypothetical protein
YDR403W	1.42479	1.39997e-11	2.94747e-10	29.555	36.52	11.596	12.935	No	DIT1	Sporulation-specific enzyme required for spore wall maturation; involved in the production of a soluble LL-dityrosine-containing precursor of the spore wall; transcripts accumulate at the time of prospore enclosure Dit1p
YNL162W-A	1.41956	1.00638e-26	1.01922e-24	172.131	171.006	68.61	59.27	No	YNL162W-A	hypothetical protein; identified by homology hypothetical protein
YCL067C	1.41813	1.1315e-17	5.36003e-16	110.913	104.84	45.409	35.061	No	HMLALPHA2	Silenced copy of ALPHA2 at HML; homeobox-domain protein that associates with Mcm1p in haploid cells to repress a-specific gene expression and interacts with a1p in diploid cells to repress haploid-specific gene expression homeodomain mating type protein alpha2
YCR039C	1.41813	1.1315e-17	5.36003e-16	110.913	104.84	45.409	35.061	No	MATALPHA2	Homeobox-domain protein; with Mcm1p, represses a-specific genes in haploids; acts with A1p to repress transcription of haploid-specific genes in diploids; one of two genes encoded by the MATalpha mating type cassette homeodomain mating type protein alpha2
YLL025W	1.41504	2.31107e-10	4.18989e-09	31.898	28.61	12.87	9.742	No	PAU17	hypothetical protein; member of the seripauperin multigene family encoded mainly in subtelomeric regions; SWAT-GFP and mCherry fusion proteins localize to the vacuole; YLL025W is not an essential gene seripauperin PAU17
YNL336W	1.40074	1.07146e-06	1.02839e-05	17.368	28.709	8.735	8.684	No	COS1	Endosomal protein involved in turnover of plasma membrane proteins; member of the DUP380 subfamily of conserved, often subtelomeric COS genes; required for the multivesicular vesicle body sorting pathway that internalizes plasma membrane proteins for degradation; Cos proteins provide ubiquitin in trans for nonubiquitinated cargo proteins Cos1p
YLR466W	1.38211	8.42744e-22	6.11145e-20	95.013	86.691	34.186	35.285	No	YRF1-4	Helicase encoded by the Y' element of subtelomeric regions; highly expressed in the mutants lacking the telomerase component TLC1; potentially phosphorylated by Cdc28p Y' element ATP-dependent helicase protein 1 copy 4
YPL163C	1.37628	5.83234e-16	2.15466e-14	247.449	346.603	109.953	118.127	No	SVS1	Cell wall and vacuolar protein; required for wild-type resistance to vanadate; SVS1 has a paralog, SRL1, that arose from the whole genome duplication Svs1p
YOR072W	1.36683	0.000557828	0.0025283	7.581	13.962	4.983	3.374	No	YOR29-23	hypothetical protein; conserved across S. cerevisiae strains; partially overlaps the dubious gene YOR072W-A; diploid deletion strains are methotrexate, paraquat and wortmannin sensitive hypothetical protein
YPR153W	1.36495	2.34727e-12	5.58212e-11	48.066	64.514	22.293	21.378	No	MAY24	hypothetical protein
YHR219W	1.36367	1.77425e-15	6.16683e-14	53.426	63.859	23.337	22.126	No	YHR219W	hypothetical protein with similarity to helicases; located in the telomere region on the right arm of chromosome VIII hypothetical protein
YCL058C	1.35175	3.28682e-17	1.41962e-15	62.604	71.449	25.077	27.316	Yes	FYV5	Protein involved in regulation of the mating pathway; binds with Matalpha2p to promoters of haploid-specific genes; required for survival upon exposure to K1 killer toxin; involved in ion homeostasis Fyv5p
YLR042C	1.34159	4.57182e-11	8.92188e-10	62.969	86.599	32.684	26.154	No	YLR042C	Cell wall hypothetical protein; localizes to the cytoplasm; deletion improves xylose fermentation in industrially engineered strains; YLR042C is not an essential gene hypothetical protein
YNL334C	1.33521	7.80708e-07	7.78587e-06	15.925	22.055	8.065	6.988	No	SNO2	hypothetical protein; nearly identical to Sno3p; expression is induced before the diauxic shift and also in the absence of thiamin putative pyridoxal 5'-phosphate synthase
YPR200C	1.3203	1.68496e-05	0.000118817	10.338	13.955	4.712	5.043	No	ARR2	Arsenate reductase required for arsenate resistance; converts arsenate to arsenite which can then be exported from cells by Arr3p Arr2p
YHR213W	1.3079	0.00470508	0.0153628	4.216	7.925	2.156	2.806	No	YHR213W	Pseudogenic fragment with similarity to flocculins; YHR213W has a paralog, YAR062W, that arose from a segmental duplication hypothetical protein
YCL001W-B	1.30376	2.11146e-07	2.30963e-06	34.014	24.187	10.433	13.073	No	YCL001W-B	hypothetical protein; present in a region duplicated between chromosomes XIV and III; YCL001W-B has a paralog, DOM34, that arose from the whole genome duplication hypothetical protein
YEL049W	1.29817	1.87227e-14	5.75797e-13	64.785	60.844	27.93	23.013	No	PAU2	Member of the seripauperin multigene family; encoded mainly in subtelomeric region; active during alcoholic fermentation; regulated by anaerobiosis; negatively regulated by oxygen; repressed by heme seripauperin PAU2
YNL146C-A	1.29064	0.0146525	0.0395009	16.541	5.299	5.858	3.012	No	YNL146C-A	hypothetical protein
YGL254W	1.29058	1.25888e-13	3.47168e-12	41.839	44.438	16.86	18.383	Yes	FZF1	Transcription factor involved in sulfite metabolism; sole identified regulatory target is SSU1; overexpression suppresses sulfite-sensitivity of many unrelated mutants due to hyperactivation of SSU1, contains five zinc fingers; protein abundance increases in response to DNA replication stress Fzf1p
YFL060C	1.28244	0.000303062	0.00154262	9.333	17.236	5.204	5.714	No	SNO3	hypothetical protein; nearly identical to Sno2p; expression is induced before the diauxic shift and also in the absence of thiamin putative pyridoxal 5'-phosphate synthase
YDR256C	1.2779	3.75271e-14	1.11895e-12	90.829	75.674	36.674	31.782	No	CTA1	Catalase A; breaks down hydrogen peroxide in the peroxisomal matrix formed by acyl-CoA oxidase (Pox1p) during fatty acid beta-oxidation catalase A
YOL164W	1.27656	2.19826e-10	4.01012e-09	31.801	28.991	13.175	11.868	No	BDS1	Bacterially-derived sulfatase; required for use of alkyl- and aryl-sulfates as sulfur sources sulfuric ester hydrolase
YAL064W	1.2736	0.00152924	0.005993	5.96	7.514	2.216	3.374	No	YAL064W	hypothetical protein; may interact with ribosomes, based on co-purification experiments hypothetical protein
YHR044C	1.27019	9.28708e-16	3.34677e-14	53.28	56.832	22.726	22.815	No	DOG1	2-deoxyglucose-6-phosphate phosphatase; member of a family of low molecular weight phosphatases; confers 2-deoxyglucose resistance when overexpressed; DOG1 has a paralog, DOG2, that arose from a single-locus duplication; the last half of DOG1 and DOG2 are subject to gene conversions among S. cerevisiae, S. paradoxus, and S. mikatae 2-deoxyglucose-6-phosphatase
YDR077W	1.26588	4.98399e-17	2.12145e-15	8321.54	11288.6	4046.25	4078.5	No	SED1	Major stress-induced structural GPI-cell wall glycoprotein; associates with translating ribosomes, possible role in mitochondrial genome maintenance; ORF contains two distinct variable minisatellites; SED1 has a paralog, SPI1, that arose from the whole genome duplication Sed1p
YCR063W	1.2556	1.16807e-10	2.19911e-09	37.339	32.165	14.449	14.536	No	BUD31	Component of the SF3b subcomplex of the U2 snRNP; increases efficiency of first and second step pre-mRNA splicing; diploid mutants display a random budding pattern instead of the wild-type bipolar pattern; facilitates passage through G1/S Start, but is not required for G2/M transition or exit from mitosis U2 snRNP complex subunit BUD31
YDR179C	1.25388	1.66788e-12	4.09921e-11	60.723	71.868	24.916	30.586	No	CSN9	Subunit of the Cop9 signalosome; Cop9 signalosome is required for deneddylation, or removal of the ubiquitin-like protein Rub1p from Cdc53p (cullin); involved in adaptation to pheromone signaling Csn9p
YCR101C	1.25031	0.00384665	0.0130007	5.092	8.702	2.318	3.477	No	YCR101C	hypothetical protein; localizes to the membrane fraction; YCR101C is not an essential gene hypothetical protein
YKR041W	1.24461	2.49589e-05	0.000169686	12.892	10.826	5.153	4.811	No	YKR041W	hypothetical protein; localizes to the mitotic spindle; overexpression of YKR041W affects endocytic protein trafficking hypothetical protein
YPR168W	1.23573	9.55434e-12	2.06332e-10	55.915	55.469	20.544	26.593	No	NUT2	Subunit of the RNA polymerase II mediator complex; conserved from yeast to human; associates with core polymerase subunits to form the RNA polymerase II holoenzyme; required for transcriptional activation and has a role in basal transcription; protein abundance increases in response to DNA replication stress mediator complex subunit NUT2
YOR174W	1.22608	4.71068e-19	2.63529e-17	96.091	94.821	42.421	38.994	No	MED4	Subunit of the RNA polymerase II mediator complex; associates with core polymerase subunits to form the RNA polymerase II holoenzyme; essential for transcriptional regulation Med4p
YLL067C	1.22581	0.000255923	0.00133035	8.092	8.443	3.387	3.658	No	YLL067C	Putative Y' element ATP-dependent helicase Y' element ATP-dependent helicase
YLR315W	1.22495	4.11315e-09	6.27549e-08	33.049	31.587	15.484	12.057	No	NKP2	Central kinetochore protein and subunit of the Ctf19 complex; mutants have elevated rates of chromosome loss; orthologous to fission yeast kinetochore protein cnl2 Nkp2p
YOL007C	1.22161	8.91086e-16	3.23101e-14	106.527	131.669	50.647	51.266	No	CSI2	hypothetical protein; green fluorescent protein (GFP)- fusion protein localizes to the mother side of the bud neck and the vacuole; YOL007C is not an essential gene Csi2p
YML053C	1.21721	3.39761e-22	2.49469e-20	130.495	136.572	58.788	55.733	No	YML053C	hypothetical protein; green fluorescent protein (GFP)-fusion protein localizes to the cytoplasm and the nucleus; overexpression causes a cell cycle delay or arrest; YML053C is not an essential gene hypothetical protein
YCR105W	1.21387	2.32356e-05	0.000158889	11.554	12.958	4.813	5.732	No	ADH7	NADPH-dependent medium chain alcohol dehydrogenase; has broad substrate specificity; member of the cinnamyl family of alcohol dehydrogenases; may be involved in fusel alcohol synthesis or in aldehyde tolerance NADP-dependent alcohol dehydrogenase
YDR039C	1.21224	1.30083e-05	9.57531e-05	12.325	15.203	6.121	5.749	No	ENA2	P-type ATPase sodium pump; involved in Na+ efflux to allow salt tolerance; likely not involved in Li+ efflux Na(+)-exporting P-type ATPase ENA2
YDR405W	1.21107	3.01619e-26	3.0029e-24	244.173	233.152	101.294	104.306	No	MRP20	Mitochondrial ribosomal protein of the large subunit mitochondrial 54S ribosomal protein YmL41
YNL282W	1.19766	8.84037e-15	2.95047e-13	71.75	64.377	29.789	29.364	No	POP3	Subunit of both RNase MRP and nuclear RNase P; RNase MRP cleaves pre-rRNA, while nuclear RNase P cleaves tRNA precursors to generate mature 5' ends and facilitates turnover of nuclear RNAs; relocalizes to the cytosol in response to hypoxia Pop3p
YOR010C	1.19587	8.71446e-17	3.57963e-15	73.477	79.024	33.55	32.824	No	TIR2	Putative cell wall mannoprotein; member of the Srp1p/Tip1p family of serine-alanine-rich proteins; transcription is induced by cold shock and anaerobiosis; TIR2 has a paralog, TIR3, that arose from the whole genome duplication putative GPI-anchored mannoprotein
YDL242W	1.19011	1.87e-07	2.08829e-06	21.317	26.684	10.892	10.121	No	YDL242W	hypothetical protein; conserved across S. cerevisiae strains hypothetical protein
YHR146W	1.18905	2.38706e-16	9.16443e-15	167.42	208.577	82.117	82.377	No	CRP1	Protein that binds to cruciform DNA structures; CRP1 has a paralog, MDG1, that arose from the whole genome duplication Crp1p
YDL213C	1.18606	9.52943e-26	9.02837e-24	207.767	215.36	92.219	93.221	No	NOP6	rRNA-binding protein required for 40S ribosomal subunit biogenesis; contains an RNA recognition motif (RRM); hydrophilin essential to overcome the stress of the desiccation-rehydration process; NOP6 may be a fungal-specific gene as no homologs have been yet identified in higher eukaryotes Nop6p
YNL227C	1.18446	2.94864e-15	1.01884e-13	70.477	72.507	29.551	33.185	No	JJJ1	Co-chaperone that stimulates the ATPase activity of Ssa1p; required for a late step of ribosome biogenesis; associated with the cytosolic large ribosomal subunit; contains a J-domain; mutation causes defects in fluid-phase endocytosis Jjj1p
YNR051C	1.17675	1.39517e-18	7.45019e-17	147.66	160.18	63.525	72.265	No	BRE5	Ubiquitin protease cofactor; forms deubiquitination complex with Ubp3p that coregulates anterograde and retrograde transport between the endoplasmic reticulum and Golgi compartments; null is sensitive to brefeldin A Bre5p
YML123C	1.1736	3.59071e-11	7.07779e-10	49.347	44.324	22.072	19.329	No	PHO84	High-affinity inorganic phosphate (Pi) transporter; also low-affinity manganese transporter; regulated by Pho4p and Spt7p; mutation confers resistance to arsenate; exit from the ER during maturation requires Pho86p; cells overexpressing Pho84p accumulate heavy metals but do not develop symptoms of metal toxicity phosphate transporter PHO84
YJR154W	1.16761	7.7392e-08	9.23984e-07	22.492	21.659	9.635	9.94	No	YJR154W	hypothetical protein; green fluorescent protein (GFP)-fusion protein localizes to the cytoplasm hypothetical protein
YHL047C	1.16273	2.95393e-08	3.81349e-07	28.939	36.916	15.357	13.994	No	ARN2	Transporter; member of the ARN family of transporters that specifically recognize siderophore-iron chelates; responsible for uptake of iron bound to the siderophore triacetylfusarinine C siderophore transporter
YPL148C	1.16068	2.20866e-13	5.95122e-12	109.024	89.766	45.57	43.108	No	PPT2	Phosphopantetheine:protein transferase (PPTase); activates mitochondrial acyl carrier protein (Acp1p) by phosphopantetheinylation holo-[acyl-carrier-protein] synthase
YDR365C	1.1603	3.20048e-23	2.54049e-21	196.634	211.066	92.219	89.667	No	ESF1	Nucleolar protein involved in pre-rRNA processing; depletion causes severely decreased 18S rRNA levels Esf1p
YMR303C	1.15285	1.72647e-17	7.98525e-16	89.451	95.309	41.895	41.008	No	ADH2	Glucose-repressible alcohol dehydrogenase II; catalyzes the conversion of ethanol to acetaldehyde; involved in the production of certain carboxylate esters; regulated by ADR1 alcohol dehydrogenase ADH2
YOL159C-A	1.15019	2.26236e-08	3.0134e-07	139.779	101.681	62.116	46.404	No	YOL159C-A	hypothetical protein; overexpression affects endocytic protein trafficking; identified by sequence comparison with hemiascomycetous yeast species hypothetical protein
YER092W	1.14539	2.4812e-20	1.51819e-18	333.421	300.079	136.44	149.126	No	IES5	Non-essential INO80 chromatin remodeling complex subunit; deletion affects telomere maintenance via recombination Ies5p
YHR105W	1.14509	1.97834e-07	2.17617e-06	22.76	21.248	9.508	10.345	No	YPT35	Endosomal hypothetical protein; contains a phox (PX) homology domain; binds to both phosphatidylinositol-3-phosphate (PtdIns(3)P) and proteins involved in ER-Golgi or vesicular transport Ypt35p
YOR305W	1.14071	1.36906e-15	4.81548e-14	160.252	142.503	63.627	73.307	No	RRG7	hypothetical protein; green fluorescent protein (GFP)-fusion protein localizes to the mitochondrion; deletion confers sensitivity to 4-(N-(S-glutathionylacetyl)amino) phenylarsenoxide (GSAO); YOR305W is not an essential gene Rrg7p
YBR302C	1.13645	3.50594e-07	3.6644e-06	24.163	31.823	12.997	12.47	No	COS2	Endosomal protein involved in turnover of plasma membrane proteins; member of the DUP380 subfamily of conserved, often subtelomeric COS genes; required for the multivesicular vesicle body sorting pathway that internalizes plasma membrane proteins for degradation; Cos proteins provide ubiquitin in trans for nonubiquitinated cargo proteins Cos2p
YML132W	1.13645	3.50594e-07	3.6644e-06	24.163	31.823	12.997	12.47	No	COS3	Endosomal protein involved in turnover of plasma membrane proteins; member of the DUP380 subfamily of conserved, often subtelomeric COS genes; required for the multivesicular vesicle body sorting pathway that internalizes plasma membrane proteins for degradation; Cos proteins provide ubiquitin in trans for nonubiquitinated cargo proteins Cos3p
YGL243W	1.13374	1.15476e-09	1.87378e-08	36.69	42.268	16.851	19.08	No	TAD1	tRNA-specific adenosine deaminase; deaminates adenosine-37 to inosine in tRNA-Ala tRNA-specific adenosine deaminase
YHL043W	1.13348	1.90033e-11	3.93047e-10	55.372	56.741	27.862	23.107	No	ECM34	hypothetical protein; member of the DUP380 subfamily of conserved, often subtelomerically-encoded proteins; SWAT-GFP, seamless-GFP and mCherry C-terminal fusion proteins localize to the cytosol Ecm34p
YPL162C	1.13249	7.50418e-17	3.12621e-15	109.989	100.843	47.812	47.996	No	YPL162C	hypothetical protein; green fluorescent protein (GFP)-fusion protein localizes to the membrane of vacuole with cell cycle-correlated morphology hypothetical protein
YNL133C	1.12197	5.21295e-16	1.97554e-14	83.467	89.645	38.915	40.397	No	FYV6	hypothetical protein; required for survival upon exposure to K1 killer toxin; proposed to regulate double-strand break repair via non-homologous end-joining Fyv6p
YDL008W	1.10842	1.31208e-14	4.14362e-13	123.027	112.4	58.236	50.673	No	APC11	Catalytic core subunit, Anaphase-Promoting Complex/Cyclosome (APC/C); which is a ubiquitin-protein ligase required for degradation of anaphase inhibitors, including mitotic cyclins, during the metaphase/anaphase transition; contains a RING-H2 domain that is required for activity anaphase promoting complex subunit 11
YAR064W	1.09392	0.000464879	0.00217412	9.195	11.229	5.229	4.346	No	YAR064W	Pseudogenic fragment with similarity to flocculins; YAR064W has a paralog, YHR213W-B, that arose from a segmental duplication hypothetical protein
YDL085C-A	1.07631	9.23632e-08	1.09383e-06	171.312	257.438	112.457	90.183	No	YDL085C-A	hypothetical protein; green fluorescent protein (GFP)-fusion protein localizes to the cytoplasm and nucleus hypothetical protein
YPR203W	1.07576	0.000570477	0.00257174	12.592	13.49	7.606	4.699	No	YPR203W	hypothetical protein
YNL333W	1.0723	1.00838e-06	9.7261e-06	28.022	38.073	16.299	15.078	No	SNZ2	Member of a stationary phase-induced gene family; transcription of SNZ2 is induced prior to diauxic shift, and also in the absence of thiamin in a Thi2p-dependent manner; forms a coregulated gene pair with SNO2; interacts with Thi11p pyridoxine biosynthesis protein SNZ2
YOR394W	1.07114	0.00351659	0.012101	6.203	7.225	2.912	3.46	No	PAU21	hypothetical protein; member of the seripauperin multigene family encoded mainly in subtelomeric regions; SWAT-GFP, seamless-GFP and mCherry fusion proteins localize to the cytosol; identical to Pau22p; encodes two proteins that are translated from 2 different start codons seripauperin PAU21
YPL282C	1.07114	0.00351659	0.012101	6.203	7.225	2.912	3.46	No	PAU22	hypothetical protein; member of the seripauperin multigene family encoded mainly in subtelomeric regions; SWAT-GFP fusion protein localizes to the endoplasmic reticulum and vacuole, while mCherry fusion localizes to just the vacuole; identical to Pau21p; encodes two proteins that are translated from two different start codons seripauperin PAU22
YFR036W	1.06798	9.19242e-18	4.42592e-16	125.557	122.838	58.584	59.563	No	CDC26	Subunit of the Anaphase-Promoting Complex/Cyclosome (APC/C); which is a ubiquitin-protein ligase required for degradation of anaphase inhibitors, including mitotic cyclins, during the metaphase/anaphase transition; relocalizes to the cytosol in response to hypoxia anaphase promoting complex subunit CDC26
YAR023C	1.06615	6.46176e-10	1.10019e-08	40.469	39.763	19.746	18.408	No	YAR023C	Putative integral membrane protein; member of DUP240 gene family DUP240 family protein
YPR174C	1.06369	3.80921e-12	8.74035e-11	75.18	88.731	38.023	40.225	No	YPR174C	hypothetical protein; green fluorescent protein (GFP)-fusion protein localizes to the nuclear periphery; potential Cdc28p substrate; binds phosphatidylinositols and phosphatidylethanolamine in a large-scale study; relative distribution to foci at the nuclear periphery increases upon DNA replication stress; YPR174C has a paralog, NBP1, that arose from the whole genome duplication hypothetical prot…
YNR024W	1.0617	1.60205e-11	3.34891e-10	92.491	114.136	47.065	51.723	No	MPP6	Nuclear exosome-associated RNA binding protein; involved in surveillance of pre-rRNAs and pre-mRNAs, and the degradation of cryptic non-coding RNAs (ncRNA); copurifies with ribosomes; relocalizes to the cytosol in response to hypoxia Mpp6p
YDL245C	1.05977	1.06912e-09	1.7591e-08	42.885	45.922	22.675	19.742	No	HXT15	Putative transmembrane polyol transporter; supports growth on and uptake of mannitol, sorbitol and xylitol with moderate affinity when overexpressed in a strain deleted for hexose family members; minor hexose transport activity when overexpressed in a similar strain; similarity to hexose transporters; expression is induced by low levels of glucose and repressed by high levels of glucose hexose tr…
YDL186W	1.05934	1.1845e-08	1.66454e-07	46.858	39.154	21.317	19.768	No	YDL186W	hypothetical protein; YDL186W is not an essential gene hypothetical protein
YPR143W	1.05893	2.22512e-16	8.59892e-15	113.013	118.772	53.729	57.248	No	RRP15	Nucleolar protein; constituent of pre-60S ribosomal particles; required for proper processing of the 27S pre-rRNA at the A3 and B1 sites to yield mature 5.8S and 25S rRNAs Rrp15p
YOR389W	1.05847	1.88511e-10	3.49311e-09	42.909	45.58	21.478	20.904	No	YOR389W	hypothetical protein; expression regulated by copper levels hypothetical protein
YLR145W	1.05419	6.44131e-13	1.62387e-11	72.537	79.253	37.947	34.984	No	RMP1	Subunit of RNase MRP; RNase MRP processes pre-rRNA and has a role in cell cycle-regulated degradation of daughter cell-specific mRNAs; unlike most subunits, not shared between RNase MRP and nuclear RNase P Rmp1p
YLR156W	1.04862	0.00068405	0.00298543	9.535	13.14	5.739	5.25	No	YLR156W	hypothetical protein; exhibits a two-hybrid interaction with Jsn1p in a large-scale analysis; YLR156W has a paralog, YLR159W, that arose from a segmental duplication hypothetical protein
YLR159W	1.04862	0.00068405	0.00298543	9.535	13.14	5.739	5.25	No	YLR159W	hypothetical protein; YLR156W, YLR159W, and YLR161W are three identical open reading frames in S288C encoded near the ribosomal DNA region of chromosome 12; YLR159W has a paralog, YLR156W, that arose from a segmental duplication hypothetical protein
YLR161W	1.04862	0.00068405	0.00298543	9.535	13.14	5.739	5.25	No	YLR161W	hypothetical protein; YLR156W, YLR159W, and YLR161W are three identical open reading frames in S288C encoded near the ribosomal DNA region of chromosome 12; YLR161W has a paralog, YLR157W-D, that arose from a segmental duplication hypothetical protein
YBR209W	1.04673	0.00112384	0.00459709	8.692	11.564	5.263	4.527	No	YBR209W	hypothetical protein; conserved across S. cerevisiae strains; YBR209W is not an essential gene hypothetical protein
YDR536W	1.04258	2.24928e-05	0.000154169	31.647	24.332	15.569	11.446	No	STL1	Glycerol proton symporter of the plasma membrane; subject to glucose-induced inactivation, strongly but transiently induced when cells are subjected to osmotic shock glucose-inactivated glycerol proton symporter STL1
YKR060W	1.0393	3.27078e-11	6.51273e-10	56.669	62.915	28.006	30.035	No	UTP30	Putative subunit of U3-containing 90S preribosome complex; complex is involved in production of 18S rRNA and assembly of small ribosomal subunit Utp30p
YER180C-A	1.03918	6.42409e-10	1.09695e-08	62.645	65.473	27.692	34.45	No	SLO1	Protein interacting with Arl3p; Arl3p is a GTPase of the Ras superfamily involved in vesicle-tethering at the Golgi; putative ortholog of human SCOCO Slo1p
YPL199C	1.03673	5.84513e-17	2.47009e-15	220.716	198.246	102.482	101.087	No	YPL199C	hypothetical protein; predicted to be palmitoylated hypothetical protein
YBR056W-A	1.03281	1.02353e-14	3.35879e-13	745.753	927.484	416.815	398.273	No	YBR056W-A	hypothetical protein; mRNA identified as translated by ribosome profiling data; partially overlaps dubious ORF YBR056C-B; YBR056W-A has a paralog, YDR034W-B, that arose from the whole genome duplication hypothetical protein
YDR163W	1.02703	5.50412e-12	1.22005e-10	97.097	110.55	47.2	54.442	No	CWC15	Non-essential protein involved in pre-mRNA splicing; component of a complex containing Cef1p; has similarity to S. pombe Cwf15p U2-type spliceosomal complex subunit CWC15
YNR056C	1.02604	6.43996e-12	1.42212e-10	63.431	70.33	32.752	32.72	No	BIO5	Putative transmembrane protein involved in the biotin biosynthesis; responsible for uptake of 7-keto 8-aminopelargonic acid; BIO5 is in a cluster of 3 genes (BIO3, BIO4, and BIO5) that mediate biotin synthesis Bio5p
YBR197C	1.02572	4.28839e-13	1.1146e-11	139.536	128.654	70.648	60.716	No	YBR197C	hypothetical protein; green fluorescent protein (GFP)-fusion protein localizes to the cytoplasm and nucleus; YBR197C is not an essential gene; relative distribution to the nucleus increases upon DNA replication stress; YBR197C has a paralog, YPL077C, that arose from the whole genome duplication hypothetical protein
YKR097W	1.02253	5.32797e-06	4.31676e-05	22.257	21.431	11.775	9.69	No	PCK1	Phosphoenolpyruvate carboxykinase; key enzyme in gluconeogenesis, catalyzes early reaction in carbohydrate biosynthesis, glucose represses transcription and accelerates mRNA degradation, regulated by Mcm1p and Cat8p, located in the cytosol phosphoenolpyruvate carboxykinase PCK1
YBR008C	1.01777	3.57892e-09	5.50329e-08	72.213	58.301	32.658	31.636	No	FLR1	Plasma membrane transporter of the major facilitator superfamily; member of the 12-spanner drug:H(+) antiporter DHA1 family; involved in efflux of fluconazole, diazaborine, benomyl, methotrexate, and other drugs; expression induced in cells treated with the mycotoxin patulin; relocalizes from nucleus to plasma membrane upon DNA replication stress Flr1p
YJR108W	1.01772	7.83769e-05	0.000467872	13.703	14.328	6.69	7.083	No	ABM1	hypothetical protein; required for normal microtubule organization Abm1p
YPL233W	1.01636	4.66293e-12	1.05753e-10	78.148	80.136	41.614	36.412	No	NSL1	Essential component of the MIND kinetochore complex; joins kinetochore subunits contacting DNA to those contacting microtubules; required for accurate chromosome segregation; complex consists of Mtw1p Including Nnf1p-Nsl1p-Dsn1p (MIND) MIND complex subunit NSL1
YCL001W-A	1.01507	0.00405517	0.013565	8.943	8.23	3.277	5.189	No	YCL001W-A	hypothetical protein; YCL001W-A gene has similarity to DOM34 and is present in a region duplicated between chromosomes XIV and III hypothetical protein
YLR195C	1.01494	4.56786e-14	1.34158e-12	85.332	87.277	43.109	42.067	No	NMT1	N-myristoyl transferase; catalyzes the cotranslational, covalent attachment of myristic acid to the N-terminal glycine residue of several proteins involved in cellular growth and signal transduction glycylpeptide N-tetradecanoyltransferase NMT1
YPL258C	1.0141	1.94218e-09	3.0917e-08	42.917	42.063	21.766	20.164	No	THI21	Hydroxymethylpyrimidine (HMP) and HMP-phosphate kinase; involved in thiamine biosynthesis; member of a gene family with THI20 and THI22; functionally redundant with Thi20p bifunctional hydroxymethylpyrimidine kinase/phosphomethylpyrimidine kinase
YJL214W	1.0094	0.00469563	0.0153404	6.535	7.781	3.888	3.201	No	HXT8	hypothetical protein with similarity to hexose transporters; expression is induced by low levels of glucose and repressed by high levels of glucose hexose transporter HXT8
YJL148W	1.00795	3.31733e-11	6.5831e-10	136.576	158.452	66.216	80.062	No	RPA34	RNA polymerase I subunit A34.5; essential for nucleolar assembly and for high polymerase loading rate; nucleolar localization depends on Rpa49p DNA-directed RNA polymerase I subunit RPA34
YEL075C	1.00702	0.00361608	0.0123781	7.257	8.253	3.345	4.312	No	YEL075C	hypothetical protein
YIR039C	1.00664	7.85382e-06	6.13475e-05	18.982	20.114	10.17	9.32	No	YPS6	Putative GPI-anchored aspartic protease; member of the yapsin family of proteases involved in cell wall growth and maintenance aspartyl protease
YFR046C	1.00577	2.77713e-08	3.61704e-07	42.066	50.285	24.322	21.55	No	CNN1	Kinetochore protein; associated with the essential kinetochore proteins Nnf1p and Spc24p; phosphorylated by Clb5-Cdk1, Mps1p, Ipl1p and to a lesser extent by Clb2-Cdk1; localizes to the lower region of the Ndc80 complex during anaphase and regulates KMN activity by inhibiting the Mtw1 and Spc105 complexes from binding to the Ndc80 complex; similar to metazoan CENP-T centromere-binding protein CNN1
YIL127C	1.00485	1.41627e-11	2.97114e-10	83.532	92.591	46.64	40.862	No	RRT14	hypothetical protein; identified in a screen for mutants with decreased levels of rDNA transcription; green fluorescent protein (GFP)-fusion protein localizes to the nucleolus; predicted to be involved in ribosome biogenesis Rrt14p
YOL067C	1.00311	2.27537e-11	4.6408e-10	65.231	64.179	30.655	33.701	Yes	RTG1	Transcription factor (bHLH) involved in interorganelle communication; contributes to communication between mitochondria, peroxisomes, and nucleus; target of Hog1p; activated in stochastic pulses of nuclear localization Rtg1p
YGR029W	1.00251	1.33959e-13	3.65988e-12	92.686	101.315	49.255	47.316	No	ERV1	Flavin-linked sulfhydryl oxidase of the mitochondrial IMS; N-terminus is an intrinsically disordered domain that in the cytosol helps target Erv1p to mitochondria, and in the intermembrane space oxidizes Mia40p as part of a disulfide relay system that promotes intermembrane space retention of imported proteins; functional ortholog of human GFER (ALR); human GFER carrying N-terminal 21 amino acids…
YDR538W	1.00246	1.60458e-10	2.99215e-09	50.482	50.62	25.4	24.889	No	PAD1	Phenylacrylic acid decarboxylase; confers resistance to cinnamic acid, decarboxylates aromatic carboxylic acids to the corresponding vinyl derivatives; also has mRNA binding activity; homolog of E. coli UbiX; co-overproduction of Pad1p and Fdc1p greatly increases cinnamic acid decarboxylase activity phenylacrylic acid decarboxylase PAD1
YBR264C	1.00156	1.92942e-10	3.5528e-09	70.088	82.793	36.266	39.872	No	YPT10	Rab family GTP-binding protein; contains the PEST signal sequence specific for proteolytic enzymes; may be involved in vesicular transport; overexpression leads to accumulation of Golgi-like cisternae with budding vesicles Rab family GTPase YPT10
YDR185C	1.00094	3.89502e-13	1.0214e-11	84.675	92.355	43.278	44.95	No	UPS3	Mitochondrial hypothetical protein; similar to Ups1p and Ups2p which are involved in regulation of mitochondrial cardiolipin and phosphatidylethanolamine levels; null is viable but interacts synthetically with ups1 and ups2 mutations; UPS3 has a paralog, UPS2, that arose from the whole genome duplication Ups3p
YJL219W	1.00044	3.99611e-05	0.000260537	15.876	17.86	8.922	7.918	No	HXT9	Putative hexose transporter that is nearly identical to Hxt11p; has similarity to major facilitator superfamily (MFS) transporters, expression of HXT9 is regulated by transcription factors Pdr1p and Pdr3p hexose transporter HXT9
YBR012W-B	-1.0016	5.16991e-08	6.37984e-07	16.784	15.698	32.514	32.221	No	YBR012W-B	Retrotransposon TYA Gag and TYB Pol genes; transcribed/translated as one unit; polyprotein is processed to make a nucleocapsid-like protein (Gag), reverse transcriptase (RT), protease (PR), and integrase (IN); similar to retroviral genes gag-pol fusion protein
YLR108C	-1.0037	7.20695e-09	1.0427e-07	19.541	18.546	38.405	37.669	No	YLR108C	hypothetical protein; green fluorescent protein (GFP)-fusion protein localizes to the nucleus; YLR108C is not an esssential gene; protein abundance increases in response to DNA replication stress; YLR108C has a paralog, YDR132C, that arose from the whole genome duplication hypothetical protein
YNL327W	-1.00533	1.34434e-05	9.761e-05	55.307	33.277	83.263	93.953	No	EGT2	Glycosylphosphatidylinositol (GPI)-anchored cell wall endoglucanase; required for proper cell separation after cytokinesis; expression is activated by Swi5p and tightly regulated in a cell cycle-dependent manner Egt2p
YJL166W	-1.00647	1.56703e-13	4.26145e-12	249.833	205.631	440.78	471.553	No	QCR8	Subunit 8 of ubiquinol cytochrome-c reductase (Complex III); Complex III is a component of the mitochondrial inner membrane electron transport chain; oriented facing the intermembrane space; expression is regulated by Abf1p and Cpf1p ubiquinol--cytochrome-c reductase subunit 8
YDR042C	-1.00695	4.57847e-06	3.79322e-05	11.198	9.92	21.24	20.93	No	YDR042C	hypothetical protein; expression is increased in ssu72-ts69 mutant hypothetical protein
YEL065W	-1.00713	1.09282e-08	1.5468e-07	18.114	18.317	37.641	35.371	No	SIT1	Ferrioxamine B transporter; member of the ARN family of transporters that specifically recognize siderophore-iron chelates; transcription is induced during iron deprivation and diauxic shift; potentially phosphorylated by Cdc28p siderophore transporter
YGR250C	-1.01038	1.24562e-14	4.0202e-13	49.542	47.75	98.195	97.094	No	RIE1	Putative RNA binding protein; localizes to stress granules induced by glucose deprivation; interacts with Rbg1p in a two-hybrid assay; protein abundance increases in response to DNA replication stress Rie1p
YIL129C	-1.01207	4.50542e-05	0.000287661	9.146	7.659	15.926	17.754	No	TAO3	Component of the RAM signaling network; is involved in regulation of Ace2p activity and cellular morphogenesis, interacts with protein kinase Cbk1p and also with Kic1p Tao3p
YPL240C	-1.01217	4.64972e-16	1.77354e-14	357.633	426.579	812.483	764.47	No	HSP82	Hsp90 chaperone; redundant in function with Hsc82p; required for pheromone signaling, negative regulation of Hsf1p; docks with Tom70p for mitochondrial preprotein delivery; promotes telomerase DNA binding, nucleotide addition; protein abundance increases in response to DNA replication stress; contains two acid-rich unstructured regions that promote solubility of chaperone-substrate complexes; HSP…
YNL194C	-1.01367	2.74411e-11	5.53914e-10	30.252	28.405	59.96	57.953	No	YNL194C	Integral membrane protein; required for sporulation and plasma membrane sphingolipid content; similar to SUR7; GFP-fusion protein is induced in response to the DNA-damaging agent MMS; GFP-fusion protein is more abundant at MCCs (membrane compartment occupied by Can1) in the presence of glycerol and oleate; YNL194C has a paralog, FMP45, that arose from the whole genome duplication hypothetical pro…
YFL011W	-1.01529	0.00276031	0.00989267	3.6	4.758	9.126	7.806	No	HXT10	Putative hexose transporter; expressed at low levels and expression is repressed by glucose hexose transporter HXT10
YCL021W-A	-1.01712	4.69819e-11	9.13814e-10	27.617	29.006	54.9	59.373	No	YCL021W-A	hypothetical protein; SWAT-GFP and mCherry fusion proteins localize to the vacuole hypothetical protein
YJR085C	-1.01752	3.91689e-14	1.16201e-12	155.193	157.813	285.231	346.559	No	YJR085C	hypothetical protein; GFP-fusion protein is induced in response to the DNA-damaging agent MMS; the authentic, non-tagged protein is detected in highly purified mitochondria in high-throughput studies; protein abundance increases in response to DNA replication stress hypothetical protein
YLR304C	-1.02189	4.39274e-12	1.00011e-10	58.299	49.082	106.124	111.036	No	ACO1	Aconitase; required for the tricarboxylic acid (TCA) cycle and also independently required for mitochondrial genome maintenance; component of the mitochondrial nucleoid; mutation leads to glutamate auxotrophy; human homolog ACO2 can complement yeast null mutant aconitate hydratase ACO1
YJL164C	-1.02264	3.93979e-11	7.73991e-10	30.633	28.915	62.872	57.661	No	TPK1	cAMP-dependent protein kinase catalytic subunit; promotes vegetative growth in response to nutrients via the Ras-cAMP signaling pathway; inhibited by regulatory subunit Bcy1p in the absence of cAMP; phosphorylates and inhibits Whi3p to promote G1/S phase passage; partially redundant with Tpk2p and Tpk3p; phosphorylates pre-Tom40p, which impairs its import into mitochondria under non-respiratory c…
YPL262W	-1.02275	2.64704e-13	7.09987e-12	60.95	55.233	123.867	111.277	No	FUM1	Fumarase; converts fumaric acid to L-malic acid in the TCA cycle; cytosolic and mitochondrial distribution determined by the N-terminal targeting sequence, protein conformation, and status of glyoxylate shunt; phosphorylated in mitochondria fumarase FUM1
YLR327C	-1.02453	4.20628e-17	1.80348e-15	948.168	832.107	1894.56	1717.34	No	TMA10	hypothetical protein that associates with ribosomes; protein abundance increases in response to DNA replication stress; TMA10 has a paralog, STF2, that arose from the whole genome duplication Tma10p
YGR254W	-1.02933	3.484e-12	8.0255e-11	749.223	575.157	1369.48	1327.26	No	ENO1	Enolase I, a phosphopyruvate hydratase; catalyzes conversion of 2-phosphoglycerate to phosphoenolpyruvate during glycolysis and the reverse reaction during gluconeogenesis; expression repressed in response to glucose; protein abundance increases in response to DNA replication stress; N-terminally propionylated in vivo; ENO1 has a paralog, ENO2, that arose from the whole genome duplication phospho…
YIR037W	-1.02943	2.88379e-17	1.27364e-15	147.36	131.776	276.13	291.695	No	HYR1	Thiol peroxidase; functions as a hydroperoxide receptor to sense intracellular hydroperoxide levels and transduce a redox signal to the Yap1p transcription factor; HYR1 has a paralog, GPX1, that arose from the whole genome duplication peroxiredoxin HYR1
YKL150W	-1.03047	5.54059e-16	2.07296e-14	101.41	92.294	205.661	188.473	No	MCR1	Mitochondrial NADH-cytochrome b5 reductase; involved in ergosterol biosynthesis cytochrome-b5 reductase
YFL052W	-1.03361	0.00129799	0.00519019	6.349	4.286	9.992	11.532	Yes	ZNF1	Zinc cluster transcription factor that regulates respiratory growth; binds to promoters of genes involved in respiration, gluconeogenesis, and the glyoxylate shunt; required for normal carbon source utilization and stress response DNA-binding domain containing protein
YML128C	-1.03778	5.19396e-15	1.75341e-13	62.264	60.974	133.146	119.16	No	MSC1	hypothetical protein; mutant is defective in directing meiotic recombination events to homologous chromatids; the authentic, non-tagged protein is detected in highly purified mitochondria and is phosphorylated Msc1p
YKL151C	-1.03785	1.54966e-16	6.02829e-15	59.385	64.08	127.755	125.021	No	NNR2	Widely-conserved NADHX dehydratase; converts (S)-NADHX to NADH in ATP-dependent manner; YKL151C promoter contains STREs (stress response elements) and expression is induced by heat shock or methyl methanesulfonate; downstream intergenic region drives antisense expression and mediates coordinated regulation of YKL151C and GPM1 phosphoglycerate mutase; protein abundance increases in response to DNA…
YMR169C	-1.04108	7.78878e-13	1.94686e-11	35.466	33.079	69.578	70.768	No	ALD3	Cytoplasmic aldehyde dehydrogenase; involved in beta-alanine synthesis; uses NAD+ as the preferred coenzyme; very similar to Ald2p; expression is induced by stress and repressed by glucose aldehyde dehydrogenase (NAD(+)) ALD3
YDL039C	-1.04389	1.95702e-12	4.76994e-11	30.057	29.318	61.36	60.793	No	PRM7	Pheromone-regulated protein; predicted to have one transmembrane segment; promoter contains Gcn4p binding elements; in W303 strain one continuous open reading frame comprising of YDL037C, the intergenic region and YDL039C encodes the IMI1 pheromone-regulated protein PRM7
YFL051C	-1.04557	2.58618e-05	0.000174496	11.327	9.684	24.61	18.538	No	YFL051C	hypothetical protein; SWAT-GFP fusion protein localizes to the cell periphery while mCherry fusion protein localizes to both the cell periphery and vacuole; YFL051C is not an essential gene hypothetical protein
YOR347C	-1.0476	2.38563e-07	2.59503e-06	17.352	14.001	33.346	30.93	No	PYK2	Pyruvate kinase; appears to be modulated by phosphorylation; transcription repressed by glucose, and Pyk2p may be active under low glycolytic flux; PYK2 has a paralog, CDC19, that arose from the whole genome duplication pyruvate kinase PYK2
YNL234W	-1.04994	2.18316e-08	2.92783e-07	15.763	14.617	31.393	31.335	No	YNL234W	hypothetical protein with similarity to globins; has a functional heme-binding domain; mutant has aneuploidy tolerance; transcription induced by stress conditions; may be involved in glucose signaling or metabolism; regulated by Rgt1 hypothetical protein
YNL055C	-1.05032	3.35874e-12	7.76741e-11	602.438	457.983	1075.26	1115.49	No	POR1	Mitochondrial porin (voltage-dependent anion channel); outer membrane protein required for maintenance of mitochondrial osmotic stability and mitochondrial membrane permeability; couples the glutathione pools of the intermembrane space (IMS) and the cytosol; interacts with Om45 and Om14 in the outer membrane; phosphorylated; protein abundance increases in response to DNA replication stress porin …
YPR010C-A	-1.05441	9.37991e-16	3.35961e-14	91.129	102.336	211.926	188.732	No	YPR010C-A	hypothetical protein; SWAT-GFP, seamless-GFP and mCherry fusion proteins localize to the cytosol; conserved among Saccharomyces sensu stricto species hypothetical protein
YDL181W	-1.05648	1.22167e-18	6.64453e-17	127.787	124.338	275.4	247.399	No	INH1	Protein that inhibits ATP hydrolysis by the F1F0-ATP synthase; inhibitory function is enhanced by stabilizing proteins Stf1p and Stf2p; has a calmodulin-binding motif and binds calmodulin in vitro; INH1 has a paralog, STF1, that arose from the whole genome duplication ATPase inhibitor
YDR314C	-1.05755	0.000374634	0.0018232	4.849	5.268	9.763	11.231	No	RAD34	Protein involved in nucleotide excision repair (NER); homologous to RAD4 Rad34p
YLR142W	-1.06087	2.608e-10	4.71366e-09	22.509	26.113	52.43	48.857	No	PUT1	Proline oxidase; nuclear-encoded mitochondrial protein involved in utilization of proline as sole nitrogen source; PUT1 transcription is induced by Put3p in the presence of proline and the absence of a preferred nitrogen source proline dehydrogenase
YAL060W	-1.06119	3.23666e-18	1.59766e-16	93.618	87.932	195.143	182.311	No	BDH1	NAD-dependent (R,R)-butanediol dehydrogenase; catalyzes oxidation of (R,R)-2,3-butanediol to (3R)-acetoin, oxidation of meso-butanediol to (3S)-acetoin, and reduction of acetoin; enhances use of 2,3-butanediol as an aerobic carbon source (R,R)-butanediol dehydrogenase
YDR283C	-1.06328	1.54053e-05	0.000109988	8.757	7.37	16.851	16.636	No	GCN2	Protein kinase; phosphorylates the alpha-subunit of translation initiation factor eIF2 (Sui2p) in response to starvation; activated by uncharged tRNAs and the Gcn1p-Gcn20p complex; contributes to DNA damage checkpoint control serine/threonine-protein kinase GCN2
YMR280C	-1.06858	2.04862e-05	0.000140909	8.092	6.943	15.799	15.568	Yes	CAT8	Zinc cluster transcriptional activator; necessary for derepression of a variety of genes under non-fermentative growth conditions, active after diauxic shift, binds carbon source responsive elements; relative distribution to the nucleus increases upon DNA replication stress DNA-binding transcription factor CAT8
YBR093C	-1.06859	2.11255e-10	3.86577e-09	65.199	49.455	123.137	116.389	No	PHO5	Repressible acid phosphatase; 1 of 3 repressible acid phosphatases that also mediates extracellular nucleotide-derived phosphate hydrolysis; secretory pathway derived cell surface glycoprotein; induced by phosphate starvation and coordinately regulated by PHO4 and PHO2 acid phosphatase PHO5
YBR046C	-1.07385	1.57636e-08	2.15339e-07	21.876	17.426	40.553	41.559	No	ZTA1	NADPH-dependent quinone reductase; GFP-tagged protein localizes to the cytoplasm and nucleus; has similarity to E. coli quinone oxidoreductase and to human zeta-crystallin NADPH:quinone reductase
YGR256W	-1.07715	8.97963e-11	1.707e-09	27.211	32.135	66.106	58.84	No	GND2	6-phosphogluconate dehydrogenase (decarboxylating); catalyzes an NADPH regenerating reaction in the pentose phosphate pathway; required for growth on D-glucono-delta-lactone; GND2 has a paralog, GND1, that arose from the whole genome duplication phosphogluconate dehydrogenase (decarboxylating) GND2
YDR374C	-1.07818	0.000702977	0.00305873	4.622	7.902	13.277	13.279	No	PHO92	Posttranscriptional regulator of phosphate metabolism; facilitates PHO4 mRNA degradation by interacting with Pop2p; regulates PHO4 mRNA stability by binding to PHO4's 3'UTR in a phosphate-dependent manner; contains highly conserved YTH (YT521-B Homology) domain that exhibits RNA-binding activity; human homolog YTHDF2 can complement yeast null mutant mRNA-binding phosphate metabolism regulator
YDL022W	-1.07879	2.51803e-17	1.12052e-15	92.159	82.016	179.735	186.812	No	GPD1	NAD-dependent glycerol-3-phosphate dehydrogenase; key enzyme of glycerol synthesis, essential for growth under osmotic stress; expression regulated by high-osmolarity glycerol response pathway; protein abundance increases in response to DNA replication stress; constitutively inactivated via phosphorylation by the protein kinases Ypk1p and Ypk2p, dephosphorylation increases catalytic activity; for…
YER011W	-1.08138	8.16329e-10	1.37003e-08	19.152	22.748	43.083	45.578	No	TIR1	Cell wall mannoprotein; expression is downregulated at acidic pH and induced by cold shock and anaerobiosis; abundance is increased in cells cultured without shaking; member of the Srp1p/Tip1p family of serine-alanine-rich proteins GPI-anchored mannoprotein
YPL119C-A	-1.08332	3.34257e-05	0.000221356	8.457	13.376	24.127	22.376	No	YPL119C-A	hypothetical protein; identified by expression profiling and mass spectrometry hypothetical protein
YNL135C	-1.08369	5.61141e-16	2.08617e-14	617.196	505.283	1150.65	1222.3	No	FPR1	Peptidyl-prolyl cis-trans isomerase (PPIase); binds to the drugs FK506 and rapamycin; also binds to the nonhistone chromatin binding protein Hmo1p and may regulate its assembly or function; N-terminally propionylated in vivo; mutation is functionally complemented by human FKBP1A peptidylprolyl isomerase FPR1
YIR036C	-1.08378	2.02294e-12	4.89003e-11	45.504	38.119	90.555	85.829	No	IRC24	Putative benzil reductase;(GFP)-fusion protein localizes to the cytoplasm and is induced by the DNA-damaging agent MMS; sequence similarity with short-chain dehydrogenase/reductases; null mutant has increased spontaneous Rad52p foci sepiapterin reductase family protein IRC24
YOL151W	-1.08391	1.01471e-16	4.11062e-15	53.19	55.675	110.632	119.427	No	GRE2	3-methylbutanal reductase and NADPH-dependent methylglyoxal reductase; stress induced (osmotic, ionic, oxidative, heat shock and heavy metals); regulated by the HOG pathway; restores resistance to glycolaldehyde by coupling reduction of glycolaldehyde to ethylene glycol and oxidation of NADPH to NADP+; protein abundance increases in response to DNA replication stress; methylglyoxal reductase (NAD…
YDR277C	-1.08565	4.68017e-06	3.86114e-05	67.315	38.652	117.857	106.268	Yes	MTH1	Negative regulator of the glucose-sensing signal transduction pathway; required for repression of transcription by Rgt1p; interacts with Rgt1p and the Snf3p and Rgt2p glucose sensors; phosphorylated by Yck1p, triggering Mth1p degradation; MTH1 has a paralog, STD1, that arose from the whole genome duplication Mth1p
YBL064C	-1.08732	8.16644e-12	1.77666e-10	170.007	127.467	319.893	310.189	No	PRX1	Mitochondrial peroxiredoxin with thioredoxin peroxidase activity; has a role in reduction of hydroperoxides; reactivation requires Trr2p and glutathione; induced during respiratory growth and oxidative stress; phosphorylated; protein abundance increases in response to DNA replication stress thioredoxin peroxidase PRX1
YJR121W	-1.08934	6.79193e-14	1.92733e-12	165.953	131.646	320.326	310.895	No	ATP2	Beta subunit of the F1 sector of mitochondrial F1F0 ATP synthase; which is a large, evolutionarily conserved enzyme complex required for ATP synthesis; F1 translationally regulates ATP6 and ATP8 expression to achieve a balanced output of ATP synthase genes encoded in nucleus and mitochondria; phosphorylated F1F0 ATP synthase subunit beta
YHR162W	-1.0961	6.81168e-10	1.15432e-08	326.627	224.618	600.251	575.326	No	MPC2	Highly conserved subunit of the mitochondrial pyruvate carrier (MPC); expressed during growth on fermentable carbon sources, and heterodimerizes with Mpc1p to form the fermentative isoform of MPC; MPC localizes to the mitochondrial inner membrane and mediates pyruvate uptake; MPC2 paralog, MPC3, heterodimerizes with Mpc1p to form the respiratory MPC isoform mitochondrial pyruvate carrier
YDL081C	-1.10161	1.1306e-14	3.68952e-13	1638.51	1287.23	3226.72	3036.97	No	RPP1A	Ribosomal stalk protein P1 alpha; involved in the interaction between translational elongation factors and the ribosome; free (non-ribosomal) P1 stimulates the phosphorylation of the eIF2 alpha subunit (Sui2p) by Gcn2p; accumulation of P1 in the cytoplasm is regulated by phosphorylation and interaction with the P2 stalk component ribosomal protein P1A
YOR185C	-1.10301	3.49406e-21	2.30608e-19	83.986	83.211	182.757	175.349	No	GSP2	GTP binding protein (mammalian Ranp homolog); involved in the maintenance of nuclear organization, RNA processing and transport; interacts with Kap121p, Kap123p and Pdr6p (karyophilin betas); not required for viability; protein abundance increases in response to DNA replication stress; GSP2 has a paralog, GSP1, that arose from the whole genome duplication Ran GTPase GSP2
YMR173W	-1.11128	6.78008e-14	1.92733e-12	117.165	94.327	237.53	217.829	No	DDR48	DNA damage-responsive protein; expression is increased in response to heat-shock stress or treatments that produce DNA lesions; contains multiple repeats of the amino acid sequence NNNDSYGS; protein abundance increases in response to DNA replication stress DNA damage-responsive protein 48
YJL189W	-1.12304	1.02057e-13	2.84116e-12	691.192	553.55	1466.34	1238.12	No	RPL39	Ribosomal 60S subunit protein L39; required for ribosome biogenesis; loss of both Rpl31p and Rpl39p confers lethality; also exhibits genetic interactions with SIS1 and PAB1; homologous to mammalian ribosomal protein L39, no bacterial homolog ribosomal 60S subunit protein L39
YLR178C	-1.13372	4.8843e-25	4.48287e-23	126.035	123.584	277.226	268.742	No	TFS1	Inhibitor of carboxypeptidase Y (Prc1p), and Ras GAP (Ira2p); phosphatidylethanolamine-binding protein (PEBP) family member and ortholog of hPEBP1/RKIP, a natural metastasis suppressor; targets to vacuolar membranes during stationary phase; acetylated by NatB N-terminal acetyltransferase; protein abundance increases in response to DNA replication stress Tfs1p
YLR087C	-1.13435	0.000578145	0.00259833	3.989	4.088	7.853	9.725	No	CSF1	Protein required for fermentation at low temperature; plays a role in the maturation of secretory proteins; the authentic, non-tagged protein is detected in highly purified mitochondria in high-throughput studies Csf1p
YNL134C	-1.14131	1.70909e-22	1.30379e-20	86.013	82.184	184.387	185.375	No	YNL134C	NADH-dependent aldehyde reductase, involved in detoxification of furfural; expression is up-regulated in the presence of furfural and 5-hydroxymethylfurfural, which are compounds generated during lignocellulosic biomass pre-treatment; green fluorescent protein (GFP)-fusion protein localizes to both the cytoplasm and nucleus; protein abundance increases in response to DNA replication stress hypoth…
YBR006W	-1.1427	1.09887e-16	4.33207e-15	36.049	37.053	80.105	81.001	No	UGA2	Succinate semialdehyde dehydrogenase; involved in the utilization of gamma-aminobutyrate (GABA) as a nitrogen source; part of the 4-aminobutyrate and glutamate degradation pathways; localized to the cytoplasm succinate-semialdehyde dehydrogenase (NAD(P)(+))
YPL265W	-1.14504	2.14696e-12	5.16855e-11	29.701	25.907	58.593	63.866	No	DIP5	Dicarboxylic amino acid permease; mediates high-affinity and high-capacity transport of L-glutamate and L-aspartate; also a transporter for Gln, Asn, Ser, Ala, and Gly; relocalizes from plasma membrane to vacuole upon DNA replication stress Dip5p
YLR286C	-1.14952	0.00314076	0.011034	264.776	157.242	432.443	502.286	No	CTS1	Endochitinase; required for cell separation after mitosis; transcriptional activation during the G1 phase of the cell cycle is mediated by transcription factor Ace2p Cts1p
YDR148C	-1.15006	1.50919e-16	5.90998e-15	35.166	35.424	79.12	77.119	No	KGD2	Dihydrolipoyl transsuccinylase; component of the mitochondrial alpha-ketoglutarate dehydrogenase complex, which catalyzes the oxidative decarboxylation of alpha-ketoglutarate to succinyl-CoA in the TCA cycle; phosphorylated alpha-ketoglutarate dehydrogenase KGD2
YHR137W	-1.15056	8.91576e-09	1.27424e-07	20.117	15.835	37.37	41.929	No	ARO9	Aromatic aminotransferase II; catalyzes the first step of tryptophan, phenylalanine, and tyrosine catabolism aromatic-amino-acid:2-oxoglutarate transaminase
YML058W-A	-1.15852	4.78168e-13	1.22653e-11	50.255	62.077	134.945	115.347	No	HUG1	Ribonucleotide reductase inhibitor; intrinsically disordered protein that binds to and inhibits Rnr2p; involved in the Mec1p-mediated checkpoint pathway; transcription is induced by genotoxic stress and by activation of the Rad53p pathway; protein abundance increases in response to DNA replication stress Hug1p
YNL200C	-1.15922	8.01343e-17	3.31485e-15	63.845	55.972	138.358	128.136	No	NNR1	NADHX epimerase; catalyzes isomerization of (R)- and (S)-NADHX; homologous to AIBP in mammals and the N- terminal domain of YjeF in E.coli; enzyme is widespread in eukaryotes, prokaryotes and archaea; the authentic, non-tagged protein is detected in highly purified mitochondria in high-throughput studies NADHX epimerase
YOL084W	-1.15952	3.0363e-07	3.21355e-06	9.073	8.633	19.406	19.923	No	PHM7	hypothetical protein; expression is regulated by phosphate levels; green fluorescent protein (GFP)-fusion protein localizes to the cell periphery and vacuole; protein abundance increases in response to DNA replication stress Phm7p
YLR454W	-1.15965	5.36329e-05	0.000336581	6.154	4.895	12.114	12.333	No	FMP27	hypothetical protein; the authentic, non-tagged protein is detected in highly purified mitochondria in high-throughput studies Fmp27p
YGL205W	-1.16001	0.000653443	0.00287946	3.341	3.662	7.988	7.548	No	POX1	Fatty-acyl coenzyme A oxidase; involved in the fatty acid beta-oxidation pathway; localized to the peroxisomal matrix acyl-CoA oxidase
YLR258W	-1.17027	1.28138e-11	2.71727e-10	57.877	43.509	118.188	108.901	No	GSY2	Glycogen synthase; expression induced by glucose limitation, nitrogen starvation, heat shock, and stationary phase; activity regulated by cAMP-dependent, Snf1p and Pho85p kinases as well as by the Gac1p-Glc7p phosphatase; GSY2 has a paralog, GSY1, that arose from the whole genome duplication; relocalizes from cytoplasm to plasma membrane upon DNA replication stress glycogen (starch) synthase GSY2
YLR216C	-1.17074	1.11911e-21	8.01661e-20	268.45	316.47	674.023	638.968	No	CPR6	Peptidyl-prolyl cis-trans isomerase (cyclophilin); catalyzes the cis-trans isomerization of peptide bonds N-terminal to proline residues; plays a role in determining prion variants; binds to Hsp82p and contributes to chaperone activity; protein abundance increases in response to DNA replication stress peptidylprolyl isomerase CPR6
YJR104C	-1.17253	0.00104125	0.00431636	1027.14	626.888	1899.69	1822.43	No	SOD1	Cytosolic copper-zinc superoxide dismutase; detoxifies superoxide; stabilizes Yck1p and Yck2p kinases in glucose to repress respiration; phosphorylated by Dun1p, enters nucleus under oxidative stress to promote transcription of stress response genes; human ortholog SOD1 implicated in ALS complements a null allele; abundance increases under DNA replication stress and during exposure to boric acid;…
YGR161C-D	-1.17312	5.53351e-13	1.4023e-11	24.852	25.877	53.296	60.75	No	YGR161C-D	Retrotransposon TYA Gag and TYB Pol genes; transcribed/translated as one unit; polyprotein is processed to make a nucleocapsid-like protein (Gag), reverse transcriptase (RT), protease (PR), and integrase (IN); similar to retroviral genes gag-pol fusion protein
YGR088W	-1.17537	4.38761e-13	1.13537e-11	22.355	22.383	52.251	48.383	No	CTT1	Cytosolic catalase T; has a role in protection from oxidative damage by hydrogen peroxide catalase T
YDL004W	-1.18759	3.9641e-15	1.34596e-13	88.997	71.084	175.618	187.587	No	ATP16	Delta subunit of the central stalk of mitochondrial F1F0 ATP synthase; F1F0 ATP synthase is a large, evolutionarily conserved enzyme complex required for ATP synthesis; F1 translationally regulates ATP6 and ATP8 expression to achieve a balanced output of ATP synthase genes encoded in nucleus and mitochondria; phosphorylated F1F0 ATP synthase subunit delta
YBR169C	-1.19128	2.90376e-18	1.45784e-16	45.942	50.292	114.223	105.115	No	SSE2	Member of Hsp110 subclass of the heat shock protein 70 (HSP70) family; serves as nucleotide exchange factor to load ATP onto the SSA class of cytosolic Hsp70s; may be involved in protein folding; localized to the cytoplasm; SSE2 has a paralog, SSE1, that arose from the whole genome duplication adenyl-nucleotide exchange factor SSE2
YKR042W	-1.19172	1.92851e-19	1.09981e-17	838.179	729.3	1648.08	1923.07	No	UTH1	Mitochondrial inner membrane protein; role in mitophagy is disputed; implicated in cell wall biogenesis, the oxidative stress response, life span during starvation, and cell death; SUN family member; UTH1 has a paralog, NCA3, that arose from the whole genome duplication SUN family protein UTH1
YGL062W	-1.19793	5.47075e-19	3.03162e-17	42.131	40.258	94.638	93.712	No	PYC1	Pyruvate carboxylase isoform; cytoplasmic enzyme that converts pyruvate to oxaloacetate; differentially regulated than isoform Pyc2p; mutations in the human homolog are associated with lactic acidosis; PYC1 has a paralog, PYC2, that arose from the whole genome duplication pyruvate carboxylase 1
YKL096W	-1.20783	2.55563e-31	3.26343e-29	191.648	193.609	435.78	451.665	No	CWP1	Cell wall mannoprotein that localizes to birth scars of daughter cells; linked to a beta-1,3- and beta-1,6-glucan heteropolymer through a phosphodiester bond; required for propionic acid resistance Cwp1p
YPL004C	-1.20807	2.65123e-12	6.25435e-11	132.603	94.867	268.821	255.007	No	LSP1	Eisosome core component; eisosomes are large immobile patch structures at the cell cortex associated with endocytosis; phosphorylated on Thr233 upon Pkc1p hyperactivation in a Slt2p MAPK-dependent fashion; null mutants show activation of Pkc1p/Ypk1p stress resistance pathways; member of the BAR domain family lipid-binding protein LSP1
YDL204W	-1.22072	1.7778e-18	9.40794e-17	40.971	37.868	92.864	90.002	No	RTN2	Reticulon protein; involved in nuclear pore assembly and maintenance of tubular ER morphology; promotes membrane curvature; regulates the ER asymmetry-induced inheritance block during ER stress; role in ER-derived peroxisomal biogenesis; interacts with Sec6p, Yip3p, and Sbh1p; less abundant than RTN1; member of RTNLA (reticulon-like A) subfamily; protein increases in abundance and relocalizes to …
YOR192C-C	-1.22344	3.98764e-05	0.000260537	25.728	12.821	49.127	40.294	No	YOR192C-C	hypothetical protein; identified by expression profiling and mass spectrometry hypothetical protein
snR82	-1.22733	2.17524e-12	5.21525e-11	137.882	97.425	279.034	270.076	No	snR82	- -
YIR032C	-1.22829	1.95983e-07	2.16598e-06	17.254	11.511	34.331	32.488	No	DAL3	Ureidoglycolate lyase; converts ureidoglycolate to glyoxylate and urea in the third step of allantoin degradation; expression is sensitive to nitrogen catabolite repression; this enzyme is sometimes referred to 'ureidoglycolate hydrolase' but should not be confused with the Arabidopsis thaliana ureidoglycolate hydrolase enzyme which converts ureidoglycolate to glyoxylate, ammonia and carbon dioxi…
YOR136W	-1.22921	3.82647e-26	3.74611e-24	82.186	85.907	192.35	200.66	No	IDH2	Subunit of mitochondrial NAD(+)-dependent isocitrate dehydrogenase; complex catalyzes the oxidation of isocitrate to alpha-ketoglutarate in the TCA cycle; phosphorylated isocitrate dehydrogenase (NAD(+)) IDH2
YDR074W	-1.2437	5.19577e-12	1.17384e-10	51.374	37.563	101.141	108.48	No	TPS2	Phosphatase subunit of the trehalose-6-P synthase/phosphatase complex; involved in synthesis of the storage carbohydrate trehalose; expression is induced by stress conditions and repressed by the Ras-cAMP pathway; protein abundance increases in response to DNA replication stress trehalose-phosphatase TPS2
YGL006W	-1.24538	1.09783e-16	4.33207e-15	32.449	36.185	85.292	77.093	No	PMC1	Vacuolar Ca2+ ATPase involved in depleting cytosol of Ca2+ ions; prevents growth inhibition by activation of calcineurin in the presence of elevated concentrations of calcium; similar to mammalian PMCA1a calcium-transporting ATPase PMC1
YDR119W-A	-1.25713	3.7475e-15	1.27981e-13	57.155	65.313	162.366	129.436	No	COX26	Stabilizes or regulates formation of respiratory chain supercomplexes composed of Complex III (ubiquinol-cytochrome c reductase) and Complex IV (cytochrome c oxidase) Cox26p
YKL043W	-1.25718	1.7873e-19	1.02927e-17	39.966	44.621	103.917	97.903	Yes	PHD1	Transcriptional activator that enhances pseudohyphal growth; physically interacts with the Tup1-Cyc8 complex and recruits Tup1p to its targets; regulates expression of FLO11, an adhesin required for pseudohyphal filament formation; similar to StuA, an A. nidulans developmental regulator; potential Cdc28p substrate; PHD1 has a paralog, SOK2, that arose from the whole genome duplication Phd1p
YER053C	-1.25909	9.53622e-10	1.59136e-08	82.307	53.444	173.164	150.529	No	PIC2	Mitochondrial copper and phosphate carrier; imports copper and inorganic phosphate into mitochondria; functionally redundant with Mir1p but less abundant than Mir1p under normal conditions; expression is induced at high temperature Cu/Pi carrier
YAR035W	-1.26154	3.77087e-06	3.18706e-05	6.13	5.253	13.693	13.494	No	YAT1	Outer mitochondrial carnitine acetyltransferase; minor ethanol-inducible enzyme involved in transport of activated acyl groups from the cytoplasm into the mitochondrial matrix; phosphorylated carnitine O-acetyltransferase YAT1
YIL136W	-1.26367	5.89086e-25	5.32352e-23	89.337	88.662	224.202	201.813	No	OM45	Mitochondrial outer membrane hypothetical protein; major constituent of the outer membrane, extending into the intermembrane space; interacts with porin (Por1p) and with Om14p; imported via the presequence pathway involving the TOM and TIM23 complexes, then assembled in the outer membrane by Mim1p; protein abundance increases in response to DNA replication stress Om45p
snR49	-1.26975	2.85647e-07	3.04518e-06	15.227	12.204	38.898	26.885	No	snR49	- -
YNR001C	-1.27269	2.14601e-23	1.75078e-21	120.092	111.654	297.107	260.911	No	CIT1	Citrate synthase; catalyzes the condensation of acetyl coenzyme A and oxaloacetate to form citrate; the rate-limiting enzyme of the TCA cycle; nuclear encoded mitochondrial protein; CIT1 has a paralog, CIT2, that arose from the whole genome duplication citrate (Si)-synthase CIT1
YHR087W	-1.27476	5.63812e-26	5.42924e-24	86.426	97.151	223.005	220.135	No	RTC3	hypothetical protein involved in RNA metabolism; has structural similarity to SBDS, the human protein mutated in Shwachman-Diamond Syndrome (the yeast SBDS ortholog %3D SDO1); null mutation suppresses cdc13-1 temperature sensitivity; protein abundance increases in response to DNA replication stress Rtc3p
YLR149C	-1.2793	4.90571e-13	1.25288e-11	16.411	15.957	40.154	38.099	No	YLR149C	hypothetical protein; overexpression causes a cell cycle delay or arrest; null mutation results in a decrease in plasma membrane electron transport; YLR149C is not an essential gene; protein abundance increases in response to DNA replication stress hypothetical protein
YDR366C	-1.28849	2.25505e-14	6.89906e-13	29.547	24.453	68.058	63.108	No	YDR366C	hypothetical protein
YPR149W	-1.29179	1.3693e-18	7.37914e-17	206.381	162.571	435.279	465.426	No	NCE102	hypothetical protein; contains transmembrane domains; involved in secretion of proteins that lack classical secretory signal sequences; component of the detergent-insoluble glycolipid-enriched complexes (DIGs); NCE102 has a paralog, FHN1, that arose from the whole genome duplication Nce102p
YCL040W	-1.30466	3.26016e-17	1.41853e-15	205.886	155.924	451.111	440.064	No	GLK1	Glucokinase; catalyzes the phosphorylation of glucose at C6 in the first irreversible step of glucose metabolism; one of three glucose phosphorylating enzymes; expression regulated by non-fermentable carbon sources; GLK1 has a paralog, EMI2, that arose from the whole genome duplication glucokinase
YHL021C	-1.30828	1.71902e-21	1.18794e-19	64.769	55.812	150.693	146.691	No	AIM17	hypothetical protein; the authentic, non-tagged protein is detected in highly purified mitochondria in high-throughput studies; null mutant displays reduced frequency of mitochondrial genome loss Aim17p
YOR348C	-1.31686	0.000601132	0.0026791	2.87	2.406	6.061	6.937	No	PUT4	Proline permease; required for high-affinity transport of proline; also transports the toxic proline analog azetidine-2-carboxylate (AzC); PUT4 transcription is repressed in ammonia-grown cells proline permease PUT4
YBR126C	-1.31989	1.11244e-23	9.33499e-22	128.273	108.327	295.52	293.175	No	TPS1	Synthase subunit of trehalose-6-P synthase/phosphatase complex; synthesizes the storage carbohydrate trehalose, which is critically important for survival of long-term desiccation; also found in a monomeric form; expression is induced by the stress response and repressed by the Ras-cAMP pathway; protein abundance increases in response to DNA replication stress and in response to prolonged exposur…
YGR008C	-1.32017	1.61926e-34	2.43885e-32	361.987	340.04	901.297	846.418	No	STF2	Protein involved in resistance to desiccation stress; Stf2p exhibits antioxidant properties, and its overexpression prevents ROS accumulation and apoptosis; binds to F0 sector of mitochondrial F1F0 ATPase in vitro and may modulate the inhibitory action of Inh1p and Stf1p; protein abundance increases in response to DNA replication stress; STF2 has a paralog, TMA10, that arose from the whole genome…
YFR017C	-1.32242	2.43288e-14	7.40451e-13	86.256	63.577	197.758	175.556	No	IGD1	Cytoplasmic protein that inhibits Gdb1p glycogen debranching activity; required for normal intracellular accumulation of glycogen; phosphorylated in vivo; expression increases during wine fermentation; protein abundance increases in response to DNA replication stress; IGD1 has a paralog, YOL024W, that arose from the whole genome duplication Igd1p
YML100W	-1.32895	2.02687e-18	1.04437e-16	44.231	36.87	102.822	100.123	No	TSL1	Large subunit of trehalose 6-phosphate synthase/phosphatase complex; Tps1p-Tps2p complex converts uridine-5'-diphosphoglucose and glucose 6-phosphate to trehalose; contributes to survival to acute lethal heat stress; mutant has aneuploidy tolerance; protein abundance increases in response to DNA replication stress; TSL1 has a paralog, TPS3, that arose from the whole genome duplication trehalose 6…
snR81	-1.33611	0.000188083	0.00101544	8.165	6.532	12.114	24.889	No	snR81	- -
YDL210W	-1.33715	7.34515e-11	1.40083e-09	10.095	10.803	26.359	26.378	No	UGA4	GABA (gamma-aminobutyrate) permease; serves as a GABA transport protein involved in the utilization of GABA as a nitrogen source; catalyzes the transport of putrescine and delta-aminolevulinic acid (ALA); localized to the vacuolar membrane Uga4p
YBR140C	-1.34384	3.39429e-08	4.30627e-07	9.633	7.507	20.281	22.858	No	IRA1	GTPase-activating protein; negatively regulates RAS by converting it from GTP- to the GDP-bound inactive form, required for reducing cAMP levels under nutrient limiting conditions, mediates membrane association of adenylate cyclase; mutations cause catalase T deficiency, defective glycogen synthesis and defective trehalose accumulation; IRA1 has a paralog, IRA2, that arose from the whole genome d…
YMR250W	-1.34832	5.39121e-20	3.19878e-18	49.347	42.634	122.025	111.105	No	GAD1	Glutamate decarboxylase; converts glutamate into gamma-aminobutyric acid (GABA) during glutamate catabolism; involved in response to oxidative stress glutamate decarboxylase GAD1
YGR142W	-1.35228	1.38717e-30	1.6629e-28	182.939	209.095	511.572	486.554	No	BTN2	v-SNARE binding protein; facilitates specific protein retrieval from a late endosome to the Golgi; modulates arginine uptake, possible role in mediating pH homeostasis between the vacuole and plasma membrane H(+)-ATPase; contributes to prion curing; preferentially expressed after severe ethanol stress Btn2p
YJL172W	-1.35276	8.3224e-28	8.88832e-26	59.231	56.185	147.077	146.725	No	CPS1	Vacuolar carboxypeptidase S; expression is induced under low-nitrogen conditions Gly-Xaa carboxypeptidase
YDR032C	-1.3557	2.36868e-23	1.90597e-21	136.26	112.773	311.48	323.58	No	PST2	Protein with similarity to a family of flavodoxin-like proteins; induced by oxidative stress in a Yap1p dependent manner; the authentic, non-tagged protein is detected in highly purified mitochondria in high-throughput studies; protein abundance increases in response to DNA replication stress; PST2 has a paralog, RFS1, that arose from the whole genome duplication flavodoxin-like fold family prote…
YMR174C	-1.36476	7.04886e-24	6.00073e-22	148.471	184.405	435.517	419.452	No	PAI3	Cytoplasmic proteinase A (Pep4p) inhibitor; dependent on Pbs2p and Hog1p protein kinases for osmotic induction; intrinsically unstructured, N-terminal half becomes ordered in the active site of proteinase A upon contact Pai3p
YMR105C	-1.36936	6.84858e-14	1.93407e-12	50.75	37.609	122.059	105.115	No	PGM2	Phosphoglucomutase; catalyzes the conversion from glucose-1-phosphate to glucose-6-phosphate, which is a key step in hexose metabolism; functions as the acceptor for a Glc-phosphotransferase; protein abundance increases in response to DNA replication stress; PGM2 has a paralog, PGM1, that arose from the whole genome duplication phosphoglucomutase PGM2
YEL011W	-1.37316	1.59402e-14	4.95412e-13	37.079	31.221	98.085	78.023	No	GLC3	Glycogen branching enzyme, involved in glycogen accumulation; green fluorescent protein (GFP)-fusion protein localizes to the cytoplasm in a punctate pattern; relocalizes from nucleus to cytoplasmic foci upon DNA replication stress; glycogen accumulation defect of the null mutant is functionally complemented by human GBE1, which is associated with glycogen storage disease 1,4-alpha-glucan branchi…
YLL026W	-1.38605	2.65396e-31	3.31689e-29	172.042	158.125	449.863	410.321	No	HSP104	Disaggregase; heat shock protein that cooperates with Ydj1p (Hsp40) and Ssa1p (Hsp70) to refold and reactivate previously denatured, aggregated proteins; responsive to stresses including: heat, ethanol, and sodium arsenite; involved in [PSI+] propagation; protein becomes more abundant and forms cytoplasmic foci in response to DNA replication stress; potentiated Hsp104p variants decrease TDP-43 pr…
YDL222C	-1.41376	8.96162e-20	5.21193e-18	26.83	25.831	73.823	66.052	No	FMP45	Integral membrane protein localized to mitochondria; required for sporulation and maintaining sphingolipid content; similar to SUR7; FMP45 has a paralog, YNL194C, that arose from the whole genome duplication Fmp45p
YPR184W	-1.41576	1.32883e-11	2.80776e-10	9.787	11.739	29.534	27.91	No	GDB1	Glycogen debranching enzyme; contains glucanotranferase and alpha-1,6-amyloglucosidase activities; required for glycogen degradation; phosphorylated in mitochondria; activity is inhibited by Igd1p; protein abundance increases in response to DNA replication stress bifunctional 4-alpha-glucanotransferase/amylo-alpha-1,6-glucosidase
snR10	-1.41754	3.55109e-10	6.24524e-09	57.058	42.877	161.237	104.676	No	snR10	- -
YDR457W	-1.44669	4.52668e-10	7.82117e-09	9.641	7.803	22.48	24.682	No	TOM1	E3 ubiquitin ligase of the hect-domain class; has a role in mRNA export from the nucleus and may regulate transcriptional coactivators; involved in degradation of excess histones; interacts with Dia2p and is required for Dia2p degradation; required to target Cdc6p for ubiquitin-mediated destruction during G1 phase E3 ubiquitin-protein ligase TOM1
YPR194C	-1.4552	7.66317e-12	1.67336e-10	14.344	11.344	32.387	37.48	No	OPT2	Oligopeptide transporter; localized to peroxisomes and affects glutathione redox homeostasis; also localizes to the plasma membrane (PM) and to the late Golgi, and has a role in maintenance of lipid asymmetry between the inner and outer leaflets of the PM; member of the OPT family, with potential orthologs in S. pombe and C. albicans; also plays a role in formation of mature vacuoles and in polar…
YLR109W	-1.46025	2.23337e-36	3.54563e-34	1375.62	1199.39	3482.71	3583.89	No	AHP1	Thiol-specific peroxiredoxin; reduces hydroperoxides to protect against oxidative damage; function in vivo requires covalent conjugation to Urm1p thioredoxin peroxidase AHP1
YJR047C	-1.46206	4.9849e-20	2.98789e-18	51.65	68.625	163.503	167.191	No	ANB1	Translation elongation factor eIF-5A; previously thought to function in translation initiation; undergoes an essential hypusination modification; expressed under anaerobic conditions; ANB1 has a paralog, HYP2, that arose from the whole genome duplication; human EIF5A complements the inviability of the yeast hyp2 anb1 double null mutant translation elongation factor eIF-5A
YLL055W	-1.46292	4.0781e-13	1.06466e-11	13.2	11.328	35.341	31.86	No	YCT1	High-affinity cysteine-specific transporter; has similarity to the Dal5p family of transporters; green fluorescent protein (GFP)-fusion protein localizes to the endoplasmic reticulum; YCT1 is not an essential gene Yct1p
YDR171W	-1.46357	7.38651e-42	1.73553e-39	227.795	240.811	668.182	620.533	No	HSP42	Small heat shock protein (sHSP) with chaperone activity; forms barrel-shaped oligomers that suppress unfolded protein aggregation; involved in cytoskeleton reorganization after heat shock; protein abundance increases and forms cytoplasmic foci in response to DNA replication stress heat shock protein HSP42
YBR230W-A	-1.47572	0.000342566	0.00170096	81.651	45.724	179.327	174.247	No	YBR230W-A	hypothetical protein; YBR230W-A has a paralog, COQ8, that arose from the whole genome duplication hypothetical protein
YLL040C	-1.48282	1.00771e-07	1.1815e-06	6.065	4.713	15.484	14.407	No	VPS13	Protein involved in prospore membrane morphogenesis; peripheral membrane protein that localizes to the prospore membrane and at numerous membrane contact sites; involved in sporulation, vacuolar protein sorting, prospore membrane formation during sporulation, and protein-Golgi retention; required for mitochondrial integrity; contains a PH-like domain; homologous to human CHAC and COH1 which are i…
YBR054W	-1.48951	2.24359e-38	3.99358e-36	71.84	72.393	202.995	200.78	No	YRO2	Protein with a putative role in response to acid stress; null mutant is sensitive to acetic acid; transcription is regulated by Haa1p and induced in the presence of acetic acid; protein observed in plasma membrane foci in the presence of acetic acid; the authentic, non-tagged protein is detected in a phosphorylated state in highly purified mitochondria in high-throughput studies Yro2p
YER085C	-1.49282	0.000135542	0.000754667	2.368	2.177	6.511	6.179	No	YER085C	hypothetical protein
YBL015W	-1.53748	4.41149e-23	3.45508e-21	23.157	21.842	66.692	63.332	No	ACH1	Protein with CoA transferase activity; particularly for CoASH transfer from succinyl-CoA to acetate; has minor acetyl-CoA-hydrolase activity; phosphorylated; required for acetate utilization and for diploid pseudohyphal growth acetyl-CoA hydrolase
YGR209C	-1.54627	4.66025e-20	2.82209e-18	182.818	130.892	463.65	449.901	No	TRX2	Cytoplasmic thioredoxin isoenzyme; part of thioredoxin system which protects cells against oxidative and reductive stress; forms LMA1 complex with Pbi2p; acts as a cofactor for Tsa1p; required for ER-Golgi transport and vacuole inheritance; with Trx1p, facilitates mitochondrial import of small Tims Tim9p, Tim10p, Tim13p by maintaining them in reduced form; abundance increases under DNA replicatio…
YHR126C	-1.54683	3.3582e-05	0.00022214	2.36	4.058	10.221	8.675	No	ANS1	Putative GPI protein; SWAT-GFP and mCherry fusion proteins localize to the vacuole; transcription dependent upon Azf1p Ans1p
YER103W	-1.54929	1.03872e-36	1.74327e-34	71.442	79.024	225.84	213.638	No	SSA4	Heat shock protein that is highly induced upon stress; plays a role in SRP-dependent cotranslational protein-membrane targeting and translocation; member of the HSP70 family; cytoplasmic protein that concentrates in nuclei upon starvation; SSA4 has a paralog, SSA3, that arose from the whole genome duplication Hsp70 family chaperone SSA4
YMR194C-B	-1.55124	7.10272e-15	2.38408e-13	28.395	20.129	74.256	67.162	No	CMC4	Protein that localizes to the mitochondrial intermembrane space; localizes via the Mia40p-Erv1p system; contains twin cysteine-x(9)-cysteine motifs Cmc4p
YOR374W	-1.57383	1.54108e-20	9.6301e-19	75.286	55.233	197.435	189.738	No	ALD4	Mitochondrial aldehyde dehydrogenase; required for growth on ethanol and conversion of acetaldehyde to acetate; phosphorylated; activity is K+ dependent; utilizes NADP+ or NAD+ equally as coenzymes; expression is glucose repressed; can substitute for cytosolic NADP-dependent aldehyde dehydrogenase when directed to the cytosol; human homolog ALDH2 can complement yeast ald4 mutant aldehyde dehydrog…
snR11	-1.58261	9.48762e-16	3.37759e-14	92.71	60.182	229.244	227.046	No	snR11	- -
YNL142W	-1.59445	2.36405e-27	2.43622e-25	38.401	33.764	103.798	113.239	No	MEP2	Ammonium permease involved in regulation of pseudohyphal growth; belongs to a ubiquitous family of cytoplasmic membrane proteins that transport only ammonium (NH4+); expression is under the nitrogen catabolite repression regulation ammonium permease MEP2
YDR516C	-1.60215	5.07548e-29	5.62517e-27	61.347	51.434	175.991	164.798	No	EMI2	Non-essential hypothetical protein; required for transcriptional induction of the early meiotic-specific transcription factor IME1; required for sporulation; expression regulated by glucose-repression transcription factors Mig1/2p; EMI2 has a paralog, GLK1, that arose from the whole genome duplication; protein abundance increases in response to DNA replication stress putative glucokinase
YMR195W	-1.60451	0.00171723	0.00661441	72.885	35.355	173.606	155.09	No	ICY1	hypothetical protein; required for viability in rich media of cells lacking mitochondrial DNA; mutants have an invasive growth defect with elongated morphology; induced by amino acid starvation; ICY1 has a paralog, ICY2, that arose from the whole genome duplication Icy1p
YGL255W	-1.60861	1.91017e-05	0.00013216	206.316	125.396	464.601	545.127	No	ZRT1	High-affinity zinc transporter of the plasma membrane; responsible for the majority of zinc uptake; transcription is induced under low-zinc conditions by the Zap1p transcription factor high-affinity Zn(2+) transporter ZRT1
YHR053C	-1.63654	1.61222e-55	6.31345e-53	2654.07	2919.3	8409.05	8865.98	No	CUP1-1	Metallothionein; binds copper and mediates resistance to high concentrations of copper and cadmium; locus is variably amplified in different strains, with two copies, CUP1-1 and CUP1-2, in the genomic sequence reference strain S288C; CUP1-1 has a paralog, CUP1-2, that arose from a segmental duplication metallothionein CUP1
YHR055C	-1.63654	1.61222e-55	6.31345e-53	2654.07	2919.3	8409.05	8865.98	No	CUP1-2	Metallothionein; binds copper and mediates resistance to high concentrations of copper and cadmium; locus is variably amplified in different strains, with two copies, CUP1-1 and CUP1-2, in the genomic sequence reference strain S288C; CUP1-2 has a paralog, CUP1-1, that arose from a segmental duplication metallothionein CUP1
YHR092C	-1.64328	0.00944343	0.0277631	100.997	39.741	219.117	219.954	No	HXT4	High-affinity glucose transporter; member of the major facilitator superfamily, expression is induced by low levels of glucose and repressed by high levels of glucose; HXT4 has a paralog, HXT7, that arose from the whole genome duplication hexose transporter HXT4
YJL052W	-1.64392	2.76419e-22	2.0553e-20	280.409	202.608	797.168	708.393	No	TDH1	Glyceraldehyde-3-phosphate dehydrogenase (GAPDH), isozyme 1; involved in glycolysis and gluconeogenesis; tetramer that catalyzes the reaction of glyceraldehyde-3-phosphate to 1,3 bis-phosphoglycerate; detected in the cytoplasm and cell wall; protein abundance increases in response to DNA replication stress; GAPDH-derived antimicrobial peptides secreted by S. cerevisiae are active against a wide v…
YLR035C-A	-1.65829	1.02074e-14	3.35879e-13	13.33	9.966	35.553	37.48	No	YLR035C-A	Retrotransposon TYA Gag and TYB Pol genes; polyprotein is processed to make a nucleocapsid-like protein (Gag), reverse transcriptase (RT), protease (PR), and integrase (IN); YLR035C-A is part of a mutant retrotransposon gag-pol fusion protein
YEL039C	-1.66346	3.55382e-15	1.22077e-13	18.073	25.626	76.955	61.387	No	CYC7	Cytochrome c isoform 2, expressed under hypoxic conditions; also known as iso-2-cytochrome c; electron carrier of the mitochondrial intermembrane space that transfers electrons from ubiquinone-cytochrome c oxidoreductase to cytochrome c oxidase during cellular respiration; protein abundance increases in response to DNA replication stress; CYC7 has a paralog, CYC1, that arose from the whole genome…
YOL081W	-1.6695	1.96958e-12	4.78071e-11	8.627	6.844	23.167	25.792	No	IRA2	GTPase-activating protein; negatively regulates RAS by converting it from the GTP- to the GDP-bound inactive form, required for reducing cAMP levels under nutrient limiting conditions; IRA2 has a paralog, IRA1, that arose from the whole genome duplication; defects in human homolog NF1 are associated with neurofibromatosis Ras GTPase activating protein IRA2
YNL160W	-1.67674	2.68997e-38	4.64732e-36	223.521	187.367	639.641	670.139	No	YGP1	Cell wall-related secretory glycoprotein; induced by nutrient deprivation-associated growth arrest and upon entry into stationary phase; may be involved in adaptation prior to stationary phase entry; YGP1 has a paralog, SPS100, that arose from the whole genome duplication Ygp1p
YER067W	-1.69385	5.71197e-21	3.68705e-19	242.462	173.328	735.884	605.731	No	RGI1	hypothetical protein; involved in energy metabolism under respiratory conditions; protein abundance is increased upon intracellular iron depletion or in response to DNA replication stress; RGI1 has a paralog, RGI2, that arose from the whole genome duplication Rgi1p
YDL007C-A	-1.70764	0.00133644	0.00531859	0.835	1.987	4.618	4.699	No	YDL007C-A	hypothetical protein
YGR243W	-1.71092	1.79481e-23	1.48489e-21	29.62	24.469	94.749	81.302	No	MPC3	Highly conserved subunit of the mitochondrial pyruvate carrier (MPC); expressed during growth on nonfermentable carbon sources, and heterodimerizes with Mpc1p to form the respiratory isoform of MPC; MPC localizes to the mitochondrial inner membrane and mediates pyruvate uptake; MPC3 paralog, MPC2, heterodimerizes with Mpc1p to form the fermentative MPC isoform; protein abundance increases in resp…
YKL065W-A	-1.72119	1.01954e-12	2.53762e-11	11.044	8.808	37.124	27.737	No	YKL065W-A	hypothetical protein; SWAT-GFP fusion protein localizes to the endoplasmic reticulum (ER) while mCherry fusion localizes to both the ER and vacuole hypothetical protein
snR17a	-1.76372	6.64887e-18	3.22772e-16	52.793	45.991	132.866	201.615	No	snR17a	- -
YMR251W-A	-1.7904	1.43584e-06	1.35163e-05	182.818	112.324	466.383	552.821	No	HOR7	hypothetical protein; overexpression suppresses Ca2+ sensitivity of mutants lacking inositol phosphorylceramide mannosyltransferases Csg1p and Csh1p; transcription is induced under hyperosmotic stress and repressed by alpha factor; HOR7 has a paralog, DDR2, that arose from the whole genome duplication Hor7p
YLL057C	-1.79141	2.50297e-32	3.58597e-30	39.633	49.211	160.473	146.768	No	JLP1	Fe(II)-dependent sulfonate/alpha-ketoglutarate dioxygenase; involved in sulfonate catabolism for use as a sulfur source; contains sequence that resembles a J domain (typified by the E. coli DnaJ protein); induced by sulphur starvation sulfonate dioxygenase
YAL062W	-1.79701	4.4459e-46	1.24358e-43	61.112	54.936	200.618	201.004	No	GDH3	NADP(+)-dependent glutamate dehydrogenase; synthesizes glutamate from ammonia and alpha-ketoglutarate; rate of alpha-ketoglutarate utilization differs from Gdh1p; expression regulated by nitrogen and carbon sources; GDH3 has a paralog, GDH1, that arose from the whole genome duplication glutamate dehydrogenase (NADP(+)) GDH3
YCL025C	-1.80245	3.35711e-21	2.24087e-19	58.647	39.573	172.196	168.869	No	AGP1	Low-affinity amino acid permease with broad substrate range; involved in uptake of asparagine, glutamine, and other amino acids; expression regulated by SPS plasma membrane amino acid sensor system (Ssy1p-Ptr3p-Ssy5p); AGP1 has a paralog, GNP1, that arose from the whole genome duplication amino acid transporter AGP1
YAL061W	-1.82271	1.257e-36	2.05101e-34	27.447	28.237	102.763	93.608	No	BDH2	Putative medium-chain alcohol dehydrogenase with similarity to BDH1; transcription induced by constitutively active PDR1 and PDR3 putative dehydrogenase BDH2
YJR005C-A	-1.83217	1.06533e-16	4.28612e-15	11.1	14.084	50.859	38.917	No	LSO1	Protein with a potential role in response to iron deprivation; transcription increases during iron deprivation and during treatment with 2-(6-benzyl-2-pyridyl)quinazoline (BPQ) and copper; regulated by Aft1p and, to a lesser extent, by Aft2p; originally identified as a syntenic homolog of an Ashbya gossypii gene; localizes to nucleus and cytoplasm, and nuclear localization is enhanced under iron-…
YKR034W	-1.86529	3.48364e-06	2.96994e-05	2.814	1.835	9.644	7.143	Yes	DAL80	Negative regulator of genes in multiple nitrogen degradation pathways; expression is regulated by nitrogen levels and by Gln3p; member of the GATA-binding family, forms homodimers and heterodimers with Gzf3p; DAL80 has a paralog, GZF3, that arose from the whole genome duplication Dal80p
YGR043C	-1.87072	1.73023e-34	2.54084e-32	30.828	37.822	130.387	120.571	No	NQM1	Transaldolase of unknown function; transcription is repressed by Mot1p and induced by alpha-factor and during diauxic shift; NQM1 has a paralog, TAL1, that arose from the whole genome duplication sedoheptulose-7-phosphate:D-glyceraldehyde-3-phosphate transaldolase NQM1
YGR248W	-1.87227	1.26343e-27	1.32525e-25	26.522	20.662	84.884	86.827	No	SOL4	6-phosphogluconolactonase; protein abundance increases in response to DNA replication stress; SOL4 has a paralog, SOL3, that arose from the whole genome duplication 6-phosphogluconolactonase SOL4
YFR053C	-1.90294	1.04034e-30	1.27312e-28	120.773	88.914	407.256	374.313	No	HXK1	Hexokinase isoenzyme 1; a cytosolic protein that catalyzes phosphorylation of glucose during glucose metabolism; expression is highest during growth on non-glucose carbon sources; glucose-induced repression involves hexokinase Hxk2p; HXK1 has a paralog, HXK2, that arose from the whole genome duplication hexokinase 1
YFR015C	-1.96053	5.9697e-20	3.5066e-18	27.341	19.025	100.437	78.909	No	GSY1	Glycogen synthase; expression induced by glucose limitation, nitrogen starvation, environmental stress, and entry into stationary phase; GSY1 has a paralog, GSY2, that arose from the whole genome duplication; relocalizes from nucleus to cytoplasmic foci upon DNA replication stress glycogen (starch) synthase GSY1
YNL195C	-2.06601	2.08168e-44	5.09492e-42	29.757	26.6	123.23	111.819	No	YNL195C	hypothetical protein; shares a promoter with YNL194C; the authentic, non-tagged protein is detected in highly purified mitochondria in high-throughput studies; YNL195C has a paralog, HBT1, that arose from the whole genome duplication hypothetical protein
RPR1	-2.08858	1.75654e-30	2.06358e-28	19.403	22.596	78.543	100.02	No	RPR1	- -
YLR012C	-2.10791	0.00255914	0.00929645	1.022	1.606	9.508	1.928	No	YLR012C	hypothetical protein; YLR012C is not an essential gene hypothetical protein
YCR005C	-2.11464	9.75399e-71	4.4073e-68	73.258	72.043	299.052	328.305	No	CIT2	Citrate synthase, peroxisomal isozyme involved in glyoxylate cycle; catalyzes condensation of acetyl coenzyme A and oxaloacetate to form citrate; expression is controlled by Rtg1p and Rtg2p transcription factors; SCF-Ucc1 regulates level of Cit2p to maintain citrate homeostasis; oxaloacetate-dependent positive feedback loop inhibits Cit2p ubiquitination; CIT2 has a paralog, CIT1, that arose from …
YOL052C-A	-2.24686	4.28954e-07	4.39734e-06	55.85	29.828	207.979	197.647	No	DDR2	Multi-stress response protein; expression is activated by a variety of xenobiotic agents and environmental or physiological stresses; DDR2 has a paralog, HOR7, that arose from the whole genome duplication Ddr2p
LSR1	-2.25401	9.18618e-25	8.1757e-23	8.53	9.014	47.2	36.283	No	LSR1	- -
YDR070C	-2.27721	8.31645e-28	8.88832e-26	29.587	48.085	197.724	178.301	No	FMP16	hypothetical protein; may be involved in responding to conditions of stress; the authentic, non-tagged protein is detected in highly purified mitochondria in high-throughput studies; protein abundance increases in response to DNA replication stress Fmp16p
YEL033W	-2.31782	1.00138e-15	3.54345e-14	8.352	5.2	27.599	39.14	No	MTC7	hypothetical protein; predicted metabolic role based on network analysis derived from ChIP experiments, a large-scale deletion study and localization of transcription factor binding sites; null mutant is sensitive to temperature oscillation in a cdc13-1 mutant Mtc7p
YER150W	-2.34341	3.51018e-107	2.29098e-104	268.685	269.459	1423.12	1299.76	No	SPI1	GPI-anchored cell wall protein involved in weak acid resistance; basal expression requires Msn2p/Msn4p; expression is induced under conditions of stress and during the diauxic shift; SPI1 has a paralog, SED1, that arose from the whole genome duplication Spi1p
YGR294W	-2.38663	7.97493e-39	1.61533e-36	12.892	10.773	58.389	64.15	No	PAU12	hypothetical protein; member of the seripauperin multigene family encoded mainly in subtelomeric regions; SWAT-GFP fusion protein localizes to both the endoplasmic reticulum and vacuole seripauperin PAU12
YJL133C-A	-2.40039	7.72581e-52	2.83634e-49	196.642	149.674	850.226	972.996	No	YJL133C-A	hypothetical protein; the authentic, non-tagged protein is detected in highly purified mitochondria in high-throughput studies hypothetical protein
snR17b	-2.46524	1.28349e-21	9.08338e-20	6.608	8.382	33.337	49.709	No	snR17b	- -
YPR160W	-2.48117	4.15294e-36	6.41956e-34	23.66	16.756	121.83	102.137	No	GPH1	Glycogen phosphorylase required for the mobilization of glycogen; non-essential; regulated by cyclic AMP-mediated phosphorylation; phosphorylation by Cdc28p may coordinately regulate carbohydrate metabolism and the cell cycle; expression is regulated by stress-response elements and by the HOG MAP kinase pathway glycogen phosphorylase
YOR382W	-2.48174	8.39462e-109	6.16375e-106	187.204	198.802	1129.9	1019.92	No	FIT2	Mannoprotein that is incorporated into the cell wall; incorporated via a glycosylphosphatidylinositol (GPI) anchor; involved in the retention of siderophore-iron in the cell wall Fit2p
YOR383C	-2.48392	1.69958e-104	9.98332e-102	321.405	364.311	1985.11	1839.7	No	FIT3	Mannoprotein that is incorporated into the cell wall; incorporated via a glycosylphosphatidylinositol (GPI) anchor; involved in the retention of siderophore-iron in the cell wall Fit3p
YIL057C	-2.54102	5.68034e-21	3.68705e-19	3.795	3.845	24.568	19.751	No	RGI2	hypothetical protein; involved in energy metabolism under respiratory conditions; expression induced under carbon limitation and repressed under high glucose; RGI2 has a paralog, RGI1, that arose from the whole genome duplication Rgi2p
YLR461W	-2.58468	7.04284e-05	0.000426491	0.632	0.442	3.234	2.986	No	PAU4	Member of the seripauperin multigene family; encoded mainly in subtelomeric regions; SWAT-GFP fusion protein localizes to the endoplasmic reticulum and vacuole, while mCherry fusion localizes to just the vacuole; active during alcoholic fermentation; regulated by anaerobiosis; negatively regulated by oxygen; repressed by heme seripauperin PAU4
snR19	-2.61886	1.68998e-48	4.96347e-46	17.919	21.774	135.523	108.058	No	snR19	- -
RDN25-1	-2.63894	9.78462e-39	1.85403e-36	225.443	219.852	1050.04	1716.16	No	RDN25-1	- -
RDN25-2	-2.63894	9.78462e-39	1.85403e-36	225.443	219.852	1050.04	1716.16	No	RDN25-2	- -
YFL014W	-2.64757	2.88058e-145	3.38411e-142	311.918	327.692	2065.59	1930.48	No	HSP12	Plasma membrane protein involved in maintaining membrane organization; involved in maintaining organization during stress conditions; induced by heat shock, oxidative stress, osmostress, stationary phase, glucose depletion, oleate and alcohol; protein abundance increased in response to DNA replication stress and dietary restriction; regulated by the HOG and Ras-Pka pathways; required for dietary …
YGR087C	-2.83776	1.32245e-50	4.56946e-48	8.165	10.339	69.833	62.824	No	PDC6	Minor isoform of pyruvate decarboxylase; decarboxylates pyruvate to acetaldehyde, involved in amino acid catabolism; transcription is glucose- and ethanol-dependent, and is strongly induced during sulfur limitation indolepyruvate decarboxylase 6
YGR236C	-2.8408	1.24539e-80	6.0962e-78	41.563	52.234	356.779	314.639	No	SPG1	Protein required for high temperature survival during stationary phase; not required for growth on nonfermentable carbon sources; the authentic, non-tagged protein is detected in highly purified mitochondria in high-throughput studies Spg1p
YBR072W	-2.86411	1.14916e-132	9.9852e-130	277.701	325.476	2220.22	2158.87	No	HSP26	Small heat shock protein (sHSP) with chaperone activity; forms hollow, sphere-shaped oligomers that suppress unfolded proteins aggregation; long-lived protein that is preferentially retained in mother cells and forms cytoplasmic foci; oligomer activation requires heat-induced conformational change; also has mRNA binding activity chaperone protein HSP26
RDN37-1	-2.9306	7.35442e-49	2.27368e-46	38.92	34.861	222.979	337.367	No	RDN37-1	- -
RDN37-2	-2.9306	7.35442e-49	2.27368e-46	38.92	34.861	222.979	337.367	No	RDN37-2	- -
YDR343C	-2.93727	3.11681e-45	7.96007e-43	91.186	55.553	583.476	536.572	No	HXT6	High-affinity glucose transporter; member of the major facilitator superfamily, nearly identical to Hxt7p, expressed at high basal levels relative to other HXTs, repression of expression by high glucose requires SNF3; HXT6 has a paralog, HXT1, that arose from the whole genome duplication hexose transporter HXT6
YCR021C	-2.94071	9.85093e-149	1.44661e-145	110.524	121.49	921.697	855.075	No	HSP30	Negative regulator of the H(+)-ATPase Pma1p; stress-responsive protein; hydrophobic plasma membrane localized; induced by heat shock, ethanol treatment, weak organic acid, glucose limitation, and entry into stationary phase Hsp30p
SCR1	-3.14426	1.74343e-40	3.79294e-38	17.83	16.475	112.44	189.454	No	SCR1	- -
snR190	-3.18658	5.29603e-95	2.82808e-92	43.639	34.944	380.642	330.939	No	snR190	- -
YNR034W-A	-3.19742	1.6323e-196	4.79407e-193	83.67	79.77	750.333	743.437	No	EGO4	hypothetical protein; expression is regulated by Msn2p/Msn4p; YNR034W-A has a paralog, YCR075W-A, that arose from the whole genome duplication Ego4p
YMR107W	-3.33696	1.18993e-132	9.9852e-130	45.763	55.873	490.009	535.789	No	SPG4	Protein required for high temperature survival during stationary phase; not required for growth on nonfermentable carbon sources Spg4p
YPL223C	-3.40772	5.87864e-179	1.15104e-175	52.161	59.786	602.823	583.811	No	GRE1	Hydrophilin essential in desiccation-rehydration process; stress induced (osmotic, ionic, oxidative, heat shock and heavy metals); regulated by the HOG pathway; GRE1 has a paralog, SIP18, that arose from the whole genome duplication Gre1p
snR189	-3.62045	1.31596e-09	2.11825e-08	12.373	6.608	83.39	149.428	No	snR189	- -
YCL048W-A	-3.70715	2.18591e-19	1.23462e-17	2.222	0.883	23.32	15.508	No	YCL048W-A	hypothetical protein; SWAT-GFP and mCherry fusion proteins localize to the cell periphery and vacuole; YCL048W-A has a paralog, YDR524C-B, that arose from the whole genome duplication hypothetical protein
YMR175W	-4.60102	6.83179e-297	4.01299e-293	43.242	51.998	1163.08	1145.54	No	SIP18	Phospholipid-binding hydrophilin; essential to overcome desiccation-rehydration process; expression is induced by osmotic stress; SIP18 has a paralog, GRE1, that arose from the whole genome duplication Sip18p
YPL038W-A	-8.02532	2.47725e-07	2.67981e-06	0	0	3.251	3.339	No	YPL038W-A	hypothetical protein; identified by fungal homology and RT-PCR hypothetical protein
YGR031C-A	-8.90758	3.39727e-09	5.26532e-08	0	0	5.764	6.412	No	NAG1	Protein involved in yeast cell wall biogenesis; localizes to the cell periphery; production of Nag1p is dependent upon the presence of Slt2p and Rlm1p; gene is nested within and antisense to IMO32 Nag1p
YCR096C	-10.9762	5.91351e-14	1.70274e-12	0	0	24.152	26.911	No	HMRA2	Silenced copy of a2 at HMR; similarity to Alpha2p; required along with a1p for inhibiting expression of the HO endonuclease in a/alpha HO/HO diploid cells with an active mating-type interconversion system homeodomain mating type protein a2
YPR133W-A	-14.8361	1.19684e-24	1.04929e-22	0	0	363.553	377.971	No	TOM5	Component of the TOM (translocase of outer membrane) complex; responsible for recognition and initial import of all mitochondrially directed proteins; involved in transfer of precursors from the Tom70p and Tom20p receptors to the Tom40p pore Tom5p

## Sheet: R238K vs. WT
Gene ID	log2(Fold_change)	p-value	FDR p-value correction	mRNA expression level at thermal stress				YEASTRACT 2019 TF	Gene	Gene Function
				Spt15 mutant strain R238K		Wild type strain BY4741
				Duplicate#1	Duplicate#2	Duplicate#1	Duplicate#2
YLR154W-C	14.3123	6.43396e-23	2.27381e-21	306.878	229.32	0	0	No	TAR1	Protein potentially involved in regulation of respiratory metabolism; located in the mitochondria; interacts genetically with RPO41 and physically with Coq5p; encoded within the 25S rRNA gene on the opposite strand Tar1p
ETS1-1	9.0781	0.000387476	0.00151651	12.13	2.087	0	0	No	ETS1-1	- -
ETS1-2	9.0781	0.000387476	0.00151651	12.13	2.087	0	0	No	ETS1-2	- -
YPR108W-A	8.64335	0.000232092	0.000961007	1.861	8.702	0	0	No	YPR108W-A	hypothetical protein; identified by fungal homology and RT-PCR hypothetical protein
YBL112C	8.53461	2.22464e-08	1.88628e-07	4.713	5.053	0	0	No	YBL112C	hypothetical protein; YBL112C is contained within TEL02L hypothetical protein
YBL008W-A	7.60611	2.34184e-06	1.44887e-05	3.172	1.974	0	0	No	YBL008W-A	hypothetical protein; identified by fungal homology and RT-PCR hypothetical protein
YGL235W	4.2688	1.7352e-05	9.10164e-05	2.879	2.573	0.289	0	No	YGL235W	hypothetical protein; potential Cdc28p substrate; null mutant displays increased resistance to antifungal agents gliotoxin, cycloheximide and H2O2 hypothetical protein
YGL149W	3.04083	2.57361e-07	1.8872e-06	6.391	4.248	0.9	0.456	No	YGL149W	hypothetical protein; conserved among S. cerevisiae strains; YGL149W is not an essential gene hypothetical protein
YHR218W	2.57219	0.00828527	0.0217586	1.788	1.619	0.102	0.551	No	YHR218W	Helicase-like protein encoded within the telomeric Y' element hypothetical protein
YMR321C	2.49941	6.52461e-08	5.17991e-07	9.04	6.381	1.783	1.059	No	YMR321C	hypothetical protein; proposed to be a palmitoylated membrane protein; YMR321C has a paralog, SAM4, that arose from a single-locus duplication hypothetical protein
YFL066C	2.48081	0.00294082	0.00899995	1.797	2.236	0.212	0.559	No	YFL066C	Helicase-like protein encoded within the telomeric Y' element; induced by treatment with 8-methoxypsoralen and UVA irradiation; SWAT-GFP and mCherry fusion proteins localize to the nucleus Y' element ATP-dependent helicase
YHL048W	2.3809	9.63928e-17	2.1474e-15	60.725	33.32	8.914	9.811	No	COS8	Endosomal protein involved in turnover of plasma membrane proteins; member of the DUP380 subfamily of conserved, often subtelomeric COS genes; required for the multivesicular vesicle body sorting pathway that internalizes plasma membrane proteins for degradation; Cos proteins provide ubiquitin in trans for nonubiquitinated cargo proteins Cos8p
YMR147W	2.291	2.81444e-25	1.26844e-23	62.925	98.136	17.615	16.42	No	YMR147W	hypothetical protein; SWAT-GFP and mCherry fusion proteins localize to the cell periphery hypothetical protein
YML100W	2.28273	2.49398e-124	4.87074e-121	469.76	484.137	102.822	100.123	No	TSL1	Large subunit of trehalose 6-phosphate synthase/phosphatase complex; Tps1p-Tps2p complex converts uridine-5'-diphosphoglucose and glucose 6-phosphate to trehalose; contributes to survival to acute lethal heat stress; mutant has aneuploidy tolerance; protein abundance increases in response to DNA replication stress; TSL1 has a paralog, TPS3, that arose from the whole genome duplication trehalose 6…
YDR077W	2.219	4.00781e-116	5.87045e-113	17110.1	19443.4	4046.25	4078.5	No	SED1	Major stress-induced structural GPI-cell wall glycoprotein; associates with translating ribosomes, possible role in mitochondrial genome maintenance; ORF contains two distinct variable minisatellites; SED1 has a paralog, SPI1, that arose from the whole genome duplication Sed1p
YKR073C	2.21559	0.0013828	0.00467503	4.401	2.611	1.188	0.404	No	YKR073C	hypothetical protein; conserved across S. cerevisiae strains hypothetical protein
YMR039C	2.11877	1.39847e-53	4.55203e-51	333.935	427.5	91.752	89.615	No	SUB1	Transcriptional regulator; facilitates elongation through factors that modify RNAP II; role in peroxide resistance involving Rad2p; role in nonhomologous end-joining (NHEJ) of ds breaks in plasmid DNA, but not chromosomal DNA; role in the hyperosmotic stress response through polymerase recruitment at RNAP II and RNAP III genes; negatively regulates sporulation; protein abundance increases in resp…
YML053C	2.1045	5.41204e-78	4.52988e-75	229.035	246.864	58.788	55.733	No	YML053C	hypothetical protein; green fluorescent protein (GFP)-fusion protein localizes to the cytoplasm and the nucleus; overexpression causes a cell cycle delay or arrest; YML053C is not an essential gene hypothetical protein
YMR011W	2.10446	1.94e-37	1.89441e-35	941.602	668.057	181.178	206.512	No	HXT2	High-affinity glucose transporter of the major facilitator superfamily; expression is induced by low levels of glucose and repressed by high levels of glucose hexose transporter HXT2
YLR331C	2.05667	1.69746e-06	1.0694e-05	8.16	8.206	2.708	1.334	No	JIP3	hypothetical protein; conserved among S. cerevisiae strains; not conserved in closely related Saccharomyces species; 98% of ORF overlaps the verified gene MID2 Jip3p
YMR014W	2.05076	8.84437e-53	2.46758e-50	127.886	136.003	35.171	30.715	No	BUD22	Protein required for rRNA maturation and ribosomal subunit biogenesis; required for 18S rRNA maturation; also required for small ribosomal subunit biogenesis; cosediments with pre-ribosomal particles; mutation decreases efficiency of +1 Ty1 frameshifting and transposition, and affects budding pattern Bud22p
YMR031C	2.04821	1.74443e-48	3.65022e-46	158.207	191.228	42.03	45.432	No	EIS1	Component of the eisosome required for proper eisosome assembly; similar to Uso1p; authentic, non-tagged protein is detected in a phosphorylated state in highly purified mitochondria in high-throughput studies; protein increases in abundance and relocalizes from plasma membrane to cytoplasm upon DNA replication stress; EIS1 has a paralog, YKL050C, that arose from the whole genome duplication Eis1p
YMR117C	1.94254	7.6633e-33	5.68345e-31	59.478	67.258	16.885	17.212	No	SPC24	Component of the kinetochore-associated Ndc80 complex; involved in chromosome segregation, spindle checkpoint activity, and kinetochore clustering; evolutionarily conserved; other members include Ndc80p, Nuf2p, Spc24p, and Spc25p kinetochore-associated Ndc80 complex subunit SPC24
YMR215W	1.91998	1.03714e-46	1.96019e-44	231.731	194.596	57.005	59.675	No	GAS3	Putative 1,3-beta-glucanosyltransferase; has similarity go other GAS family members; low abundance, possibly inactive member of the GAS family of GPI-containing proteins; localizes to the cell wall; mRNA induced during sporulation putative 1,3-beta-glucanosyltransferase
YML093W	1.91401	1.58933e-49	3.58149e-47	116.718	114.791	30.816	32.815	No	UTP14	Subunit of U3-containing Small Subunit (SSU) processome complex; involved in production of 18S rRNA and assembly of small ribosomal subunit Utp14p
YMR001C-A	1.86194	0.00206242	0.00658874	2.494	5.829	1.188	1.213	No	YMR001C-A	hypothetical protein
YML130C	1.84599	2.66271e-07	1.94038e-06	487.832	295.866	114.41	111.5	No	ERO1	Thiol oxidase required for oxidative protein folding in the ER; essential for maintaining ER redox balance; feedback regulated via reduction and oxidation of regulatory bonds; reduced Pdi1p activates Ero1p by direct reduction of Ero1p regulatory bonds; depletion of thiol substrates and accumulation of oxidized Pdi1p results in inactivation of Ero1p by both Pdi1p-mediated oxidation and autonomous …
YMR244C-A	1.81963	5.79196e-32	3.85626e-30	382.373	513.986	121.728	140.959	No	COA6	Protein involved in cytochrome c oxidase (Complex IV) assembly; involved in delivery of copper to Complex IV; also required for efficient formation of respiratory supercomplexes comprised of Complexes III and IV; localizes to the mitochondrial intermembrane space; ortholog implicated in cardiac defects in zebrafish and human; transcription is induced in response to the DNA-damaging agent MMS; pro…
YML133C	1.79182	3.23297e-15	6.314e-14	26.149	23.739	7.122	7.806	No	YML133C	Putative Y' element ATP-dependent helicase; the authentic, non-tagged protein is detected in highly purified mitochondria in high-throughput studies; YML133C contains an intron Y' element ATP-dependent helicase
YML058W	1.78259	2.10005e-61	9.46478e-59	2602.89	2302.15	705.441	770.65	No	SML1	Ribonucleotide reductase inhibitor; involved in regulating dNTP production; regulated by Mec1p and Rad53p during DNA damage and S phase; SML1 has a paralog, DIF1, that arose from the whole genome duplication ribonucleotide reductase inhibiting protein SML1
YHL049C	1.72609	0.00407718	0.0119143	2.833	3.602	0.764	1.3	No	YHL049C	hypothetical protein
YFL058W	1.70145	0.0141712	0.0342387	8.784	1.881	2.063	1.317	No	THI5	Protein involved in synthesis of the thiamine precursor HMP; member of a subtelomeric gene family including THI5, THI11, THI12, and THI13; hydroxymethylpyrimidine is also known as HMP 4-amino-5-hydroxymethyl-2-methylpyrimidine phosphate synthase
YMR297W	1.70031	1.95167e-46	3.57339e-44	501.081	604.748	177.85	174.256	No	PRC1	Vacuolar carboxypeptidase Y (proteinase C, CPY); broad-specificity C-terminal exopeptidase involved in non-specific protein degradation in the vacuole; member of the serine carboxypeptidase family carboxypeptidase C PRC1
YMR173W	1.66927	1.26051e-58	5.27523e-56	666.347	732.845	237.53	217.829	No	DDR48	DNA damage-responsive protein; expression is increased in response to heat-shock stress or treatments that produce DNA lesions; contains multiple repeats of the amino acid sequence NNNDSYGS; protein abundance increases in response to DNA replication stress DNA damage-responsive protein 48
YMR260C	1.66567	2.6831e-79	2.62005e-76	1665.03	1678.01	529.425	561.246	No	TIF11	Translation initiation factor eIF1A; essential protein that forms a complex with Sui1p (eIF1) and the 40S ribosomal subunit and scans for the start codon; C-terminus associates with Fun12p (eIF5B); N terminus interacts with eIF2 and eIF3 Tif11p
YMR043W	1.66078	1.08459e-66	6.35459e-64	386.242	394.254	129.843	125.658	Yes	MCM1	Transcription factor; involved in cell-type-specific transcription and pheromone response; plays a central role in the formation of both repressor and activator complexes; relocalizes to the cytosol in response to hypoxia transcription factor MCM1
YML052W	1.65839	3.08416e-58	1.12938e-55	370.096	349.566	115.199	120.804	No	SUR7	Plasma membrane protein, component of eisosomes; long-lived protein that remains stable in eisosomes of mother cells while other eisosome proteins, Pil1p and Lsp1p, turn over; may function to anchor the eisosome in place; sporulation and plasma membrane sphingolipid content are altered in mutants; localizes to furrow-like invaginations (MCC patches) Sur7p
YMR311C	1.64529	8.68371e-53	2.46758e-50	424.348	483.099	149.751	150.426	No	GLC8	Regulatory subunit of protein phosphatase 1 (Glc7p); involved in glycogen metabolism and chromosome segregation; proposed to regulate Glc7p activity via conformational alteration; ortholog of the mammalian protein phosphatase inhibitor 2; protein abundance increases in response to DNA replication stress Glc8p
YMR309C	1.64452	3.00725e-39	3.52389e-37	153.943	153.435	47.565	54.236	No	NIP1	eIF3c subunit of the eukaryotic translation initiation factor 3 (eIF3); involved in the assembly of preinitiation complex and start codon selection; eIF3 is also involved in programmed stop codon readthrough translation initiation factor eIF3 core subunit c
YML129C	1.6445	3.07405e-46	5.45783e-44	646.231	753.87	220.942	242.485	No	COX14	Mitochondrial cytochrome c oxidase (complex IV) assembly factor; also involved in translational regulation of Cox1p and prevention of Cox1p aggregation before assembly; associates with complex IV assembly intermediates and complex III/complex IV supercomplexes; located in the mitochondrial membrane Cox14p
YMR159C	1.63637	3.15566e-19	8.52028e-18	44.047	41.826	13.209	15.37	No	ATG16	Conserved protein involved in autophagy; interacts with Atg12p-Atg5p conjugates to form Atg12p-Atg5p-Atg16p multimers, which binds to membranes and localizes to the pre-autophagosomal structure and are required for autophagy; relocalizes from nucleus to cytoplasmic foci upon DNA replication stress Atg16p
YML026C	1.60684	1.49328e-65	7.95374e-63	5342.82	5321.27	1720.94	1903.07	No	RPS18B	Protein component of the small (40S) ribosomal subunit; homologous to mammalian ribosomal protein S18 and bacterial S13; RPS18B has a paralog, RPS18A, that arose from the whole genome duplication; protein abundance increases in response to DNA replication stress ribosomal 40S subunit protein S18B
YNL332W	1.60618	0.00897525	0.0232681	8.995	2.545	2.131	1.764	No	THI12	Protein involved in synthesis of the thiamine precursor HMP; member of a subtelomeric gene family including THI5, THI11, THI12, and THI13; hydroxymethylpyrimidine is also known as HMP 4-amino-5-hydroxymethyl-2-methylpyrimidine phosphate synthase
YMR045C	1.59899	6.40066e-45	1.01355e-42	158.344	164.392	54.739	55.526	No	YMR045C	Retrotransposon TYA Gag and TYB Pol genes; transcribed/translated as one unit; polyprotein is processed to make a nucleocapsid-like protein (Gag), reverse transcriptase (RT), protease (PR), and integrase (IN); similar to retroviral genes gag-pol fusion protein
YML034W	1.59009	9.06982e-35	7.38056e-33	100.709	106.061	34.942	36.137	No	SRC1	Inner nuclear membrane protein; highly enriched at telomeres and subtelomeric regions; functions in regulation of subtelomeric genes and is linked to TREX (transcription export) factors; SRC1 produces 2 splice variant proteins with different functions; alternative splicing of SRC1 pre-mRNA is promoted by Hub1p; mutant has aneuploidy tolerance; SEC1 has a paralog, HEH2, that arose from the whole g…
YML062C	1.58055	2.59395e-28	1.46134e-26	81.473	75.913	26.792	27.643	No	MFT1	Subunit of the THO complex; THO is a nuclear complex comprised of Hpr1p, Mft1p, Rlr1p, and Thp2p, that is involved in transcription elongation and mitotic recombination; involved in telomere maintenance Mft1p
YMR214W	1.57787	8.19925e-35	6.76611e-33	245.025	207.593	79.748	77.257	No	SCJ1	One of several homologs of bacterial chaperone DnaJ; located in the ER lumen where it cooperates with Kar2p to mediate maturation of proteins Scj1p
YML085C	1.57239	2.19574e-50	5.59341e-48	403.095	451.416	146.822	150.503	No	TUB1	Alpha-tubulin; associates with beta-tubulin (Tub2p) to form tubulin dimer, which polymerizes to form microtubules; relative distribution to nuclear foci increases upon DNA replication stress; TUB1 has a paralog, TUB3, that arose from the whole genome duplication alpha-tubulin TUB1
YHL050C	1.5663	4.15861e-06	2.4537e-05	12.359	9.114	3.939	3.503	No	YHL050C	hypothetical protein; potential Cdc28p substrate hypothetical protein
YMR184W	1.56146	3.46011e-39	3.97506e-37	246.887	217.97	82.779	80.346	No	ADD37	hypothetical protein; involved in ER-associated protein degradation; green fluorescent protein (GFP)-fusion protein localizes to the cytoplasm and is induced in response to the DNA-damaging agent MMS; YMR184W is not an essential gene; protein abundance increases in response to DNA replication stress Add37p
YMR200W	1.55191	3.76682e-49	8.174e-47	333.852	364.387	119.919	126.553	No	ROT1	Molecular chaperone involved in protein folding in ER; mutation causes defects in cell wall synthesis and lysis of autophagic bodies, suppresses tor2 mutations, and is synthetically lethal with kar2-1 and with rot2 mutations; involved in N-linked glycosylation and O-mannosylation; transmembrane helix Ser250 is essential for Rot1p to interact with other membrane components and exert its functional…
YML128C	1.53704	3.69013e-19	9.87235e-18	287.403	420.379	133.146	119.16	No	MSC1	hypothetical protein; mutant is defective in directing meiotic recombination events to homologous chromatids; the authentic, non-tagged protein is detected in highly purified mitochondria and is phosphorylated Msc1p
YMR197C	1.53648	2.29025e-38	2.43974e-36	205.692	235.785	79.544	78.006	No	VTI1	Protein involved in cis-Golgi membrane traffic; v-SNARE that interacts with two t-SNARES, Sed5p and Pep12p; required for multiple vacuolar sorting pathways; human homolog VTI1A can complement yeast null mutant v-SNARE protein VTI1
YML063W	1.53262	3.95756e-67	2.57637e-64	3739.22	3652.58	1280.49	1364.32	No	RPS1B	Ribosomal protein 10 (rp10) of the small (40S) subunit; homologous to mammalian ribosomal protein S3A, no bacterial homolog; RPS1B has a paralog, RPS1A, that arose from the whole genome duplication ribosomal 40S subunit protein S1B
YMR052W	1.52867	3.24637e-23	1.1741e-21	81.363	71.178	28.414	26.274	No	FAR3	hypothetical protein; involved in recovery from cell cycle arrest in response to pheromone, in a Far1p-independent pathway; interacts with Far7p, Far8p, Far9p, Far10p, and Far11p; localizes to the endoplasmic reticulum; protein abundance increases in response to DNA replication stress Far3p
YML055W	1.52519	2.49362e-51	6.64097e-49	297.168	293.321	108.671	103.66	No	SPC2	Subunit of signal peptidase complex; complex catalyzes cleavage of N-terminal signal sequences of proteins targeted to the secretory pathway; homologous to mammalian SPC25; other members of the complex are Spc1p, Spc1p, and Sec11p signal peptidase complex subunit SPC2
YML054C	1.52137	2.69844e-19	7.38793e-18	64.887	82.004	27.369	25.612	No	CYB2	Cytochrome b2 (L-lactate cytochrome-c oxidoreductase); component of the mitochondrial intermembrane space, required for lactate utilization; expression is repressed by glucose and anaerobic conditions Cyb2p
YBR200W-A	1.51852	0.000203009	0.000855092	159.554	95.291	51.861	40.328	No	YBR200W-A	hypothetical protein; identified by fungal homology and RT-PCR hypothetical protein
YMR191W	1.51616	1.88951e-56	6.51216e-54	397.758	415.925	148.494	145.985	No	SPG5	Protein required for proteasome assembly during quiescence; binds to base of the proteasome regulartory particle; required for survival at high temperature during stationary phase; not required for growth on nonfermentable carbon sources Spg5p
YML069W	1.50951	2.41708e-36	2.28414e-34	165.377	177.941	65.486	59.313	No	POB3	Subunit of the heterodimeric FACT complex (Spt16p-Pob3p); FACT associates with chromatin via interaction with Nhp6Ap and Nhp6Bp, and reorganizes nucleosomes to facilitate access to DNA by RNA and DNA polymerases; protein abundance increases in response to DNA replication stress FACT complex subunit POB3
YMR295C	1.50563	2.92888e-58	1.12938e-55	1172.37	1167.42	408.877	444.057	No	YMR295C	hypothetical protein that associates with ribosomes; green fluorescent protein (GFP)-fusion protein localizes to the cell periphery and bud; not an essential gene; protein abundance increases in response to DNA replication stress; YMR295C has a paralog, YGR273C, that arose from the whole genome duplication hypothetical protein
YML018C	1.49787	9.90049e-43	1.4148e-40	183.962	185.707	66.683	68.849	No	YML018C	hypothetical protein; green fluorescent protein (GFP)-fusion protein localizes to the membrane of the vacuole; physical interaction with Atg27p suggests a possible role in autophagy; YML018C is not an essential gene; relative distribution to the vacuolar membrane decreases upon DNA replication stress; YML018C has a paralog, THI74, that arose from the whole genome duplication hypothetical protein
YML010W	1.48923	6.05178e-32	3.98398e-30	107.338	112.985	41.674	39.545	No	SPT5	Spt4p/5p (DSIF) transcription elongation factor complex subunit; the Spt4/5 complex binds to ssRNA in a sequence-specific manner, and in concert with RNAP I and II has multiple roles regulating transcriptional elongation, RNA processing, quality control, and transcription-coupled repair; interacts with DNA upstream of RNAPII and the non-template strand of the transcription bubble; Spt5p is the on…
YGL055W	1.48211	3.38943e-24	1.35093e-22	305.484	392.028	119.784	138.549	No	OLE1	Delta(9) fatty acid desaturase; required for monounsaturated fatty acid synthesis and for normal distribution of mitochondria stearoyl-CoA 9-desaturase
YMR123W	1.47677	1.04183e-32	7.63013e-31	413.226	418.321	139.216	170.056	No	PKR1	V-ATPase assembly factor; functions with other V-ATPase assembly factors in the ER to efficiently assemble the V-ATPase membrane sector (V0); protein abundance increases in response to DNA replication stress Pkr1p
YGR169C-A	1.46583	9.27057e-44	1.39272e-41	233.024	248.754	89.825	90.708	No	LSO2	Protein with a potential role in response to iron deprivation; localizes to nucleus and cytoplasm, and nuclear localization is enhanced under iron-replete conditions; null mutant exhibits slow growth during iron deprivation; LSO2 has a paralog, LSO1, that arose from the whole genome duplication Lso2p
YMR243C	1.4648	1.17017e-39	1.45873e-37	313.241	351.727	120.607	128.713	No	ZRC1	Vacuolar membrane zinc transporter; transports zinc from cytosol to vacuole for storage; also has role in resistance to zinc shock resulting from sudden influx of zinc into cytoplasm; human ortholog SLC30A10 functions as a Mn transporter and mutations in SLC30A10 cause neurotoxic accumulation of Mn in liver and brain; ZRC1 has a paralog, COT1, that arose from the whole genome duplication Zn(2+) t…
YMR183C	1.46369	4.18676e-38	4.22935e-36	155.163	159.732	60.087	58.074	No	SSO2	Plasma membrane t-SNARE; involved in fusion of secretory vesicles at the plasma membrane; syntaxin homolog that is functionally redundant with Sso1p; SSO2 has a paralog, SSO1, that arose from the whole genome duplication syntaxin
YDR261C-D	1.4611	1.48998e-13	2.37222e-12	30.789	29.409	11.189	11.463	No	YDR261C-D	Retrotransposon TYA Gag and TYB Pol genes; Gag processing produces capsid proteins, Pol is cleaved to produce protease, reverse transcriptase and integrase activities; in YDRCTy1-3 TYB is mutant and probably non-functional gag-pol fusion protein
YMR079W	1.46046	2.83024e-32	1.99788e-30	243.329	247.687	84.392	100.313	No	SEC14	Phosphatidylinositol/phosphatidylcholine transfer protein; involved in regulating PtdIns, PtdCho, and ceramide metabolism, products of which regulate intracellular transport and UPR; has a role in localization of lipid raft proteins; functionally homologous to mammalian PITPs; SEC14 has a paralog, YKL091C, that arose from the whole genome duplication phosphatidylinositol/phosphatidylcholine trans…
YDR033W	1.46024	2.59303e-38	2.71295e-36	875.23	968.228	321.913	371.37	No	MRH1	Protein that localizes primarily to the plasma membrane; also found at the nuclear envelope; long-lived protein that is asymmetrically retained in the plasma membrane of mother cells; the authentic, non-tagged protein is detected in mitochondria in a phosphorylated state; null mutation confers sensitivity to acetic acid Mrh1p
YMR188C	1.45841	3.89126e-23	1.39017e-21	107.293	129.79	42.395	46.912	No	MRPS17	Mitochondrial ribosomal protein of the small subunit mitochondrial 37S ribosomal protein MRPS17
YMR131C	1.45688	2.00646e-39	2.39916e-37	223.167	208.604	80.062	82.713	No	RRB1	Specific chaperone for ribosomal protein Rpl3p; binds to nascent Rpl3p during translation; essential gene ribosome biosynthesis protein RRB1
YMR049C	1.45662	9.74956e-32	6.27722e-30	120.211	115.886	43.465	45.595	No	ERB1	Constituent of 66S pre-ribosomal particles; forms a complex with Nop7p and Ytm1p that is required for maturation of the large ribosomal subunit; required for maturation of the 25S and 5.8S ribosomal RNAs; homologous to mammalian Bop1 Erb1p
YMR246W	1.45467	2.56478e-36	2.38524e-34	323.455	378.235	134.232	130.658	No	FAA4	Long chain fatty acyl-CoA synthetase; activates fatty acids with a preference for C12:0-C16:0 chain lengths; role in the competitive import of long-chain fatty acids and sphingoid long-chain bases; role in stationary phase survival; localizes to lipid particles and the plasma membrane; role in sphingolipid-to-glycerolipid metabolism; forms cytoplasmic foci upon replication stress; faa1 faa4 doubl…
YML032C	1.45392	6.14786e-30	3.75211e-28	107.384	112.087	43.117	39.76	No	RAD52	Protein that stimulates strand exchange; stimulates strand exchange by facilitating Rad51p binding to single-stranded DNA; anneals complementary single-stranded DNA; involved in the repair of double-strand breaks in DNA during vegetative growth and meiosis and UV induced sister chromatid recombination recombinase RAD52
YMR310C	1.44747	3.64034e-32	2.53914e-30	116.186	122.548	44.755	45.853	No	YMR310C	Putative methyltransferase; predicted to be involved in ribosome biogenesis; green fluorescent protein (GFP)-fusion protein localizes to the nucleus; not an essential gene; YMR310C has a paralog, YGR283C, that arose from the whole genome duplication putative methyltransferase
YOL084W	1.44307	5.93626e-10	6.28942e-09	39.792	63.562	19.406	19.923	No	PHM7	hypothetical protein; expression is regulated by phosphate levels; green fluorescent protein (GFP)-fusion protein localizes to the cell periphery and vacuole; protein abundance increases in response to DNA replication stress Phm7p
YBR090C	1.439	1.19144e-22	4.08223e-21	80.456	72.273	28.813	29.527	No	YBR090C	hypothetical protein; green fluorescent protein (GFP)-fusion protein localizes to the cytoplasm and nucleus hypothetical protein
YML025C	1.43898	2.00022e-27	1.0371e-25	166.028	188.664	72.745	62.644	No	YML6	Mitochondrial ribosomal protein of the large subunit; has similarity to E. coli L4 ribosomal protein and human mitoribosomal MRP-L4 protein; essential for viability, unlike most other mitoribosomal proteins mitochondrial 54S ribosomal protein YmL6
YMR072W	1.43812	4.41325e-47	8.61907e-45	400.353	415.57	150.252	161.373	No	ABF2	Mitochondrial DNA-binding protein; involved in mitochondrial DNA replication and recombination, member of HMG1 DNA-binding protein family; activity may be regulated by protein kinase A phosphorylation; ABF2 has a paralog, IXR1, that arose from the whole genome duplication; human homolog TFAM can complement yeast abf2 mutant, rescuing the loss-of-mitochondrial DNA phenotype in a yeast abf2 strain …
YMR296C	1.43616	4.77891e-46	7.99989e-44	270.267	277.012	103.246	106.061	No	LCB1	Component of serine palmitoyltransferase; responsible along with Lcb2p for the first committed step in sphingolipid synthesis, which is the condensation of serine with palmitoyl-CoA to form 3-ketosphinganine serine C-palmitoyltransferase LCB1
YER137C	1.43614	8.60473e-27	4.20126e-25	92.797	91.296	33.838	36.61	No	YER137C	hypothetical protein
YMR093W	1.43137	3.94454e-32	2.71895e-30	121.889	129.21	48.932	47.437	No	UTP15	Nucleolar protein; component of the small subunit (SSU) processome containing the U3 snoRNA that is involved in processing of pre-18S rRNA snoRNA-binding rRNA-processing protein UTP15
YHR094C	1.42005	0.00602931	0.0165538	210.689	112.339	51.08	74.047	No	HXT1	Low-affinity glucose transporter of the major facilitator superfamily; expression is induced by Hxk2p in the presence of glucose and repressed by Rgt1p when glucose is limiting; HXT1 has a paralog, HXT6, what arose from the whole genome duplication hexose transporter HXT1
YEL076C	1.41981	0.00669965	0.0181476	5.116	3.135	1.63	1.566	No	YEL076C	hypothetical protein
YMR092C	1.40627	2.38766e-35	2.05725e-33	163.534	174.048	67.091	64.744	No	AIP1	Actin cortical patch component; interacts with the actin depolymerizing factor cofilin; inhibits elongation of aged ADP-actin filaments decorated with cofilin to maintain a high level of assembly-competent actin species; required to restrict cofilin localization to cortical patches; putative regulator of cytokinesis; contains WD repeats; protein increases in abundance and relocalizes from cytopla…
YML015C	1.4017	8.34254e-31	5.2558e-29	116.7	120.826	45.851	47.196	No	TAF11	TFIID subunit (40 kDa); involved in RNA polymerase II transcription initiation, similar to histone H3 with atypical histone fold motif of Spt3-like transcription factors Taf11p
YMR002W	1.39626	1.33657e-49	3.13237e-47	926.694	1015.99	380.141	383.651	No	MIX17	Mitochondrial intermembrane space protein; required for normal oxygen consumption; contains twin cysteine-x9-cysteine motifs; protein abundance increases in response to DNA replication stress Mix17p
YPL061W	1.39482	2.68009e-24	1.08294e-22	254.808	213.319	86.344	97.972	No	ALD6	Cytosolic aldehyde dehydrogenase; activated by Mg2+ and utilizes NADP+ as the preferred coenzyme; required for conversion of acetaldehyde to acetate; constitutively expressed; locates to the mitochondrial outer surface upon oxidative stress aldehyde dehydrogenase (NADP(+)) ALD6
YML071C	1.39468	1.40175e-23	5.26465e-22	82.995	86.552	35.205	31.541	No	COG8	Component of the conserved oligomeric Golgi complex; a cytosolic tethering complex (Cog1p through Cog8p) that functions in protein trafficking to mediate fusion of transport vesicles to Golgi compartments Golgi transport complex subunit COG8
YML030W	1.39377	1.65237e-30	1.02992e-28	121.486	119.095	46.513	48.229	No	RCF1	Cytochrome c oxidase subunit; required for assembly of the Complex III-Complex IV supercomplex, and for assembly of Cox13p and Rcf2p into cytochrome c oxidase; similar to Rcf2p, and either Rcf1p or Rcf2p is required for late-stage assembly of the Cox12p and Cox13p subunits and for cytochrome c oxidase activity; required for growth under hypoxic conditions; member of the hypoxia induced gene famil…
YMR164C	1.39302	4.87338e-13	7.45513e-12	40.645	34.274	15.001	14.544	Yes	MSS11	Transcription factor; involved in regulation of invasive growth and starch degradation; controls the activation of FLO11 and STA2 in response to nutritional signals; forms a heterodimer with Flo8p that interacts with the Swi/Snf complex during transcriptional activation of FLO1, FLO11, and STA1 Mss11p
YFL067W	1.38683	0.00233974	0.00735042	4.438	4.912	1.808	1.876	No	YFL067W	hypothetical protein; down-regulated at low calcium levels; mCherry fusion protein localizes to the vacuole hypothetical protein
YMR239C	1.3807	9.04081e-18	2.19793e-16	62.595	75.941	27.514	27.608	No	RNT1	Nuclear dsRNA-specific ribonuclease (RNase III); involved in rDNA transcription, rRNA processing and U2 snRNA 3' end formation by cleavage of a stem-loop structure at the 3' end of U2 snRNA; involved in polyadenylation-independent transcription termination; involved in the cell wall stress response, regulating the degradation of cell wall integrity and morphogenesis checkpoint genes ribonuclease …
YML074C	1.37984	7.23755e-36	6.52382e-34	364.989	337.523	133.197	146.26	No	FPR3	Nucleolar peptidyl-prolyl cis-trans isomerase (PPIase); FK506 binding protein; affects expression of multiple genes via its role in nucleosome assembly; phosphorylated by casein kinase II (Cka1p-Cka2p-Ckb1p-Ckb2p) and dephosphorylated by Ptp1p; PPIase domain acts as a transcriptional repressor when tethered to DNA by lexA, and repressor activity is dependent on PPIase activity; FPR3 has a paralog…
YMR144W	1.37136	7.95944e-20	2.27485e-18	73.652	85.101	33.202	30.268	No	FDO1	Protein involved in directionality of mating type switching; acts with Fkh1p to control which donor mating-type locus is inserted into MAT locus during mating type switching; localized to the nucleus; not an essential gene Fdo1p
YHR146W	1.37129	1.34398e-38	1.45822e-36	202.382	208.604	82.117	82.377	No	CRP1	Protein that binds to cruciform DNA structures; CRP1 has a paralog, MDG1, that arose from the whole genome duplication Crp1p
YOL123W	1.37089	2.72248e-31	1.73381e-29	202.73	229.423	84.001	88.918	No	HRP1	Subunit of cleavage factor I; cleavage factor I is a five-subunit complex required for the cleavage and polyadenylation of pre-mRNA 3' ends; RRM-containing heteronuclear RNA binding protein and hnRNPA/B family member that binds to poly (A) signal sequences; required for genome stability Hrp1p
YML112W	1.36636	3.79171e-21	1.20085e-19	107.889	131.24	49.671	46.266	No	CTK3	Gamma subunit of C-terminal domain kinase I; CTDK-I phosphorylates RNA polymerase II subunit Rpo21p to affect transcription and pre-mRNA 3' end processing, and also phosphorylates ribosomal protein Rps2p to increase translational fidelity; protein abundance increases in response to DNA replication stress Ctk3p
YML060W	1.35511	4.83564e-14	8.26006e-13	49.154	41.938	19.126	17.754	No	OGG1	Nuclear and mitochondrial glycosylase/lyase; specifically excises 7,8-dihydro-8-oxoguanine residues located opposite cytosine or thymine residues in DNA, repairs oxidative damage to mitochondrial DNA, contributes to UVA resistance 8-oxoguanine glycosylase OGG1
YML028W	1.35468	3.8515e-53	1.18768e-50	3861.34	3634.38	1505.09	1529.16	No	TSA1	Thioredoxin peroxidase; acts as both ribosome-associated and free cytoplasmic antioxidant; self-associates to form high-molecular weight chaperone complex under oxidative stress; chaperone activity essential for growth in zinc deficiency; required for telomere length maintenance; binds and modulates Cdc19p activity; protein abundance increases, forms cytoplasmic foci during DNA replication stress…
YMR290C	1.35424	4.60707e-32	3.10262e-30	173.216	164.748	66.547	70.286	No	HAS1	ATP-dependent RNA helicase; involved in the biogenesis of 40S and 60S ribosome subunits; localizes to both the nuclear periphery and nucleolus; highly enriched in nuclear pore complex fractions; constituent of 66S pre-ribosomal particles ATP-dependent RNA helicase HAS1
YMR030W	1.35295	3.71366e-20	1.11012e-18	68.986	73.882	27.514	30.423	No	RSF1	Protein required for respiratory growth; localized to both the nucleus and mitochondrion; may interact with transcription factors to mediate the transition to respiratory growth and activate transcription of nuclear and mitochondrial genes Rsf1p
YMR263W	1.35215	1.35878e-32	9.70867e-31	149.304	148.916	61.488	59.451	No	SAP30	Component of Rpd3L histone deacetylase complex; involved in silencing at telomeres, rDNA, and silent mating-type loci; involved in telomere maintenance Sap30p
YKL054C	1.35146	3.28924e-38	3.38099e-36	229.833	239.8	97.219	93.29	No	DEF1	RNAPII degradation factor; forms a complex with Rad26p in chromatin, enables ubiquitination and proteolysis of RNAPII present in an elongation complex; mutant is deficient in Zip1p loading onto chromosomes during meiosis DNA damage-responsive RNA polymerase-degradation factor DEF1
YMR204C	1.3511	1.62916e-11	2.08411e-10	37.739	31.262	13.668	14.321	No	INP1	Peripheral membrane protein of peroxisomes; involved in peroxisomal inheritance; recruitment to peroxisomes is mediated by interaction with Pex3p at the peroxisomal membrane Inp1p
YMR276W	1.35109	3.11393e-45	5.06792e-43	431.123	414.849	172.994	170.315	No	DSK2	Nuclear-enriched ubiquitin-like polyubiquitin-binding protein; required for spindle pole body (SPB) duplication and for transit through the G2/M phase of the cell cycle; involved in proteolysis; interacts with the proteasome; protein abundance increases in response to DNA replication stress Dsk2p
YMR071C	1.34926	2.65769e-35	2.25673e-33	252.571	267.992	101.285	110.192	No	TVP18	Integral membrane protein; localized to late Golgi vesicles along with the v-SNARE Tlg2p; may interact with ribosomes, based on co-purification experiments; may have a role in intracellular sterol transport Tvp18p
YML115C	1.34754	2.72233e-26	1.29676e-24	124.466	114.819	49.891	47.402	No	VAN1	Component of the mannan polymerase I; complex contains Van1p and Mnn9p and is involved in the first steps of mannan synthesis; mutants are vanadate-resistant Van1p
YMR238W	1.34727	4.59803e-34	3.59198e-32	300.918	323.815	134.13	120.046	No	DFG5	Putative mannosidase; essential glycosylphosphatidylinositol (GPI)-anchored membrane protein required for cell wall biogenesis in bud formation, involved in filamentous growth, homologous to Dcw1p putative mannan endo-1,6-alpha-mannosidase
YMR269W	1.34571	1.74971e-15	3.48693e-14	82.244	83.969	28.999	38.676	No	TMA23	Nucleolar protein implicated in ribosome biogenesis; deletion extends chronological lifespan Tma23p
YDR034W-B	1.34255	0.0126909	0.0311896	518.492	324.789	122.195	222.226	No	YDR034W-B	Predicted tail-anchored plasma membrane protein; contains conserved CYSTM module; related proteins in other organisms may be involved in response to stress; N- and C-terminal fusion proteins localize to the cell periphery; YDR034W-B has a paralog, YBR056W-A, that arose from the whole genome duplication hypothetical protein
YMR146C	1.34005	3.86691e-46	6.6636e-44	765.975	832.168	323.959	329.398	No	TIF34	eIF3i subunit of the eukaryotic translation initiation factor 3 (eIF3); subunit of the core complex of eIF3; essential for translation; stimulates rate of ribosomal scanning during translation reinitiation; eIF3 is also involved in programmed stop codon readthrough translation initiation factor eIF3 subunit i
YMR307W	1.33229	4.2127e-28	2.30675e-26	1055.47	867.145	393.563	397.085	No	GAS1	Beta-1,3-glucanosyltransferase; required for cell wall assembly and also has a role in transcriptional silencing; localizes to cell surface via a glycosylphosphatidylinositol (GPI) anchor; also found at nuclear periphery; genetic interactions with histone H3 lysine acetyltransferases GCN5 and SAS3 indicate previously unsuspected functions for Gas1 in DNA damage response and cell cycle regulation …
YML031W	1.33161	4.12062e-27	2.06348e-25	118.423	125.084	51.912	48.22	No	NDC1	Subunit of the transmembrane ring of the nuclear pore complex (NPC); contributes to nucleocytoplasmic transport, NPC biogenesis and spindle pole body duplication; homologous to human NDC1 Ndc1p
YKL082C	1.33113	5.34965e-25	2.30468e-23	129.261	149.72	57.311	57.454	No	RRP14	Essential protein, constituent of 66S pre-ribosomal particles; interacts with proteins involved in ribosomal biogenesis and cell polarity; member of the SURF-6 family ribosome biosynthesis protein RRP14
YDL085C-A	1.33103	1.10453e-21	3.63565e-20	231.337	261.255	112.457	90.183	No	YDL085C-A	hypothetical protein; green fluorescent protein (GFP)-fusion protein localizes to the cytoplasm and nucleus hypothetical protein
YMR202W	1.32605	1.88206e-47	3.8024e-45	525.112	515.034	213.93	215.54	No	ERG2	C-8 sterol isomerase; catalyzes isomerization of delta-8 double bond to delta-7 position at an intermediate step in ergosterol biosynthesis; transcriptionally down-regulated when ergosterol is in excess; mutation is functionally complemented by human EBP C-8 sterol isomerase ERG2
YMR044W	1.32416	1.89219e-23	7.01668e-22	91.77	93.934	40.112	36.662	No	IOC4	Member of a complex (Isw1b) with Isw1p and Ioc2p; interacts directly with H3K36me3 nucleosomes through its PWWP domain to recruit the Isw1b complex to open reading frames in a Set2p-dependent manner; Isw1b exhibits nucleosome-stimulated ATPase activity and acts within coding regions to coordinate transcription elongation with termination and processing Ioc4p
YOR372C	1.32322	5.2349e-20	1.52593e-18	76.733	84.231	31.546	35.035	Yes	NDD1	Transcriptional activator essential for nuclear division; localized to the nucleus; essential component of the mechanism that activates the expression of a set of late-S-phase-specific genes; turnover is tightly regulated during cell cycle and in response to DNA damage Ndd1p
YML120C	1.32211	6.86643e-21	2.15136e-19	123.943	149.393	53.975	59.089	No	NDI1	NADH:ubiquinone oxidoreductase; transfers electrons from NADH to ubiquinone in respiratory chain but does not pump protons, in contrast to higher eukaryotic multisubunit respiratory complex I; upon apoptotic stress, is activated in mitochondria by N-terminal cleavage, then translocates to cytoplasm to induce apoptosis; homolog of human AIFM2; yeast NDI1 complements several phenotypes of human cel…
YMR198W	1.32046	2.68161e-13	4.21221e-12	38.261	44.801	17.004	17.488	No	CIK1	Kinesin-associated protein; required for both karyogamy and mitotic spindle organization, interacts stably and specifically with Kar3p and may function to target this kinesin to a specific cellular role; locus encodes a long and short transcript with differing functions; CIK1 has a paralog, VIK1, that arose from the whole genome duplication Cik1p
YMR114C	1.30956	9.30706e-27	4.50662e-25	126.804	132.84	56.598	51.852	No	YMR114C	hypothetical protein; may interact with ribosomes, based on co-purification experiments; green fluorescent protein (GFP)-fusion protein localizes to the nucleus and cytoplasm; YMR114C is not an essential gene putative peptide hydrolase
YML101C	1.30911	6.08618e-22	2.01463e-20	132.818	156.214	63.491	57.256	No	CUE4	hypothetical protein; has a CUE domain that binds ubiquitin, which may facilitate intramolecular monoubiquitination; CUE4 has a paralog, CUE1, that arose from the whole genome duplication Cue4p
YMR124W	1.30696	3.29664e-25	1.46326e-23	137.018	149.468	63.288	56.585	No	EPO1	Protein involved in septin-ER tethering; interacts with ER membrane protein, Scs2p, and Shs1p, a septin ring component, at bud neck to create ER diffusion barrier; GFP-fusion protein localizes to the cell periphery, cytoplasm, bud, and bud neck; interacts with Crm1p in two-hybrid assay; YMR124W has a paralog, YLR031W, that arose from the whole genome duplication Epo1p
YML124C	1.29605	1.37425e-39	1.67745e-37	286.101	294.21	122.101	122.516	No	TUB3	Alpha-tubulin; associates with beta-tubulin (Tub2p) to form tubulin dimer, which polymerizes to form microtubules; expressed at lower level than Tub1p; TUB3 has a paralog, TUB1, that arose from the whole genome duplication alpha-tubulin TUB3
YML035C	1.29555	1.12666e-23	4.31443e-22	92.357	98.042	39.84	40.483	No	AMD1	AMP deaminase; tetrameric enzyme that catalyzes the deamination of AMP to form IMP and ammonia; thought to be involved in regulation of intracellular purine (adenine, guanine, and inosine) nucleotide pools AMP deaminase
YMR022W	1.29124	4.16518e-32	2.83765e-30	374.149	340.854	156.941	145.503	No	UBC7	Ubiquitin conjugating enzyme; involved in the ER-associated protein degradation (ERAD) pathway and in the inner nuclear membrane-associated degradation (INMAD) pathway; requires Cue1p for recruitment to the ER membrane; proposed to be involved in chromatin assembly E2 ubiquitin-conjugating protein UBC7
YMR001C	1.29115	2.99524e-20	8.99953e-19	85.113	96.545	39.662	37.152	No	CDC5	Polo-like kinase; controls targeting and activation of Rho1p at cell division site via Rho1p guanine nucleotide exchange factors; regulates Spc72p; also functions in adaptation to DNA damage during meiosis; regulates the shape of the nucleus and expansion of the nuclear envelope during mitosis; similar to Xenopus Plx1 and S. pombe Plo1p; human homologs PLK1, PLK3 can each complement yeast cdc5 th…
YMR302C	1.29033	3.98328e-21	1.25473e-19	85.618	92.793	39.39	36.077	No	YME2	Integral inner mitochondrial membrane protein; role in maintaining mitochondrial nucleoid structure and number; mutants exhibit an increased rate of mitochondrial DNA escape; shows some sequence similarity to exonucleases Yme2p
YER002W	1.28434	1.94835e-29	1.17684e-27	207.104	220.215	86.268	95.287	No	NOP16	Constituent of 66S pre-ribosomal particles; involved in 60S ribosomal subunit biogenesis Nop16p
YMR205C	1.28315	2.53301e-37	2.43293e-35	331.358	327.858	135.701	144.686	No	PFK2	Beta subunit of heterooctameric phosphofructokinase; involved in glycolysis; indispensable for anaerobic growth; activated by fructose-2,6-bisphosphate and AMP; mutation inhibits glucose induction of cell cycle-related genes 6-phosphofructokinase subunit beta
YMR108W	1.27792	4.47792e-34	3.54543e-32	304.741	284.834	128.545	123.196	No	ILV2	Acetolactate synthase; catalyses the first common step in isoleucine and valine biosynthesis and is the target of several classes of inhibitors, localizes to the mitochondria; expression of the gene is under general amino acid control acetolactate synthase catalytic subunit
YBR009C	1.27278	6.05671e-50	1.47859e-47	3231.88	3093.63	1349.52	1360.53	No	HHF1	Histone H4; core histone protein required for chromatin assembly and chromosome function; one of two identical histone proteins (see also HHF2); contributes to telomeric silencing; N-terminal domain involved in maintaining genomic integrity histone H4
YMR313C	1.26885	9.91033e-20	2.79157e-18	74.056	74.519	30.825	33.03	No	TGL3	Bifunctional triacylglycerol lipase and LPE acyltransferase; major lipid particle-localized triacylglycerol (TAG) lipase; catalyzes acylation of lysophosphatidylethanolamine (LPE), a function which is essential for sporulation; protein level and stability of Tgl3p are markedly reduced in the absence of lipid droplets; required with Tgl4p for timely bud formation bifunctional triglyceride lipase/l…
YLR390W-A	1.26841	3.93022e-41	5.35515e-39	1469.5	1353.52	600.59	612.668	No	CCW14	Covalently linked cell wall glycoprotein; present in the inner layer of the cell wall Ccw14p
YML119W	1.26539	1.78413e-10	2.0141e-09	134.79	216.145	76.955	73.995	No	YML119W	hypothetical protein; YML119W is not an essential gene; potential Cdc28p substrate hypothetical protein
YMR227C	1.26503	2.46489e-18	6.14543e-17	78.2	72.498	33.974	30.973	No	TAF7	TFIID subunit (67 kDa); involved in RNA polymerase II transcription initiation Taf7p
YMR233W	1.2579	4.05455e-11	4.94909e-10	36.29	33.367	14.024	16.111	No	TRI1	Non-essential sumoylated hypothetical protein; similar to components of human SWI/SNF complex including SMRD3; green fluorescent protein (GFP)-fusion protein localizes to the cytoplasm, nucleus and nucleolus; TRI1 has a paralog, UAF30, that arose from the whole genome duplication Tri1p
YMR047C	1.25696	7.37333e-19	1.91152e-17	92.439	91.951	43.185	36.645	No	NUP116	FG-nucleoporin component of central core of the nuclear pore complex; contributes directly to nucleocytoplasmic transport and maintenance of the nuclear pore complex (NPC) permeability barrier; forms a stable association with Nup82p, Gle2p and two other FG-nucleoporins (Nsp1p and Nup159p); NUP116 has a paralog, NUP100, that arose from the whole genome duplication FG-nucleoporin NUP116
YDR224C	1.25259	2.3397e-27	1.19203e-25	1663.92	1393.27	654.497	674.115	No	HTB1	Histone H2B; core histone protein required for chromatin assembly and chromosome function; nearly identical to HTB2; Rad6p-Bre1p-Lge1p mediated ubiquitination regulates reassembly after DNA replication, transcriptional activation, meiotic DSB formation and H3 methylation histone H2B
YML110C	1.24979	4.31059e-19	1.14799e-17	244.805	302.828	110.641	127.585	No	COQ5	2-hexaprenyl-6-methoxy-1,4-benzoquinone methyltransferase; involved in ubiquinone (Coenzyme Q) biosynthesis; localizes to the matrix face of the mitochondrial inner membrane in a large complex with other ubiquinone biosynthetic enzymes; respiratory defect of the null mutant is partially complemented by human COQ5 2-hexaprenyl-6-methoxy-1,4-benzoquinone methyltransferase
YML126C	1.24688	4.54042e-29	2.60807e-27	201.391	188.205	83.84	86.113	No	ERG13	3-hydroxy-3-methylglutaryl-CoA (HMG-CoA) synthase; catalyzes the formation of HMG-CoA from acetyl-CoA and acetoacetyl-CoA; involved in the second step in mevalonate biosynthesis hydroxymethylglutaryl-CoA synthase
YMR217W	1.24553	5.80822e-38	5.76786e-36	533.089	501.055	223.412	228.122	No	GUA1	GMP synthase; highly conserved enzyme that catalyzes the second step in the biosynthesis of GMP from inosine 5'-phosphate (IMP); transcription is not subject to regulation by guanine but is negatively regulated by nutrient starvation; reduction-of-function mutation gua1-G388D causes changes in cellular guanine nucleotide pools, defects in general protein synthesis, and impaired translation of GCN…
YMR294W	1.24186	1.09909e-13	1.77399e-12	45.376	52.099	21.062	21.593	No	JNM1	Component of the yeast dynactin complex; consisting of Nip100p, Jnm1p, and Arp1p; required for proper nuclear migration and spindle partitioning during mitotic anaphase B Jnm1p
YMR024W	1.24166	5.2699e-25	2.28714e-23	118.433	121.051	53.822	51.06	No	MRPL3	Mitochondrial ribosomal protein of the large subunit; located in close proximity to the polypeptide exit channel of the ribosome; mutations in human homolog MRPL44 cause childhood cardiomyopathy; human MRPL44 deficiency results in inefficient assembly of the mitochondrial ribosome, and in tissue-specific respiratory chain deficiency, manifesting as either Complex I+Complex IV or Complex IV defici…
YDR074W	1.24041	1.80483e-21	5.84227e-20	216.071	262.49	101.141	108.48	No	TPS2	Phosphatase subunit of the trehalose-6-P synthase/phosphatase complex; involved in synthesis of the storage carbohydrate trehalose; expression is induced by stress conditions and repressed by the Ras-cAMP pathway; protein abundance increases in response to DNA replication stress trehalose-phosphatase TPS2
YBR078W	1.23963	3.08972e-40	4.02282e-38	1179.7	1096.37	495.298	502.596	No	ECM33	GPI-anchored hypothetical protein; possible role in apical bud growth; GPI-anchoring on the plasma membrane crucial to function; phosphorylated in mitochondria; similar to Sps2p; ECM33 has a paralog, PST1, that arose from the whole genome duplication Ecm33p
YBR162C	1.23851	1.20526e-32	8.71803e-31	646.378	594.858	261.376	283.226	No	TOS1	Covalently-bound cell wall hypothetical protein; identified as a cell cycle regulated SBF target gene; deletion mutants are highly resistant to treatment with beta-1,3-glucanase; has sequence similarity to YJL171C Tos1p
YOL109W	1.23716	3.19186e-36	2.92205e-34	2593.49	2931.77	1238.99	1186.58	No	ZEO1	Peripheral membrane protein of the plasma membrane; interacts with Mid2p; regulates the cell integrity pathway mediated by Pkc1p and Slt2p; the authentic protein is detected in a phosphorylated state in highly purified mitochondria Zeo1p
YMR242C	1.23689	1.62867e-44	2.51115e-42	3086.77	3023.95	1299.85	1383.92	No	RPL20A	Ribosomal 60S subunit protein L20A; homologous to mammalian ribosomal protein L18A, no bacterial homolog; RPL20A has a paralog, RPL20B, that arose from the whole genome duplication ribosomal 60S subunit protein L20A
YMR099C	1.22976	4.06068e-34	3.25911e-32	266.288	270.247	115.785	120.984	No	YMR099C	Glucose-6-phosphate 1-epimerase (hexose-6-phosphate mutarotase); likely involved in carbohydrate metabolism; GFP-fusion protein localizes to both the nucleus and cytoplasm and is induced in response to the DNA-damaging agent MMS glucose-6-phosphate 1-epimerase
YML016C	1.22595	2.25352e-27	1.15819e-25	144.866	148.317	65.919	63.814	No	PPZ1	Serine/threonine protein phosphatase Z, isoform of Ppz2p; involved in regulation of potassium transport, which affects osmotic stability, cell cycle progression, and halotolerance salt homeostasis regulator
YMR121C	1.22238	2.73199e-28	1.52445e-26	219.426	236.347	105.174	97.051	No	RPL15B	Ribosomal 60S subunit protein L15B; binds to 5.8 S rRNA; homologous to mammalian ribosomal protein L15, no bacterial homolog; RPL15B has a paralog, RPL15A, that arose from the whole genome duplication; relocalizes from nucleus to nucleolus upon DNA replication stress ribosomal 60S subunit protein L15B
YMR314W	1.22171	1.88441e-35	1.64788e-33	429.647	449.526	188.53	201.649	No	PRE5	Alpha 6 subunit of the 20S proteasome; protein abundance increases in response to DNA replication stress proteasome core particle subunit alpha 6
YGR189C	1.22006	2.10171e-41	2.93188e-39	1127.91	1086.52	504.611	479.471	No	CRH1	Chitin transglycosylase; functions in the transfer of chitin to beta(1-6) and beta(1-3) glucans in the cell wall; similar and functionally redundant to Utr2; localizes to sites of polarized growth; expression induced by cell wall stress transglycosylase
YMR255W	1.21998	1.48468e-24	6.12589e-23	192.883	221.872	93.883	90.381	No	GFD1	Coiled-coiled hypothetical protein; identified as a high-copy suppressor of a dbp5 mutation; protein abundance increases in response to DNA replication stress Gfd1p
YMR091C	1.21973	4.93396e-19	1.30806e-17	90.477	84.446	40.409	37.325	No	NPL6	Component of the RSC chromatin remodeling complex; interacts with Rsc3p, Rsc30p, Ldb7p, and Htl1p to form a module important for a broad range of RSC functions Npl6p
YMR005W	1.21945	2.47929e-22	8.2535e-21	130.627	119.338	56.7	54.425	No	TAF4	TFIID subunit (48 kDa); involved in RNA polymerase II transcription initiation; potential Cdc28p substrate Taf4p
YML072C	1.21688	3.60692e-18	8.89516e-17	87.653	81.892	35.893	39.657	No	TCB3	Cortical ER protein involved in ER-plasma membrane tethering; one of 6 proteins (Ist2p, Scs2p, Scs22p, Tcb1p, Tcb2p, Tcb3p) that connect ER to the plasma membrane (PM) and regulate PM phosphatidylinositol-4-phosphate (PI4P) levels by controlling access of Sac1p phosphatase to its substrate PI4P in the PM; localized to the bud via specific mRNA transport; non-tagged protein detected in a phosphory…
YMR235C	1.21609	5.05565e-27	2.51026e-25	193.928	196.093	82.567	91.216	No	RNA1	GTPase activating protein (GAP) for Gsp1p; involved in nuclear transport GTPase-activating protein RNA1
YLR180W	1.21022	1.27199e-23	4.83933e-22	348.742	361.646	144.649	173.146	No	SAM1	S-adenosylmethionine synthetase; catalyzes transfer of the adenosyl group of ATP to the sulfur atom of methionine; SAM1 has a paralog, SAM2, that arose from the whole genome duplication methionine adenosyltransferase SAM1
YMR158W	1.20852	7.23826e-23	2.52434e-21	133.974	133.299	56.623	63.091	No	MRPS8	Mitochondrial ribosomal protein of the small subunit mitochondrial 37S ribosomal protein MRPS8
YMR230W	1.20791	6.17321e-43	9.04221e-41	3832.72	4138.45	1769.74	1801.51	No	RPS10B	Protein component of the small (40S) ribosomal subunit; homologous to mammalian ribosomal protein S10, no bacterial homolog; RPS10B has a paralog, RPS10A, that arose from the whole genome duplication; mutations in the human homolog associated with Diamond-Blackfan anemia ribosomal 40S subunit protein S10B
YMR219W	1.20668	6.63085e-10	6.96239e-09	37.473	31.467	15.136	15.827	No	ESC1	Protein involved in telomeric silencing; required for quiescent cell telomere hypercluster localization at nuclear membrane vicinity; interacts with PAD4-domain of Sir4p Esc1p
YMR122W-A	1.20107	9.01414e-34	6.85894e-32	3666.02	3411.37	1518.48	1668.33	No	YMR122W-A	hypothetical protein; green fluorescent protein (GFP)-fusion protein localizes to the cytoplasm and endoplasmic reticulum hypothetical protein
YML109W	1.20079	9.88284e-14	1.61742e-12	48.659	54.298	23.872	22.471	No	ZDS2	Protein with a role in regulating Swe1p-dependent polarized growth; involved in maintenance of Cdc55p in the cytoplasm where it promotes mitotic entry; interacts with silencing proteins at the telomere; implicated in the mitotic exit network through regulation of Cdc14p localization; ZDS2 has a paralog, ZDS1, that arose from the whole genome duplication Zds2p
YBL113C	1.20057	0.000148126	0.000640493	17.714	11.21	6.74	6.282	No	YBL113C	Helicase-like protein encoded within the telomeric Y' element hypothetical protein
YMR196W	1.19944	9.76717e-13	1.43423e-11	89.487	120.938	48.406	46.352	No	YMR196W	hypothetical protein; green fluorescent protein (GFP)-fusion protein localizes to the cytoplasm; YMR196W is not an essential gene hypothetical protein
YML013W	1.19732	1.87371e-21	5.99896e-20	105.844	109.233	50.545	46.516	No	UBX2	Bridging factor involved in ER-associated protein degradation (ERAD); bridges the cytosolic Cdc48p-Npl1p-Ufd1p ATPase complex and the membrane associated Ssm4p and Hrd1p ubiquitin ligase complexes; contains a UBX (ubiquitin regulatory X) domain and a ubiquitin-associated (UBA) domain; redistributes from the ER to lipid droplets during the diauxic shift and stationary phase; required for the maint…
YMR153W	1.19542	1.9037e-22	6.41023e-21	106.55	105.724	47.396	48.581	No	NUP53	FG-nucleoporin component of central core of nuclear pore complex (NPC); also part of the NPC nuclear basket; contributes directly to nucleocytoplasmic transport; involved in regulation of transcription and mitosis; induces membrane tubulation, which may contribute to nuclear pore assembly; NUP53 has a paralog, ASM4, that arose from the whole genome duplication FG-nucleoporin NUP53
YMR277W	1.19488	1.97795e-16	4.24497e-15	94.979	81.536	40.035	39.752	No	FCP1	Carboxy-terminal domain (CTD) phosphatase; essential for dephosphorylation of the repeated C-terminal domain of the RNA polymerase II large subunit (Rpo21p); relocalizes to the cytosol in response to hypoxia protein serine/threonine phosphatase
YDR002W	1.19418	1.24505e-38	1.37637e-36	645.213	683.543	305.113	295.955	No	YRB1	Ran GTPase binding protein; involved in nuclear protein import and RNA export, ubiquitin-mediated protein degradation during the cell cycle; shuttles between the nucleus and cytoplasm; is essential; homolog of human RanBP1 Ran GTPase-binding protein YRB1
YML007W	1.19397	7.89712e-25	3.32872e-23	145.435	156.401	66.861	69.675	Yes	YAP1	Basic leucine zipper (bZIP) transcription factor; required for oxidative stress tolerance; activated by H2O2 through the multistep formation of disulfide bonds and transit from the cytoplasm to the nucleus; Yap1p is degraded in the nucleus after the oxidative stress has passed; mediates resistance to cadmium; relative distribution to the nucleus increases upon DNA replication stress; YAP1 has a p…
YML113W	1.19379	1.64455e-27	8.68056e-26	161.031	163.597	74.451	72.48	No	DAT1	DNA binding protein that recognizes oligo(dA).oligo(dT) tracts; Arg side chain in its N-terminal pentad Gly-Arg-Lys-Pro-Gly repeat is required for DNA-binding; relocalizes to the cytosol in response to hypoxia; not essential for viability Dat1p
YMR148W	1.18809	2.90577e-19	7.91855e-18	197.357	243.758	99.384	100.967	No	OSW5	hypothetical protein with possible role in spore wall assembly; predicted to contain an N-terminal transmembrane domain; osw5 null mutant spores exhibit increased spore wall permeability and sensitivity to beta-glucanase digestion Osw5p
YMR104C	1.18721	1.02403e-25	4.72422e-24	265.068	298.383	132.967	123.188	No	YPK2	Protein kinase similar to S/T protein kinase Ypk1p; functionally redundant with YPK1 at the genetic level; participates in a signaling pathway required for optimal cell wall integrity; involved in the TORC-dependent phosphorylation of ribosomal proteins Rps6a/b (S6); human homolog SGK2 can complement a ypk1 ypk2 double mutant putative protein kinase YPK2
YER042W	1.18714	1.61025e-14	2.89401e-13	134.79	169.473	63.423	74.873	No	MXR1	Methionine-S-sulfoxide reductase; involved in the response to oxidative stress; protects iron-sulfur clusters from oxidative inactivation along with MXR2; involved in the regulation of lifespan; reduced activity of human homolog implicated in Alzheimer disease peptide-methionine-S-sulfoxide reductase
YML020W	1.18175	4.17469e-13	6.45369e-12	52.326	48.216	21.996	23.934	No	YML020W	hypothetical protein
YMR145C	1.18163	5.30436e-15	1.00252e-13	240.056	325.144	131.015	126.759	No	NDE1	Mitochondrial external NADH dehydrogenase; type II NAD(P)H:quinone oxidoreductase that catalyzes the oxidation of cytosolic NADH; Nde1p and Nde2p provide cytosolic NADH to the mitochondrial respiratory chain; NDE1 has a paralog, NDE2, that arose from the whole genome duplication NADH-ubiquinone reductase (H(+)-translocating) NDE1
YMR128W	1.18112	4.50395e-15	8.56774e-14	58.258	55.749	25.68	26.343	No	ECM16	Essential DEAH-box ATP-dependent RNA helicase specific to U3 snoRNP; predominantly nucleolar in distribution; required for 18S rRNA synthesis ATP-dependent RNA helicase ECM16
YMR112C	1.17937	4.53408e-13	6.97248e-12	174.637	137.622	78.39	64.331	No	MED11	Subunit of the RNA polymerase II mediator complex; associates with core polymerase subunits to form the RNA polymerase II holoenzyme; essential protein Med11p
YMR074C	1.17887	3.48578e-28	1.92672e-26	460.307	484.455	229.652	202.26	No	SDD2	Protein with homology to human PDCD5; PDCD5 is involved in programmed cell death; N-terminal region forms a conserved triple-helix bundle structure; overproduction suppresses lethality due to expression of the dominant PET9 allele AAC2-A128P; overexpression promotes H2O2-induced apoptosis; YMR074C is not an essential gene; protein abundance increases in response to DNA replication stress Sdd2p
YMR305C	1.17207	5.1821e-13	7.88621e-12	1364.7	946.735	542.464	520.169	No	SCW10	Cell wall protein with similarity to glucanases; may play a role in conjugation during mating based on mutant phenotype and its regulation by Ste12p; SWC10 has a paralog, SCW4, that arose from the whole genome duplication putative family 17 glucosidase
YML027W	1.17149	8.0978e-14	1.34405e-12	111.914	89.013	47.056	45.354	Yes	YOX1	Homeobox transcriptional repressor; binds to Mcm1p and to early cell cycle boxes (ECBs) in the promoters of cell cycle-regulated genes expressed in M/G1 phase; expression is cell cycle-regulated; phosphorylated by Cdc28p; relocalizes from nucleus to cytoplasm upon DNA replication stress; YOX1 has a paralog, YHP1, that arose from the whole genome duplication Yox1p
YML043C	1.168	6.51781e-15	1.22397e-13	59.652	57.667	26.189	27.867	No	RRN11	Component of the core factor (CF) rDNA transcription factor complex; CF is required for transcription of 35S rRNA genes by RNA polymerase I and is composed of Rrn6p, Rrn7p, and Rrn11p Rrn11p
YGL008C	1.16781	1.03738e-22	3.57531e-21	918.855	861.708	372.772	447.629	No	PMA1	Plasma membrane P2-type H+-ATPase; pumps protons out of cell; major regulator of cytoplasmic pH and plasma membrane potential; long-lived protein asymmetrically distributed at plasma membrane between mother cells and buds; accumulates at high levels in mother cells during aging, buds emerge with very low levels of Pma1p, newborn cells have low levels of Pma1p; Hsp30p plays a role in Pma1p regulat…
YML037C	1.16489	8.57766e-06	4.76817e-05	16.944	15.533	8.404	6.575	No	YML037C	hypothetical protein; has some characteristics of a transcriptional activator; may be a target of Dbf2p-Mob1p kinase; GFP-fusion protein co-localizes with clathrin-coated vesicles; YML037C is not an essential gene hypothetical protein
snR86	1.16233	5.49277e-29	3.12448e-27	215.878	225.876	101.005	103.247	No	snR86	- -
YMR048W	1.15939	3.20316e-16	6.82448e-15	68.06	65.48	30.731	31.171	No	CSM3	Replication fork associated factor; required for stable replication fork pausing; component of the DNA replication checkpoint pathway; required for accurate chromosome segregation during meiosis; forms nuclear foci upon DNA replication stress Csm3p
YML061C	1.15687	2.78486e-11	3.45688e-10	41.754	38.204	18.464	18.675	No	PIF1	DNA helicase, potent G-quadruplex DNA binder/unwinder; possesses strand annealing activity; promotes DNA synthesis during break-induced replication; important for crossover recombination; translation from different start sites produces mitochondrial and nuclear forms; nuclear form is a catalytic inhibitor of telomerase; mitochondrial form involved in DNA repair and recombination; mutations affect…
YMR186W	1.15427	4.93538e-30	3.04383e-28	1184.11	1069.04	539.366	508.732	No	HSC82	Cytoplasmic chaperone of the Hsp90 family; plays a role in determining prion variants; redundant in function and nearly identical with Hsp82p, and together they are essential; expressed constitutively at 10-fold higher basal levels than HSP82 and induced 2-3 fold by heat shock; contains two acid-rich unstructured regions that promote the solubility of chaperone-substrate complexes; HSC82 has a pa…
YCL042W	1.14965	5.74141e-07	3.9252e-06	30.422	28.305	16.172	11.265	No	YCL042W	hypothetical protein; epitope-tagged protein localizes to the cytoplasm hypothetical protein
YMR221C	1.14884	9.7015e-15	1.78746e-13	86.342	74.21	36.877	38.091	No	FMP42	hypothetical protein; the authentic, non-tagged protein is detected in highly purified mitochondria in high-throughput studies; physical interaction with Atg27p suggests a possible role in autophagy Fmp42p
YGR229C	1.14809	2.45979e-24	1.00783e-22	139.732	141.57	66.013	65.415	No	SMI1	Protein involved in the regulation of cell wall synthesis; proposed to be involved in coordinating cell cycle progression with cell wall integrity Smi1p
snR83	1.14529	5.83973e-18	1.43159e-16	347.028	424.346	168.563	192.243	No	snR83	- -
YLL066C	1.14119	0.0054336	0.0151598	12.424	8.683	6.783	3.133	No	YLL066C	Putative Y' element ATP-dependent helicase; YLL066C is not an essential gene Y' element ATP-dependent helicase
YMR080C	1.14064	8.08458e-17	1.82183e-15	71.626	74.771	34.05	34.7	No	NAM7	ATP-dependent RNA helicase of the SFI superfamily; involved in nonsense mediated mRNA decay; required for efficient translation termination at nonsense codons and targeting of NMD substrates to P-bodies; binds to the small ribosomal subunit via an interaction with Rps26; forms cytoplasmic foci upon DNA replication stress ATP-dependent RNA helicase NAM7
YML114C	1.14041	1.30587e-23	4.93617e-22	138.365	145.266	66.649	66.559	No	TAF8	TFIID subunit (65 kDa); involved in RNA polymerase II transcription initiation Taf8p
YNL030W	1.13412	2.28703e-23	8.37483e-22	4044.71	3382.25	1742.53	1761.49	No	HHF2	Histone H4; core histone protein required for chromatin assembly and chromosome function; one of two identical histone proteins (see also HHF1); contributes to telomeric silencing; N-terminal domain involved in maintaining genomic integrity histone H4
YML086C	1.13263	1.04548e-20	3.20705e-19	109.548	111.928	51.139	53.401	No	ALO1	D-Arabinono-1,4-lactone oxidase; catalyzes the final step in biosynthesis of dehydro-D-arabinono-1,4-lactone, which is protective against oxidative stress D-arabinono-1,4-lactone oxidase
YML041C	1.1319	1.92198e-15	3.81463e-14	75.119	80.161	34.517	38.822	No	VPS71	Nucleosome-binding component of the SWR1 complex; SWR1 exchanges histone variant H2AZ (Htz1p) for chromatin-bound histone H2A; required for vacuolar protein sorting Vps71p
YML088W	1.12962	5.6359e-19	1.48742e-17	90.743	93.869	44.119	43.228	No	UFO1	F-box receptor protein; subunit of the Skp1-Cdc53-F-box receptor (SCF) E3 ubiquitin ligase complex; binds to phosphorylated Ho endonuclease, allowing its ubiquitination by SCF and subsequent degradation SCF ubiquitin ligase complex subunit UFO1
YDR039C	1.12821	4.4796e-05	0.000215308	12.304	12.791	6.121	5.749	No	ENA2	P-type ATPase sodium pump; involved in Na+ efflux to allow salt tolerance; likely not involved in Li+ efflux Na(+)-exporting P-type ATPase ENA2
YML012W	1.12773	1.06168e-35	9.42485e-34	791.877	787.639	364.427	383.849	No	ERV25	Member of the p24 family involved in ER to Golgi transport; role in misfolded protein quality control; forms a heterotrimeric complex with Erp1, Erp2p, and Emp24 Erv25p
YMR040W	1.12756	8.44204e-14	1.39329e-12	97.179	81.134	43.482	41.017	No	YET2	hypothetical protein that may interact with ribosomes; based on co-purification experiments; homolog of human BAP31 protein; YET2 has a paralog, YET1, that arose from the whole genome duplication Yet2p
YMR037C	1.12673	3.61333e-18	8.89516e-17	84.517	87.225	40.366	41.068	Yes	MSN2	Stress-responsive transcriptional activator; activated in stochastic pulses of nuclear localization in response to various stress conditions; binds DNA at stress response elements of responsive genes; relative distribution to nucleus increases upon DNA replication stress stress-responsive transcriptional activator MSN2
YOL030W	1.1253	3.56535e-23	1.28156e-21	296.425	266.495	138.29	128.893	No	GAS5	1,3-beta-glucanosyltransferase; has similarity to Gas1p; localizes to the cell wall 1,3-beta-glucanosyltransferase
YKL122C	1.12509	1.21494e-18	3.10844e-17	93.915	101.513	46.411	46.309	No	SRP21	Subunit of the signal recognition particle (SRP); SRP functions in protein targeting to the endoplasmic reticulum membrane; not found in mammalian SRP; forms a pre-SRP structure in the nucleolus that is translocated to the cytoplasm signal recognition particle subunit SRP21
YMR264W	1.12386	5.77478e-28	3.13282e-26	309.766	291.076	141.032	144.341	No	CUE1	Ubiquitin-binding protein; ER membrane protein that recruits and integrates the ubiquitin-conjugating enzyme Ubc7p into ER membrane-bound ubiquitin ligase complexes that function in the ER-associated degradation (ERAD) pathway for misfolded proteins; contains a CUE domain that binds ubiquitin to facilitate intramolecular monoubiquitination and to promote diubiquitin elongation, facilitating polyu…
YML081C-A	1.12175	1.69131e-09	1.66824e-08	157.024	239.809	90.097	98.523	No	ATP18	Subunit of the mitochondrial F1F0 ATP synthase; F1F0 ATP synthase is a large, evolutionarily conserved enzyme complex required for ATP synthesis; termed subunit I or subunit j; does not correspond to known ATP synthase subunits in other organisms F1F0 ATP synthase subunit i
YMR078C	1.11768	1.48143e-11	1.91605e-10	52.702	46.223	23.566	23.632	No	CTF18	Subunit of a complex with Ctf8p; shares some subunits with Replication Factor C and is required for sister chromatid cohesion; may have overlapping functions with Rad24p in the DNA damage replication checkpoint Ctf18p
YMR038C	1.11767	3.86965e-26	1.82841e-24	269.799	291.571	138.154	129.642	No	CCS1	Copper chaperone for superoxide dismutase Sod1p; involved in oxidative stress protection; Met-X-Cys-X2-Cys motif within N-terminus is involved in insertion of copper into Sod1p under conditions of copper deprivation; required for regulation of yeast copper genes in response to DNA-damaging agents; protein abundance increases in response to DNA replication stress; human homolog CCS can complement …
YNL160W	1.11687	1.83002e-23	6.82936e-22	1252.78	1492.36	639.641	670.139	No	YGP1	Cell wall-related secretory glycoprotein; induced by nutrient deprivation-associated growth arrest and upon entry into stationary phase; may be involved in adaptation prior to stationary phase entry; YGP1 has a paralog, SPS100, that arose from the whole genome duplication Ygp1p
YJR137C	1.11401	1.27365e-07	9.74192e-07	25.003	24.019	10.968	12.487	No	MET5	Sulfite reductase beta subunit; involved in amino acid biosynthesis, transcription repressed by methionine sulfite reductase (NADPH) subunit beta
YDL208W	1.11074	1.23985e-18	3.15839e-17	412.997	430.11	181.008	223.018	No	NHP2	Protein related to mammalian high mobility group (HMG) proteins; nuclear protein; essential for function of H/ACA-type snoRNPs, which are involved in 18S rRNA processing snoRNA-binding protein NHP2
YMR125W	1.10295	7.5087e-12	1.01134e-10	54.444	56.825	24.619	29.028	No	STO1	Large subunit of the nuclear mRNA cap-binding protein complex; interacts with Npl3p to carry nuclear poly(A)+ mRNA to cytoplasm; also involved in nuclear mRNA degradation and telomere maintenance; orthologous to mammalian CBP80 Sto1p
YMR193W	1.10291	2.60817e-15	5.14521e-14	84.783	98.435	44.076	44.201	No	MRPL24	Mitochondrial ribosomal protein of the large subunit; two mitochondrial ribosomal proteins, YmL14 and YmL24, have been assigned to the same gene mitochondrial 54S ribosomal protein YmL24/YmL14
YDR146C	1.09934	1.13736e-07	8.76814e-07	48.75	72.516	28.244	30.311	Yes	SWI5	Transcription factor that recruits Mediator and Swi/Snf complexes; activates transcription of genes expressed at the M/G1 phase boundary and in G1 phase; required for expression of the HO gene controlling mating type switching; localization to nucleus occurs during G1 and appears to be regulated by phosphorylation by Cdc28p kinase; SWI5 has a paralog, ACE2, that arose from the whole genome duplic…
YMR140W	1.09891	3.51813e-19	9.45537e-18	106.504	114.323	53.686	52.979	No	SIP5	hypothetical protein; interacts with both the Reg1p/Glc7p phosphatase and the Snf1p kinase; forms cytoplasmic foci upon DNA replication stress Sip5p
YMR028W	1.0977	5.04155e-13	7.69229e-12	77.843	67.931	33.745	36.8	No	TAP42	Essential protein involved in the TOR signaling pathway; physically associates with the protein phosphatase 2A and the SIT4 protein phosphatase catalytic subunits Tap42p
YMR111C	1.09725	8.18593e-11	9.66962e-10	45.101	44.23	23.125	20.112	No	YMR111C	hypothetical protein; green fluorescent protein (GFP)-fusion protein localizes to the nucleus; YMR111C is not an essential gene; forms nuclear foci upon DNA replication stress hypothetical protein
YMR013C	1.0957	9.30866e-10	9.50165e-09	65.877	51.454	29.254	27.557	No	SEC59	Dolichol kinase; catalyzes the terminal step in dolichyl monophosphate (Dol-P) biosynthesis; required for viability and for normal rates of lipid intermediate synthesis and protein N-glycosylation dolichol kinase
YMR182C	1.09555	7.40129e-11	8.81386e-10	127.097	175.471	69.222	77.24	Yes	RGM1	Putative zinc finger DNA binding transcription factor; contains two N-terminal C2H2 zinc fingers and C-terminal proline rich domain; overproduction impairs cell growth and induces expression of genes involved in monosaccharide catabolism and aldehyde metabolism; regulates expression of of Y' telomeric elements and subtelomeric COS genes; relocalizes to the cytosol in response to hypoxia; RGM1 has…
YMR253C	1.09538	8.73305e-14	1.43325e-12	63.338	71.459	32.302	32.97	No	YMR253C	hypothetical protein; green fluorescent protein (GFP)-fusion protein localizes to the cytoplasm in a punctate pattern; YMR253C is not an essential gene hypothetical protein
YGR295C	1.09423	6.14825e-07	4.17411e-06	107.183	66.294	40.409	43.779	No	COS6	Endosomal protein involved in turnover of plasma membrane proteins; member of the DUP380 subfamily of conserved, often subtelomeric COS genes; required for the multivesicular vesicle body sorting pathway that internalizes plasma membrane proteins for degradation; Cos proteins provide ubiquitin in trans for nonubiquitinated cargo proteins Cos6p
YMR261C	1.09246	4.3932e-15	8.41168e-14	70.086	76.484	35.536	35.612	No	TPS3	Regulatory subunit of trehalose-6-phosphate synthase/phosphatase; involved in synthesis of storage carbohydrate trehalose; expression is induced by stress conditions and repressed by the Ras-cAMP pathway; TPS3 has a paralog, TSL1, that arose from the whole genome duplication trehalose 6-phosphate synthase/phosphatase complex subunit
YMR132C	1.09054	4.86542e-12	6.70742e-11	62.476	57.246	27.166	30.982	No	JLP2	hypothetical protein; contains sequence that closely resembles a J domain (typified by the E. coli DnaJ protein) Jlp2p
YMR061W	1.08732	3.04758e-15	5.97184e-14	69.141	72.554	34.237	34.769	No	RNA14	Component of the cleavage and polyadenylation factor I (CF I); CF 1, composed of the CF 1A complex (Rna14p, Rna15p, Clp1p, Pcf11p) and Hrp1, is involved in cleavage and polyadenylation of mRNA 3' ends; bridges interaction between Rna15p and Hrp1p in the CF I complex; mutant displays reduced transcription elongation in the G-less-based run-on (GLRO) assay; required for gene looping and maintenance…
YDL173W	1.08533	6.94269e-23	2.43576e-21	168.916	174.984	86.344	81.414	No	PAR32	hypothetical protein; hyperphosphorylated upon rapamycin treatment in a Tap42p-dependent manner; green fluorescent protein (GFP)-fusion protein localizes to the cytoplasm; PAR32 is not an essential gene Par32p
YMR086W	1.0845	2.75923e-16	5.90013e-15	80.016	85.55	40.808	40.018	No	SEG1	Component of eisosome required for proper eisosome assembly; precedes Pil1p/Lsp1p during eisosome formation, controls eisosome length and shape; diffusely distributed, forms heterogeneous patches at plasma membrane in small buds, also found in medium and large buds; expression repressed by cAMP; similar to A. gossypii SEG gene and to S. pombe Sle1p, important for generating eisosomes; SEG1 has a …
YMR032W	1.08319	6.79469e-12	9.17283e-11	58.524	70.121	31.453	31.421	No	HOF1	Protein that regulates actin cytoskeleton organization; required for cytokinesis, actin cable organization, and secretory vesicle trafficking; localized to bud neck; phosphorylated by Dbf2p; regulates actomyosin ring dynamics and septin localization; contains an SH3 domain; N terminus controls cell size and levels of actin cables, while C terminus controls actin cable organization via direct regu…
YMR203W	1.08112	2.84024e-15	5.58422e-14	236.233	267.562	110.513	135.907	No	TOM40	Component of the TOM (translocase of outer membrane) complex; responsible for recognition and initial import steps for all mitochondrially directed proteins; constitutes the core element of the protein conducting pore; pre-Tom40p is phosphorylated by PKA, which impairs its import into mitochondria under non-respiratory conditions Tom40p
YPR143W	1.08035	1.2299e-16	2.71392e-15	106.513	120.209	53.729	57.248	No	RRP15	Nucleolar protein; constituent of pre-60S ribosomal particles; required for proper processing of the 27S pre-rRNA at the A3 and B1 sites to yield mature 5.8S and 25S rRNAs Rrp15p
YML098W	1.07806	1.23226e-20	3.74085e-19	175.82	184.463	93.136	83.522	No	TAF13	TFIID subunit (19 kDa); involved in RNA polymerase II transcription initiation, similar to histone H4 with atypical histone fold motif of Spt3-like transcription factors Taf13p
YMR236W	1.07757	9.93244e-28	5.33892e-26	421.212	457.058	219.575	211.168	No	TAF9	Subunit (17 kDa) of TFIID and SAGA complexes; involved in RNA polymerase II transcription initiation and in chromatin modification, similar to histone H3 chromatin modification protein
YML092C	1.07381	1.9057e-27	9.9692e-26	413.4	452.249	212.24	213.405	No	PRE8	Alpha 2 subunit of the 20S proteasome proteasome core particle subunit alpha 2
YMR025W	1.0735	4.61812e-05	0.000221421	17.228	14.307	7.233	8.296	No	CSI1	Subunit of the Cop9 signalosome; which is required for deneddylation, or removal of the ubiquitin-like protein Rub1p from Cdc53p (cullin); involved in adaptation to pheromone signaling; functional equivalent of canonical Csn6 subunit of the COP9 signalosome Csi1p
YNL018C	1.07154	0.00522991	0.0146753	7.628	5.801	3.447	3.133	No	YNL018C	hypothetical protein; YNL018C has a paralog, YNL034W, that arose from a segmental duplication hypothetical protein
YMR213W	1.06787	6.15403e-14	1.04209e-12	64.126	63.552	32.234	30.818	No	CEF1	Essential splicing factor; associated with Prp19p and the spliceosome, contains an N-terminal c-Myb DNA binding motif necessary for cell viability but not for Prp19p association, evolutionarily conserved and homologous to S. pombe Cdc5p Cef1p
YCL043C	1.06418	5.91057e-19	1.54598e-17	1345.01	1110.91	621.058	595.197	No	PDI1	Protein disulfide isomerase; multifunctional oxidoreductase of the ER lumen, essential for disulfide bond formation in secretory and cell-surface proteins, processing of non-native disulfide bonds; Ero1p activator; complexes with exomannosidase, Mnl1p to facilitate the recognition of misfolded glycoproteins and the trimming of glycan Man8GlcNAc2 to Man7GlcNAc2 on substrates, thereby accelerating …
YMR004W	1.06205	7.88469e-16	1.61526e-14	81.941	88.414	41.996	42.402	No	MVP1	Protein required for sorting proteins to the vacuole; Mvp1p and Vps1p act in concert to promote membrane traffic to the vacuole; participates in transcription initiation and/or early elongation of specific genes; interacts with 'foot domain' of RNA polymerase II; deletion results in abnormal CTD-Ser5 phosphorylation of RNA polymerase II at specific promoter regions; protein abundance increases in…
YML094W	1.06008	2.41436e-22	8.08329e-21	209.698	202.643	98.798	105.932	No	GIM5	Subunit of the heterohexameric cochaperone prefoldin complex; prefoldin binds specifically to cytosolic chaperonin and transfers target proteins to it; prefoldin complex also localizes to chromatin of actively transcribed genes in the nucleus and facilitates transcriptional elongation Gim5p
YMR149W	1.05659	1.40762e-19	3.90864e-18	302.275	266.748	136.728	146.51	No	SWP1	Delta subunit of the oligosaccharyl transferase glycoprotein complex; complex is required for N-linked glycosylation of proteins in the endoplasmic reticulum dolichyl-diphosphooligosaccharide-protein glycotransferase
YLR249W	1.05572	3.3902e-25	1.49347e-23	1065.52	953.023	495.043	510.341	No	YEF3	Translation elongation factor 3; contains two ABC cassettes; binds and hydrolyzes ATP; YEF3 has a paralog, HEF3, that arose from the whole genome duplication translation elongation factor EF-3
YML017W	1.0538	5.82509e-13	8.72869e-12	60.871	58.209	29.475	29.915	No	PSP2	Asn rich cytoplasmic protein that contains RGG motifs; high-copy suppressor of group II intron-splicing defects of a mutation in MRS2 and of a conditional mutation in POL1 (DNA polymerase alpha); possible role in mitochondrial mRNA splicing Psp2p
YML038C	1.05321	1.32081e-17	3.15863e-16	108.714	103.956	53.949	52.162	No	YMD8	Putative nucleotide sugar transporter; has similarity to Vrg4p Ymd8p
YER091C	1.05191	1.95965e-11	2.48519e-10	206.691	257.727	102.423	129.324	No	MET6	Cobalamin-independent methionine synthase; involved in methionine biosynthesis and regeneration; requires a minimum of two glutamates on the methyltetrahydrofolate substrate, similar to bacterial metE homologs 5-methyltetrahydropteroyltriglutamate-homocysteine S-methyltransferase
YKL001C	1.05181	5.69936e-24	2.24111e-22	197.091	200.107	100.445	97.886	No	MET14	Adenylylsulfate kinase; required for sulfate assimilation and involved in methionine metabolism; human homolog PAPSS2 complements yeast null mutant adenylyl-sulfate kinase
YDL153C	1.05147	3.76318e-14	6.52322e-13	66.895	69.344	33.507	34.536	No	SAS10	Subunit of U3-containing Small Subunit (SSU) processome complex; involved in production of 18S rRNA and assembly of small ribosomal subunit; disrupts silencing when overproduced; mutant has increased aneuploidy tolerance; essential gene rRNA-processing protein SAS10
YBR010W	1.05052	6.11561e-26	2.84376e-24	808.124	743.914	400.125	375.69	No	HHT1	Histone H3; core histone protein required for chromatin assembly, part of heterochromatin-mediated telomeric and HM silencing; one of two identical histone H3 proteins (see HHT2); regulated by acetylation, methylation, and phosphorylation; H3K14 acetylation plays an important role in the unfolding of strongly positioned nucleosomes during repair of UV damage histone H3
YHR126C	1.04858	0.00384291	0.0112917	25.957	11.827	10.221	8.675	No	ANS1	Putative GPI protein; SWAT-GFP and mCherry fusion proteins localize to the vacuole; transcription dependent upon Azf1p Ans1p
YMR201C	1.04819	1.0796e-12	1.57348e-11	68.133	62.401	33.66	31.662	No	RAD14	Protein that recognizes and binds damaged DNA during NER; subunit of Nucleotide Excision Repair Factor 1 (NEF1); contains zinc finger motif; homolog of human XPA protein; NER stands for nucleotide excision repair Rad14p
YMR041C	1.04734	1.53067e-14	2.77653e-13	72.506	75.061	36.003	37.875	No	ARA2	NAD-dependent arabinose dehydrogenase; involved in biosynthesis of dehydro-D-arabinono-1,4-lactone; similar to plant L-galactose dehydrogenase D-arabinose 1-dehydrogenase (NAD(P)(+)) ARA2
YML046W	1.04211	6.73157e-07	4.51262e-06	29.422	24.487	13.574	13.512	No	PRP39	U1 snRNP protein involved in splicing; contains multiple tetriatricopeptide repeats Prp39p
YML108W	1.04154	5.75547e-09	5.26896e-08	141.996	101.626	57.939	64.623	No	YML108W	hypothetical protein; structure defines a new subfamily of the split beta-alpha-beta sandwiches; green fluorescent protein (GFP)-fusion protein localizes to the cytoplasm and nucleus; YML108W is not an essential gene; relative distribution to the nucleus increases upon DNA replication stress hypothetical protein
YGR103W	1.03307	6.7276e-17	1.52189e-15	105.706	113.181	54.009	56.731	No	NOP7	Component of several different pre-ribosomal particles; forms a complex with Ytm1p and Erb1p that is required for maturation of the large ribosomal subunit; required for exit from G0 and the initiation of cell proliferation mRNA-binding ribosome synthesis protein NOP7
YJL225C	1.03139	0.00645118	0.0175313	17.301	8.702	7.513	5.697	No	YJL225C	Putative Y' element ATP-dependent helicase Y' element ATP-dependent helicase
YMR115W	1.03002	5.38833e-13	8.17881e-12	61.898	61.017	31.3	30.991	No	MGR3	Subunit of the mitochondrial (mt) i-AAA protease supercomplex; i-AAA degrades misfolded mitochondrial proteins; forms a subcomplex with Mgr1p that binds to substrates to facilitate proteolysis; required for growth of cells lacking mtDNA Mgr3p
YKL172W	1.0268	1.43313e-18	3.63495e-17	120.752	126.347	62.311	63.246	No	EBP2	Required for 25S rRNA maturation and 60S ribosomal subunit assembly; localizes to the nucleolus and in foci along nuclear periphery; constituent of 66S pre-ribosomal particles; cooperates with Rrs1p and Mps3p to mediate telomere clustering by binding Sir4p, but is not involved in telomere tethering Ebp2p
YMR094W	1.02532	0.000419975	0.00162848	13.35	11.004	6.579	5.74	No	CTF13	Subunit of the CBF3 complex; CBF3 binds to the CDE III element of centromeres, bending the DNA upon binding, and may be involved in sister chromatid cohesion during mitosis Ctf13p
YMR286W	1.02442	1.16797e-26	5.60914e-25	422.688	441.086	214.116	225.376	No	MRPL33	Mitochondrial ribosomal protein of the large subunit mitochondrial 54S ribosomal protein YmL33
YER085C	1.02291	0.00143085	0.00482355	9.71	15.177	6.511	6.179	No	YER085C	hypothetical protein
YML024W	1.01979	2.58369e-24	1.05124e-22	4348.11	4342.47	2074.98	2361.4	No	RPS17A	Ribosomal protein 51 (rp51) of the small (40s) subunit; homologous to mammalian ribosomal protein S17, no bacterial homolog; RPS17A has a paralog, RPS17B, that arose from the whole genome duplication ribosomal 40S subunit protein S17A
YML064C	1.01722	5.46264e-13	8.27018e-12	109.695	134.553	62.464	62.446	No	TEM1	GTP-binding protein of the Ras superfamily; involved in termination of M-phase; controls actomyosin and septin dynamics during cytokinesis Ras family GTPase TEM1
YGR280C	1.01353	1.02809e-13	1.67788e-12	116.828	135.582	61.063	68.341	No	PXR1	Essential protein involved in rRNA and snoRNA maturation; competes with TLC1 RNA for binding to Est2p, suggesting a role in negative regulation of telomerase; human homolog inhibits telomerase; contains a G-patch RNA interacting domain telomerase inhibitor
YMR308C	1.01024	2.14551e-17	5.02821e-16	134.716	125.467	66.794	66.878	No	PSE1	Karyopherin/importin that interacts with the nuclear pore complex; acts as the nuclear import receptor for specific proteins, including Pdr1p, Yap1p, Ste12p, and Aft1p Pse1p
YML105C	1.00945	1.44541e-13	2.30753e-12	149.781	127.179	68.474	73.978	No	SEC65	Subunit of the signal recognition particle (SRP); involved in protein targeting to the ER; interacts with Srp54p; homolog of mammalian SRP19 RNA-binding signal recognition particle subunit SEC65
YMR076C	1.00667	3.73854e-07	2.63905e-06	25.966	25.722	13.065	13.529	No	PDS5	Cohesion maintenance factor; involved in sister chromatid condensation and cohesion; colocalizes with cohesin on chromosomes; performs its cohesin maintenance function in pre-anaphase cells by protecting the integrity of the cohesion complex; also required during meiosis; relocalizes to the cytosol in response to hypoxia Pds5p
YGR260W	1.00501	4.70789e-14	8.089e-13	111.419	99.651	52.625	56.301	No	TNA1	High affinity nicotinic acid plasma membrane permease; responsible for uptake of low levels of nicotinic acid; expression of the gene increases in the absence of extracellular nicotinic acid or para-aminobenzoate (PABA) Tna1p
HRA1	1.00259	0.0150119	0.0359585	8.298	5.184	3.107	3.873	No	HRA1	- -
YML095C	1.00178	1.31818e-11	1.71627e-10	61.165	57.143	30.077	31.111	No	RAD10	Single-stranded DNA endonuclease (with Rad1p); cleaves single-stranded DNA during nucleotide excision repair and double-strand break repair; subunit of Nucleotide Excision Repair Factor 1 (NEF1); homolog of human ERCC1 protein Rad10p
YBL051C	1.00171	7.21994e-14	1.21556e-12	74.918	78.926	40.502	39.063	No	PIN4	Protein involved in G2/M phase progression and response to DNA damage; interacts with Rad53p; contains an RNA recognition motif, a nuclear localization signal, and several SQ/TQ cluster domains; hyperphosphorylated in response to DNA damage Pin4p
YML048W	1.00167	3.52157e-21	1.12135e-19	248.968	241.662	122.05	131.544	No	GSF2	Endoplasmic reticulum (ER) localized integral membrane protein; may promote secretion of certain hexose transporters, including Gal2p; involved in glucose-dependent repression Gsf2p
YMR225C	1.0015	6.349e-20	1.82347e-18	298.846	273.251	143.316	152.56	No	MRPL44	Mitochondrial ribosomal protein of the large subunit; protein abundance increases in response to DNA replication stress mitochondrial 54S ribosomal protein YmL44
YLR068W	1.00112	6.0355e-20	1.74197e-18	161.792	164.261	82.431	86.19	No	FYV7	Essential protein required for maturation of 18S rRNA; required for survival upon exposure to K1 killer toxin Fyv7p
YDR073W	-1.0005	1.43307e-17	3.41315e-16	60.862	59.987	122.831	127.465	No	SNF11	Subunit of the SWI/SNF chromatin remodeling complex; involved in transcriptional regulation; interacts with a highly conserved 40-residue sequence of Snf2p; relocates to the cytosol under hypoxic conditions Snf11p
snR10	-1.00223	2.35019e-07	1.72987e-06	63.108	65.115	161.237	104.676	No	snR10	- -
YKL102C	-1.00291	6.46259e-05	0.000301708	10.049	7.654	18.43	18.262	No	YKL102C	hypothetical protein; conserved across S. cerevisiae strains; deletion confers sensitivity to citric acid; predicted protein would include a thiol-disulfide oxidoreductase active site hypothetical protein
YOR107W	-1.0039	3.88666e-07	2.73373e-06	15.266	18.302	37.59	32.066	No	RGS2	Negative regulator of glucose-induced cAMP signaling; directly activates the GTPase activity of the heterotrimeric G protein alpha subunit Gpa2p GTPase-activating protein RGS2
YOR264W	-1.00517	1.49578e-05	7.92387e-05	27.084	16.871	46.165	45.259	No	DSE3	Daughter cell-specific protein, may help establish daughter fate; relocalizes from bud neck to cytoplasm upon DNA replication stress Dse3p
YOR015W	-1.0068	5.88755e-19	1.54598e-17	77.412	80.432	170.15	158.326	No	YOR015W	hypothetical protein; conserved among S. cerevisiae strains; YOR015W is not an essential gene hypothetical protein
YOR011W	-1.00852	0.00573948	0.0159222	4.062	3.135	7.004	8.029	No	AUS1	Plasma membrane sterol transporter of the ATP-binding cassette family; required, along with Pdr11p, for uptake of exogenous sterols and their incorporation into the plasma membrane; activity is stimulated by phosphatidylserine; sterol uptake is required for anaerobic growth because sterol biosynthesis requires oxygen; AUS1 has a paralog, PDR11, that arose from the whole genome duplication ATP-bin…
YGR213C	-1.0096	3.99699e-07	2.80796e-06	16.825	23.14	42.361	40.982	No	RTA1	Protein involved in 7-aminocholesterol resistance; has seven potential membrane-spanning regions; expression is induced under both low-heme and low-oxygen conditions; member of the fungal lipid-translocating exporter (LTE) family of protein; RTA1 has a paralog, YLR046C, that arose from the whole genome duplication Rta1p
YNL195C	-1.00984	1.22383e-09	1.22991e-08	47.742	64.975	123.23	111.819	No	YNL195C	hypothetical protein; shares a promoter with YNL194C; the authentic, non-tagged protein is detected in highly purified mitochondria in high-throughput studies; YNL195C has a paralog, HBT1, that arose from the whole genome duplication hypothetical protein
YJR147W	-1.01022	6.24489e-08	4.97131e-07	26.232	20.014	47.854	48.444	Yes	HMS2	Protein with similarity to heat shock transcription factors; overexpression suppresses the pseudohyphal filamentation defect of a diploid mep1 mep2 homozygous null mutant; HMS2 has a paralog, SKN7, that arose from the whole genome duplication Hms2p
YOL143C	-1.01058	3.90372e-25	1.70686e-23	178.616	173	358.96	374.253	No	RIB4	Lumazine synthase (DMRL synthase); catalyzes synthesis of immediate precursor to riboflavin; DMRL synthase stands for 6,7-dimethyl-8-ribityllumazine synthase lumazine synthase RIB4
YKL043W	-1.0148	8.24457e-11	9.7193e-10	42.085	54.429	103.917	97.903	Yes	PHD1	Transcriptional activator that enhances pseudohyphal growth; physically interacts with the Tup1-Cyc8 complex and recruits Tup1p to its targets; regulates expression of FLO11, an adhesin required for pseudohyphal filament formation; similar to StuA, an A. nidulans developmental regulator; potential Cdc28p substrate; PHD1 has a paralog, SOK2, that arose from the whole genome duplication Phd1p
YBR294W	-1.01745	3.61613e-06	2.16193e-05	19.025	13.474	34.848	33.099	No	SUL1	High affinity sulfate permease of the SulP anion transporter family; sulfate uptake is mediated by specific sulfate transporters Sul1p and Sul2p, which control the concentration of endogenous activated sulfate intermediates sulfate permease
YHR160C	-1.01822	0.000102151	0.000457572	15.752	9.759	27.853	25.526	No	PEX18	Peroxin; required for targeting of peroxisomal matrix proteins containing PTS2; interacts with Pex7p; partially redundant with Pex21p; primarily responsible for peroxisomal import during growth on oleate, and expression is induced during oleate growth Pex18p
YJL210W	-1.01924	6.90833e-11	8.29424e-10	28.863	30.85	67.227	57.971	Yes	PEX2	RING-finger peroxin and E3 ubiquitin ligase; peroxisomal membrane protein with a C-terminal zinc-binding RING domain, forms translocation subcomplex with Pex10p and Pex12p which functions in peroxisomal matrix protein import ubiquitin-protein ligase peroxin 2
YPL250C	-1.01943	1.1843e-21	3.87644e-20	102.039	111.123	223.522	223.707	No	ATG41	hypothetical protein; required for selective and nonselective autophagy, and mitophagy; regulates the rate of autophagosome formation; interacts with Atg9p, and has a similar peri-mitochondrial localization; elevated Gcn4p-dependent expression under autophagy-inducing conditions; mobilized into polysomes upon a shift from a fermentable to nonfermentable carbon source; potential Cdc28p substrate; …
YDR534C	-1.02646	0.00577703	0.015996	4.098	3.032	8.319	6.721	No	FIT1	Mannoprotein that is incorporated into the cell wall; incorporated via a glycosylphosphatidylinositol (GPI) anchor; involved in the retention of siderophore-iron in the cell wall Fit1p
YPL041C	-1.02806	7.2121e-09	6.54113e-08	18.127	16.74	35.876	37.72	No	MRX11	Protein that associates with mitochondrial ribosome; SWAT-GFP and mCherry fusion proteins localize to the mitochondria; involved in maintenance of telomere length Mrx11p
YHR029C	-1.02813	1.56403e-09	1.55316e-08	19.089	18.368	38.898	40.182	No	YHI9	hypothetical protein; null mutant is defective in unfolded protein response; possibly involved in a membrane regulation metabolic pathway; member of the PhzF superfamily, though most likely not involved in phenazine production Yhi9p
YIR031C	-1.02984	1.32288e-06	8.44812e-06	18.778	13.717	33.872	34.743	No	DAL7	Malate synthase; can accept butyryl-CoA as acyl-CoA donor in addition to traditional substrate acetyl-CoA; recycles glyoxylate generated during allantoin degradation; SWAT-GFP and mCherry fusion proteins localize to the cytosol; expression sensitive to nitrogen catabolite repression and induced by allophanate, an intermediate in allantoin degradation malate synthase DAL7
YEL028W	-1.02993	3.90485e-09	3.67232e-08	17.439	17.731	38.439	35.982	No	YEL028W	hypothetical protein; conserved among S. cerevisiae strains; YEL028C is not an essential gene hypothetical protein
YIL051C	-1.0302	1.5796e-22	5.34965e-21	552.893	580.785	1116.74	1279.36	No	MMF1	Mitochondrial protein required for transamination of isoleucine; but not of valine or leucine; may regulate specificity of branched-chain transaminases Bat1p and Bat2p; induction of expression in response to stress is mediated by a Hog1p-regulated antisense RNA and gene looping; interacts genetically with mitochondrial ribosomal protein genes; MMF1 has a paralog, HMF1, that arose from the whole g…
YJR073C	-1.03037	2.0181e-09	1.97067e-08	390.836	595.101	1077.29	1005.61	No	OPI3	Methylene-fatty-acyl-phospholipid synthase; catalyzes the last two steps in phosphatidylcholine biosynthesis; also known as phospholipid methyltransferase bifunctional phosphatidyl-N-methylethanolamine N-methyltransferase/phosphatidyl-N-dimethylethanolamine N-methyltransferase
YGR177C	-1.03097	8.34733e-07	5.47671e-06	13.111	11.752	24.661	27.849	No	ATF2	Alcohol acetyltransferase; may play a role in steroid detoxification; forms volatile esters during fermentation, which is important for brewing and winemaking alcohol O-acetyltransferase
YGR138C	-1.03169	3.9805e-16	8.38912e-15	54.692	61.934	126.567	120.356	No	TPO2	Polyamine transporter of the major facilitator superfamily; member of the 12-spanner drug:H(+) antiporter DHA1 family; specific for spermine; localizes to the plasma membrane; transcription of TPO2 is regulated by Haa1p; TPO2 has a paralog, TPO3, that arose from the whole genome duplication spermine transporter
YIR039C	-1.03457	0.0129409	0.0317175	6.363	2.788	10.17	9.32	No	YPS6	Putative GPI-anchored aspartic protease; member of the yapsin family of proteases involved in cell wall growth and maintenance aspartyl protease
YPR157W	-1.03554	0.000666479	0.00244821	4.841	7.242	12.615	13.116	No	TDA6	hypothetical protein; induced by treatment with 8-methoxypsoralen and UVA irradiation; null mutant is sensitive to expression of the top1-T722A allele; SWAT-GFP and mCherry fusion proteins localize to the cell periphery and vacuole; TDA6 has a paralog, VPS62, that arose from the whole genome duplication Tda6p
YLR037C	-1.04119	3.03022e-08	2.52547e-07	22.253	21.727	52.837	40.913	No	PAU23	Cell wall mannoprotein; has similarity to Tir1p, Tir2p, Tir3p, and Tir4p; member of the seripauperin multigene family encoded mainly in subtelomeric regions; expressed under anaerobic conditions, completely repressed during aerobic growth seripauperin PAU23
YHR143W	-1.04355	0.00512395	0.0144263	133.084	83.398	205.559	256.797	No	DSE2	Daughter cell-specific secreted protein with similarity to glucanases; degrades cell wall from the daughter side causing daughter to separate from mother; expression is repressed by cAMP Dse2p
YJL079C	-1.04474	3.09171e-19	8.38628e-18	76.44	70.149	156.169	156.915	No	PRY1	Sterol binding protein involved in the export of acetylated sterols; secreted glycoprotein and member of the CAP protein superfamily (cysteine-rich secretory proteins (CRISP), antigen 5, and pathogenesis related 1 proteins); sterol export function is redundant with that of PRY2; may be involved in detoxification of hydrophobic compounds; PRY1 has a paralog, PRY2, that arose from the whole genome …
YPL095C	-1.04994	1.38423e-09	1.37928e-08	18.539	17.666	39.891	37.626	No	EEB1	Acyl-coenzymeA:ethanol O-acyltransferase; responsible for the major part of medium-chain fatty acid ethyl ester biosynthesis during fermentation; possesses short-chain esterase activity; may be involved in lipid metabolism and detoxification; EEB1 has a paralog, EHT1, that arose from the whole genome duplication medium-chain fatty acid ethyl ester synthase/esterase
YDR539W	-1.05008	0.000302778	0.00121839	12.662	7.336	20.553	22.341	No	FDC1	Ferulic acid decarboxylase, also active on p-coumaric acid; essential for decarboxylation of aromatic carboxylic acids to corresponding vinyl derivatives; co-overproduction of Pad1p and Fdc1p greatly increases cinnamic acid decarboxylase activity; structure implicates Glu285 as the general base in the nonoxidative decarboxylation reaction catalyzed by Fdc1p; homolog of E. coli UbiD; GFP-fusion pr…
YAL060W	-1.05074	6.01852e-20	1.74197e-18	83.821	92.194	195.143	182.311	No	BDH1	NAD-dependent (R,R)-butanediol dehydrogenase; catalyzes oxidation of (R,R)-2,3-butanediol to (3R)-acetoin, oxidation of meso-butanediol to (3S)-acetoin, and reduction of acetoin; enhances use of 2,3-butanediol as an aerobic carbon source (R,R)-butanediol dehydrogenase
YDR079C-A	-1.05243	1.123e-12	1.62863e-11	33.842	30.12	67.082	70.191	No	TFB5	Component of RNA polymerase II general transcription factor TFIIH; involved in transcription initiation and in nucleotide-excision repair; relocalizes to the cytosol in response to hypoxia; homolog of Chlamydomonas reinhardtii REX1-S protein involved in DNA repair TFIIH complex subunit TFB5
YHL022C	-1.05245	0.00243539	0.00760809	4.172	3.79	7.454	9.596	No	SPO11	Meiosis-specific protein that initiates meiotic recombination; initiates meiotic recombination by catalyzing the formation of double-strand breaks in DNA via a transesterification reaction; required for homologous chromosome pairing and synaptonemal complex formation Spo11p
YCR020C	-1.0541	5.36838e-09	4.95328e-08	16.403	16.711	33.94	37.204	No	PET18	hypothetical protein; has weak similarity to proteins involved in thiamin metabolism; expression is induced in the absence of thiamin Pet18p
YJR010C-A	-1.05431	3.66873e-05	0.000179275	31.65	20.014	45.35	65.759	No	SPC1	Subunit of the signal peptidase complex (SPC); SPC cleaves the signal sequence from proteins targeted to the endoplasmic reticulum (ER); homolog of the SPC12 subunit of mammalian signal peptidase complex; protein abundance increases in response to DNA replication stress signal peptidase complex subunit SPC1
YNR068C	-1.05586	1.45084e-07	1.09967e-06	22.353	16.973	39.543	44.95	No	BUL3	hypothetical protein; exhibits homology to C-terminal end of Bul1p; expressed as a readthrough product of BSC5, the readthrough locus being termed BUL3; the BUL3 readthrough product is involved in ubiquitin-mediated sorting of plasma membrane proteins and interacts with WW domains of Rsp5p in vitro, but in a functionally different way than the non-readthrough form hypothetical protein
YOR298W	-1.05624	7.34836e-05	0.000338616	7.454	6.185	14.848	14.527	No	MUM3	hypothetical protein involved in outer spore wall organization; has similarity to the tafazzins superfamily of acyltransferases Mum3p
YLR286C	-1.05915	8.4348e-15	1.55898e-13	238.057	195.186	432.443	502.286	No	CTS1	Endochitinase; required for cell separation after mitosis; transcriptional activation during the G1 phase of the cell cycle is mediated by transcription factor Ace2p Cts1p
YGL196W	-1.06164	2.5839e-12	3.68348e-11	26.938	26.022	59.348	55.156	No	DSD1	D-serine dehydratase (aka D-serine ammonia-lyase); converts D-serine to pyruvate and ammonia by a reaction dependent on pyridoxal 5'-phosphate and zinc; may play a role in D-serine detoxification; L-serine is not a substrate D-serine ammonia-lyase DSD1
LSR1	-1.06234	7.17247e-08	5.67119e-07	19.942	18.611	47.2	36.283	No	LSR1	- -
YPR196W	-1.06535	3.88096e-05	0.000188389	8.234	6.718	16.698	15.689	Yes	YPR196W	Putative maltose-responsive transcription factor putative maltose-responsive transcription factor
YIL009W	-1.06694	9.39519e-06	5.14934e-05	8.032	8.496	19.058	16.877	No	FAA3	Long chain fatty acyl-CoA synthetase; activates imported fatty acids with a preference for C16:0-C18:0 chain lengths; green fluorescent protein (GFP)-fusion protein localizes to the cell periphery long-chain fatty acid-CoA ligase FAA3
YFR035C	-1.06969	1.59979e-14	2.88405e-13	35.978	33.17	75.037	75.234	No	YFR035C	hypothetical protein; deletion mutant exhibits synthetic phenotype with alpha-synuclein hypothetical protein
YIR038C	-1.0702	1.25942e-14	2.29873e-13	58.478	49.929	122.611	113.05	No	GTT1	ER associated glutathione S-transferase; capable of homodimerization; glutathione transferase for Yvc1p vacuolar cation channel; expression induced during the diauxic shift and throughout stationary phase; functional overlap with Gtt2p, Grx1p, and Grx2p bifunctional glutathione transferase/peroxidase
YDL242W	-1.07128	0.000386966	0.00151651	4.694	4.959	10.892	10.121	No	YDL242W	hypothetical protein; conserved across S. cerevisiae strains hypothetical protein
YAR068W	-1.07189	3.15316e-07	2.26402e-06	19.759	14.354	37.183	37.023	No	YAR068W	Fungal-specific hypothetical protein; induced in respiratory-deficient cells; YAR068W has a paralog, YHR214W-A, that arose from a segmental duplication hypothetical protein
YDR246W-A	-1.07739	0.000773138	0.0027893	7.803	14.597	29.076	19.914	No	YDR246W-A	hypothetical protein; identified by fungal homology and RT-PCR hypothetical protein
YLR237W	-1.07807	6.64061e-12	9.00632e-11	26.204	23.664	55.46	53.392	No	THI7	Plasma membrane transporter responsible for the uptake of thiamine; contributes to uptake of 5-aminoimidazole-4-carboxamide-1-beta-D-ribofuranoside (acadesine); member of the major facilitator superfamily of transporters; mutation of human ortholog causes thiamine-responsive megaloblastic anemia thiamine transporter THI7
YDR242W	-1.07871	2.90651e-10	3.24366e-09	21.253	18.695	44.102	43.332	No	AMD2	Putative amidase putative amidase
YDR019C	-1.0805	2.89192e-08	2.41709e-07	16.77	14.756	32.005	36.903	No	GCV1	T subunit of the mitochondrial glycine decarboxylase complex; glycine decarboxylase is required for the catabolism of glycine to 5,10-methylene-THF; expression is regulated by levels of levels of 5,10-methylene-THF in the cytoplasm glycine decarboxylase subunit T
YOL015W	-1.08144	1.3835e-06	8.81079e-06	9.911	9.095	21.181	20.448	No	IRC10	hypothetical protein; subunit of the leading edge protein (LEP) complex (Ssp1-Ady3-Don1-Irc10) that forms a ring-like structure at the leading edge of the prospore membrane during meiosis II; null mutant displays increased levels of spontaneous Rad52p foci Irc10p
YBR291C	-1.09161	1.10695e-10	1.27922e-09	21.886	19.406	44.492	46.705	No	CTP1	Mitochondrial inner membrane citrate transporter; member of the mitochondrial carrier family Ctp1p
YIL169C	-1.09218	2.48033e-06	1.52011e-05	16.999	11.78	30.001	33.417	No	CSS1	hypothetical protein, secreted when constitutively expressed; SWAT-GFP, seamless-GFP and mCherry fusion proteins localize to the cell periphery, SWAT-GFP fusion also localizes to the extracellular region, and mCherry fusion also localizes to the vacuole; S/T rich and highly similar to YOL155C, a putative glucan alpha-1,4-glucosidase; transcript is induced in both high and low pH environments; non…
YGL168W	-1.09232	1.30187e-24	5.40968e-23	107.962	101.57	235.263	227.063	No	HUR1	hypothetical protein; reported null mutant phenotype of hydroxyurea sensitivity may be due to effects on overlapping PMR1 gene Hur1p
YBL088C	-1.09409	8.53285e-05	0.000387851	6.29	5.521	12.564	13.563	No	TEL1	Protein kinase primarily involved in telomere length regulation; contributes to cell cycle checkpoint control in response to DNA damage; acts with Red1p and Mec1p to promote interhomolog recombination by phosphorylation of Hop1; functionally redundant with Mec1p; regulates P-body formation induced by replication stress; homolog of human ataxia-telangiectasia mutated (ATM) gene DNA-binding protein…
YBR219C	-1.09437	8.50729e-09	7.66834e-08	14.597	13.586	31.792	30.517	No	YBR219C	hypothetical protein; YBR219C is not an essential gene hypothetical protein
YDR457W	-1.09493	2.924e-07	2.11242e-06	10.517	10.77	22.48	24.682	No	TOM1	E3 ubiquitin ligase of the hect-domain class; has a role in mRNA export from the nucleus and may regulate transcriptional coactivators; involved in degradation of excess histones; interacts with Dia2p and is required for Dia2p degradation; required to target Cdc6p for ubiquitin-mediated destruction during G1 phase E3 ubiquitin-protein ligase TOM1
YJR155W	-1.09609	4.80965e-08	3.89761e-07	27.305	19.331	53.313	49.872	No	AAD10	Putative aryl-alcohol dehydrogenase; similar to P. chrysosporium aryl-alcohol dehydrogenase; mutational analysis has not yet revealed a physiological role; members of the AAD gene family comprise three pairs (AAD3 + AAD15, AAD6/AAD16 + AAD4, AAD10 + AAD14) whose two genes are more related to one another than to other members of the family putative aryl-alcohol dehydrogenase
YER190C-B	-1.09612	7.00747e-07	4.66554e-06	21.501	18.227	36.215	51.705	No	YER190C-B	hypothetical protein; identified by gene-trapping, microarray-based expression analysis, and genome-wide homology searching hypothetical protein
YIL162W	-1.0977	1.10747e-15	2.2452e-14	33.768	32.824	73.712	73.737	No	SUC2	Invertase; sucrose hydrolyzing enzyme; a secreted, glycosylated form is regulated by glucose repression, and an intracellular, nonglycosylated enzyme is produced constitutively beta-fructofuranosidase SUC2
YDR402C	-1.09822	2.00254e-05	0.000103556	6.977	6.625	15.612	14.605	No	DIT2	N-formyltyrosine oxidase; sporulation-specific microsomal enzyme involved in the production of N,N-bisformyl dityrosine required for spore wall maturation, homologous to cytochrome P-450s; SWAT-GFP and mCherry fusion proteins localize to the endoplasmic reticulum and vacuole respectively putative cytochrome P450
YHL037C	-1.09868	0.00194792	0.00627081	4.979	3.528	10.663	8.193	No	YHL037C	hypothetical protein; conserved among S. cerevisiae strains hypothetical protein
YHR162W	-1.10153	9.79464e-34	7.35728e-32	263.629	265.634	600.251	575.326	No	MPC2	Highly conserved subunit of the mitochondrial pyruvate carrier (MPC); expressed during growth on fermentable carbon sources, and heterodimerizes with Mpc1p to form the fermentative isoform of MPC; MPC localizes to the mitochondrial inner membrane and mediates pyruvate uptake; MPC2 paralog, MPC3, heterodimerizes with Mpc1p to form the respiratory MPC isoform mitochondrial pyruvate carrier
YBR298C	-1.1017	8.60874e-08	6.75215e-07	20.025	14.737	39.322	37.893	No	MAL31	Maltose permease; high-affinity maltose transporter (alpha-glucoside transporter); encoded in the MAL3 complex locus; member of the 12 transmembrane domain superfamily of sugar transporters; functional in genomic reference strain S288C maltose permease
YNR065C	-1.10585	7.94907e-08	6.25149e-07	21.226	16.796	47.09	37.591	No	YNR065C	hypothetical protein; protein-protein interactions suggest a possible role in actin patch formation; YNR065C is not an essential gene hypothetical protein
YLL049W	-1.1065	6.54157e-16	1.34954e-14	45.651	40.366	98.323	93.324	No	LDB18	Component of the dynactin complex; dynactin is required for dynein activity; null mutant exhibits defects in nuclear migration and spindle orientation and has reduced affinity for alcian blue dye; has homology to mammalian dynactin subunit p24 Ldb18p
YNR070W	-1.10654	0.00137641	0.00466149	4.933	3.378	9.067	9.467	No	PDR18	Putative transporter of the ATP-binding cassette (ABC) family; role in plasma membrane sterol incorporation; implicated in pleiotropic drug resistance; provides resistance to ethanol stress and contributes to a decreased intracellular accumulation of ethanol; the authentic, non-tagged protein is detected in highly purified mitochondria in high-throughput studies ATP-binding cassette multidrug tra…
YCR024C-B	-1.10737	6.65204e-15	1.24122e-13	123.604	108.7	231.392	286.72	No	YCR024C-B	hypothetical protein; identified by expression profiling and mass spectrometry hypothetical protein
YGR043C	-1.10839	1.53862e-17	3.6497e-16	52.519	59.847	130.387	120.571	No	NQM1	Transaldolase of unknown function; transcription is repressed by Mot1p and induced by alpha-factor and during diauxic shift; NQM1 has a paralog, TAL1, that arose from the whole genome duplication sedoheptulose-7-phosphate:D-glyceraldehyde-3-phosphate transaldolase NQM1
snR191	-1.10952	7.60666e-07	5.01885e-06	8.995	10.779	21.919	22.29	No	snR191	- -
YAL062W	-1.11287	4.85191e-16	1.01165e-14	79.163	100.278	200.618	201.004	No	GDH3	NADP(+)-dependent glutamate dehydrogenase; synthesizes glutamate from ammonia and alpha-ketoglutarate; rate of alpha-ketoglutarate utilization differs from Gdh1p; expression regulated by nitrogen and carbon sources; GDH3 has a paralog, GDH1, that arose from the whole genome duplication glutamate dehydrogenase (NADP(+)) GDH3
YKL214C	-1.12049	3.73388e-08	3.08559e-07	19.915	14.784	38.202	39.881	No	YRA2	Member of the REF (RNA and export factor binding proteins) family; when overexpressed, can substitute for the function of Yra1p in export of poly(A)+ mRNA from the nucleus Yra2p
YIL164C	-1.12337	1.71772e-09	1.69145e-08	16.164	14.363	35.078	33.693	No	NIT1	Nitrilase; member of the nitrilase branch of the nitrilase superfamily; in closely related species and other S. cerevisiae strain backgrounds YIL164C and adjacent ORF, YIL165C, likely constitute a single ORF encoding a nitrilase gene Nit1p
YJL157C	-1.12385	8.10598e-12	1.08431e-10	19.667	19.35	44.586	43.426	No	FAR1	CDK inhibitor and nuclear anchor; during the cell cycle Far1p sequesters the GEF Cdc24p in the nucleus; phosphorylation by Cdc28p-Cln results in SCFCdc4 complex-mediated ubiquitin-dependent degradation, releasing Cdc24p for export and activation of GTPase Cdc42p; in response to pheromone, phosphorylation of Far1p by MAPK Fus3p results in association with, and inhibition of Cdc28p-Cln, as well as …
YHR054C	-1.12429	8.56125e-14	1.409e-12	77.778	60.212	159.293	152.113	No	YHR054C	hypothetical protein; partial duplicate of RSC30/YHR056C, truncated remnant of segmental duplication hypothetical protein
YDR380W	-1.13163	4.50169e-12	6.22062e-11	20.327	19.743	44.518	46.327	No	ARO10	Phenylpyruvate decarboxylase; catalyzes decarboxylation of phenylpyruvate to phenylacetaldehyde, which is the first specific step in the Ehrlich pathway; involved in protein N-terminal Met and Ala catabolism phenylpyruvate decarboxylase ARO10
YLR122C	-1.13184	1.93824e-08	1.65542e-07	15.66	12.81	33.371	31.197	No	YLR122C	hypothetical protein; conserved among S. cerevisiae strains; partially overlaps dubious ORF YLR123C hypothetical protein
YBR004C	-1.13248	4.24824e-20	1.25709e-18	46.907	47.318	109.35	104.607	No	GPI18	Functional ortholog of human PIG-V; PIG-V is a mannosyltransferase that transfers the second mannose in glycosylphosphatidylinositol biosynthesis; the authentic, non-tagged protein was localized to mitochondria GPI-anchor transamidase GPI18
YIR030C	-1.13275	0.000242602	0.00100099	6.941	4.65	13.931	12.393	No	DCG1	hypothetical protein; expression is sensitive to nitrogen catabolite repression and regulated by Dal80p; contains transmembrane domain Dcg1p
YOL159C	-1.13571	3.57213e-16	7.55563e-15	55.04	46.279	117.313	113.205	No	CSS3	hypothetical protein, secreted when constitutively expressed; SWAT-GFP, seamless-GFP and mCherry fusion proteins localize to the cell periphery, SWAT-GFP fusion also localizes to the extracellular region, and mCherry fusion also localizes to the vacuole; deletion mutants are viable and have elevated levels of Ty1 retrotransposition and Ty1 cDNA Css3p
YDR009W	-1.1359	2.78327e-05	0.000139259	5.923	6.166	14.406	13.038	Yes	GAL3	Transcriptional regulator; involved in activation of the GAL genes in response to galactose; forms a complex with Gal80p to relieve Gal80p inhibition of Gal4p; binds galactose and ATP but does not have galactokinase activity; GAL3 has a paralog, GAL1, that arose from the whole genome duplication transcriptional regulator GAL3
YBR255C-A	-1.13624	1.05365e-13	1.71386e-12	26.892	25.844	62.922	57.084	No	RCF3	hypothetical protein; may interact with respiratory chain complexes III (ubiquinol-cytochrome c reductase) or IV (cytochrome c oxidase); identified by sequence comparison with hemiascomycetous yeast species hypothetical protein
YEL068C	-1.1369	7.38935e-14	1.24052e-12	27.277	25.732	57.99	62.575	No	YEL068C	hypothetical protein; expressed at both mRNA and protein levels; SWAT-GFP and seamless-GFP fusion proteins localize to the endoplasmic reticulum and mCherry fusion protein localizes to the vacuole hypothetical protein
YCR001W	-1.13735	0.0207437	0.0474103	8.004	2.349	9.975	13.503	No	YCR001W	hypothetical protein; conserved among S. cerevisiae strains; YCR001W is not an essential gene hypothetical protein
YOR192C-C	-1.13788	4.81529e-05	0.000229	13.386	25.919	49.127	40.294	No	YOR192C-C	hypothetical protein; identified by expression profiling and mass spectrometry hypothetical protein
YOR388C	-1.13903	1.26791e-09	1.27203e-08	13.854	13.717	31.64	31.197	No	FDH1	NAD(+)-dependent formate dehydrogenase; may protect cells from exogenous formate formate dehydrogenase (NAD+)
YNL046W	-1.13952	1.02646e-14	1.88528e-13	61.935	51.632	138.307	120.649	No	YNL046W	hypothetical protein; expression depends on Swi5p; GFP-fusion protein localizes to the endoplasmic reticulum; deletion confers sensitivity to 4-(N-(S-glutathionylacetyl)amino) phenylarsenoxide (GSAO) hypothetical protein
YPR064W	-1.14219	1.96315e-05	0.000101969	7.39	11.518	22.819	20.345	No	YPR064W	hypothetical protein; conserved among S. cerevisiae strains; YPR064W is not an essential gene hypothetical protein
YOR376W	-1.14834	0.00570405	0.0158314	2.851	2.124	5.671	5.766	No	YOR376W	hypothetical protein; conserved among S. cerevisiae strains; YOR376W is not an essential gene hypothetical protein
YHL044W	-1.15015	0.00189294	0.00611058	6.106	3.266	10.187	11.248	No	YHL044W	Putative integral membrane protein; member of DUP240 gene family; green fluorescent protein (GFP)-fusion protein localizes to the plasma membrane in a punctate pattern DUP240 family protein
snR42	-1.15604	5.70519e-13	8.58549e-12	41.553	42.228	84.757	108.394	No	snR42	- -
YIL166C	-1.15806	2.7658e-06	1.67926e-05	8.646	7.121	18.668	17.806	No	YIL166C	Putative protein with similarity to allantoate permease; similar to the allantoate permease (Dal5p) subfamily of the major facilitator superfamily; mRNA expression is elevated by sulfur limitation; YIL166C is a non-essential gene hypothetical protein
YAR031W	-1.15911	5.04886e-06	2.92305e-05	11.681	8.187	21.325	24.502	No	PRM9	Pheromone-regulated protein; contains 3 predicted transmembrane segments and an FF sequence, a motif involved in COPII binding; member of DUP240 gene family; PRM9 has a paralog, PRM8, that arose from a segmental duplication pheromone-regulated DUP240 family protein PRM9
YDL239C	-1.16232	0.000164533	0.000706228	4.795	4.22	10.314	10.577	No	ADY3	Protein required for spore wall formation; subunit of the leading edge protein (LEP) complex (Ssp1-Ady3-Don1-Irc10) that forms a ring-like structure at the leading edge of the prospore membrane during meiosis II; mediates assembly of the LEP complex, formation of the ring-like structure via interaction with spindle pole body components and prospore membrane maturation; potentially phosphorylated …
YOR032C	-1.1671	1.7566e-09	1.72394e-08	12.506	12.913	30.196	28.813	Yes	HMS1	bHLH protein with similarity to myc-family transcription factors; overexpression confers hyperfilamentous growth and suppresses the pseudohyphal filamentation defect of a diploid mep1 mep2 homozygous null mutant Hms1p
YBR140C	-1.16954	2.58816e-07	1.89314e-06	9.591	8.973	20.281	22.858	No	IRA1	GTPase-activating protein; negatively regulates RAS by converting it from GTP- to the GDP-bound inactive form, required for reducing cAMP levels under nutrient limiting conditions, mediates membrane association of adenylate cyclase; mutations cause catalase T deficiency, defective glycogen synthesis and defective trehalose accumulation; IRA1 has a paralog, IRA2, that arose from the whole genome d…
YJL089W	-1.17077	3.06081e-05	0.000151977	5.245	5.82	12.318	13.572	Yes	SIP4	C6 zinc cluster transcriptional activator; binds to the carbon source-responsive element (CSRE) of gluconeogenic genes; involved in the positive regulation of gluconeogenesis; regulated by Snf1p protein kinase; localized to the nucleus Sip4p
YLR046C	-1.17594	7.16832e-18	1.74997e-16	38.344	35.987	90.071	83.668	No	YLR046C	Putative membrane protein; member of the fungal lipid-translocating exporter (LTE) family of proteins; transcription is activated by paralogous transcription factors Yrm1p and Yrr1p along with genes involved in multidrug resistance; YLR046C has a paralog, RTA1, that arose from the whole genome duplication hypothetical protein
YIL066C	-1.18029	8.53982e-05	0.000387867	4.887	4.463	10.985	10.973	No	RNR3	Minor isoform of large subunit of ribonucleotide-diphosphate reductase; the RNR complex catalyzes rate-limiting step in dNTP synthesis, regulated by DNA replication and DNA damage checkpoint pathways via localization of small subunits; RNR3 has a paralog, RNR1, that arose from the whole genome duplication ribonucleotide-diphosphate reductase subunit RNR3
YHR041C	-1.18216	1.06094e-20	3.23752e-19	45.816	46.729	113.179	104.297	No	SRB2	Subunit of the RNA polymerase II mediator complex; associates with core polymerase subunits to form the RNA polymerase II holoenzyme; general transcription factor involved in telomere maintenance Srb2p
YPL192C	-1.18315	5.042e-09	4.68163e-08	22.766	21.615	43.592	60.725	No	PRM3	Protein required for nuclear envelope fusion during karyogamy; pheromone-regulated; peripheral protein of the nuclear membrane; interacts with Kar5p at the spindle pole body pheromone-regulated protein PRM3
YLR112W	-1.19162	2.85678e-07	2.06641e-06	9.343	12.117	23.473	27.419	No	YLR112W	hypothetical protein; conserved across S. cerevisiae strains hypothetical protein
YIL114C	-1.1918	7.42835e-07	4.92338e-06	13.432	22.26	43.898	40.586	No	POR2	Putative mitochondrial porin (voltage-dependent anion channel); not required for mitochondrial membrane permeability or mitochondrial osmotic stability; POR2 has a paralog, POR1, that arose from the whole genome duplication putative porin POR2
YFL052W	-1.19755	0.000119829	0.000528275	4.869	4.201	9.992	11.532	Yes	ZNF1	Zinc cluster transcription factor that regulates respiratory growth; binds to promoters of genes involved in respiration, gluconeogenesis, and the glyoxylate shunt; required for normal carbon source utilization and stress response DNA-binding domain containing protein
YCL021W-A	-1.19772	8.7105e-12	1.16252e-10	26.736	21.353	54.9	59.373	No	YCL021W-A	hypothetical protein; SWAT-GFP and mCherry fusion proteins localize to the vacuole hypothetical protein
YAR033W	-1.20062	2.17509e-06	1.34999e-05	7.748	6.662	16.291	18.03	No	MST28	Putative integral membrane protein, involved in vesicle formation; forms complex with Mst27p; member of DUP240 gene family; binds COPI and COPII vesicles; MST28 has a paralog, MST27, that arose from a segmental duplication DUP240 family protein MST28
YJR005C-A	-1.20099	9.64875e-10	9.81459e-09	18.127	19.612	50.859	38.917	No	LSO1	Protein with a potential role in response to iron deprivation; transcription increases during iron deprivation and during treatment with 2-(6-benzyl-2-pyridyl)quinazoline (BPQ) and copper; regulated by Aft1p and, to a lesser extent, by Aft2p; originally identified as a syntenic homolog of an Ashbya gossypii gene; localizes to nucleus and cytoplasm, and nuclear localization is enhanced under iron-…
YEL057C	-1.20277	5.30042e-11	6.40313e-10	14.991	15.673	38.405	34.536	No	SDD1	hypothetical protein; overproduction suppresses lethality due to expression of the dominant PET9 allele AAC2-A128P; may have a role in telomere maintenance; target of UME6 regulation Sdd1p
YKR053C	-1.20973	7.03295e-14	1.18749e-12	24.811	21.68	54.476	56.843	No	YSR3	Dihydrosphingosine 1-phosphate phosphatase; membrane protein involved in sphingolipid metabolism; YSR3 has a paralog, LCB3, that arose from the whole genome duplication sphinganine kinase YSR3
YKL217W	-1.21017	2.38874e-09	2.30951e-08	11.461	11.219	28.099	26.257	No	JEN1	Monocarboxylate/proton symporter of the plasma membrane; transport activity is dependent on the pH gradient across the membrane; mediates high-affinity uptake of carbon sources lactate, pyuvate, and acetate, and also of the micronutrient selenite, whose structure mimics that of monocarboxylates; expression and localization are tightly regulated, with transcription repression, mRNA degradation, an…
YER067W	-1.21573	1.98117e-12	2.84501e-11	227.476	330.945	735.884	605.731	No	RGI1	hypothetical protein; involved in energy metabolism under respiratory conditions; protein abundance is increased upon intracellular iron depletion or in response to DNA replication stress; RGI1 has a paralog, RGI2, that arose from the whole genome duplication Rgi1p
YOL081W	-1.21823	1.38545e-08	1.20614e-07	10.076	10.283	23.167	25.792	No	IRA2	GTPase-activating protein; negatively regulates RAS by converting it from the GTP- to the GDP-bound inactive form, required for reducing cAMP levels under nutrient limiting conditions; IRA2 has a paralog, IRA1, that arose from the whole genome duplication; defects in human homolog NF1 are associated with neurofibromatosis Ras GTPase activating protein IRA2
[truncated: 147 more rows]

## Sheet: L214V vs. WT
Gene ID	log2(Fold_change)	p-value	FDR p-value correction	mRNA expression level at thermal stress				YEASTRACT 2019 TF	Gene	Gene Function
[truncated: 150 more rows]
