# Supplementary material for: Stress tolerance enhancement via SPT15 base editing in Saccharomyces cerevisiae
Source: Biotechnol Biofuels. 2021 Jul 6;14:155. doi: 10.1186/s13068-021-02005-w (PMC8259078; doi:10.1186/s13068-021-02005-w)
Supplement: Supplementary file 8 — Additional file 8: Dataset S4. GO Biological Process analysis of SDEGs. [file 13068_2021_2005_MOESM8_ESM.xlsx]

## Sheet: Dataset S4
Culture condition	Pairwise comparison	Significantly differential gene expression	GO Biological Process	p-value	In Category from Cluster	k	f
Normal condition	A140G vs. WT	Up-regulated	No significant enrichment
		Down-regulated	lysine biosynthetic process [GO:0009085]	2.582e-06	LYS2 LYS12 LYS1 LYS9	4	8
	P169A vs. WT	Up-regulated	ribosome biogenesis [GO:0042254]	<1e-14	SPB1 DBP10 NOP6 MAK21 SSF2 ESF1 UTP5 UTP6 NSA2 LCP5 CGR1 PXR1 BCD1 SSF1 IMP3 ALB1 RRP14 EBP2 DBP7 DRS1 SOF1 CBF5 NOP56 UTP14 UTP15 TMA23 KRI1 DBP6 NOG2 ESF2 RCL1 NOP12 BUD21 RRS1 NOP58 NOG1 NOP53 RSA1 RRP15	39	170
			rRNA processing [GO:0006364]	<1e-14	SPB1 DBP10 NOP6 BFR2 ESF1 UTP5 UTP6 NSA2 LCP5 CGR1 MTR3 PXR1 IMP3 RRP14 EBP2 DBP7 DRS1 SOF1 RMP1 CBF5 PWP1 NOP56 LSM3 UTP14 UTP15 JJJ1 POP3 KRI1 DBP6 ESF2 NOP12 BUD21 NOP58 NOG1 NOP53 RRP15	36	195
		Down-regulated	oxidation-reduction process [GO:0055114]	6.008e-10	BDH2 GDH3 BNA4 LYS2 ADH5 PDB1 HIS4 PST2 HOM2 PDA1 ADH4 TDH3 GND1 IMD2 CBR1 LYS12 TDH1 TDH2 HOM6 YKL107W JLP1 GCV2 SCS7 IDH1 LYS9 ADH1 IDH2 FDH1 YPR127W	29	272
			glycolysis [GO:0006096]	2.571e-09	PGI1 PDB1 TPI1 PDA1 TDH3 ENO2 TDH1 TDH2 FBA1 GPM1	10	28
			gluconeogenesis [GO:0006094]	1.388e-08	PGI1 TPI1 TDH3 ENO2 TDH1 TDH2 FBA1 GPM1	8	18
			metabolic process [GO:0008152]	3.32e-08	BDH2 GDH3 BNA4 LYS2 ADH5 PDB1 ILV6 HIS4 LYS21 LYS20 TPI1 DNF2 HOM2 DPP1 PDA1 GSY1 LEU1 TRP5 ADE5,7 TDH3 GND1 IMD2 TDH1 TDH2 HOM6 FBA1 YKL107W GPM1 BNA5 ADE17 IDH1 LYS9 IDH2 FDH1	34	425
			lysine biosynthetic process [GO:0009085]	9.774e-07	LYS2 LYS21 LYS20 LYS12 LYS9	5	8
			translational elongation [GO:0006414]	1.73e-06	RPP1A RPP1B RPP2B RPP0 RPP2A EFT1 CAM1	7	22
			cellular amino acid biosynthetic process [GO:0008652]	3.873e-06	LYS2 ILV6 HIS4 LYS21 LYS20 HOM2 LEU1 TRP5 THR1 LYS12 HOM6 LYS9 ARG1	13	98
	R238K vs. WT	Up-regulated	methionine biosynthetic process [GO:0009086]	7.638e-13	MET8 MET6 MET10 MET13 STR3 MET30 MET28 MET3 MET5 MET14 MET1 MHT1 ADI1 MET4 MET2 MET22 MET16	17	31
			cysteine biosynthetic process [GO:0019344]	8.751e-11	CYS3 MET10 CYS4 MET30 MET28 MET3 MET5 MET14 MET4 MET16	10	12
			sulfate assimilation [GO:0000103]	4.87e-08	MET8 MET10 MET3 MET5 MET14 MET1 MET22 MET16	8	11
			protein refolding [GO:0042026]	1.727e-07	SSA1 SSE2 HSP78 MDJ1 CPR6 HSP60 HSC82 SSE1 HSP82	9	16
			regulation of transcription, DNA-dependent [GO:0006355]	2.186e-07	RXT2 CYC8 PAF1 HMLALPHA2 MATALPHA2 MED2 RPN4 BDF2 SWI5 MET32 HDA2 SUM1 ESC2 IES1 GAT1 MIG1 MGA1 MET30 XBP1 MET28 TFA1 IXR1 HAP4 DAL80 YAP1 SPT5 TAF11 MFT1 POB3 WAR1 TAF13 ARG81 TAF8 TAF4 MAC1 RSF1 ARP9 MSN2 SUB1 MCM1 IOC4 MOT3 RCO1 NPL6 MED11 MSS11 HOT1 RGM1 ESC1 TAF7 MTF1 TRI1 SAP30 RRN9 MET4 EAF7 GAL11 LEO1 TOA1 TYE7 NDD1 USV1 CCL1 NUT2	64	507
			transcription, DNA-dependent [GO:0006351]	1e-06	RXT2 CYC8 PAF1 HMLALPHA2 MATALPHA2 MED2 RPN4 BDF2 SWI5 MET32 HDA2 SUM1 ESC2 IES1 GAT1 MIG1 MGA1 MET30 XBP1 MET28 TFA1 IXR1 HAP4 DAL80 YAP1 SPT5 TAF11 MFT1 POB3 WAR1 TAF13 ARG81 CTK3 TAF8 TAF4 MAC1 RSF1 ARP9 MSN2 SUB1 MCM1 IOC4 MOT3 RCO1 NPL6 MED11 MSS11 HOT1 RGM1 ESC1 TAF7 MTF1 TRI1 SAP30 RRN9 MET4 EAF7 GAL11 LEO1 TOA1 TYE7 NDD1 USV1 CCL1 NUT2	65	540
			response to stress [GO:0006950]	1.889e-06	SSA1 SSE2 HSP42 HSP78 SSA4 HSP12 MDJ1 MTL1 GRE3 XBP1 KAR2 HSP150 MNN4 HSP104 HSP60 TSL1 MSN2 RIM11 DDR48 HSC82 HOR7 MET22 ZEO1 STI1 HSP33 SSE1 HSP82	27	152
			protein folding [GO:0006457]	3.419e-06	SSA1 SSE2 SSA4 MDJ1 ERJ5 JEM1 CPR6 HSP60 TSA1 FPR3 GIM5 ERO1 HLJ1 HSC82 ROT1 SCJ1 SIS1 STI1 SSE1 HSP82	20	96
			cellular amino acid biosynthetic process [GO:0008652]	4.779e-06	CYS3 MET8 MET6 MET10 STR3 CYS4 MET30 SER33 MET28 MET3 MET5 MET14 MET1 MHT1 ADI1 ARG7 ILV2 MET4 MET2 MET16	20	98
		Down-regulated	translation [GO:0006412]	<1e-14	RPL19B RPS8A RPL23A RPL32 RPL4A RPS11B RPL19A RPS9B RPL21A RPS14A RPS29B RPL31A RPP1A RPL13A RPS16B RPP1B SSB1 RPL4B RPS13 RPP2B RPL12B RPS17B RPS18A RPL37B RPL12A RPL34A RPS8B RPL23B RPS26B RPL22B RPL2A RPL29 RPL30 RPL24A RPL7A RPL28 RPS2 RPL1B RPL9A RPS26A RPS25A RPL26B RPS0A RPS20 RPS27B RPL42B RPL2B RPL34B RPS24B RPL16A RPL40A RPS21B RPL17B RPL39 RPS22A RPS14B ANB1 RPL43B RPS5 RPS4A RPL14A RP…	99	318
			rRNA export from nucleus [GO:0006407]	8.29e-09	RPS18A RPS26B RPS2 RPS26A RPS0A RPS5 RPS0B RPS3 RPS19B RPS15 RPS19A RPS28A	12	27
			'de novo' IMP biosynthetic process [GO:0006189]	6.221e-08	ADE1 ADE8 ADE5,7 ADE6 ADE13 ADE17 ADE2	7	9
			purine nucleotide biosynthetic process [GO:0006164]	1.843e-07	ADE1 ADE8 ADE5,7 ADE6 IMD2 ADE13 IMD3 ADE17 ADE2	9	18
			ribosomal small subunit assembly [GO:0000028]	2.376e-07	RPS11B RPS14A RPS17B RPS0A RPS27B RPS14B RPS0B RPS31	8	14
			translational elongation [GO:0006414]	1.535e-06	RPP1A RPP1B RPP2B ANB1 STM1 RPP0 RPP2A EFT1 TEF1	9	22
	S118L vs. WT	Up-regulated	ribosomal large subunit biogenesis [GO:0042273]	<1e-14	MAK16 MAK5 REI1 YDL063C RLI1 ARX1 PUF6 NOP16 NSA2 LOC1 NSA1 PRP43 NOP7 TIF4631 SDA1 CIC1 ALB1 MRT4 MAK11 RRP14 RIX7 RLP24 ERB1 RLP7 NOP15 JJJ1 NOP8 YTM1 RRS1 NOG1	30	37
			endonucleolytic cleavage to generate mature 5'-end of SSU-rRNA from (SSU-rRNA, 5.8S rRNA, LSU-rRNA) [GO:0000472]	<1e-14	PWP2 NOP14 SAS10 UTP6 UTP7 LOC1 DBP8 NOP9 UTP18 MPP10 UTP11 FCF2 DIP2 UTP13 UTP14 RRP5 ESF2 RCL1 UTP23 BUD21 PNO1 NOP58 MRD1	23	29
			endonucleolytic cleavage in 5'-ETS of tricistronic rRNA transcript (SSU-rRNA, 5.8S rRNA, LSU-rRNA) [GO:0000480]	<1e-14	PWP2 NOP14 SAS10 UTP6 UTP7 LOC1 DBP8 NOP9 UTP18 MPP10 UTP11 FCF2 DIP2 UTP13 UTP14 RRP5 ESF2 RCL1 UTP23 NOP58 MRD1	21	27
			ribosome biogenesis [GO:0042254]	<1e-14	MAK5 ENP1 REI1 RRP7 SPB1 KRR1 PWP2 DBP10 TSR1 NOP14 SAS10 FAP7 NHP2 NOP6 FAL1 MAK21 RLI1 SSF2 UTP4 ESF1 UTP5 RRP17 UTP6 NOP16 NUG1 UTP7 NSA2 LCP5 SPB4 LOC1 CGR1 DBP3 NSA1 ROK1 SLX9 NOP7 UTP8 ENP2 SDA1 PXR1 BCD1 CIC1 RRP3 SSF1 IPI1 RPF1 GAR1 IMP3 DBP8 UTP9 RIX1 FAF1 UTP25 NOP9 HCA4 UTP18 ALB1 MPP10 URB2 MRT4 URB1 MAK11 DHR2 RRP14 UTP11 EBP2 DBP7 UTP30 DRS1 SOF1 RIX7 NOC3 RLP24 FCF2 DIP2 CBF5 NOP56…	126	170
			endonucleolytic cleavage in ITS1 to separate SSU-rRNA from 5.8S rRNA and LSU-rRNA from tricistronic rRNA transcript (SSU-rRNA, 5.8S rRNA, LSU-rRNA) [GO:0000447]	<1e-14	ENP1 KRR1 BUD23 PWP2 NOP14 SAS10 UTP6 UTP7 LOC1 DBP8 NOP9 UTP18 MPP10 UTP11 FCF2 DIP2 UTP13 UTP14 RRP5 KRI1 ESF2 RCL1 UTP23 BUD21 PNO1 RRS1 NOP58 MRD1	28	40
			ribosomal large subunit assembly [GO:0000027]	<1e-14	RSA4 DBP10 MAK21 SSF2 SPB4 DBP3 LSG1 SSF1 IPI1 RPF1 RIX1 SQT1 YVH1 MRT4 MAK11 DBP7 RPF2 DRS1 MDN1 RSA3 DBP9 IPI3 DBP6 BRX1 REX4 RSA1	26	38
			rRNA processing [GO:0006364]	<1e-14	MAK5 ENP1 RRP7 SPB1 KRR1 RRP43 PWP2 DBP10 TSR1 NOP14 SAS10 FAP7 NHP2 NOP6 FAL1 RRP8 RLI1 BFR2 UTP4 ESF1 UTP5 RRP17 UTP6 NOP16 NUG1 UTP7 LSM4 NSA2 LCP5 SPB4 CGR1 DBP3 NSA1 PRP43 ROK1 SLX9 NOP7 UTP8 ENP2 MTR3 NSR1 EFG1 PXR1 ZUO1 SSZ1 RRP3 RRP4 LRP1 IPI1 RPF1 GAR1 IMP3 DBP8 UTP9 RIX1 UTP25 NOP9 HCA4 MTR4 UTP18 MPP10 LSM8 URB2 MRT4 URB1 DHR2 RRP14 UTP11 EBP2 DBP7 UTP30 DRS1 SOF1 GRC3 NOC3 FCF2 FYV7 M…	126	195
			maturation of SSU-rRNA from tricistronic rRNA transcript (SSU-rRNA, 5.8S rRNA, LSU-rRNA) [GO:0000462]	<1e-14	PWP2 NOP14 SAS10 FAP7 FAL1 UTP4 UTP5 UTP6 UTP7 PRP43 SLX9 NOP7 UTP8 YGR251W EFG1 RRP3 UTP9 FAF1 UTP25 DHR2 SOF1 FYV7 DIP2 UTP13 TSR2 UTP15 ECM16 RIO2 NOB1 BUD21 RIO1 RRP36 RRP12 NAN1	34	60
			transcription, DNA-dependent [GO:0006351]	5.205e-13	RTG3 RXT2 CKS1 RPB5 HPC2 THI2 PAF1 ADF1 RSC6 TUP1 RDS1 MED2 BDF2 RPC53 FAP7 INO2 HPR1 TAF12 SWI5 RVB1 HDA2 SUM1 UTP4 UTP5 DOT1 EAF5 IES1 PHO4 RAD6 SGF73 MIG2 RTF1 UTP8 ELP2 SMI1 BRF1 OPI1 RSC30 STE12 RPC10 UTP9 SKN7 NOT3 RRT14 ASG1 FKH1 YAP5 DAL81 RPC17 ZAP1 ASF1 RPA34 CBF1 RPA12 TFA1 IXR1 HAP4 KTI12 RRN3 RPC37 DAL80 MSA2 BAS1 BRE2 IFH1 SFH1 SWC7 BDF1 TAF11 RRN11 MFT1 SOK2 SUB1 MCM1 UTP15 MED11 M…	112	540
			ribosomal small subunit biogenesis [GO:0042274]	8.032e-11	KRR1 NOP14 NOP6 ENP2 UTP25 RRP14 LTV1 UTP30 CMS1 SGD1 UTP21 BUD22 TMA23 KRE33 NOB1 RRP36	16	24
			maturation of LSU-rRNA from tricistronic rRNA transcript (SSU-rRNA, 5.8S rRNA, LSU-rRNA) [GO:0000463]	1.108e-09	MAK16 MAK5 SPB1 NSA2 PRP43 RPF1 URB1 MAK11 RPF2 RLP7 NOP12 NOP53 RRP15	13	18
			maturation of 5.8S rRNA from tricistronic rRNA transcript (SSU-rRNA, 5.8S rRNA, LSU-rRNA) [GO:0000466]	5.225e-09	MAK16 MAK5 SPB1 NSA2 PRP43 RPF1 URB1 MAK11 RPF2 RMP1 RRP15	11	14
			methylation [GO:0032259]	1.354e-07	NCL1 HMT1 TRM7 SPB1 KAR4 BUD23 TRM8 RRP8 TRM1 RKM2 DOT1 RMT2 MET6 TRM5 SEE1 HPM1 GCD14 TRM2 NOP2 TRM11 PPM2 ABP140 TRM44 DIM1	24	71
			regulation of transcription, DNA-dependent [GO:0006355]	2.081e-07	RTG3 RXT2 HPC2 THI2 PAF1 ADF1 RSC6 TUP1 RDS1 MED2 BDF2 FAP7 INO2 HPR1 TAF12 SWI5 RVB1 HDA2 SUM1 DOT1 EAF5 ARG5,6 IES1 PHO4 RAD6 SGF73 MIG2 RTF1 ELP2 SMI1 BRF1 OPI1 RSC30 STE12 SKN7 NOT3 RRT14 ASG1 FKH1 YAP5 DAL81 ZAP1 ASF1 CBF1 TFA1 IXR1 HAP4 KTI12 RRN3 DAL80 MSA2 BAS1 MDN1 IFH1 SFH1 SWC7 BDF1 TAF11 RRN11 MFT1 SOK2 SUB1 MCM1 MED11 MSS11 TAF7 FAP1 ARP5 TOP2 MET4 EAF7 YNR063W YAP7 GAL11 RTG1 MED7 C…	91	507
			ribosomal large subunit export from nucleus [GO:0000055]	9.04e-07	ECM1 BCP1 NUG1 SDA1 RPF1 NMD3 NUP85 RIX7 NOG2 RRS1 NOP53 MEX67	12	23
			tRNA processing [GO:0008033]	1.62e-06	NCL1 TRM7 LHP1 TRM8 TRM1 STP1 LSM4 DEG1 SUA5 TRM5 URM1 TRL1 GCD14 LSM8 TRM2 DUS1 NCS2 SMM1 TRM11 PPM2 PUS7 TRM44 TYW1 PUS1	24	80
		Down-regulated	biological_process [GO:0008150]	<1e-14	FUN19 BDH2 YAL067W-A PAU7 YAR023C UIP3 YAR029W YAR068W YBL029C-A YBL039W-B YBL044W MOH1 YBL086C YBL113C YBR013C RFS1 YBR053C YRO2 YBR056W YBR063C RTC2 GDT1 AIM4 YBR219C OM14 YBR230W-A YBR255C-A YBR284W YCL001W-A YCL001W-B YCL002C YCL021W-A YCL048W-A YCP4 YCR007C YCR023C YCR050C HMRA2 YCR099C YCR100C YET3 YDL186W RTN2 YDL206W YDL241W FMP16 YDR119W-A YDR182W-A YDR222W YDR336W YDR366C YDR381C-A YDR3…	248	1203
			response to stress [GO:0006950]	9.093e-11	SSA1 FRT2 PAU7 SSA3 HSP26 TPS1 SSE2 HSP30 GPD1 MRK1 FMP45 AAD4 NTH1 UBC5 TPS2 HSP42 HSP31 TIR1 SSA4 HSP12 PAU5 DAK2 CTT1 RTA1 FMP43 PAU12 PAU13 GRE3 XBP1 PAU15 PAU17 HSP104 PAU23 YLR046C TSL1 TPS3 DDR2 IRA2 TIR4 PAU21 GRE1 HSP82 PAU22 HAL1 ATH1	45	152
			carbohydrate metabolic process [GO:0005975]	4.685e-09	GAL7 GAL1 YBR056W MAL32 GLK1 GPD1 EMI2 GLC3 HXK1 ALG13 NQM1 XKS1 SOL4 IMA1 MAL12 GUT1 SGA1 SUC2 IMA5 XYL2 GAS2 FBP1 YLR446W YMR085W PGM2 CAT8 YNR071C GAL4 ATH1 GPH1 GDB1	31	94
			glycogen biosynthetic process [GO:0005978]	3.025e-07	GLC3 GSY1 GLG2 UGP1 GLG1 GSY2 PGM2 GAC1 GDB1	9	12
	L214V vs. WT	Up-regulated	No significant enrichment
		Down-regulated	No significant enrichment
Hyperosmotic stress	A140G vs. WT	Up-regulated	protein folding [GO:0006457]	2.154e-10	SSA1 SSE2 AHA1 SSA4 MDJ1 SSA2 CPR6 HSP60 GSF2 FPR3 GIM5 ERO1 CIN4 HLJ1 HSC82 ROT1 SIS1 APJ1 HCH1 HSP10 STI1 SSE1 HSP82	23	96
			protein refolding [GO:0042026]	5.867e-10	SSA1 SSE2 HSP78 MDJ1 CPR6 HSP60 HSC82 HSP10 SSE1 HSP82	10	16
			methionine biosynthetic process [GO:0009086]	1.017e-09	MET10 MET13 STR3 MET28 MET3 MET14 MET1 YLL058W MHT1 ADI1 MET2 MET22 MET16	13	31
			response to stress [GO:0006950]	1.283e-07	SSA1 PAU7 SSE2 ARO3 HSP42 AHA1 HSP78 SSA4 MDJ1 TOS3 KAR2 MNN4 SSA2 HSP104 HSP60 TRM9 TSL1 RIM11 DDR48 HSC82 HCH1 MET22 STI1 SSE1 HSP82	25	152
			cellular amino acid biosynthetic process [GO:0008652]	3.176e-07	CYS3 ARO3 HOM3 MET10 STR3 CYS4 BAT1 MET28 MET3 MET14 MET1 YLL058W MHT1 ADI1 ARG7 ILV2 MET2 ASN1 MET16	19	98
			cysteine biosynthetic process [GO:0019344]	5.064e-07	CYS3 MET10 CYS4 MET28 MET3 MET14 MET16	7	12
			'de novo' protein folding [GO:0006458]	1.851e-06	MDJ1 HSP60 HSC82 ROT1 HSP82	5	6
		Down-regulated	cell cycle [GO:0007049]	1.811e-10	ALK2 SHE1 STU1 KIP1 CDC28 BUD3 MCD1 CDC9 SCC2 YHP1 DMC1 SMC1 ECO1 ALK1 DBF2 CLB1 CLB6 IRR1 AIM20 SMC3 FAR1 SWE1 CDC6 BUD4 SLD2 RAX2 CDC45 MMR1 YCS4 YOX1 HOF1 CLN1 TOF1 PCL1 SGO1 NUD1 RAD53 KIP2 IPL1 CLN2 ACM1 CLB2 CLB5	43	316
			cellular cell wall organization [GO:0007047]	2.212e-08	CHS3 CHS2 ECM33 SHC1 CRH1 WSC4 ECM12 CIS3 MCD4 PAU23 CCW12 YLR194C EXG1 FKS1 SCW10 WSC2 HPF1 TIR4 SRL1	19	89
			cell division [GO:0051301]	6.164e-08	SHE1 STU1 KIP1 CDC28 MCD1 CDC9 SMC1 CLB1 CLB6 IRR1 SMC3 FAR1 SWE1 CDC6 BUD4 RAX2 MMR1 YCS4 HOF1 CLN1 PCL1 SGO1 NUD1 KIP2 CLN2 ACM1 CLB2 CLB5	28	190
			DNA replication [GO:0006260]	2.973e-07	RFA1 POL12 POL30 POL3 CDC9 RNR1 ECO1 RNR3 CDC6 PRI2 SLD2 RAD27 CDC45 POL1 TOF1 CTF4	16	75
			regulation of cyclin-dependent protein kinase activity [GO:0000079]	1.783e-06	CLB1 CLB6 SWE1 CLN1 PCL1 CLN2 CLB2 CLB5	8	20
			mitosis [GO:0007067]	3.283e-06	ALK2 SHE1 STU1 KIP1 CDC28 MCD1 SMC1 ALK1 CLB1 IRR1 HOP1 SMC3 SWE1 YCS4 HOF1 SGO1 NUD1 KIP2 ACM1 CLB2	20	132
	P169A vs. WT	Up-regulated	biological_process [GO:0008150]	3.639e-06	YAL065C YAR023C YBL028C YBL112C YBL113C YBR013C YBR071W YBR090C PAR32 YDL211C YDR034W-B ALT2 PAU2 YEL073C YEL075C YER034W IES5 YER137C YER175W-A YFL066C FMP37 YGL242C YGR146C-A YGR153W YGR169C-A YHL018W CRP1 CRG1 YHR214C-E YIL089W YIR042C SET4 YJL107C YJL118W KDX1 PRY2 PAU17 YLR030W YLR042C YLR157W-D RRT15 NKP2 TMA10 YLR361C-A YLR363W-A BLS1 YLR455W YML053C YMR001C-A AIM34 YMR118C YMR144W CTL1 YN…	67	1203
		Down-regulated	No significant enrichment
	R238K vs. WT	Up-regulated	protein refolding [GO:0042026]	2.193e-09	SSA1 SSE2 HSP78 MDJ1 CPR6 HSP60 HSC82 YDJ1 HSP10 HSP82	10	16
			protein folding [GO:0006457]	3.056e-09	SSA1 SSE2 AHA1 SSA4 MDJ1 FMO1 SSA2 CPR6 HSP60 GSF2 GIM5 ERO1 CIN4 HLJ1 HSC82 SCJ1 SIS1 YDJ1 APJ1 HCH1 HSP10 STI1 HSP82	23	96
			methionine biosynthetic process [GO:0009086]	5.287e-09	MET10 STR3 MET28 MET3 MET5 MET14 MET1 YLL058W MHT1 YML082W ADI1 MET22 MET16	13	31
			cellular amino acid biosynthetic process [GO:0008652]	1.214e-07	HIS4 MET10 STR3 ASN2 YHR033W MET28 ARG2 MET3 CPA2 MET5 MET14 MET1 YLL058W MHT1 YML082W YML096W ADI1 ARG7 ILV2 LEU9 MET16	21	98
			sulfate assimilation [GO:0000103]	5.541e-07	MET10 MET3 MET5 MET14 MET1 MET22 MET16	7	11
			'de novo' protein folding [GO:0006458]	3.613e-06	MDJ1 HSP60 HSC82 YDJ1 HSP82	5	6
			transmembrane transport [GO:0055085]	3.958e-06	SEO1 SUL1 AGP1 GGC1 GNP1 SIT1 MUP3 ARN2 YHK8 QDR2 GAP1 GEX2 YCT1 MMP1 PER33 SUL2 YML018C NDC1 NUP188 ATR1 HXT2 NUP116 AAC1 POM152 NUP53 YMR166C ZRC1 GFD1 YMR279C ATM1 FET4 ESBP6 MEP2 BIO5 MCH4 ENB1 YOL162W YOL163W	38	303
		Down-regulated	cell cycle [GO:0007049]	1.58e-09	ALK2 SHE1 CDC28 BUD3 KCC4 MCD1 CWC2 SPR28 YHP1 SMC1 ALK1 DBF2 CLB1 RSR1 IRR1 AIM20 FAR1 SWE1 BFA1 BUD4 SLD2 RAX2 CDC45 MMR1 YOX1 HOF1 CLN1 CNM67 PCL1 MSA1 SGO1 RAD53 KIP2 IPL1 CLN2 ACM1 CLB2	37	316
			cellular cell wall organization [GO:0007047]	4.899e-08	CHS2 ECM33 UTR2 CRH1 SCW4 WSC4 CIS3 HSP150 PIR3 MCD4 YLR194C EXG1 SCW10 CHS1 WSC2 TIR4 SRL1	17	89
			cell division [GO:0051301]	3.588e-07	SHE1 CDC28 KCC4 MCD1 SPR28 SMC1 CLB1 RSR1 IRR1 FAR1 SWE1 BFA1 BUD4 RAX2 MMR1 HOF1 CLN1 CNM67 PCL1 SGO1 KIP2 CLN2 ACM1 CLB2	24	190
			fungal-type cell wall organization [GO:0031505]	5.201e-07	ECM33 SPS22 PST1 SED1 SPR28 UTR2 CRH1 IRR1 SIM1 CIS3 HSP150 CWP1 CWP2 PIR3 YLR194C EXG1 WSC2 SRL1 CSR2	19	128
	S118L vs. WT	Up-regulated	translation [GO:0006412]	1.965e-14	SSA1 FMT1 RPL23A RPS11B RPS9B RPL21A RPS14A RPS29B RPP1A RPS16B RPP1B DTD1 RPS13 RPS18A RPL37B HYP2 RPS26B RPL29 RPL30 RPL7A RPS2 RPL1B RPL9A RPS25A RPL26B TYS1 RPL14B RPS27B RPL42B RPL2B RPL16A RPL40A RPS21B RPL39 RPS22A RPL43B RPS5 RPL14A TEF4 RPS21A RPL40B RPS0B RPL22A RPS31 RPL37A RPS28B RPL38 RPP0 RPS22B RPS29A RPL31B RPS18B RPS16A RPS10B RPS3 RPL18B RPP2A RPS15 RPL18A RPL25 RPS28A RPS10A RP…	68	318
			posttranslational protein targeting to membrane, translocation [GO:0031204]	1.312e-08	SEC66 SSS1 SBH1 KAR2 LHS1 SEC72 SEC61 SEC62	8	9
			rRNA export from nucleus [GO:0006407]	3.374e-07	RPS18A RPS26B RPS2 RPS5 RPS0B RPS28B RPS18B RPS10B RPS3 RPS15 RPS28A RPS10A	12	27
			SRP-dependent cotranslational protein targeting to membrane, translocation [GO:0006616]	1.926e-06	SSA1 SSS1 SBH1 KAR2 SSA2 SEC61 SIL1	7	10
		Down-regulated	cellular amino acid biosynthetic process [GO:0008652]	<1e-14	MET8 HIS7 HIS4 LYS21 LYS20 LYS14 ARO3 HOM3 ARG5,6 MET6 MET10 IRC7 LEU1 TRP5 STR3 CYS4 ADE3 ARG4 MET30 SER33 HIS5 MET28 LYS1 ARG2 ARG3 MET3 CPA2 STR2 MET5 BAT2 MET14 TRP3 MET1 YLL058W ILV2 MET2 ORT1 HIS3 CPA1 ASN1 MET16	41	98
			rRNA processing [GO:0006364]	2.575e-11	MAK5 POP4 SPB1 TSR1 SAS10 FAL1 BFR2 UTP4 ESF1 UTP6 SNM1 LCP5 DBP3 POP6 SLX9 NSR1 RRP4 DBP8 UTP9 RIX1 UTP25 HCA4 DHR2 RRP14 EBP2 DRS1 FCF2 REX3 UTP13 UTP14 UTP15 ECM16 RNT1 NOP2 NAF1 IPI3 POP1 JJJ1 POP3 KRI1 RRP36 NOP4 NOG1 NAN1 NOP53 BMS1 MRD1	47	195
			ribosome biogenesis [GO:0042254]	3.496e-11	MAK5 REI1 SPB1 TSR1 SAS10 FAL1 UTP4 ESF1 UTP6 LCP5 DBP3 SLX9 BCD1 SSF1 DBP8 UTP9 RIX1 UTP25 HCA4 DHR2 RRP14 EBP2 DRS1 FCF2 UTP13 UTP14 UTP15 ECM16 NOP2 NAF1 IPI3 KRI1 NOG2 RCL1 NOB1 RIO1 RRP36 RRP12 NOP4 NOG1 NAN1 NOP53 BMS1	43	170
			methionine biosynthetic process [GO:0009086]	4.774e-11	MET8 MET6 MET10 IRC7 STR3 ADE3 MET30 MET28 MET3 STR2 MET5 MET14 MET1 YLL058W MET2 MET22 MET16	17	31
			sulfate assimilation [GO:0000103]	3.586e-07	MET8 MET10 MET3 MET5 MET14 MET1 MET22 MET16	8	11
			pyridoxine metabolic process [GO:0008614]	3.831e-07	SNZ3 SNO3 SNO1 SNZ1 SNZ2 SNO2	6	6
			cysteine biosynthetic process [GO:0019344]	9.952e-07	MET10 CYS4 MET30 MET28 MET3 MET5 MET14 MET16	8	12
			sulfur compound metabolic process [GO:0006790]	2.487e-06	IRC7 YHR112C OPT1 STR2 YLL058W MET22	6	7
			thiamine biosynthetic process [GO:0009228]	3.003e-06	THI2 SNZ3 SNO3 THI4 SNO1 SNZ1 SNZ2 SNO2 THI20	9	17
			arginine biosynthetic process [GO:0006526]	3.093e-06	ARG5,6 ARG4 ARG2 ARG3 CPA2 ORT1 CPA1	7	10
	L214V vs. WT	Up-regulated	iron ion homeostasis [GO:0055072]	7.69e-11	SIT1 FTR1 ARN1 ARN2 FET3 ENB1 FIT2 FIT3	8	26
			siderophore transport [GO:0015891]	4.329e-09	SIT1 ARN1 ARN2 FIT2 FIT3	5	8
		Down-regulated	biological_process [GO:0008150]	1.363e-09	YAL067W-A YAR064W YAR066W YBL039W-B YBL086C YBR200W-A HMRA2 YCR099C YCR100C RTN2 YDR042C FMP16 YDR182W-A YDR246W-A YEL057C YEL075C YER187W YFL068W IGD1 YGL015C ARI1 YGL262W COS12 YGR121W-A PAU12 YHR210C YHR213W YHR214C-D YHR214C-E YIL169C YIR014W IRC24 YJL107C PRM10 YJL163C REE1 YJL225C FMP46 VBA5 PAU18 YLL066C YLL067C YLR132C YLR460C PAU4 YLR462W YET2 YMR144W YMR175W-A GAS3 ERR3 YNR014W YNR073C …	72	1203
Thermal stress	A140G vs. WT	Up-regulated	No significant enrichment
		Down-regulated	biological_process [GO:0008150]	5.957e-10	YAL018C YAL067W-A YAR068W YBL044W YBR284W PAU24 YCL021W-A YCR050C HMRA2 PAU3 YDL218W YDL241W EHD3 YDR182W-A YDR366C YDR374C MTC7 UTR5 YEL057C DSF1 YEL073C PAU5 YGL081W YGL138C YGL230C VEL1 YGL258W-A YGR035C YGR066C PAU12 YHL044W PAU13 YHR022C YHR054C YHR210C YHR212W-A YHR213W-A YHR214C-E TIR3 YIL169C PAU15 YJL027C YJL043W ICS3 YJL213W REE1 YJL218W YJR005C-A YJR149W KDX1 YKR005C YLL053C YLL056C YL…	77	1203
			response to stress [GO:0006950]	4.527e-07	HSP26 PAU24 PAU3 AAD4 TIR1 PAU5 DAK2 YHB1 PAU12 PAU13 TIR3 PAU15 DAN1 MSN4 PAU23 PAU4 PAU20 TIR4 TIR2	19	152
	P169A vs. WT	Up-regulated	biological_process [GO:0008150]	<1e-14	YAL064W YAL065C YAR023C YAR064W YBL008W-A YBL112C YBL113C YBR197C COS2 YCL001W-A YCL001W-B YCR101C YDL085C-A YDL186W COS7 YDR541C PAU2 YEL075C YEL076C IES5 YER137C YER188C-A YER189W DDI2 YFL066C YFL067W YFL068W YGL260W YGR169C-A COS6 COS8 YHL049C YHL050C YPT35 CRP1 YHR213W PHO12 YHR218W YHR219W RRT14 YIR021W-A YIR042C YJL225C YJR154W COS5 YKL222C YKR041W VBA5 PAU17 PAU18 YLL066C YLL067C YLR042C Y…	88	1203
		Down-regulated	response to stress [GO:0006950]	2.75e-13	HSP26 TPS1 SSE2 HSP30 GPD1 FMP45 TPS2 HSP42 GCN2 TIR1 SSA4 HSP12 CTT1 FMP43 PAU12 UTH1 HSP104 PAU4 TSL1 DDR48 HOR7 DDR2 IRA2 GRE1 HSP82	25	152
			oxidation-reduction process [GO:0055114]	8.583e-08	BDH1 BDH2 GDH3 PRX1 UGA2 ZTA1 GPD1 PST2 POX1 CTT1 GND2 AIM17 IRC24 HYR1 TDH1 SOD1 MCR1 JLP1 AHP1 PUT1 ALD3 YNL134C GRE2 IDH2 ALD4	25	272
			glutamate biosynthetic process [GO:0006537]	5.903e-07	GDH3 CIT2 PUT1 ACO1 CIT1 IDH2	6	13
	R238K vs. WT	Up-regulated	No significant enrichment
		Down-regulated	biological_process [GO:0008150]	2.083e-09	BDH2 YAR066W YAR068W YBL044W YBR219C YBR255C-A YBR284W YCL021W-A YCL048W-A YCR024C-B PAU3 YDL007C-A YDL241W AMD2 YDR246W-A YDR366C MTC7 YEL057C DSF1 YER186C YER190C-B PAU5 YFL051C YFL052W YFR035C YGL193C VEL1 YGL258W-A NQM1 RTA1 PAU12 YHL044W PAU13 YHR054C YHR162W YHR210C YHR213W-A YHR214C-E NIT1 YIL169C PAU15 ICS3 PRY1 YJL213W REE1 YJL218W YJR005C-A YLL053C YLL056C PAU23 YLR046C YLR342W-A PAU4 Y…	81	1203
			siderophore transport [GO:0015891]	5.432e-08	FIT1 SIT1 FRE4 FRE3 FIT2 FIT3	6	8
			response to stress [GO:0006950]	4.278e-07	HSP26 PAU3 AAD4 TIR1 PAU5 DAK2 RTA1 YHB1 PAU12 PAU13 PAU15 DAN1 PAU23 YLR046C PAU4 IRA2 TIR4 PAU21 GRE1 PAU22	20	152
			hexose metabolic process [GO:0019318]	1.647e-06	SOR2 YHR210C SOR1 YNR071C	4	4
			iron ion homeostasis [GO:0055072]	2.255e-06	FIT1 SIT1 FRE2 FRE4 ENB1 FRE3 FIT2 FIT3	8	26
	L214V vs. WT	UP	No significant enrichment
		Down-regulated	biological_process [GO:0008150]	3.829e-12	BDH2 YAL067W-A YAR029W YAR066W YAR068W PAU24 YCR099C YCR100C YCR101C PAU3 YDL241W YDR034W-B YDR182W-A YEL057C YEL073C PAU5 YFL068W VEL1 YGL258W-A YPS5 YGL260W YGR121W-A SPG1 PAU12 COS6 YHL042W YHL044W CRG1 YHR213W-A YHR214C-E YHR214W YHR219W YIL169C PAU15 REE1 YJL218W YJL225C VBA5 PAU18 YLL067C YLR460C SPG4 YNL195C YNR068C YNR073C PAU6 IRC10 YOL159C YOL159C-A YOR011W-A HSP33 PAU21 YRF1-8 YPL038W-…	57	1203
			response to stress [GO:0006950]	2.873e-08	PAU24 HSP30 PAU3 TIR1 SSA4 HSP12 PAU5 DAK2 PAU12 PAU15 PAU18 PAU6 HSP33 PAU21 GRE1 PAU22	16	152
